# Supplementary material for: The nuclear GYF protein CD2BP2/U5–52K is required for T cell homeostasis
Source: Front Immunol. 2024 Sep 6;15:1415839. doi: 10.3389/fimmu.2024.1415839 (PMC11412891; doi:10.3389/fimmu.2024.1415839)
Supplement: Supplementary file 4 [file Table3.xlsx]

## Sheet: TR1
index	file_name	scan	charge	precursor_mass	spectra_num	peptide_a	xl_a	pep_pos_a	protein_a	mass_a	n_score_a	n_score_a_MS2_MS3	peptide_b	xl_b	pep_pos_b	protein_b	mass_b	n_score_b	n_score_b_MS2_MS3	protein_a_b	gene_a	gene_b	protein_a_cln	protein_b_cln	AbsPos1	AbsPos2	shared_seq	Protein1	Protein2	pro_site_a	pro_site_b	peptide_a_resort	peptide_b_resort	pro_site_ab	LinkPos1	LinkPos2
1869-1-6-1-9-1	L1_20190826_HS_1023_FU_CL1_5.mgf	8668	4	2076.06	2	KGSTAVGVR	1	28	>sp|O14818|PSA7_HUMAN Proteasome subunit alpha type-7 OS=Homo sapiens GN=PSMA7 PE=1 SV=1	873.503	2.28e-19	3.16e-26	SVAKLQDER	4	49	>sp|O14818|PSA7_HUMAN Proteasome subunit alpha type-7 OS=Homo sapiens GN=PSMA7 PE=1 SV=1,>sp|Q8TAA3-5|PSA7L_HUMAN Isoform 3 of Proteasome subunit alpha type-7-like OS=Homo sapiens GN=PSMA8,>sp|Q8TAA3|PSA7L_HUMAN Proteasome subunit alpha type-7-like OS=Homo sapiens GN=PSMA8 PE=2 SV=3	1044.56	2.28e-19	7.4e-29	>sp|O14818|PSA7_HUMAN Proteasome subunit alpha type-7 OS=Homo sapiens GN=PSMA7 PE=1 SV=1-28->sp|O14818|PSA7_HUMAN Proteasome subunit alpha type-7 OS=Homo sapiens GN=PSMA7 PE=1 SV=1,>sp|Q8TAA3-5|PSA7L_HUMAN Isoform 3 of Proteasome subunit alpha type-7-like OS=Homo sapiens GN=PSMA8,>sp|Q8TAA3|PSA7L_HUMAN Proteasome subunit alpha type-7-like OS=Homo sapiens GN=PSMA8 PE=2 SV=3-52	PSMA7	PSMA7	>sp|O14818|PSA7_HUMAN Proteasome subunit alpha type-7 OS=Homo sapiens GN=PSMA7 PE=1 SV=1	>sp|O14818|PSA7_HUMAN Proteasome subunit alpha type-7 OS=Homo sapiens GN=PSMA7 PE=1 SV=1	28	52	1	sp|O14818|PSA7_HUMAN	sp|O14818|PSA7_HUMAN	PSMA7_28	PSMA7_52	KGSTAVGVR	SVAKLQDER	PSMA7_28-PSMA7_52	28	52
4655-1-9-1-18-1	L1_20190826_HS_1023_FU_CL1_4.mgf	19734	4	3228.68	1	SVAKLQDER	4	49	>sp|O14818|PSA7_HUMAN Proteasome subunit alpha type-7 OS=Homo sapiens GN=PSMA7 PE=1 SV=1,>sp|Q8TAA3-5|PSA7L_HUMAN Isoform 3 of Proteasome subunit alpha type-7-like OS=Homo sapiens GN=PSMA8,>sp|Q8TAA3|PSA7L_HUMAN Proteasome subunit alpha type-7-like OS=Homo sapiens GN=PSMA8 PE=2 SV=3	1044.56	0.00119163	5.36e-11	ALLEVVQSGGKNIELAVMR	11	194	>sp|O14818|PSA7_HUMAN Proteasome subunit alpha type-7 OS=Homo sapiens GN=PSMA7 PE=1 SV=1,>sp|O14818-2|PSA7_HUMAN Isoform 2 of Proteasome subunit alpha type-7 OS=Homo sapiens GN=PSMA7	2026.12	6.11e-30	1.81e-40	>sp|O14818|PSA7_HUMAN Proteasome subunit alpha type-7 OS=Homo sapiens GN=PSMA7 PE=1 SV=1,>sp|O14818-2|PSA7_HUMAN Isoform 2 of Proteasome subunit alpha type-7 OS=Homo sapiens GN=PSMA7-204->sp|O14818|PSA7_HUMAN Proteasome subunit alpha type-7 OS=Homo sapiens GN=PSMA7 PE=1 SV=1,>sp|Q8TAA3-5|PSA7L_HUMAN Isoform 3 of Proteasome subunit alpha type-7-like OS=Homo sapiens GN=PSMA8,>sp|Q8TAA3|PSA7L_HUMAN …	PSMA7	PSMA7	>sp|O14818|PSA7_HUMAN Proteasome subunit alpha type-7 OS=Homo sapiens GN=PSMA7 PE=1 SV=1	>sp|O14818|PSA7_HUMAN Proteasome subunit alpha type-7 OS=Homo sapiens GN=PSMA7 PE=1 SV=1	204	52	1	sp|O14818|PSA7_HUMAN	sp|O14818|PSA7_HUMAN	PSMA7_204	PSMA7_52	ALLEVVQSGGKNIELAVMR	SVAKLQDER	PSMA7_204-PSMA7_52	204	52
2700-2-4-1-1-1	L1_20190826_HS_1023_FU_CL1_4.mgf	13740	5	4371.13	1	AKLGLKPLEVNAIK	2	128	>sp|O43290|SNUT1_HUMAN U4/U6.U5 tri-snRNP-associated protein 1 OS=Homo sapiens GN=SART1 PE=1 SV=1	1492.93	0.291324	8.37e-12	DDGYEAAASSKTSSGDASSLSIEETNK	11	99	>sp|O43290|SNUT1_HUMAN U4/U6.U5 tri-snRNP-associated protein 1 OS=Homo sapiens GN=SART1 PE=1 SV=1	2719.19	6.35e-36	6.35e-36	>sp|O43290|SNUT1_HUMAN U4/U6.U5 tri-snRNP-associated protein 1 OS=Homo sapiens GN=SART1 PE=1 SV=1-109->sp|O43290|SNUT1_HUMAN U4/U6.U5 tri-snRNP-associated protein 1 OS=Homo sapiens GN=SART1 PE=1 SV=1-129	SART1	SART1	>sp|O43290|SNUT1_HUMAN U4/U6.U5 tri-snRNP-associated protein 1 OS=Homo sapiens GN=SART1 PE=1 SV=1	>sp|O43290|SNUT1_HUMAN U4/U6.U5 tri-snRNP-associated protein 1 OS=Homo sapiens GN=SART1 PE=1 SV=1	109	129	0	sp|O43290|SNUT1_HUMAN	sp|O43290|SNUT1_HUMAN	SART1_109	SART1_129	DDGYEAAASSKTSSGDASSLSIEETNK	AKLGLKPLEVNAIK	SART1_109-SART1_129	109	129
2389-1-6-1-2-1	L1_20190826_HS_1023_FU_CL1_5.mgf	10489	4	1800.02	1	EKLAAAK	2	169	>sp|O43290|SNUT1_HUMAN U4/U6.U5 tri-snRNP-associated protein 1 OS=Homo sapiens GN=SART1 PE=1 SV=1	729.438	2.17e-11	2.17e-11	LLNQKLGK	5	179	>sp|O43290|SNUT1_HUMAN U4/U6.U5 tri-snRNP-associated protein 1 OS=Homo sapiens GN=SART1 PE=1 SV=1	912.576	2.45e-17	2.45e-17	>sp|O43290|SNUT1_HUMAN U4/U6.U5 tri-snRNP-associated protein 1 OS=Homo sapiens GN=SART1 PE=1 SV=1-170->sp|O43290|SNUT1_HUMAN U4/U6.U5 tri-snRNP-associated protein 1 OS=Homo sapiens GN=SART1 PE=1 SV=1-183	SART1	SART1	>sp|O43290|SNUT1_HUMAN U4/U6.U5 tri-snRNP-associated protein 1 OS=Homo sapiens GN=SART1 PE=1 SV=1	>sp|O43290|SNUT1_HUMAN U4/U6.U5 tri-snRNP-associated protein 1 OS=Homo sapiens GN=SART1 PE=1 SV=1	170	183	0	sp|O43290|SNUT1_HUMAN	sp|O43290|SNUT1_HUMAN	SART1_170	SART1_183	EKLAAAK	LLNQKLGK	SART1_170-SART1_183	170	183
2163-1-7-1-2-1	L1_20190826_HS_1023_FU_CL1_5.mgf	9689	4	1800.02	3	LAAAKEK	5	171	>sp|O43290|SNUT1_HUMAN U4/U6.U5 tri-snRNP-associated protein 1 OS=Homo sapiens GN=SART1 PE=1 SV=1	729.438	7.92e-08	1.79e-17	LLNQKLGK	5	179	>sp|O43290|SNUT1_HUMAN U4/U6.U5 tri-snRNP-associated protein 1 OS=Homo sapiens GN=SART1 PE=1 SV=1	912.576	1.07e-11	5.84e-21	>sp|O43290|SNUT1_HUMAN U4/U6.U5 tri-snRNP-associated protein 1 OS=Homo sapiens GN=SART1 PE=1 SV=1-175->sp|O43290|SNUT1_HUMAN U4/U6.U5 tri-snRNP-associated protein 1 OS=Homo sapiens GN=SART1 PE=1 SV=1-183	SART1	SART1	>sp|O43290|SNUT1_HUMAN U4/U6.U5 tri-snRNP-associated protein 1 OS=Homo sapiens GN=SART1 PE=1 SV=1	>sp|O43290|SNUT1_HUMAN U4/U6.U5 tri-snRNP-associated protein 1 OS=Homo sapiens GN=SART1 PE=1 SV=1	175	183	0	sp|O43290|SNUT1_HUMAN	sp|O43290|SNUT1_HUMAN	SART1_175	SART1_183	LAAAKEK	LLNQKLGK	SART1_175-SART1_183	175	183
4574-2-3-1-13-1	L1_20190826_HS_1023_FU_CL1_7.mgf	17277	5	3819.86	1	AEKNVELR	3	300	>sp|O43290|SNUT1_HUMAN U4/U6.U5 tri-snRNP-associated protein 1 OS=Homo sapiens GN=SART1 PE=1 SV=1	957.524	1.65e-06	2.6e-14	KKPDYLPYAEDESVDDLAQQKPR	1	309	>sp|O43290|SNUT1_HUMAN U4/U6.U5 tri-snRNP-associated protein 1 OS=Homo sapiens GN=SART1 PE=1 SV=1	2704.33	0.000306829	2.21e-25	>sp|O43290|SNUT1_HUMAN U4/U6.U5 tri-snRNP-associated protein 1 OS=Homo sapiens GN=SART1 PE=1 SV=1-302->sp|O43290|SNUT1_HUMAN U4/U6.U5 tri-snRNP-associated protein 1 OS=Homo sapiens GN=SART1 PE=1 SV=1-309	SART1	SART1	>sp|O43290|SNUT1_HUMAN U4/U6.U5 tri-snRNP-associated protein 1 OS=Homo sapiens GN=SART1 PE=1 SV=1	>sp|O43290|SNUT1_HUMAN U4/U6.U5 tri-snRNP-associated protein 1 OS=Homo sapiens GN=SART1 PE=1 SV=1	302	309	0	sp|O43290|SNUT1_HUMAN	sp|O43290|SNUT1_HUMAN	SART1_302	SART1_309	AEKNVELR	KKPDYLPYAEDESVDDLAQQKPR	SART1_302-SART1_309	302	309
4209-1-3-1-209-1	L1_20190826_HS_1023_FU_CL1_5.mgf	16552	5	3691.77	1	AEKNVELR	3	300	>sp|O43290|SNUT1_HUMAN U4/U6.U5 tri-snRNP-associated protein 1 OS=Homo sapiens GN=SART1 PE=1 SV=1	957.524	0.00284974	6.3e-13	KPDYLPYAEDESVDDLAQQKPR	1	310	>sp|O43290|SNUT1_HUMAN U4/U6.U5 tri-snRNP-associated protein 1 OS=Homo sapiens GN=SART1 PE=1 SV=1	2576.24	5.16e-08	5.69e-29	>sp|O43290|SNUT1_HUMAN U4/U6.U5 tri-snRNP-associated protein 1 OS=Homo sapiens GN=SART1 PE=1 SV=1-302->sp|O43290|SNUT1_HUMAN U4/U6.U5 tri-snRNP-associated protein 1 OS=Homo sapiens GN=SART1 PE=1 SV=1-310	SART1	SART1	>sp|O43290|SNUT1_HUMAN U4/U6.U5 tri-snRNP-associated protein 1 OS=Homo sapiens GN=SART1 PE=1 SV=1	>sp|O43290|SNUT1_HUMAN U4/U6.U5 tri-snRNP-associated protein 1 OS=Homo sapiens GN=SART1 PE=1 SV=1	302	310	0	sp|O43290|SNUT1_HUMAN	sp|O43290|SNUT1_HUMAN	SART1_302	SART1_310	AEKNVELR	KPDYLPYAEDESVDDLAQQKPR	SART1_302-SART1_310	302	310
3658-1-1-1-14-1	L1_20190826_HS_1023_FU_CL1_4.mgf	16715	4	3004.5	1	GTQVYSPEKGR	9	830	>sp|O75643|U520_HUMAN U5 small nuclear ribonucleoprotein 200 kDa helicase OS=Homo sapiens GN=SNRNP200 PE=1 SV=2	1220.61	6.64e-11	6.64e-11	VFSLSSEFKNITVR	9	1017	>sp|O75643|U520_HUMAN U5 small nuclear ribonucleoprotein 200 kDa helicase OS=Homo sapiens GN=SNRNP200 PE=1 SV=2	1625.88	4.49e-10	2.43e-19	>sp|O75643|U520_HUMAN U5 small nuclear ribonucleoprotein 200 kDa helicase OS=Homo sapiens GN=SNRNP200 PE=1 SV=2-1025->sp|O75643|U520_HUMAN U5 small nuclear ribonucleoprotein 200 kDa helicase OS=Homo sapiens GN=SNRNP200 PE=1 SV=2-838	SNRNP200	SNRNP200	>sp|O75643|U520_HUMAN U5 small nuclear ribonucleoprotein 200 kDa helicase OS=Homo sapiens GN=SNRNP200 PE=1 SV=2	>sp|O75643|U520_HUMAN U5 small nuclear ribonucleoprotein 200 kDa helicase OS=Homo sapiens GN=SNRNP200 PE=1 SV=2	1025	838	0	sp|O75643|U520_HUMAN	sp|O75643|U520_HUMAN	SNRNP200_1025	SNRNP200_838	VFSLSSEFKNITVR	GTQVYSPEKGR	SNRNP200_1025-SNRNP200_838	1025	838
4601-1-7-1-15-1	L1_20190826_HS_1023_FU_CL1_6.mgf	17819	5	3899.85	1	GNNPKGYLPSHYER	5	2245	>sp|Q6P2Q9|PRP8_HUMAN Pre-mRNA-processing-splicing factor 8 OS=Homo sapiens GN=PRPF8 PE=1 SV=2	1630.79	0.00930351	1.93e-18	SLQYEYKANSNLVLQADR	7	8	>sp|O75643|U520_HUMAN U5 small nuclear ribonucleoprotein 200 kDa helicase OS=Homo sapiens GN=SNRNP200 PE=1 SV=2	2111.06	5.98e-32	5.98e-32	>sp|O75643|U520_HUMAN U5 small nuclear ribonucleoprotein 200 kDa helicase OS=Homo sapiens GN=SNRNP200 PE=1 SV=2-14->sp|Q6P2Q9|PRP8_HUMAN Pre-mRNA-processing-splicing factor 8 OS=Homo sapiens GN=PRPF8 PE=1 SV=2-2249	PRPF8	SNRNP200	>sp|Q6P2Q9|PRP8_HUMAN Pre-mRNA-processing-splicing factor 8 OS=Homo sapiens GN=PRPF8 PE=1 SV=2	>sp|O75643|U520_HUMAN U5 small nuclear ribonucleoprotein 200 kDa helicase OS=Homo sapiens GN=SNRNP200 PE=1 SV=2	2249	14	0	sp|Q6P2Q9|PRP8_HUMAN	sp|O75643|U520_HUMAN	PRPF8_2249	SNRNP200_14	GNNPKGYLPSHYER	SLQYEYKANSNLVLQADR	PRPF8_2249-SNRNP200_14	2249	14
2581-1-24-1-15-1	L1_20190826_HS_1023_FU_CL1_3.mgf	15025	4	4095.06	1	ALNMoAIPGGPKFEPLVR	11	268	>sp|Q6P2Q9|PRP8_HUMAN Pre-mRNA-processing-splicing factor 8 OS=Homo sapiens GN=PRPF8 PE=1 SV=2	1824.99	8.16e-05	3.97e-12	SLQYEYKANSNLVLQADR	7	8	>sp|O75643|U520_HUMAN U5 small nuclear ribonucleoprotein 200 kDa helicase OS=Homo sapiens GN=SNRNP200 PE=1 SV=2	2111.06	8.37e-15	1.79e-23	>sp|O75643|U520_HUMAN U5 small nuclear ribonucleoprotein 200 kDa helicase OS=Homo sapiens GN=SNRNP200 PE=1 SV=2-14->sp|Q6P2Q9|PRP8_HUMAN Pre-mRNA-processing-splicing factor 8 OS=Homo sapiens GN=PRPF8 PE=1 SV=2-278	PRPF8	SNRNP200	>sp|Q6P2Q9|PRP8_HUMAN Pre-mRNA-processing-splicing factor 8 OS=Homo sapiens GN=PRPF8 PE=1 SV=2	>sp|O75643|U520_HUMAN U5 small nuclear ribonucleoprotein 200 kDa helicase OS=Homo sapiens GN=SNRNP200 PE=1 SV=2	278	14	0	sp|Q6P2Q9|PRP8_HUMAN	sp|O75643|U520_HUMAN	PRPF8_278	SNRNP200_14	ALNMoAIPGGPKFEPLVR	SLQYEYKANSNLVLQADR	PRPF8_278-SNRNP200_14	278	14
4775-1-6-1-15-1	L1_20190826_HS_1023_FU_CL1_7.mgf	17889	4	3263.62	1	ELHAIKER	6	246	>sp|Q9BUQ8|DDX23_HUMAN Probable ATP-dependent RNA helicase DDX23 OS=Homo sapiens GN=DDX23 PE=1 SV=3	994.556	3.79e-05	3.97e-16	SLQYEYKANSNLVLQADR	7	8	>sp|O75643|U520_HUMAN U5 small nuclear ribonucleoprotein 200 kDa helicase OS=Homo sapiens GN=SNRNP200 PE=1 SV=2	2111.06	1.85e-38	7.26e-50	>sp|O75643|U520_HUMAN U5 small nuclear ribonucleoprotein 200 kDa helicase OS=Homo sapiens GN=SNRNP200 PE=1 SV=2-14->sp|Q9BUQ8|DDX23_HUMAN Probable ATP-dependent RNA helicase DDX23 OS=Homo sapiens GN=DDX23 PE=1 SV=3-251	DDX23	SNRNP200	>sp|Q9BUQ8|DDX23_HUMAN Probable ATP-dependent RNA helicase DDX23 OS=Homo sapiens GN=DDX23 PE=1 SV=3	>sp|O75643|U520_HUMAN U5 small nuclear ribonucleoprotein 200 kDa helicase OS=Homo sapiens GN=SNRNP200 PE=1 SV=2	251	14	0	sp|Q9BUQ8|DDX23_HUMAN	sp|O75643|U520_HUMAN	DDX23_251	SNRNP200_14	ELHAIKER	SLQYEYKANSNLVLQADR	DDX23_251-SNRNP200_14	251	14
2113-1-6-1-8-1	L1_20190826_HS_1023_FU_CL1_3.mgf	13576	4	3142.74	1	LLGKGNIIISTPEK	4	1418	>sp|O75643|U520_HUMAN U5 small nuclear ribonucleoprotein 200 kDa helicase OS=Homo sapiens GN=SNRNP200 PE=1 SV=2	1481.88	1.17e-11	1.23e-20	KVVLLTGETSTDLK	1	1404	>sp|O75643|U520_HUMAN U5 small nuclear ribonucleoprotein 200 kDa helicase OS=Homo sapiens GN=SNRNP200 PE=1 SV=2	1502.86	1.27e-37	1.27e-37	>sp|O75643|U520_HUMAN U5 small nuclear ribonucleoprotein 200 kDa helicase OS=Homo sapiens GN=SNRNP200 PE=1 SV=2-1404->sp|O75643|U520_HUMAN U5 small nuclear ribonucleoprotein 200 kDa helicase OS=Homo sapiens GN=SNRNP200 PE=1 SV=2-1421	SNRNP200	SNRNP200	>sp|O75643|U520_HUMAN U5 small nuclear ribonucleoprotein 200 kDa helicase OS=Homo sapiens GN=SNRNP200 PE=1 SV=2	>sp|O75643|U520_HUMAN U5 small nuclear ribonucleoprotein 200 kDa helicase OS=Homo sapiens GN=SNRNP200 PE=1 SV=2	1404	1421	0	sp|O75643|U520_HUMAN	sp|O75643|U520_HUMAN	SNRNP200_1404	SNRNP200_1421	KVVLLTGETSTDLK	LLGKGNIIISTPEK	SNRNP200_1404-SNRNP200_1421	1404	1421
2816-1-8-1-8-1	L1_20190826_HS_1023_FU_CL1_2.mgf	15851	4	3853.09	2	VVLLTGETSTDLKLLGK	13	1405	>sp|O75643|U520_HUMAN U5 small nuclear ribonucleoprotein 200 kDa helicase OS=Homo sapiens GN=SNRNP200 PE=1 SV=2	1786.05	2.2e-18	2.81e-30	EEEVTGPVIAPLFPQKR	16	2044	>sp|O75643|U520_HUMAN U5 small nuclear ribonucleoprotein 200 kDa helicase OS=Homo sapiens GN=SNRNP200 PE=1 SV=2	1909.03	3.52e-27	3.24e-38	>sp|O75643|U520_HUMAN U5 small nuclear ribonucleoprotein 200 kDa helicase OS=Homo sapiens GN=SNRNP200 PE=1 SV=2-1417->sp|O75643|U520_HUMAN U5 small nuclear ribonucleoprotein 200 kDa helicase OS=Homo sapiens GN=SNRNP200 PE=1 SV=2-2059	SNRNP200	SNRNP200	>sp|O75643|U520_HUMAN U5 small nuclear ribonucleoprotein 200 kDa helicase OS=Homo sapiens GN=SNRNP200 PE=1 SV=2	>sp|O75643|U520_HUMAN U5 small nuclear ribonucleoprotein 200 kDa helicase OS=Homo sapiens GN=SNRNP200 PE=1 SV=2	1417	2059	0	sp|O75643|U520_HUMAN	sp|O75643|U520_HUMAN	SNRNP200_1417	SNRNP200_2059	VVLLTGETSTDLKLLGK	EEEVTGPVIAPLFPQKR	SNRNP200_1417-SNRNP200_2059	1417	2059
2897-1-6-1-8-1	L1_20190826_HS_1023_FU_CL1_3.mgf	16027	4	3548.91	1	LLGKGNIIISTPEK	4	1418	>sp|O75643|U520_HUMAN U5 small nuclear ribonucleoprotein 200 kDa helicase OS=Homo sapiens GN=SNRNP200 PE=1 SV=2	1481.88	0.00193977	1.18e-15	EEEVTGPVIAPLFPQKR	16	2044	>sp|O75643|U520_HUMAN U5 small nuclear ribonucleoprotein 200 kDa helicase OS=Homo sapiens GN=SNRNP200 PE=1 SV=2	1909.03	3.21e-26	6.2e-39	>sp|O75643|U520_HUMAN U5 small nuclear ribonucleoprotein 200 kDa helicase OS=Homo sapiens GN=SNRNP200 PE=1 SV=2-1421->sp|O75643|U520_HUMAN U5 small nuclear ribonucleoprotein 200 kDa helicase OS=Homo sapiens GN=SNRNP200 PE=1 SV=2-2059	SNRNP200	SNRNP200	>sp|O75643|U520_HUMAN U5 small nuclear ribonucleoprotein 200 kDa helicase OS=Homo sapiens GN=SNRNP200 PE=1 SV=2	>sp|O75643|U520_HUMAN U5 small nuclear ribonucleoprotein 200 kDa helicase OS=Homo sapiens GN=SNRNP200 PE=1 SV=2	1421	2059	0	sp|O75643|U520_HUMAN	sp|O75643|U520_HUMAN	SNRNP200_1421	SNRNP200_2059	LLGKGNIIISTPEK	EEEVTGPVIAPLFPQKR	SNRNP200_1421-SNRNP200_2059	1421	2059
2342-1-4-1-15-1	L1_20190826_HS_1023_FU_CL1_8.mgf	10340	4	2527.29	1	NNLVKYDK	5	967	>sp|O75643|U520_HUMAN U5 small nuclear ribonucleoprotein 200 kDa helicase OS=Homo sapiens GN=SNRNP200 PE=1 SV=2	992.529	4.3e-16	4.3e-16	PVYHAITKHSPK	8	1545	>sp|O75643|U520_HUMAN U5 small nuclear ribonucleoprotein 200 kDa helicase OS=Homo sapiens GN=SNRNP200 PE=1 SV=2	1376.76	2.74e-12	5.9e-34	>sp|O75643|U520_HUMAN U5 small nuclear ribonucleoprotein 200 kDa helicase OS=Homo sapiens GN=SNRNP200 PE=1 SV=2-1552->sp|O75643|U520_HUMAN U5 small nuclear ribonucleoprotein 200 kDa helicase OS=Homo sapiens GN=SNRNP200 PE=1 SV=2-971	SNRNP200	SNRNP200	>sp|O75643|U520_HUMAN U5 small nuclear ribonucleoprotein 200 kDa helicase OS=Homo sapiens GN=SNRNP200 PE=1 SV=2	>sp|O75643|U520_HUMAN U5 small nuclear ribonucleoprotein 200 kDa helicase OS=Homo sapiens GN=SNRNP200 PE=1 SV=2	1552	971	0	sp|O75643|U520_HUMAN	sp|O75643|U520_HUMAN	SNRNP200_1552	SNRNP200_971	PVYHAITKHSPK	NNLVKYDK	SNRNP200_1552-SNRNP200_971	1552	971
3472-1-5-1-22-1	L1_20190826_HS_1023_FU_CL1_7.mgf	13868	4	2946.52	1	YHVLVNLGKK	9	169	>sp|O75643|U520_HUMAN U5 small nuclear ribonucleoprotein 200 kDa helicase OS=Homo sapiens GN=SNRNP200 PE=1 SV=2	1169.69	2.67e-10	2.37e-18	QTKEQSQLTATQTR	3	2032	>sp|Q6P2Q9|PRP8_HUMAN Pre-mRNA-processing-splicing factor 8 OS=Homo sapiens GN=PRPF8 PE=1 SV=2	1618.83	2.7e-27	6.38e-39	>sp|O75643|U520_HUMAN U5 small nuclear ribonucleoprotein 200 kDa helicase OS=Homo sapiens GN=SNRNP200 PE=1 SV=2-177->sp|Q6P2Q9|PRP8_HUMAN Pre-mRNA-processing-splicing factor 8 OS=Homo sapiens GN=PRPF8 PE=1 SV=2-2034	PRPF8	SNRNP200	>sp|Q6P2Q9|PRP8_HUMAN Pre-mRNA-processing-splicing factor 8 OS=Homo sapiens GN=PRPF8 PE=1 SV=2	>sp|O75643|U520_HUMAN U5 small nuclear ribonucleoprotein 200 kDa helicase OS=Homo sapiens GN=SNRNP200 PE=1 SV=2	2034	177	0	sp|Q6P2Q9|PRP8_HUMAN	sp|O75643|U520_HUMAN	PRPF8_2034	SNRNP200_177	QTKEQSQLTATQTR	YHVLVNLGKK	PRPF8_2034-SNRNP200_177	2034	177
6556-1-8-1-10-1	L1_20190826_HS_1023_FU_CL1_6.mgf	24125	4	3408.65	1	IMGKMEADPELSK	4	346	>sp|O75643|U520_HUMAN U5 small nuclear ribonucleoprotein 200 kDa helicase OS=Homo sapiens GN=SNRNP200 PE=1 SV=2	1447.71	2.13e-08	3.91e-19	KADEVLEILKTASDDR	10	285	>sp|O75643|U520_HUMAN U5 small nuclear ribonucleoprotein 200 kDa helicase OS=Homo sapiens GN=SNRNP200 PE=1 SV=2	1801.94	1.38e-11	2.11e-26	>sp|O75643|U520_HUMAN U5 small nuclear ribonucleoprotein 200 kDa helicase OS=Homo sapiens GN=SNRNP200 PE=1 SV=2-294->sp|O75643|U520_HUMAN U5 small nuclear ribonucleoprotein 200 kDa helicase OS=Homo sapiens GN=SNRNP200 PE=1 SV=2-349	SNRNP200	SNRNP200	>sp|O75643|U520_HUMAN U5 small nuclear ribonucleoprotein 200 kDa helicase OS=Homo sapiens GN=SNRNP200 PE=1 SV=2	>sp|O75643|U520_HUMAN U5 small nuclear ribonucleoprotein 200 kDa helicase OS=Homo sapiens GN=SNRNP200 PE=1 SV=2	294	349	0	sp|O75643|U520_HUMAN	sp|O75643|U520_HUMAN	SNRNP200_294	SNRNP200_349	KADEVLEILKTASDDR	IMGKMEADPELSK	SNRNP200_294-SNRNP200_349	294	349
6214-1-33-1-8-1	L1_20190826_HS_1023_FU_CL1_8.mgf	22522	6	4112.16	1	IQSKLYR	4	484	>sp|O75643|U520_HUMAN U5 small nuclear ribonucleoprotein 200 kDa helicase OS=Homo sapiens GN=SNRNP200 PE=1 SV=2	906.529	0.000413116	7.32e-13	KGYEEVHVPALKPKPFGSEEQLLPVEK	14	440	>sp|O75643|U520_HUMAN U5 small nuclear ribonucleoprotein 200 kDa helicase OS=Homo sapiens GN=SNRNP200 PE=1 SV=2	3047.63	1.87e-15	2.25e-38	>sp|O75643|U520_HUMAN U5 small nuclear ribonucleoprotein 200 kDa helicase OS=Homo sapiens GN=SNRNP200 PE=1 SV=2-453->sp|O75643|U520_HUMAN U5 small nuclear ribonucleoprotein 200 kDa helicase OS=Homo sapiens GN=SNRNP200 PE=1 SV=2-487	SNRNP200	SNRNP200	>sp|O75643|U520_HUMAN U5 small nuclear ribonucleoprotein 200 kDa helicase OS=Homo sapiens GN=SNRNP200 PE=1 SV=2	>sp|O75643|U520_HUMAN U5 small nuclear ribonucleoprotein 200 kDa helicase OS=Homo sapiens GN=SNRNP200 PE=1 SV=2	453	487	0	sp|O75643|U520_HUMAN	sp|O75643|U520_HUMAN	SNRNP200_453	SNRNP200_487	KGYEEVHVPALKPKPFGSEEQLLPVEK	IQSKLYR	SNRNP200_453-SNRNP200_487	453	487
2774-1-5-1-11-1	L1_20190826_HS_1023_FU_CL1_3.mgf	15645	4	3568.79	2	YAQAGFEGFKTLNR	10	470	>sp|O75643|U520_HUMAN U5 small nuclear ribonucleoprotein 200 kDa helicase OS=Homo sapiens GN=SNRNP200 PE=1 SV=2	1600.8	1.09e-31	3.4e-46	PFGSEEQLLPVEKLPK	13	454	>sp|O75643|U520_HUMAN U5 small nuclear ribonucleoprotein 200 kDa helicase OS=Homo sapiens GN=SNRNP200 PE=1 SV=2	1809.99	9.48e-20	8.26e-30	>sp|O75643|U520_HUMAN U5 small nuclear ribonucleoprotein 200 kDa helicase OS=Homo sapiens GN=SNRNP200 PE=1 SV=2-466->sp|O75643|U520_HUMAN U5 small nuclear ribonucleoprotein 200 kDa helicase OS=Homo sapiens GN=SNRNP200 PE=1 SV=2-479	SNRNP200	SNRNP200	>sp|O75643|U520_HUMAN U5 small nuclear ribonucleoprotein 200 kDa helicase OS=Homo sapiens GN=SNRNP200 PE=1 SV=2	>sp|O75643|U520_HUMAN U5 small nuclear ribonucleoprotein 200 kDa helicase OS=Homo sapiens GN=SNRNP200 PE=1 SV=2	466	479	0	sp|O75643|U520_HUMAN	sp|O75643|U520_HUMAN	SNRNP200_466	SNRNP200_479	PFGSEEQLLPVEKLPK	YAQAGFEGFKTLNR	SNRNP200_466-SNRNP200_479	466	479
3342-1-2-1-7-1	L1_20190826_HS_1023_FU_CL1_5.mgf	13883	4	2499.24	2	NNLVKYDK	5	967	>sp|O75643|U520_HUMAN U5 small nuclear ribonucleoprotein 200 kDa helicase OS=Homo sapiens GN=SNRNP200 PE=1 SV=2	992.529	3.72e-07	3.87e-14	KTGNFQVTELGR	1	975	>sp|O75643|U520_HUMAN U5 small nuclear ribonucleoprotein 200 kDa helicase OS=Homo sapiens GN=SNRNP200 PE=1 SV=2	1348.71	4.53e-20	2.83e-33	>sp|O75643|U520_HUMAN U5 small nuclear ribonucleoprotein 200 kDa helicase OS=Homo sapiens GN=SNRNP200 PE=1 SV=2-971->sp|O75643|U520_HUMAN U5 small nuclear ribonucleoprotein 200 kDa helicase OS=Homo sapiens GN=SNRNP200 PE=1 SV=2-975	SNRNP200	SNRNP200	>sp|O75643|U520_HUMAN U5 small nuclear ribonucleoprotein 200 kDa helicase OS=Homo sapiens GN=SNRNP200 PE=1 SV=2	>sp|O75643|U520_HUMAN U5 small nuclear ribonucleoprotein 200 kDa helicase OS=Homo sapiens GN=SNRNP200 PE=1 SV=2	971	975	0	sp|O75643|U520_HUMAN	sp|O75643|U520_HUMAN	SNRNP200_971	SNRNP200_975	NNLVKYDK	KTGNFQVTELGR	SNRNP200_971-SNRNP200_975	971	975
1785-1-10-1-4-1	L1_20190826_HS_1023_FU_CL1_4.mgf	10532	4	3407.58	1	GKYYAVNYPLR	2	219	>sp|Q13547|HDAC1_HUMAN Histone deacetylase 1 OS=Homo sapiens GN=HDAC1 PE=1 SV=1,>tr|Q5TEE2|Q5TEE2_HUMAN Histone deacetylase 1 (Fragment) OS=Homo sapiens GN=HDAC1 PE=1 SV=1	1342.7	2.46e-10	5.32e-24	EFEEESKQPGVSEQQR	7	65	>sp|O94776|MTA2_HUMAN Metastasis-associated protein MTA2 OS=Homo sapiens GN=MTA2 PE=1 SV=1	1905.87	3.55e-07	6.07e-17	>sp|O94776|MTA2_HUMAN Metastasis-associated protein MTA2 OS=Homo sapiens GN=MTA2 PE=1 SV=1-71->sp|Q13547|HDAC1_HUMAN Histone deacetylase 1 OS=Homo sapiens GN=HDAC1 PE=1 SV=1,>tr|Q5TEE2|Q5TEE2_HUMAN Histone deacetylase 1 (Fragment) OS=Homo sapiens GN=HDAC1 PE=1 SV=1-220	HDAC1	MTA2	>sp|Q13547|HDAC1_HUMAN Histone deacetylase 1 OS=Homo sapiens GN=HDAC1 PE=1 SV=1	>sp|O94776|MTA2_HUMAN Metastasis-associated protein MTA2 OS=Homo sapiens GN=MTA2 PE=1 SV=1	220	71	1	sp|Q13547|HDAC1_HUMAN	sp|O94776|MTA2_HUMAN	HDAC1_220	MTA2_71	GKYYAVNYPLR	EFEEESKQPGVSEQQR	HDAC1_220-MTA2_71	220	71
3140-1-3-1-2-1	L1_20190826_HS_1023_FU_CL1_6.mgf	13160	5	2576.41	1	GTKTPINR	3	537	>sp|O94776|MTA2_HUMAN Metastasis-associated protein MTA2 OS=Homo sapiens GN=MTA2 PE=1 SV=1,>sp|O94776-2|MTA2_HUMAN Isoform 2 of Metastasis-associated protein MTA2 OS=Homo sapiens GN=MTA2	885.503	1.85e-05	5.53e-13	DLVAQAPLKPKTPR	9	523	>sp|O94776|MTA2_HUMAN Metastasis-associated protein MTA2 OS=Homo sapiens GN=MTA2 PE=1 SV=1,>sp|O94776-2|MTA2_HUMAN Isoform 2 of Metastasis-associated protein MTA2 OS=Homo sapiens GN=MTA2	1532.9	1.09e-13	1.74e-25	>sp|O94776|MTA2_HUMAN Metastasis-associated protein MTA2 OS=Homo sapiens GN=MTA2 PE=1 SV=1,>sp|O94776-2|MTA2_HUMAN Isoform 2 of Metastasis-associated protein MTA2 OS=Homo sapiens GN=MTA2-531->sp|O94776|MTA2_HUMAN Metastasis-associated protein MTA2 OS=Homo sapiens GN=MTA2 PE=1 SV=1,>sp|O94776-2|MTA2_HUMAN Isoform 2 of Metastasis-associated protein MTA2 OS=Homo sapiens GN=MTA2-539	MTA2	MTA2	>sp|O94776|MTA2_HUMAN Metastasis-associated protein MTA2 OS=Homo sapiens GN=MTA2 PE=1 SV=1	>sp|O94776|MTA2_HUMAN Metastasis-associated protein MTA2 OS=Homo sapiens GN=MTA2 PE=1 SV=1	531	539	1	sp|O94776|MTA2_HUMAN	sp|O94776|MTA2_HUMAN	MTA2_531	MTA2_539	DLVAQAPLKPKTPR	GTKTPINR	MTA2_531-MTA2_539	531	539
5566-1-3-1-11-1	L1_20190826_HS_1023_FU_CL1_6.mgf	20783	5	3295.66	2	KALTHLEMoR	1	618	>sp|O94776|MTA2_HUMAN Metastasis-associated protein MTA2 OS=Homo sapiens GN=MTA2 PE=1 SV=1,>sp|O94776-2|MTA2_HUMAN Isoform 2 of Metastasis-associated protein MTA2 OS=Homo sapiens GN=MTA2	1113.6	1	1.12e-11	LNPADAPNPVVFVATKDTR	16	596	>sp|O94776|MTA2_HUMAN Metastasis-associated protein MTA2 OS=Homo sapiens GN=MTA2 PE=1 SV=1,>sp|O94776-2|MTA2_HUMAN Isoform 2 of Metastasis-associated protein MTA2 OS=Homo sapiens GN=MTA2	2024.07	1.42e-43	6.08e-59	>sp|O94776|MTA2_HUMAN Metastasis-associated protein MTA2 OS=Homo sapiens GN=MTA2 PE=1 SV=1,>sp|O94776-2|MTA2_HUMAN Isoform 2 of Metastasis-associated protein MTA2 OS=Homo sapiens GN=MTA2-611->sp|O94776|MTA2_HUMAN Metastasis-associated protein MTA2 OS=Homo sapiens GN=MTA2 PE=1 SV=1,>sp|O94776-2|MTA2_HUMAN Isoform 2 of Metastasis-associated protein MTA2 OS=Homo sapiens GN=MTA2-618	MTA2	MTA2	>sp|O94776|MTA2_HUMAN Metastasis-associated protein MTA2 OS=Homo sapiens GN=MTA2 PE=1 SV=1	>sp|O94776|MTA2_HUMAN Metastasis-associated protein MTA2 OS=Homo sapiens GN=MTA2 PE=1 SV=1	-1	611	1	sp|O94776|MTA2_HUMAN	sp|O94776|MTA2_HUMAN	MTA2_	1	KALTHLEMoR	LNPADAPNPVVFVATKDTR	MTA2_-1-MTA2_611	-1	611
3405-1-1-1-12-1	L1_20190826_HS_1023_FU_CL1_7.mgf	13626	4	2435.28	2	LLAKAR	4	664	>sp|O94906|PRP6_HUMAN Pre-mRNA-processing factor 6 OS=Homo sapiens GN=PRPF6 PE=1 SV=1	670.449	0.00057112	5.7e-11	KLDPPGGQFYNSKR	13	321	>sp|O95400|CD2B2_HUMAN CD2 antigen cytoplasmic tail-binding protein 2 OS=Homo sapiens GN=CD2BP2 PE=1 SV=1,>sp|O95400|CD2B2	1605.83	1.4e-11	4.49e-18	>sp|O94906|PRP6_HUMAN Pre-mRNA-processing factor 6 OS=Homo sapiens GN=PRPF6 PE=1 SV=1-667->sp|O95400|CD2B2_HUMAN CD2 antigen cytoplasmic tail-binding protein 2 OS=Homo sapiens GN=CD2BP2 PE=1 SV=1,>sp|O95400|CD2B2-333	CD2BP2	PRPF6	>sp|O95400|CD2B2_HUMAN CD2 antigen cytoplasmic tail-binding protein 2 OS=Homo sapiens GN=CD2BP2 PE=1 SV=1	>sp|O94906|PRP6_HUMAN Pre-mRNA-processing factor 6 OS=Homo sapiens GN=PRPF6 PE=1 SV=1	333	667	1	sp|O95400|CD2B2_HUMAN	sp|O94906|PRP6_HUMAN	CD2BP2_333	PRPF6_667	KLDPPGGQFYNSKR	LLAKAR	CD2BP2_333-PRPF6_667	333	667
5081-1-1-1-8-1	L1_20190826_HS_1023_FU_CL1_7.mgf	18809	4	2160.28	1	LLAKAR	4	664	>sp|O94906|PRP6_HUMAN Pre-mRNA-processing factor 6 OS=Homo sapiens GN=PRPF6 PE=1 SV=1	670.449	3.33e-08	3.15e-17	KGPELPLVPVKR	11	8	>sp|Q96DI7|SNR40_HUMAN U5 small nuclear ribonucleoprotein 40 kDa protein OS=Homo sapiens GN=SNRNP40 PE=1 SV=1,>sp|Q96DI7-2|SNR40_HUMAN Isoform 2 of U5 small nuclear ribonucleoprotein 40 kDa protein OS=Homo sapiens GN=SNRNP40	1331.83	0.000139707	1.98e-15	>sp|O94906|PRP6_HUMAN Pre-mRNA-processing factor 6 OS=Homo sapiens GN=PRPF6 PE=1 SV=1-667->sp|Q96DI7|SNR40_HUMAN U5 small nuclear ribonucleoprotein 40 kDa protein OS=Homo sapiens GN=SNRNP40 PE=1 SV=1,>sp|Q96DI7-2|SNR40_HUMAN Isoform 2 of U5 small nuclear ribonucleoprotein 40 kDa protein OS=Homo sapiens GN=SNRNP40-18	PRPF6	SNRNP40	>sp|O94906|PRP6_HUMAN Pre-mRNA-processing factor 6 OS=Homo sapiens GN=PRPF6 PE=1 SV=1	>sp|Q96DI7|SNR40_HUMAN U5 small nuclear ribonucleoprotein 40 kDa protein OS=Homo sapiens GN=SNRNP40 PE=1 SV=1	667	18	1	sp|O94906|PRP6_HUMAN	sp|Q96DI7|SNR40_HUMAN	PRPF6_667	SNRNP40_18	LLAKAR	KGPELPLVPVKR	PRPF6_667-SNRNP40_18	667	18
2779-2-8-1-12-1	L1_20190826_HS_1023_FU_CL1_7.mgf	11626	4	2652.33	1	TVTKQR	4	671	>sp|Q6P2Q9|PRP8_HUMAN Pre-mRNA-processing-splicing factor 8 OS=Homo sapiens GN=PRPF8 PE=1 SV=2	731.429	2.06e-08	8.83e-15	MoERPKIQQQFSDLK	5	133	>sp|O94906|PRP6_HUMAN Pre-mRNA-processing factor 6 OS=Homo sapiens GN=PRPF6 PE=1 SV=1,>sp|O94906-2|PRP6_HUMAN Isoform 2 of Pre-mRNA-processing factor 6 OS=Homo sapiens GN=PRPF6	1762.9	7.94e-18	8.06e-31	>sp|O94906|PRP6_HUMAN Pre-mRNA-processing factor 6 OS=Homo sapiens GN=PRPF6 PE=1 SV=1,>sp|O94906-2|PRP6_HUMAN Isoform 2 of Pre-mRNA-processing factor 6 OS=Homo sapiens GN=PRPF6-137->sp|Q6P2Q9|PRP8_HUMAN Pre-mRNA-processing-splicing factor 8 OS=Homo sapiens GN=PRPF8 PE=1 SV=2-674	PRPF6	PRPF8	>sp|O94906|PRP6_HUMAN Pre-mRNA-processing factor 6 OS=Homo sapiens GN=PRPF6 PE=1 SV=1	>sp|Q6P2Q9|PRP8_HUMAN Pre-mRNA-processing-splicing factor 8 OS=Homo sapiens GN=PRPF8 PE=1 SV=2	3	674	1	sp|O94906|PRP6_HUMAN	sp|Q6P2Q9|PRP8_HUMAN	PRPF6_3	PRPF8_674	MoERPKIQQQFSDLK	TVTKQR	PRPF6_3-PRPF8_674	3	674
5644-1-11-1-16-1	L1_20190826_HS_1023_FU_CL1_5.mgf	21517	4	3900.96	1	LEEVTGKLQVAR	7	318	>sp|O94906|PRP6_HUMAN Pre-mRNA-processing factor 6 OS=Homo sapiens GN=PRPF6 PE=1 SV=1,>sp|O94906-2|PRP6_HUMAN Isoform 2 of Pre-mRNA-processing factor 6 OS=Homo sapiens GN=PRPF6	1341.76	5.97e-14	4.1e-32	GYLTDLNSMIPTHGGDINDIKK	21	272	>sp|O94906|PRP6_HUMAN Pre-mRNA-processing factor 6 OS=Homo sapiens GN=PRPF6 PE=1 SV=1,>sp|O94906-2|PRP6_HUMAN Isoform 2 of Pre-mRNA-processing factor 6 OS=Homo sapiens GN=PRPF6	2401.19	1.18e-17	2.31e-30	>sp|O94906|PRP6_HUMAN Pre-mRNA-processing factor 6 OS=Homo sapiens GN=PRPF6 PE=1 SV=1,>sp|O94906-2|PRP6_HUMAN Isoform 2 of Pre-mRNA-processing factor 6 OS=Homo sapiens GN=PRPF6-292->sp|O94906|PRP6_HUMAN Pre-mRNA-processing factor 6 OS=Homo sapiens GN=PRPF6 PE=1 SV=1,>sp|O94906-2|PRP6_HUMAN Isoform 2 of Pre-mRNA-processing factor 6 OS=Homo sapiens GN=PRPF6-324	PRPF6	PRPF6	>sp|O94906|PRP6_HUMAN Pre-mRNA-processing factor 6 OS=Homo sapiens GN=PRPF6 PE=1 SV=1	>sp|O94906|PRP6_HUMAN Pre-mRNA-processing factor 6 OS=Homo sapiens GN=PRPF6 PE=1 SV=1	292	324	1	sp|O94906|PRP6_HUMAN	sp|O94906|PRP6_HUMAN	PRPF6_292	PRPF6_324	GYLTDLNSMIPTHGGDINDIKK	LEEVTGKLQVAR	PRPF6_292-PRPF6_324	292	324
2423-1-7-1-11-1	L1_20190826_HS_1023_FU_CL1_4.mgf	12864	4	2327.32	1	LLLKSVR	4	296	>sp|O94906|PRP6_HUMAN Pre-mRNA-processing factor 6 OS=Homo sapiens GN=PRPF6 PE=1 SV=1,>sp|O94906-2|PRP6_HUMAN Isoform 2 of Pre-mRNA-processing factor 6 OS=Homo sapiens GN=PRPF6	827.559	2.06e-07	1.75e-14	LEEVTGKLQVAR	7	318	>sp|O94906|PRP6_HUMAN Pre-mRNA-processing factor 6 OS=Homo sapiens GN=PRPF6 PE=1 SV=1,>sp|O94906-2|PRP6_HUMAN Isoform 2 of Pre-mRNA-processing factor 6 OS=Homo sapiens GN=PRPF6	1341.76	3.52e-24	3.87e-31	>sp|O94906|PRP6_HUMAN Pre-mRNA-processing factor 6 OS=Homo sapiens GN=PRPF6 PE=1 SV=1,>sp|O94906-2|PRP6_HUMAN Isoform 2 of Pre-mRNA-processing factor 6 OS=Homo sapiens GN=PRPF6-299->sp|O94906|PRP6_HUMAN Pre-mRNA-processing factor 6 OS=Homo sapiens GN=PRPF6 PE=1 SV=1,>sp|O94906-2|PRP6_HUMAN Isoform 2 of Pre-mRNA-processing factor 6 OS=Homo sapiens GN=PRPF6-324	PRPF6	PRPF6	>sp|O94906|PRP6_HUMAN Pre-mRNA-processing factor 6 OS=Homo sapiens GN=PRPF6 PE=1 SV=1	>sp|O94906|PRP6_HUMAN Pre-mRNA-processing factor 6 OS=Homo sapiens GN=PRPF6 PE=1 SV=1	299	324	1	sp|O94906|PRP6_HUMAN	sp|O94906|PRP6_HUMAN	PRPF6_299	PRPF6_324	LLLKSVR	LEEVTGKLQVAR	PRPF6_299-PRPF6_324	299	324
4899-1-11-1-61-1	L1_20190826_HS_1023_FU_CL1_7.mgf	18259	4	2798.35	1	AAYFEKNHGTR	6	580	>sp|O94906|PRP6_HUMAN Pre-mRNA-processing factor 6 OS=Homo sapiens GN=PRPF6 PE=1 SV=1,>sp|O94906-2|PRP6_HUMAN Isoform 2 of Pre-mRNA-processing factor 6 OS=Homo sapiens GN=PRPF6	1292.63	1	4.1e-12	AEVLWLMoGAKSK	10	607	>sp|O94906|PRP6_HUMAN Pre-mRNA-processing factor 6 OS=Homo sapiens GN=PRPF6 PE=1 SV=1,>sp|O94906-2|PRP6_HUMAN Isoform 2 of Pre-mRNA-processing factor 6 OS=Homo sapiens GN=PRPF6	1347.72	1.02e-29	1.27e-39	>sp|O94906|PRP6_HUMAN Pre-mRNA-processing factor 6 OS=Homo sapiens GN=PRPF6 PE=1 SV=1,>sp|O94906-2|PRP6_HUMAN Isoform 2 of Pre-mRNA-processing factor 6 OS=Homo sapiens GN=PRPF6-585->sp|O94906|PRP6_HUMAN Pre-mRNA-processing factor 6 OS=Homo sapiens GN=PRPF6 PE=1 SV=1,>sp|O94906-2|PRP6_HUMAN Isoform 2 of Pre-mRNA-processing factor 6 OS=Homo sapiens GN=PRPF6-616	PRPF6	PRPF6	>sp|O94906|PRP6_HUMAN Pre-mRNA-processing factor 6 OS=Homo sapiens GN=PRPF6 PE=1 SV=1	>sp|O94906|PRP6_HUMAN Pre-mRNA-processing factor 6 OS=Homo sapiens GN=PRPF6 PE=1 SV=1	585	8	1	sp|O94906|PRP6_HUMAN	sp|O94906|PRP6_HUMAN	PRPF6_585	PRPF6_8	AAYFEKNHGTR	AEVLWLMoGAKSK	PRPF6_585-PRPF6_8	585	8
7078-1-1-1-5-1	L1_20190826_HS_1023_FU_CL1_6.mgf	25689	4	2347.14	1	GGGKGR	4	182	>sp|O95400|CD2B2_HUMAN CD2 antigen cytoplasmic tail-binding protein 2 OS=Homo sapiens GN=CD2BP2 PE=1 SV=1,>sp|O95400|CD2B2	530.292	1	1.4e-11	DSWLDNIDWVKIR	11	117	>sp|O95400|CD2B2_HUMAN CD2 antigen cytoplasmic tail-binding protein 2 OS=Homo sapiens GN=CD2BP2 PE=1 SV=1,>sp|O95400|CD2B2	1658.84	5.89e-34	3.77e-41	>sp|O95400|CD2B2_HUMAN CD2 antigen cytoplasmic tail-binding protein 2 OS=Homo sapiens GN=CD2BP2 PE=1 SV=1,>sp|O95400|CD2B2-127->sp|O95400|CD2B2_HUMAN CD2 antigen cytoplasmic tail-binding protein 2 OS=Homo sapiens GN=CD2BP2 PE=1 SV=1,>sp|O95400|CD2B2-185	CD2BP2	CD2BP2	>sp|O95400|CD2B2_HUMAN CD2 antigen cytoplasmic tail-binding protein 2 OS=Homo sapiens GN=CD2BP2 PE=1 SV=1	>sp|O95400|CD2B2_HUMAN CD2 antigen cytoplasmic tail-binding protein 2 OS=Homo sapiens GN=CD2BP2 PE=1 SV=1	127	185	1	sp|O95400|CD2B2_HUMAN	sp|O95400|CD2B2_HUMAN	CD2BP2_127	CD2BP2_185	DSWLDNIDWVKIR	GGGKGR	CD2BP2_127-CD2BP2_185	127	185
4833-1-6-1-6-1	L1_20190826_HS_1023_FU_CL1_4.mgf	20260	4	2954.43	1	KGPGQPSSPQR	1	188	>sp|O95400|CD2B2_HUMAN CD2 antigen cytoplasmic tail-binding protein 2 OS=Homo sapiens GN=CD2BP2 PE=1 SV=1,>sp|O95400|CD2B2	1137.59	3.64e-07	8.14e-21	DSWLDNIDWVKIR	11	117	>sp|O95400|CD2B2_HUMAN CD2 antigen cytoplasmic tail-binding protein 2 OS=Homo sapiens GN=CD2BP2 PE=1 SV=1,>sp|O95400|CD2B2	1658.84	2.8e-28	1.39e-37	>sp|O95400|CD2B2_HUMAN CD2 antigen cytoplasmic tail-binding protein 2 OS=Homo sapiens GN=CD2BP2 PE=1 SV=1,>sp|O95400|CD2B2-127->sp|O95400|CD2B2_HUMAN CD2 antigen cytoplasmic tail-binding protein 2 OS=Homo sapiens GN=CD2BP2 PE=1 SV=1,>sp|O95400|CD2B2-188	CD2BP2	CD2BP2	>sp|O95400|CD2B2_HUMAN CD2 antigen cytoplasmic tail-binding protein 2 OS=Homo sapiens GN=CD2BP2 PE=1 SV=1	>sp|O95400|CD2B2_HUMAN CD2 antigen cytoplasmic tail-binding protein 2 OS=Homo sapiens GN=CD2BP2 PE=1 SV=1	127	188	1	sp|O95400|CD2B2_HUMAN	sp|O95400|CD2B2_HUMAN	CD2BP2_127	CD2BP2_188	DSWLDNIDWVKIR	KGPGQPSSPQR	CD2BP2_127-CD2BP2_188	127	188
5144-1-10-1-5-1	L1_20190826_HS_1023_FU_CL1_4.mgf	21139	4	3212.6	3	KLVDPVAGSGGPGSR	1	26	>sp|O95400|CD2B2_HUMAN CD2 antigen cytoplasmic tail-binding protein 2 OS=Homo sapiens GN=CD2BP2 PE=1 SV=1,>sp|O95400|CD2B2	1395.75	1.94e-18	3.27e-27	DSWLDNIDWVKIR	11	117	>sp|O95400|CD2B2_HUMAN CD2 antigen cytoplasmic tail-binding protein 2 OS=Homo sapiens GN=CD2BP2 PE=1 SV=1,>sp|O95400|CD2B2	1658.84	0.000849595	5.21e-14	>sp|O95400|CD2B2_HUMAN CD2 antigen cytoplasmic tail-binding protein 2 OS=Homo sapiens GN=CD2BP2 PE=1 SV=1,>sp|O95400|CD2B2-127->sp|O95400|CD2B2_HUMAN CD2 antigen cytoplasmic tail-binding protein 2 OS=Homo sapiens GN=CD2BP2 PE=1 SV=1,>sp|O95400|CD2B2-26	CD2BP2	CD2BP2	>sp|O95400|CD2B2_HUMAN CD2 antigen cytoplasmic tail-binding protein 2 OS=Homo sapiens GN=CD2BP2 PE=1 SV=1	>sp|O95400|CD2B2_HUMAN CD2 antigen cytoplasmic tail-binding protein 2 OS=Homo sapiens GN=CD2BP2 PE=1 SV=1	127	26	1	sp|O95400|CD2B2_HUMAN	sp|O95400|CD2B2_HUMAN	CD2BP2_127	CD2BP2_26	DSWLDNIDWVKIR	KLVDPVAGSGGPGSR	CD2BP2_127-CD2BP2_26	127	26
1930-1-1-1-4-1	L1_20190826_HS_1023_FU_CL1_4.mgf	11063	4	2934.39	2	GGGKGR	4	182	>sp|O95400|CD2B2_HUMAN CD2 antigen cytoplasmic tail-binding protein 2 OS=Homo sapiens GN=CD2BP2 PE=1 SV=1,>sp|O95400|CD2B2	530.292	1	3.81e-11	VTFQGVGDEEDEDEIIVPKK	19	6	>sp|O95400|CD2B2_HUMAN CD2 antigen cytoplasmic tail-binding protein 2 OS=Homo sapiens GN=CD2BP2 PE=1 SV=1,>sp|O95400|CD2B2	2246.1	1.65e-40	3.76e-54	>sp|O95400|CD2B2_HUMAN CD2 antigen cytoplasmic tail-binding protein 2 OS=Homo sapiens GN=CD2BP2 PE=1 SV=1,>sp|O95400|CD2B2-185->sp|O95400|CD2B2_HUMAN CD2 antigen cytoplasmic tail-binding protein 2 OS=Homo sapiens GN=CD2BP2 PE=1 SV=1,>sp|O95400|CD2B2-24	CD2BP2	CD2BP2	>sp|O95400|CD2B2_HUMAN CD2 antigen cytoplasmic tail-binding protein 2 OS=Homo sapiens GN=CD2BP2 PE=1 SV=1	>sp|O95400|CD2B2_HUMAN CD2 antigen cytoplasmic tail-binding protein 2 OS=Homo sapiens GN=CD2BP2 PE=1 SV=1	185	24	1	sp|O95400|CD2B2_HUMAN	sp|O95400|CD2B2_HUMAN	CD2BP2_185	CD2BP2_24	GGGKGR	VTFQGVGDEEDEDEIIVPKK	CD2BP2_185-CD2BP2_24	185	24
1727-1-1-1-10-1	L1_20190826_HS_1023_FU_CL1_7.mgf	8114	4	2212.14	2	GGGKGR	4	182	>sp|O95400|CD2B2_HUMAN CD2 antigen cytoplasmic tail-binding protein 2 OS=Homo sapiens GN=CD2BP2 PE=1 SV=1,>sp|O95400|CD2B2	530.292	1	4.9e-11	KKLVDPVAGSGGPGSR	2	25	>sp|O95400|CD2B2_HUMAN CD2 antigen cytoplasmic tail-binding protein 2 OS=Homo sapiens GN=CD2BP2 PE=1 SV=1,>sp|O95400|CD2B2	1523.84	1.14e-26	3.51e-38	>sp|O95400|CD2B2_HUMAN CD2 antigen cytoplasmic tail-binding protein 2 OS=Homo sapiens GN=CD2BP2 PE=1 SV=1,>sp|O95400|CD2B2-185->sp|O95400|CD2B2_HUMAN CD2 antigen cytoplasmic tail-binding protein 2 OS=Homo sapiens GN=CD2BP2 PE=1 SV=1,>sp|O95400|CD2B2-26	CD2BP2	CD2BP2	>sp|O95400|CD2B2_HUMAN CD2 antigen cytoplasmic tail-binding protein 2 OS=Homo sapiens GN=CD2BP2 PE=1 SV=1	>sp|O95400|CD2B2_HUMAN CD2 antigen cytoplasmic tail-binding protein 2 OS=Homo sapiens GN=CD2BP2 PE=1 SV=1	185	26	1	sp|O95400|CD2B2_HUMAN	sp|O95400|CD2B2_HUMAN	CD2BP2_185	CD2BP2_26	GGGKGR	KKLVDPVAGSGGPGSR	CD2BP2_185-CD2BP2_26	185	26
2697-1-1-1-7-1	L1_20190826_HS_1023_FU_CL1_7.mgf	11346	4	2138.02	4	GGGKGR	4	182	>sp|O95400|CD2B2_HUMAN CD2 antigen cytoplasmic tail-binding protein 2 OS=Homo sapiens GN=CD2BP2 PE=1 SV=1,>sp|O95400|CD2B2	530.292	1	4.23e-12	KLDPPGGQFYNSK	1	321	>sp|O95400|CD2B2_HUMAN CD2 antigen cytoplasmic tail-binding protein 2 OS=Homo sapiens GN=CD2BP2 PE=1 SV=1,>sp|O95400|CD2B2	1449.73	4.15e-36	2.05e-48	>sp|O95400|CD2B2_HUMAN CD2 antigen cytoplasmic tail-binding protein 2 OS=Homo sapiens GN=CD2BP2 PE=1 SV=1,>sp|O95400|CD2B2-185->sp|O95400|CD2B2_HUMAN CD2 antigen cytoplasmic tail-binding protein 2 OS=Homo sapiens GN=CD2BP2 PE=1 SV=1,>sp|O95400|CD2B2-321	CD2BP2	CD2BP2	>sp|O95400|CD2B2_HUMAN CD2 antigen cytoplasmic tail-binding protein 2 OS=Homo sapiens GN=CD2BP2 PE=1 SV=1	>sp|O95400|CD2B2_HUMAN CD2 antigen cytoplasmic tail-binding protein 2 OS=Homo sapiens GN=CD2BP2 PE=1 SV=1	185	321	1	sp|O95400|CD2B2_HUMAN	sp|O95400|CD2B2_HUMAN	CD2BP2_185	CD2BP2_321	GGGKGR	KLDPPGGQFYNSK	CD2BP2_185-CD2BP2_321	185	321
700-1-6-1-6-1	L1_20190826_HS_1023_FU_CL1_5.mgf	4900	4	2433.18	2	KGPGQPSSPQR	1	188	>sp|O95400|CD2B2_HUMAN CD2 antigen cytoplasmic tail-binding protein 2 OS=Homo sapiens GN=CD2BP2 PE=1 SV=1,>sp|O95400|CD2B2	1137.59	6.11e-07	6.61e-17	KGPGQPSSPQR	1	188	>sp|O95400|CD2B2_HUMAN CD2 antigen cytoplasmic tail-binding protein 2 OS=Homo sapiens GN=CD2BP2 PE=1 SV=1,>sp|O95400|CD2B2	1137.59	6.11e-07	6.61e-17	>sp|O95400|CD2B2_HUMAN CD2 antigen cytoplasmic tail-binding protein 2 OS=Homo sapiens GN=CD2BP2 PE=1 SV=1,>sp|O95400|CD2B2-188->sp|O95400|CD2B2_HUMAN CD2 antigen cytoplasmic tail-binding protein 2 OS=Homo sapiens GN=CD2BP2 PE=1 SV=1,>sp|O95400|CD2B2-188	CD2BP2	CD2BP2	>sp|O95400|CD2B2_HUMAN CD2 antigen cytoplasmic tail-binding protein 2 OS=Homo sapiens GN=CD2BP2 PE=1 SV=1	>sp|O95400|CD2B2_HUMAN CD2 antigen cytoplasmic tail-binding protein 2 OS=Homo sapiens GN=CD2BP2 PE=1 SV=1	188	188	1	sp|O95400|CD2B2_HUMAN	sp|O95400|CD2B2_HUMAN	CD2BP2_188	CD2BP2_188	KGPGQPSSPQR	KGPGQPSSPQR	CD2BP2_188-CD2BP2_188	188	188
2114-1-6-1-12-1	L1_20190826_HS_1023_FU_CL1_7.mgf	9373	4	2819.43	3	KGPGQPSSPQR	1	188	>sp|O95400|CD2B2_HUMAN CD2 antigen cytoplasmic tail-binding protein 2 OS=Homo sapiens GN=CD2BP2 PE=1 SV=1,>sp|O95400|CD2B2	1137.59	6.23e-12	1.51e-21	KKLVDPVAGSGGPGSR	2	25	>sp|O95400|CD2B2_HUMAN CD2 antigen cytoplasmic tail-binding protein 2 OS=Homo sapiens GN=CD2BP2 PE=1 SV=1,>sp|O95400|CD2B2	1523.84	1.41e-23	1.02e-36	>sp|O95400|CD2B2_HUMAN CD2 antigen cytoplasmic tail-binding protein 2 OS=Homo sapiens GN=CD2BP2 PE=1 SV=1,>sp|O95400|CD2B2-188->sp|O95400|CD2B2_HUMAN CD2 antigen cytoplasmic tail-binding protein 2 OS=Homo sapiens GN=CD2BP2 PE=1 SV=1,>sp|O95400|CD2B2-26	CD2BP2	CD2BP2	>sp|O95400|CD2B2_HUMAN CD2 antigen cytoplasmic tail-binding protein 2 OS=Homo sapiens GN=CD2BP2 PE=1 SV=1	>sp|O95400|CD2B2_HUMAN CD2 antigen cytoplasmic tail-binding protein 2 OS=Homo sapiens GN=CD2BP2 PE=1 SV=1	188	26	1	sp|O95400|CD2B2_HUMAN	sp|O95400|CD2B2_HUMAN	CD2BP2_188	CD2BP2_26	KGPGQPSSPQR	KKLVDPVAGSGGPGSR	CD2BP2_188-CD2BP2_26	188	26
2479-2-6-1-7-1	L1_20190826_HS_1023_FU_CL1_5.mgf	10838	4	2745.31	2	KGPGQPSSPQR	1	188	>sp|O95400|CD2B2_HUMAN CD2 antigen cytoplasmic tail-binding protein 2 OS=Homo sapiens GN=CD2BP2 PE=1 SV=1,>sp|O95400|CD2B2	1137.59	1.26e-17	5.08e-29	KLDPPGGQFYNSK	1	321	>sp|O95400|CD2B2_HUMAN CD2 antigen cytoplasmic tail-binding protein 2 OS=Homo sapiens GN=CD2BP2 PE=1 SV=1,>sp|O95400|CD2B2	1449.73	4.8e-35	2.79e-55	>sp|O95400|CD2B2_HUMAN CD2 antigen cytoplasmic tail-binding protein 2 OS=Homo sapiens GN=CD2BP2 PE=1 SV=1,>sp|O95400|CD2B2-188->sp|O95400|CD2B2_HUMAN CD2 antigen cytoplasmic tail-binding protein 2 OS=Homo sapiens GN=CD2BP2 PE=1 SV=1,>sp|O95400|CD2B2-321	CD2BP2	CD2BP2	>sp|O95400|CD2B2_HUMAN CD2 antigen cytoplasmic tail-binding protein 2 OS=Homo sapiens GN=CD2BP2 PE=1 SV=1	>sp|O95400|CD2B2_HUMAN CD2 antigen cytoplasmic tail-binding protein 2 OS=Homo sapiens GN=CD2BP2 PE=1 SV=1	188	321	1	sp|O95400|CD2B2_HUMAN	sp|O95400|CD2B2_HUMAN	CD2BP2_188	CD2BP2_321	KGPGQPSSPQR	KLDPPGGQFYNSK	CD2BP2_188-CD2BP2_321	188	321
2644-1-6-1-12-1	L1_20190826_HS_1023_FU_CL1_7.mgf	11151	4	2902.42	1	KGPGQPSSPQR	1	188	>sp|O95400|CD2B2_HUMAN CD2 antigen cytoplasmic tail-binding protein 2 OS=Homo sapiens GN=CD2BP2 PE=1 SV=1,>sp|O95400|CD2B2	1137.59	3.14e-08	1.46e-16	KLDPPGGQFYNSKR	13	321	>sp|O95400|CD2B2_HUMAN CD2 antigen cytoplasmic tail-binding protein 2 OS=Homo sapiens GN=CD2BP2 PE=1 SV=1,>sp|O95400|CD2B2	1605.83	1	2.52e-21	>sp|O95400|CD2B2_HUMAN CD2 antigen cytoplasmic tail-binding protein 2 OS=Homo sapiens GN=CD2BP2 PE=1 SV=1,>sp|O95400|CD2B2-188->sp|O95400|CD2B2_HUMAN CD2 antigen cytoplasmic tail-binding protein 2 OS=Homo sapiens GN=CD2BP2 PE=1 SV=1,>sp|O95400|CD2B2-333	CD2BP2	CD2BP2	>sp|O95400|CD2B2_HUMAN CD2 antigen cytoplasmic tail-binding protein 2 OS=Homo sapiens GN=CD2BP2 PE=1 SV=1	>sp|O95400|CD2B2_HUMAN CD2 antigen cytoplasmic tail-binding protein 2 OS=Homo sapiens GN=CD2BP2 PE=1 SV=1	188	333	1	sp|O95400|CD2B2_HUMAN	sp|O95400|CD2B2_HUMAN	CD2BP2_188	CD2BP2_333	KGPGQPSSPQR	KLDPPGGQFYNSKR	CD2BP2_188-CD2BP2_333	188	333
2302-1-5-1-6-1	L1_20190826_HS_1023_FU_CL1_5.mgf	10180	4	2246.16	2	GGKIPNPIR	3	383	>sp|Q9BUQ8|DDX23_HUMAN Probable ATP-dependent RNA helicase DDX23 OS=Homo sapiens GN=DDX23 PE=1 SV=3	950.566	4.85e-05	2.36e-12	KGPGQPSSPQR	1	188	>sp|O95400|CD2B2_HUMAN CD2 antigen cytoplasmic tail-binding protein 2 OS=Homo sapiens GN=CD2BP2 PE=1 SV=1,>sp|O95400|CD2B2	1137.59	2.35e-08	3.32e-18	>sp|O95400|CD2B2_HUMAN CD2 antigen cytoplasmic tail-binding protein 2 OS=Homo sapiens GN=CD2BP2 PE=1 SV=1,>sp|O95400|CD2B2-188->sp|Q9BUQ8|DDX23_HUMAN Probable ATP-dependent RNA helicase DDX23 OS=Homo sapiens GN=DDX23 PE=1 SV=3-385	CD2BP2	DDX23	>sp|O95400|CD2B2_HUMAN CD2 antigen cytoplasmic tail-binding protein 2 OS=Homo sapiens GN=CD2BP2 PE=1 SV=1	>sp|Q9BUQ8|DDX23_HUMAN Probable ATP-dependent RNA helicase DDX23 OS=Homo sapiens GN=DDX23 PE=1 SV=3	188	385	1	sp|O95400|CD2B2_HUMAN	sp|Q9BUQ8|DDX23_HUMAN	CD2BP2_188	DDX23_385	KGPGQPSSPQR	GGKIPNPIR	CD2BP2_188-DDX23_385	188	385
2993-1-10-1-4-1	L1_20190826_HS_1023_FU_CL1_4.mgf	14678	4	3799.85	1	KLVDPVAGSGGPGSR	1	26	>sp|O95400|CD2B2_HUMAN CD2 antigen cytoplasmic tail-binding protein 2 OS=Homo sapiens GN=CD2BP2 PE=1 SV=1,>sp|O95400|CD2B2	1395.75	9.96e-23	5.6e-42	VTFQGVGDEEDEDEIIVPKK	19	6	>sp|O95400|CD2B2_HUMAN CD2 antigen cytoplasmic tail-binding protein 2 OS=Homo sapiens GN=CD2BP2 PE=1 SV=1,>sp|O95400|CD2B2	2246.1	2.03e-38	6.97e-56	>sp|O95400|CD2B2_HUMAN CD2 antigen cytoplasmic tail-binding protein 2 OS=Homo sapiens GN=CD2BP2 PE=1 SV=1,>sp|O95400|CD2B2-24->sp|O95400|CD2B2_HUMAN CD2 antigen cytoplasmic tail-binding protein 2 OS=Homo sapiens GN=CD2BP2 PE=1 SV=1,>sp|O95400|CD2B2-26	CD2BP2	CD2BP2	>sp|O95400|CD2B2_HUMAN CD2 antigen cytoplasmic tail-binding protein 2 OS=Homo sapiens GN=CD2BP2 PE=1 SV=1	>sp|O95400|CD2B2_HUMAN CD2 antigen cytoplasmic tail-binding protein 2 OS=Homo sapiens GN=CD2BP2 PE=1 SV=1	24	26	1	sp|O95400|CD2B2_HUMAN	sp|O95400|CD2B2_HUMAN	CD2BP2_24	CD2BP2_26	VTFQGVGDEEDEDEIIVPKK	KLVDPVAGSGGPGSR	CD2BP2_24-CD2BP2_26	24	26
1315-1-7-1-4-1	L1_20190826_HS_1023_FU_CL1_3.mgf	10980	4	3854.83	1	KLDPPGGQFYNSK	1	321	>sp|O95400|CD2B2_HUMAN CD2 antigen cytoplasmic tail-binding protein 2 OS=Homo sapiens GN=CD2BP2 PE=1 SV=1,>sp|O95400|CD2B2	1449.73	1.58e-08	1.31e-27	VTFQGVGDEEDEDEIIVPKK	19	6	>sp|O95400|CD2B2_HUMAN CD2 antigen cytoplasmic tail-binding protein 2 OS=Homo sapiens GN=CD2BP2 PE=1 SV=1,>sp|O95400|CD2B2	2246.1	9.99e-15	5.46e-23	>sp|O95400|CD2B2_HUMAN CD2 antigen cytoplasmic tail-binding protein 2 OS=Homo sapiens GN=CD2BP2 PE=1 SV=1,>sp|O95400|CD2B2-24->sp|O95400|CD2B2_HUMAN CD2 antigen cytoplasmic tail-binding protein 2 OS=Homo sapiens GN=CD2BP2 PE=1 SV=1,>sp|O95400|CD2B2-321	CD2BP2	CD2BP2	>sp|O95400|CD2B2_HUMAN CD2 antigen cytoplasmic tail-binding protein 2 OS=Homo sapiens GN=CD2BP2 PE=1 SV=1	>sp|O95400|CD2B2_HUMAN CD2 antigen cytoplasmic tail-binding protein 2 OS=Homo sapiens GN=CD2BP2 PE=1 SV=1	24	321	1	sp|O95400|CD2B2_HUMAN	sp|O95400|CD2B2_HUMAN	CD2BP2_24	CD2BP2_321	VTFQGVGDEEDEDEIIVPKK	KLDPPGGQFYNSK	CD2BP2_24-CD2BP2_321	24	321
1846-1-10-1-7-1	L1_20190826_HS_1023_FU_CL1_4.mgf	10781	4	3003.47	4	KLVDPVAGSGGPGSR	1	26	>sp|O95400|CD2B2_HUMAN CD2 antigen cytoplasmic tail-binding protein 2 OS=Homo sapiens GN=CD2BP2 PE=1 SV=1,>sp|O95400|CD2B2	1395.75	3.62e-34	2.88e-41	KLDPPGGQFYNSK	1	321	>sp|O95400|CD2B2_HUMAN CD2 antigen cytoplasmic tail-binding protein 2 OS=Homo sapiens GN=CD2BP2 PE=1 SV=1,>sp|O95400|CD2B2	1449.73	5.26e-17	1.18e-26	>sp|O95400|CD2B2_HUMAN CD2 antigen cytoplasmic tail-binding protein 2 OS=Homo sapiens GN=CD2BP2 PE=1 SV=1,>sp|O95400|CD2B2-26->sp|O95400|CD2B2_HUMAN CD2 antigen cytoplasmic tail-binding protein 2 OS=Homo sapiens GN=CD2BP2 PE=1 SV=1,>sp|O95400|CD2B2-321	CD2BP2	CD2BP2	>sp|O95400|CD2B2_HUMAN CD2 antigen cytoplasmic tail-binding protein 2 OS=Homo sapiens GN=CD2BP2 PE=1 SV=1	>sp|O95400|CD2B2_HUMAN CD2 antigen cytoplasmic tail-binding protein 2 OS=Homo sapiens GN=CD2BP2 PE=1 SV=1	26	321	1	sp|O95400|CD2B2_HUMAN	sp|O95400|CD2B2_HUMAN	CD2BP2_26	CD2BP2_321	KLVDPVAGSGGPGSR	KLDPPGGQFYNSK	CD2BP2_26-CD2BP2_321	26	321
4176-1-10-1-13-1	L1_20190826_HS_1023_FU_CL1_7.mgf	16057	4	3159.58	2	KLVDPVAGSGGPGSR	1	26	>sp|O95400|CD2B2_HUMAN CD2 antigen cytoplasmic tail-binding protein 2 OS=Homo sapiens GN=CD2BP2 PE=1 SV=1,>sp|O95400|CD2B2	1395.75	2.92e-28	6.94e-45	KLDPPGGQFYNSKR	13	321	>sp|O95400|CD2B2_HUMAN CD2 antigen cytoplasmic tail-binding protein 2 OS=Homo sapiens GN=CD2BP2 PE=1 SV=1,>sp|O95400|CD2B2	1605.83	0.206021	9.66e-14	>sp|O95400|CD2B2_HUMAN CD2 antigen cytoplasmic tail-binding protein 2 OS=Homo sapiens GN=CD2BP2 PE=1 SV=1,>sp|O95400|CD2B2-26->sp|O95400|CD2B2_HUMAN CD2 antigen cytoplasmic tail-binding protein 2 OS=Homo sapiens GN=CD2BP2 PE=1 SV=1,>sp|O95400|CD2B2-333	CD2BP2	CD2BP2	>sp|O95400|CD2B2_HUMAN CD2 antigen cytoplasmic tail-binding protein 2 OS=Homo sapiens GN=CD2BP2 PE=1 SV=1	>sp|O95400|CD2B2_HUMAN CD2 antigen cytoplasmic tail-binding protein 2 OS=Homo sapiens GN=CD2BP2 PE=1 SV=1	26	333	1	sp|O95400|CD2B2_HUMAN	sp|O95400|CD2B2_HUMAN	CD2BP2_26	CD2BP2_333	KLVDPVAGSGGPGSR	KLDPPGGQFYNSKR	CD2BP2_26-CD2BP2_333	26	333
3072-1-12-1-12-1	L1_20190826_HS_1023_FU_CL1_7.mgf	12567	5	3370.59	2	KLDPPGGQFYNSKR	13	321	>sp|O95400|CD2B2_HUMAN CD2 antigen cytoplasmic tail-binding protein 2 OS=Homo sapiens GN=CD2BP2 PE=1 SV=1,>sp|O95400|CD2B2	1605.83	1	7.13e-15	KLDPPGGQFYNSKR	13	321	>sp|O95400|CD2B2_HUMAN CD2 antigen cytoplasmic tail-binding protein 2 OS=Homo sapiens GN=CD2BP2 PE=1 SV=1,>sp|O95400|CD2B2	1605.83	1	7.13e-15	>sp|O95400|CD2B2_HUMAN CD2 antigen cytoplasmic tail-binding protein 2 OS=Homo sapiens GN=CD2BP2 PE=1 SV=1,>sp|O95400|CD2B2-333->sp|O95400|CD2B2_HUMAN CD2 antigen cytoplasmic tail-binding protein 2 OS=Homo sapiens GN=CD2BP2 PE=1 SV=1,>sp|O95400|CD2B2-333	CD2BP2	CD2BP2	>sp|O95400|CD2B2_HUMAN CD2 antigen cytoplasmic tail-binding protein 2 OS=Homo sapiens GN=CD2BP2 PE=1 SV=1	>sp|O95400|CD2B2_HUMAN CD2 antigen cytoplasmic tail-binding protein 2 OS=Homo sapiens GN=CD2BP2 PE=1 SV=1	333	333	1	sp|O95400|CD2B2_HUMAN	sp|O95400|CD2B2_HUMAN	CD2BP2_333	CD2BP2_333	KLDPPGGQFYNSKR	KLDPPGGQFYNSKR	CD2BP2_333-CD2BP2_333	333	333
667-1-2-1-4-1	L1_20190826_HS_1023_FU_CL1_5.mgf	4797	4	1802.92	2	VEAKLR	4	201	>sp|P05455|LA_HUMAN Lupus La protein OS=Homo sapiens GN=SSB PE=1 SV=2	714.439	1.85e-05	6.21e-12	AKQEQEAK	2	207	>sp|P05455|LA_HUMAN Lupus La protein OS=Homo sapiens GN=SSB PE=1 SV=2	930.477	3.4e-19	8.48e-26	>sp|P05455|LA_HUMAN Lupus La protein OS=Homo sapiens GN=SSB PE=1 SV=2-204->sp|P05455|LA_HUMAN Lupus La protein OS=Homo sapiens GN=SSB PE=1 SV=2-208	SSB	SSB	>sp|P05455|LA_HUMAN Lupus La protein OS=Homo sapiens GN=SSB PE=1 SV=2	>sp|P05455|LA_HUMAN Lupus La protein OS=Homo sapiens GN=SSB PE=1 SV=2	204	208	0	sp|P05455|LA_HUMAN	sp|P05455|LA_HUMAN	SSB_204	SSB_208	VEAKLR	AKQEQEAK	SSB_204-SSB_208	204	208
1127-1-3-1-8-1	L1_20190826_HS_1023_FU_CL1_4.mgf	7242	4	2435.19	1	AKMoQASIEK	2	220	>sp|P06748-2|NPM_HUMAN Isoform 2 of Nucleophosmin OS=Homo sapiens GN=NPM1,>sp|P06748|NPM_HUMAN Nucleophosmin OS=Homo sapiens GN=NPM1 PE=1 SV=2,>sp|P06748-3|NPM_HUMAN Isoform 3 of Nucleophosmin OS=Homo sapiens GN=NPM1	1020.53	1	1.67e-11	TPKGPSSVEDIK	3	208	>sp|P06748-2|NPM_HUMAN Isoform 2 of Nucleophosmin OS=Homo sapiens GN=NPM1,>sp|P06748|NPM_HUMAN Nucleophosmin OS=Homo sapiens GN=NPM1 PE=1 SV=2,>sp|P06748-3|NPM_HUMAN Isoform 3 of Nucleophosmin OS=Homo sapiens GN=NPM1	1256.66	0.169629	9.77e-14	>sp|P06748-2|NPM_HUMAN Isoform 2 of Nucleophosmin OS=Homo sapiens GN=NPM1,>sp|P06748|NPM_HUMAN Nucleophosmin OS=Homo sapiens GN=NPM1 PE=1 SV=2,>sp|P06748-3|NPM_HUMAN Isoform 3 of Nucleophosmin OS=Homo sapiens GN=NPM1-210->sp|P06748-2|NPM_HUMAN Isoform 2 of Nucleophosmin OS=Homo sapiens GN=NPM1,>sp|P06748|NPM_HUMAN Nucleophosmin OS=Homo sapiens GN=NPM1 PE=1 SV=2,>sp|P06748-3|NPM_HUMAN Isoform 3 of…	NPM1	NPM1	>sp|P06748-2|NPM_HUMAN Isoform 2 of Nucleophosmin OS=Homo sapiens GN=NPM1	>sp|P06748-2|NPM_HUMAN Isoform 2 of Nucleophosmin OS=Homo sapiens GN=NPM1	0	210	1	sp|P06748-2|NPM_HUMAN	sp|P06748-2|NPM_HUMAN	NPM1_0	NPM1_210	AKMoQASIEK	TPKGPSSVEDIK	NPM1_0-NPM1_210	0	210
167-1-3-1-50-1	L1_20190826_HS_1023_FU_CL1_6.mgf	3540	5	2732.27	1	DTPAKNAQK	5	198	>sp|P06748|NPM_HUMAN Nucleophosmin OS=Homo sapiens GN=NPM1 PE=1 SV=2,>sp|P06748-3|NPM_HUMAN Isoform 3 of Nucleophosmin OS=Homo sapiens GN=NPM1	971.504	2.39e-14	2.86e-22	SNQNGKDSKPSSTPR	6	207	>sp|P06748|NPM_HUMAN Nucleophosmin OS=Homo sapiens GN=NPM1 PE=1 SV=2,>sp|P06748-3|NPM_HUMAN Isoform 3 of Nucleophosmin OS=Homo sapiens GN=NPM1	1601.78	1.98e-14	2.05e-25	>sp|P06748|NPM_HUMAN Nucleophosmin OS=Homo sapiens GN=NPM1 PE=1 SV=2,>sp|P06748-3|NPM_HUMAN Isoform 3 of Nucleophosmin OS=Homo sapiens GN=NPM1-202->sp|P06748|NPM_HUMAN Nucleophosmin OS=Homo sapiens GN=NPM1 PE=1 SV=2,>sp|P06748-3|NPM_HUMAN Isoform 3 of Nucleophosmin OS=Homo sapiens GN=NPM1-212	NPM1	NPM1	>sp|P06748|NPM_HUMAN Nucleophosmin OS=Homo sapiens GN=NPM1 PE=1 SV=2	>sp|P06748|NPM_HUMAN Nucleophosmin OS=Homo sapiens GN=NPM1 PE=1 SV=2	202	212	1	sp|P06748|NPM_HUMAN	sp|P06748|NPM_HUMAN	NPM1_202	NPM1_212	DTPAKNAQK	SNQNGKDSKPSSTPR	NPM1_202-NPM1_212	202	212
2363-1-13-1-25-1	L1_20190826_HS_1023_FU_CL1_3.mgf	14341	4	3332.72	1	ELISNSSDALDKIR	12	47	>sp|P07900|HS90A_HUMAN Heat shock protein HSP 90-alpha OS=Homo sapiens GN=HSP90AA1 PE=1 SV=5,>sp|P07900-2|HS90A_HUMAN Isoform 2 of Heat shock protein HSP 90-alpha OS=Homo sapiens GN=HSP90AA1	1559.82	1.62e-16	1.61e-29	ADLINNLGTIAKSGTK	12	101	>sp|P07900|HS90A_HUMAN Heat shock protein HSP 90-alpha OS=Homo sapiens GN=HSP90AA1 PE=1 SV=5,>sp|P07900-2|HS90A_HUMAN Isoform 2 of Heat shock protein HSP 90-alpha OS=Homo sapiens GN=HSP90AA1,>sp|P08238|HS90B_HUMAN Heat shock protein HSP 90-beta OS=Homo sapiens GN=HSP90AB1 PE=1 SV=4	1614.89	5.72e-18	5.4e-32	>sp|P07900|HS90A_HUMAN Heat shock protein HSP 90-alpha OS=Homo sapiens GN=HSP90AA1 PE=1 SV=5,>sp|P07900-2|HS90A_HUMAN Isoform 2 of Heat shock protein HSP 90-alpha OS=Homo sapiens GN=HSP90AA1-58->sp|P07900|HS90A_HUMAN Heat shock protein HSP 90-alpha OS=Homo sapiens GN=HSP90AA1 PE=1 SV=5,>sp|P07900-2|HS90A_HUMAN Isoform 2 of Heat shock protein HSP 90-alpha OS=Homo sapiens GN=HSP90AA1,>sp|P08238|HS9…	HSP90AA1	HSP90AA1	>sp|P07900|HS90A_HUMAN Heat shock protein HSP 90-alpha OS=Homo sapiens GN=HSP90AA1 PE=1 SV=5	>sp|P07900|HS90A_HUMAN Heat shock protein HSP 90-alpha OS=Homo sapiens GN=HSP90AA1 PE=1 SV=5	112	58	1	sp|P07900|HS90A_HUMAN	sp|P07900|HS90A_HUMAN	HSP90AA1_112	HSP90AA1_58	ADLINNLGTIAKSGTK	ELISNSSDALDKIR	HSP90AA1_112-HSP90AA1_58	112	58
2626-1-8-1-25-1	L1_20190826_HS_1023_FU_CL1_3.mgf	15177	4	3316.72	1	ELISNASDALDKIR	12	42	>sp|P08238|HS90B_HUMAN Heat shock protein HSP 90-beta OS=Homo sapiens GN=HSP90AB1 PE=1 SV=4,>sp|P14625|ENPL_HUMAN Endoplasmin OS=Homo sapiens GN=HSP90B1 PE=1 SV=1	1543.82	7.04e-20	1.19e-31	ADLINNLGTIAKSGTK	12	101	>sp|P07900|HS90A_HUMAN Heat shock protein HSP 90-alpha OS=Homo sapiens GN=HSP90AA1 PE=1 SV=5,>sp|P07900-2|HS90A_HUMAN Isoform 2 of Heat shock protein HSP 90-alpha OS=Homo sapiens GN=HSP90AA1,>sp|P08238|HS90B_HUMAN Heat shock protein HSP 90-beta OS=Homo sapiens GN=HSP90AB1 PE=1 SV=4	1614.89	4.36e-17	1.59e-30	>sp|P07900|HS90A_HUMAN Heat shock protein HSP 90-alpha OS=Homo sapiens GN=HSP90AA1 PE=1 SV=5,>sp|P07900-2|HS90A_HUMAN Isoform 2 of Heat shock protein HSP 90-alpha OS=Homo sapiens GN=HSP90AA1,>sp|P08238|HS90B_HUMAN Heat shock protein HSP 90-beta OS=Homo sapiens GN=HSP90AB1 PE=1 SV=4-112->sp|P08238|HS90B_HUMAN Heat shock protein HSP 90-beta OS=Homo sapiens GN=HSP90AB1 PE=1 SV=4,>sp|P14625|ENPL_HUMA…	HSP90AA1	HSP90AB1	>sp|P07900|HS90A_HUMAN Heat shock protein HSP 90-alpha OS=Homo sapiens GN=HSP90AA1 PE=1 SV=5	>sp|P08238|HS90B_HUMAN Heat shock protein HSP 90-beta OS=Homo sapiens GN=HSP90AB1 PE=1 SV=4	112	53	1	sp|P07900|HS90A_HUMAN	sp|P08238|HS90B_HUMAN	HSP90AA1_112	HSP90AB1_53	ADLINNLGTIAKSGTK	ELISNASDALDKIR	HSP90AA1_112-HSP90AB1_53	112	53
7164-1-6-1-8-1	L1_20190826_HS_1023_FU_CL1_7.mgf	25611	4	3985.01	1	KKELEEIVQPIISK	2	620	>sp|P11021|GRP78_HUMAN 78 kDa glucose-regulated protein OS=Homo sapiens GN=HSPA5 PE=1 SV=2	1652.97	1	8.72e-18	IEWLESHQDADIEDFKAK	16	602	>sp|P11021|GRP78_HUMAN 78 kDa glucose-regulated protein OS=Homo sapiens GN=HSPA5 PE=1 SV=2	2173.03	1	1.49e-14	>sp|P11021|GRP78_HUMAN 78 kDa glucose-regulated protein OS=Homo sapiens GN=HSPA5 PE=1 SV=2-617->sp|P11021|GRP78_HUMAN 78 kDa glucose-regulated protein OS=Homo sapiens GN=HSPA5 PE=1 SV=2-621	HSPA5	HSPA5	>sp|P11021|GRP78_HUMAN 78 kDa glucose-regulated protein OS=Homo sapiens GN=HSPA5 PE=1 SV=2	>sp|P11021|GRP78_HUMAN 78 kDa glucose-regulated protein OS=Homo sapiens GN=HSPA5 PE=1 SV=2	617	621	0	sp|P11021|GRP78_HUMAN	sp|P11021|GRP78_HUMAN	HSPA5_617	HSPA5_621	IEWLESHQDADIEDFKAK	KKELEEIVQPIISK	HSPA5_617-HSPA5_621	617	621
2563-1-5-1-1-1	L1_20190826_HS_1023_FU_CL1_5.mgf	11220	4	2163.08	1	LSKEDIER	3	510	>sp|P11142|HSP7C_HUMAN Heat shock cognate 71 kDa protein OS=Homo sapiens GN=HSPA8 PE=1 SV=1,>tr|E9PKE3|E9PKE3_HUMAN Heat shock cognate 71 kDa protein OS=Homo sapiens GN=HSPA8 PE=1 SV=1,>tr|E9PNE6|E9PNE6_HUMAN Heat shock cognate 71 kDa protein OS=Homo sapiens GN=HSPA8 PE=1 SV=1	988.519	4.84e-12	2.85e-19	ITITNDKGR	7	502	>tr|A0A0G2JIW1|A0A0G2JIW1_HUMAN Heat shock 70 kDa protein 1B OS=Homo sapiens GN=HSPA1B PE=1 SV=1,>sp|P0DMV9|HS71B_HUMAN Heat shock 70 kDa protein 1B OS=Homo sapiens GN=HSPA1B PE=1 SV=1,>sp|P0DMV8|HS71A_HUMAN Heat shock 70 kDa protein 1A OS=Homo sapiens GN=HSPA1A PE=1 SV=1,>sp|P0DMV8-2|HS71A_HUMAN Isoform 2 of Heat shock 70 kDa protein 1A OS=Homo sapiens GN=HSPA1A,>sp|P11142|HSP7C_HUMAN Heat shock…	1016.56	8.16e-14	7.24e-27	>sp|P11142|HSP7C_HUMAN Heat shock cognate 71 kDa protein OS=Homo sapiens GN=HSPA8 PE=1 SV=1,>tr|E9PKE3|E9PKE3_HUMAN Heat shock cognate 71 kDa protein OS=Homo sapiens GN=HSPA8 PE=1 SV=1,>tr|E9PNE6|E9PNE6_HUMAN Heat shock cognate 71 kDa protein OS=Homo sapiens GN=HSPA8 PE=1 SV=1-512->tr|A0A0G2JIW1|A0A0G2JIW1_HUMAN Heat shock 70 kDa protein 1B OS=Homo sapiens GN=HSPA1B PE=1 SV=1,>sp|P0DMV9|HS71B_HUM…	HSPA1B	HSPA8	>tr|A0A0G2JIW1|A0A0G2JIW1_HUMAN Heat shock 70 kDa protein 1B OS=Homo sapiens GN=HSPA1B PE=1 SV=1	>sp|P11142|HSP7C_HUMAN Heat shock cognate 71 kDa protein OS=Homo sapiens GN=HSPA8 PE=1 SV=1	508	512	1	tr|A0A0G2JIW1|A0A0G2JIW1_HUMAN	sp|P11142|HSP7C_HUMAN	HSPA1B_508	HSPA8_512	ITITNDKGR	LSKEDIER	HSPA1B_508-HSPA8_512	508	512
4209-1-3-1-10-1	L1_20190826_HS_1023_FU_CL1_8.mgf	16256	4	2573.43	1	SKIAHLAGVK	2	1562	>sp|P12270|TPR_HUMAN Nucleoprotein TPR OS=Homo sapiens GN=TPR PE=1 SV=3	1022.62	1	8.71e-11	IAHLAGVKDQLTK	8	1564	>sp|P12270|TPR_HUMAN Nucleoprotein TPR OS=Homo sapiens GN=TPR PE=1 SV=3	1392.81	1.08e-10	2.14e-22	>sp|P12270|TPR_HUMAN Nucleoprotein TPR OS=Homo sapiens GN=TPR PE=1 SV=3-1563->sp|P12270|TPR_HUMAN Nucleoprotein TPR OS=Homo sapiens GN=TPR PE=1 SV=3-1571	TPR	TPR	>sp|P12270|TPR_HUMAN Nucleoprotein TPR OS=Homo sapiens GN=TPR PE=1 SV=3	>sp|P12270|TPR_HUMAN Nucleoprotein TPR OS=Homo sapiens GN=TPR PE=1 SV=3	1563	1571	0	sp|P12270|TPR_HUMAN	sp|P12270|TPR_HUMAN	TPR_1563	TPR_1571	SKIAHLAGVK	IAHLAGVKDQLTK	TPR_1563-TPR_1571	1563	1571
1514-1-9-1-8-1	L1_20190826_HS_1023_FU_CL1_4.mgf	9537	4	2823.44	1	ITALKSQYEGR	5	1599	>sp|P12270|TPR_HUMAN Nucleoprotein TPR OS=Homo sapiens GN=TPR PE=1 SV=3	1264.68	2.94e-13	2.84e-26	QITLKTTPASGER	5	1644	>sp|P12270|TPR_HUMAN Nucleoprotein TPR OS=Homo sapiens GN=TPR PE=1 SV=3	1400.76	1.06e-14	8.38e-25	>sp|P12270|TPR_HUMAN Nucleoprotein TPR OS=Homo sapiens GN=TPR PE=1 SV=3-1603->sp|P12270|TPR_HUMAN Nucleoprotein TPR OS=Homo sapiens GN=TPR PE=1 SV=3-1648	TPR	TPR	>sp|P12270|TPR_HUMAN Nucleoprotein TPR OS=Homo sapiens GN=TPR PE=1 SV=3	>sp|P12270|TPR_HUMAN Nucleoprotein TPR OS=Homo sapiens GN=TPR PE=1 SV=3	1603	1648	0	sp|P12270|TPR_HUMAN	sp|P12270|TPR_HUMAN	TPR_1603	TPR_1648	ITALKSQYEGR	QITLKTTPASGER	TPR_1603-TPR_1648	1603	1648
366-1-9-1-9-1	L1_20190826_HS_1023_FU_CL1_3.mgf	5422	4	3327.55	1	VTAAAMoAGNKSTPR	10	1681	>sp|P12270|TPR_HUMAN Nucleoprotein TPR OS=Homo sapiens GN=TPR PE=1 SV=3	1389.7	1.56e-22	5.96e-42	DEPQEPSNKVPEQQR	9	1629	>sp|P12270|TPR_HUMAN Nucleoprotein TPR OS=Homo sapiens GN=TPR PE=1 SV=3	1779.84	5.02e-12	9.42e-23	>sp|P12270|TPR_HUMAN Nucleoprotein TPR OS=Homo sapiens GN=TPR PE=1 SV=3-1637->sp|P12270|TPR_HUMAN Nucleoprotein TPR OS=Homo sapiens GN=TPR PE=1 SV=3-1690	TPR	TPR	>sp|P12270|TPR_HUMAN Nucleoprotein TPR OS=Homo sapiens GN=TPR PE=1 SV=3	>sp|P12270|TPR_HUMAN Nucleoprotein TPR OS=Homo sapiens GN=TPR PE=1 SV=3	1637	1690	0	sp|P12270|TPR_HUMAN	sp|P12270|TPR_HUMAN	TPR_1637	TPR_1690	DEPQEPSNKVPEQQR	VTAAAMoAGNKSTPR	TPR_1637-TPR_1690	1637	1690
1866-1-4-1-5-1	L1_20190826_HS_1023_FU_CL1_4.mgf	10842	4	2643.35	1	NKELEIAQDR	2	96	>sp|P12270|TPR_HUMAN Nucleoprotein TPR OS=Homo sapiens GN=TPR PE=1 SV=3	1214.63	4.95e-20	3.11e-31	LNNQLKALTEK	6	85	>sp|P12270|TPR_HUMAN Nucleoprotein TPR OS=Homo sapiens GN=TPR PE=1 SV=3	1270.72	3.81e-15	1.46e-24	>sp|P12270|TPR_HUMAN Nucleoprotein TPR OS=Homo sapiens GN=TPR PE=1 SV=3-90->sp|P12270|TPR_HUMAN Nucleoprotein TPR OS=Homo sapiens GN=TPR PE=1 SV=3-97	TPR	TPR	>sp|P12270|TPR_HUMAN Nucleoprotein TPR OS=Homo sapiens GN=TPR PE=1 SV=3	>sp|P12270|TPR_HUMAN Nucleoprotein TPR OS=Homo sapiens GN=TPR PE=1 SV=3	90	97	0	sp|P12270|TPR_HUMAN	sp|P12270|TPR_HUMAN	TPR_90	TPR_97	LNNQLKALTEK	NKELEIAQDR	TPR_90-TPR_97	90	97
4341-1-5-1-11-1	L1_20190826_HS_1023_FU_CL1_4.mgf	18784	4	2793.51	1	EDLYLKPIQR	6	440	>sp|P13639|EF2_HUMAN Elongation factor 2 OS=Homo sapiens GN=EEF2 PE=1 SV=4	1273.7	1.62e-07	5.52e-17	VFSGLVSTGLKVR	11	416	>sp|P13639|EF2_HUMAN Elongation factor 2 OS=Homo sapiens GN=EEF2 PE=1 SV=4	1361.8	4.79e-15	5.81e-31	>sp|P13639|EF2_HUMAN Elongation factor 2 OS=Homo sapiens GN=EEF2 PE=1 SV=4-426->sp|P13639|EF2_HUMAN Elongation factor 2 OS=Homo sapiens GN=EEF2 PE=1 SV=4-445	EEF2	EEF2	>sp|P13639|EF2_HUMAN Elongation factor 2 OS=Homo sapiens GN=EEF2 PE=1 SV=4	>sp|P13639|EF2_HUMAN Elongation factor 2 OS=Homo sapiens GN=EEF2 PE=1 SV=4	426	445	0	sp|P13639|EF2_HUMAN	sp|P13639|EF2_HUMAN	EEF2_426	EEF2_445	VFSGLVSTGLKVR	EDLYLKPIQR	EEF2_426-EEF2_445	426	445
799-1-6-1-2-1	L1_20190826_HS_1023_FU_CL1_5.mgf	5211	4	1569.85	2	KGATPGK	1	110	>sp|P19338|NUCL_HUMAN Nucleolin OS=Homo sapiens GN=NCL PE=1 SV=3	657.381	1.06e-05	9.15e-12	KGAAIPAK	1	125	>sp|P19338|NUCL_HUMAN Nucleolin OS=Homo sapiens GN=NCL PE=1 SV=3	754.47	5.22e-16	7.19e-24	>sp|P19338|NUCL_HUMAN Nucleolin OS=Homo sapiens GN=NCL PE=1 SV=3-110->sp|P19338|NUCL_HUMAN Nucleolin OS=Homo sapiens GN=NCL PE=1 SV=3-125	NCL	NCL	>sp|P19338|NUCL_HUMAN Nucleolin OS=Homo sapiens GN=NCL PE=1 SV=3	>sp|P19338|NUCL_HUMAN Nucleolin OS=Homo sapiens GN=NCL PE=1 SV=3	110	125	0	sp|P19338|NUCL_HUMAN	sp|P19338|NUCL_HUMAN	NCL_110	NCL_125	KGATPGK	KGAAIPAK	NCL_110-NCL_125	110	125
454-1-6-1-2-1	L1_20190826_HS_1023_FU_CL1_4.mgf	4926	4	1787.98	1	AAATSAKK	7	56	>sp|P19338|NUCL_HUMAN Nucleolin OS=Homo sapiens GN=NCL PE=1 SV=3	746.429	1.26e-11	8.8e-18	KVAVATPAK	1	71	>sp|P19338|NUCL_HUMAN Nucleolin OS=Homo sapiens GN=NCL PE=1 SV=3	883.549	3.22e-11	4.44e-19	>sp|P19338|NUCL_HUMAN Nucleolin OS=Homo sapiens GN=NCL PE=1 SV=3-62->sp|P19338|NUCL_HUMAN Nucleolin OS=Homo sapiens GN=NCL PE=1 SV=3-71	NCL	NCL	>sp|P19338|NUCL_HUMAN Nucleolin OS=Homo sapiens GN=NCL PE=1 SV=3	>sp|P19338|NUCL_HUMAN Nucleolin OS=Homo sapiens GN=NCL PE=1 SV=3	62	71	0	sp|P19338|NUCL_HUMAN	sp|P19338|NUCL_HUMAN	NCL_62	NCL_71	AAATSAKK	KVAVATPAK	NCL_62-NCL_71	62	71
971-1-3-1-3-1	L1_20190826_HS_1023_FU_CL1_4.mgf	6619	4	1812.02	2	AAVTPGKK	7	81	>sp|P19338|NUCL_HUMAN Nucleolin OS=Homo sapiens GN=NCL PE=1 SV=3	770.465	2.64e-05	7.42e-12	VAVATPAKK	8	72	>sp|P19338|NUCL_HUMAN Nucleolin OS=Homo sapiens GN=NCL PE=1 SV=3	883.549	4.99e-11	8.42e-20	>sp|P19338|NUCL_HUMAN Nucleolin OS=Homo sapiens GN=NCL PE=1 SV=3-79->sp|P19338|NUCL_HUMAN Nucleolin OS=Homo sapiens GN=NCL PE=1 SV=3-87	NCL	NCL	>sp|P19338|NUCL_HUMAN Nucleolin OS=Homo sapiens GN=NCL PE=1 SV=3	>sp|P19338|NUCL_HUMAN Nucleolin OS=Homo sapiens GN=NCL PE=1 SV=3	79	87	0	sp|P19338|NUCL_HUMAN	sp|P19338|NUCL_HUMAN	NCL_79	NCL_87	VAVATPAKK	AAVTPGKK	NCL_79-NCL_87	79	87
3718-1-3-1-12-1	L1_20190826_HS_1023_FU_CL1_6.mgf	15017	4	3007.61	1	AQSELAAHQKK	10	52	>sp|P25786|PSA1_HUMAN Proteasome subunit alpha type-1 OS=Homo sapiens GN=PSMA1 PE=1 SV=1,>sp|P25786-2|PSA1_HUMAN Isoform Long of Proteasome subunit alpha type-1 OS=Homo sapiens GN=PSMA1,>tr|F5GX11|F5GX11_HUMAN Proteasome subunit alpha type-1 OS=Homo sapiens GN=PSMA1 PE=1 SV=1,>tr|B4DEV8|B4DEV8_HUMAN Proteasome subunit alpha type OS=Homo sapiens PE=2 SV=1	1209.65	1	1.39e-11	LVSLIGSKTQIPTQR	8	108	>sp|P25786|PSA1_HUMAN Proteasome subunit alpha type-1 OS=Homo sapiens GN=PSMA1 PE=1 SV=1,>sp|P25786-2|PSA1_HUMAN Isoform Long of Proteasome subunit alpha type-1 OS=Homo sapiens GN=PSMA1,>tr|F5GX11|F5GX11_HUMAN Proteasome subunit alpha type-1 OS=Homo sapiens GN=PSMA1 PE=1 SV=1	1639.96	8.13e-16	8.13e-16	>sp|P25786|PSA1_HUMAN Proteasome subunit alpha type-1 OS=Homo sapiens GN=PSMA1 PE=1 SV=1,>sp|P25786-2|PSA1_HUMAN Isoform Long of Proteasome subunit alpha type-1 OS=Homo sapiens GN=PSMA1,>tr|F5GX11|F5GX11_HUMAN Proteasome subunit alpha type-1 OS=Homo sapiens GN=PSMA1 PE=1 SV=1-115->sp|P25786|PSA1_HUMAN Proteasome subunit alpha type-1 OS=Homo sapiens GN=PSMA1 PE=1 SV=1,>sp|P25786-2|PSA1_HUMAN Isofo…	PSMA1	PSMA1	>sp|P25786|PSA1_HUMAN Proteasome subunit alpha type-1 OS=Homo sapiens GN=PSMA1 PE=1 SV=1	>sp|P25786|PSA1_HUMAN Proteasome subunit alpha type-1 OS=Homo sapiens GN=PSMA1 PE=1 SV=1	115	61	1	sp|P25786|PSA1_HUMAN	sp|P25786|PSA1_HUMAN	PSMA1_115	PSMA1_61	LVSLIGSKTQIPTQR	AQSELAAHQKK	PSMA1_115-PSMA1_61	115	61
2650-1-4-1-8-1	L1_20190826_HS_1023_FU_CL1_4.mgf	13580	4	3148.6	1	IYKIGQGYLIK	3	284	>sp|P39023|RL3_HUMAN 60S ribosomal protein L3 OS=Homo sapiens GN=RPL3 PE=1 SV=2,>tr|G5E9G0|G5E9G0_HUMAN 60S ribosomal protein L3 OS=Homo sapiens GN=RPL3 PE=1 SV=1,>tr|B5MCW2|B5MCW2_HUMAN 60S ribosomal protein L3 (Fragment) OS=Homo sapiens GN=RPL3 PE=1 SV=1	1294.76	1.33e-15	3.74e-30	LIKNNASTDYDLSDK	3	298	>sp|P39023|RL3_HUMAN 60S ribosomal protein L3 OS=Homo sapiens GN=RPL3 PE=1 SV=2,>tr|G5E9G0|G5E9G0_HUMAN 60S ribosomal protein L3 OS=Homo sapiens GN=RPL3 PE=1 SV=1,>tr|B5MCW2|B5MCW2_HUMAN 60S ribosomal protein L3 (Fragment) OS=Homo sapiens GN=RPL3 PE=1 SV=1	1695.83	2.6e-27	4.43e-41	>sp|P39023|RL3_HUMAN 60S ribosomal protein L3 OS=Homo sapiens GN=RPL3 PE=1 SV=2,>tr|G5E9G0|G5E9G0_HUMAN 60S ribosomal protein L3 OS=Homo sapiens GN=RPL3 PE=1 SV=1,>tr|B5MCW2|B5MCW2_HUMAN 60S ribosomal protein L3 (Fragment) OS=Homo sapiens GN=RPL3 PE=1 SV=1-286->sp|P39023|RL3_HUMAN 60S ribosomal protein L3 OS=Homo sapiens GN=RPL3 PE=1 SV=2,>tr|G5E9G0|G5E9G0_HUMAN 60S ribosomal protein L3 OS=Homo s…	RPL3	RPL3	>sp|P39023|RL3_HUMAN 60S ribosomal protein L3 OS=Homo sapiens GN=RPL3 PE=1 SV=2	>sp|P39023|RL3_HUMAN 60S ribosomal protein L3 OS=Homo sapiens GN=RPL3 PE=1 SV=2	286	300	1	sp|P39023|RL3_HUMAN	sp|P39023|RL3_HUMAN	RPL3_286	RPL3_300	IYKIGQGYLIK	LIKNNASTDYDLSDK	RPL3_286-RPL3_300	286	300
1297-1-8-1-4-1	L1_20190826_HS_1023_FU_CL1_5.mgf	6759	4	1939.96	1	LSQSKASK	5	737	>sp|P55884|EIF3B_HUMAN Eukaryotic translation initiation factor 3 subunit B OS=Homo sapiens GN=EIF3B PE=1 SV=3,>sp|P55884-2|EIF3B_HUMAN Isoform 2 of Eukaryotic translation initiation factor 3 subunit B OS=Homo sapiens GN=EIF3B	847.476	2.63e-05	3.87e-12	IFEQKDR	5	730	>sp|P55884|EIF3B_HUMAN Eukaryotic translation initiation factor 3 subunit B OS=Homo sapiens GN=EIF3B PE=1 SV=3,>sp|P55884-2|EIF3B_HUMAN Isoform 2 of Eukaryotic translation initiation factor 3 subunit B OS=Homo sapiens GN=EIF3B	934.487	1.25e-07	5.59e-14	>sp|P55884|EIF3B_HUMAN Eukaryotic translation initiation factor 3 subunit B OS=Homo sapiens GN=EIF3B PE=1 SV=3,>sp|P55884-2|EIF3B_HUMAN Isoform 2 of Eukaryotic translation initiation factor 3 subunit B OS=Homo sapiens GN=EIF3B-734->sp|P55884|EIF3B_HUMAN Eukaryotic translation initiation factor 3 subunit B OS=Homo sapiens GN=EIF3B PE=1 SV=3,>sp|P55884-2|EIF3B_HUMAN Isoform 2 of Eukaryotic translat…	EIF3B	EIF3B	>sp|P55884|EIF3B_HUMAN Eukaryotic translation initiation factor 3 subunit B OS=Homo sapiens GN=EIF3B PE=1 SV=3	>sp|P55884|EIF3B_HUMAN Eukaryotic translation initiation factor 3 subunit B OS=Homo sapiens GN=EIF3B PE=1 SV=3	734	741	1	sp|P55884|EIF3B_HUMAN	sp|P55884|EIF3B_HUMAN	EIF3B_734	EIF3B_741	IFEQKDR	LSQSKASK	EIF3B_734-EIF3B_741	734	741
2698-1-14-1-5-1	L1_20190826_HS_1023_FU_CL1_5.mgf	11666	4	3850.79	2	EVQTNDLKEVVNK	8	175	>sp|P61247|RS3A_HUMAN 40S ribosomal protein S3a OS=Homo sapiens GN=RPS3A PE=1 SV=2,>tr|E9PFI5|E9PFI5_HUMAN 40S ribosomal protein S3a OS=Homo sapiens GN=RPS3A PE=1 SV=1,>tr|D6RG13|D6RG13_HUMAN 40S ribosomal protein S3a (Fragment) OS=Homo sapiens GN=RPS3A PE=1 SV=1,>tr|D6RAT0|D6RAT0_HUMAN 40S ribosomal protein S3a OS=Homo sapiens GN=RPS3A PE=1 SV=1,>tr|D6RB09|D6RB09_HUMAN 40S ribosomal protein S3a …	1514.79	1.35e-13	1.35e-13	LMoELHGEGSSSGKATGDETGAK	13	228	>sp|P61247|RS3A_HUMAN 40S ribosomal protein S3a OS=Homo sapiens GN=RPS3A PE=1 SV=2,>tr|D6RAT0|D6RAT0_HUMAN 40S ribosomal protein S3a OS=Homo sapiens GN=RPS3A PE=1 SV=1,>tr|H0Y9Y4|H0Y9Y4_HUMAN 40S ribosomal protein S3a (Fragment) OS=Homo sapiens GN=RPS3A PE=1 SV=1	2176.99	8.07e-06	1.44e-18	>sp|P61247|RS3A_HUMAN 40S ribosomal protein S3a OS=Homo sapiens GN=RPS3A PE=1 SV=2,>tr|D6RAT0|D6RAT0_HUMAN 40S ribosomal protein S3a OS=Homo sapiens GN=RPS3A PE=1 SV=1,>tr|H0Y9Y4|H0Y9Y4_HUMAN 40S ribosomal protein S3a (Fragment) OS=Homo sapiens GN=RPS3A PE=1 SV=1-240->sp|P61247|RS3A_HUMAN 40S ribosomal protein S3a OS=Homo sapiens GN=RPS3A PE=1 SV=2,>tr|E9PFI5|E9PFI5_HUMAN 40S ribosomal protein S3…	RPS3A	RPS3A	>sp|P61247|RS3A_HUMAN 40S ribosomal protein S3a OS=Homo sapiens GN=RPS3A PE=1 SV=2	>sp|P61247|RS3A_HUMAN 40S ribosomal protein S3a OS=Homo sapiens GN=RPS3A PE=1 SV=2	11	182	1	sp|P61247|RS3A_HUMAN	sp|P61247|RS3A_HUMAN	RPS3A_11	RPS3A_182	LMoELHGEGSSSGKATGDETGAK	EVQTNDLKEVVNK	RPS3A_11-RPS3A_182	11	182
6056-1-14-1-26-1	L1_20190826_HS_1023_FU_CL1_6.mgf	22485	6	4530.31	1	YSVDIPLDKTVVNK	9	85	>sp|P61353|RL27_HUMAN 60S ribosomal protein L27 OS=Homo sapiens GN=RPL27 PE=1 SV=2,>tr|K7EQQ9|K7EQQ9_HUMAN 60S ribosomal protein L27 OS=Homo sapiens GN=RPL27 PE=1 SV=1,>tr|K7ELC7|K7ELC7_HUMAN 60S ribosomal protein L27 (Fragment) OS=Homo sapiens GN=RPL27 PE=1 SV=1	1589.87	5.12e-14	4.65e-30	AVIVKNIDDGTSDRPYSHALVAGIDR	5	23	>sp|P61353|RL27_HUMAN 60S ribosomal protein L27 OS=Homo sapiens GN=RPL27 PE=1 SV=2	2781.44	9.04e-20	1.12e-46	>sp|P61353|RL27_HUMAN 60S ribosomal protein L27 OS=Homo sapiens GN=RPL27 PE=1 SV=2-27->sp|P61353|RL27_HUMAN 60S ribosomal protein L27 OS=Homo sapiens GN=RPL27 PE=1 SV=2,>tr|K7EQQ9|K7EQQ9_HUMAN 60S ribosomal protein L27 OS=Homo sapiens GN=RPL27 PE=1 SV=1,>tr|K7ELC7|K7ELC7_HUMAN 60S ribosomal protein L27 (Fragment) OS=Homo sapiens GN=RPL27 PE=1 SV=1-93	RPL27	RPL27	>sp|P61353|RL27_HUMAN 60S ribosomal protein L27 OS=Homo sapiens GN=RPL27 PE=1 SV=2	>sp|P61353|RL27_HUMAN 60S ribosomal protein L27 OS=Homo sapiens GN=RPL27 PE=1 SV=2	27	93	1	sp|P61353|RL27_HUMAN	sp|P61353|RL27_HUMAN	RPL27_27	RPL27_93	AVIVKNIDDGTSDRPYSHALVAGIDR	YSVDIPLDKTVVNK	RPL27_27-RPL27_93	27	93
2643-1-1-1-11-1	L1_20190826_HS_1023_FU_CL1_4.mgf	13557	4	2454.25	1	FMKPGK	3	4	>sp|P61353|RL27_HUMAN 60S ribosomal protein L27 OS=Homo sapiens GN=RPL27 PE=1 SV=2	706.384	0.000489615	4.37e-11	YSVDIPLDKTVVNK	9	85	>sp|P61353|RL27_HUMAN 60S ribosomal protein L27 OS=Homo sapiens GN=RPL27 PE=1 SV=2,>tr|K7EQQ9|K7EQQ9_HUMAN 60S ribosomal protein L27 OS=Homo sapiens GN=RPL27 PE=1 SV=1,>tr|K7ELC7|K7ELC7_HUMAN 60S ribosomal protein L27 (Fragment) OS=Homo sapiens GN=RPL27 PE=1 SV=1	1589.87	8.78e-10	3.47e-25	>sp|P61353|RL27_HUMAN 60S ribosomal protein L27 OS=Homo sapiens GN=RPL27 PE=1 SV=2-6->sp|P61353|RL27_HUMAN 60S ribosomal protein L27 OS=Homo sapiens GN=RPL27 PE=1 SV=2,>tr|K7EQQ9|K7EQQ9_HUMAN 60S ribosomal protein L27 OS=Homo sapiens GN=RPL27 PE=1 SV=1,>tr|K7ELC7|K7ELC7_HUMAN 60S ribosomal protein L27 (Fragment) OS=Homo sapiens GN=RPL27 PE=1 SV=1-93	RPL27	RPL27	>sp|P61353|RL27_HUMAN 60S ribosomal protein L27 OS=Homo sapiens GN=RPL27 PE=1 SV=2	>sp|P61353|RL27_HUMAN 60S ribosomal protein L27 OS=Homo sapiens GN=RPL27 PE=1 SV=2	6	93	1	sp|P61353|RL27_HUMAN	sp|P61353|RL27_HUMAN	RPL27_6	RPL27_93	FMKPGK	YSVDIPLDKTVVNK	RPL27_6-RPL27_93	6	93
3249-1-12-1-4-1	L1_20190826_HS_1023_FU_CL1_7.mgf	13122	4	1896.05	2	VKLDGSR	2	146	>sp|P62081|RS7_HUMAN 40S ribosomal protein S7 OS=Homo sapiens GN=RPS7 PE=1 SV=1,>tr|B5MCP9|B5MCP9_HUMAN 40S ribosomal protein S7 OS=Homo sapiens GN=RPS7 PE=1 SV=1	773.44	2.72e-09	8.08e-16	LIKVHLDK	3	153	>sp|P62081|RS7_HUMAN 40S ribosomal protein S7 OS=Homo sapiens GN=RPS7 PE=1 SV=1,>tr|B5MCP9|B5MCP9_HUMAN 40S ribosomal protein S7 OS=Homo sapiens GN=RPS7 PE=1 SV=1	964.607	3.7e-15	6.91e-23	>sp|P62081|RS7_HUMAN 40S ribosomal protein S7 OS=Homo sapiens GN=RPS7 PE=1 SV=1,>tr|B5MCP9|B5MCP9_HUMAN 40S ribosomal protein S7 OS=Homo sapiens GN=RPS7 PE=1 SV=1-147->sp|P62081|RS7_HUMAN 40S ribosomal protein S7 OS=Homo sapiens GN=RPS7 PE=1 SV=1,>tr|B5MCP9|B5MCP9_HUMAN 40S ribosomal protein S7 OS=Homo sapiens GN=RPS7 PE=1 SV=1-155	RPS7	RPS7	>sp|P62081|RS7_HUMAN 40S ribosomal protein S7 OS=Homo sapiens GN=RPS7 PE=1 SV=1	>sp|P62081|RS7_HUMAN 40S ribosomal protein S7 OS=Homo sapiens GN=RPS7 PE=1 SV=1	147	155	1	sp|P62081|RS7_HUMAN	sp|P62081|RS7_HUMAN	RPS7_147	RPS7_155	VKLDGSR	LIKVHLDK	RPS7_147-RPS7_155	147	155
3523-1-5-1-11-1	L1_20190826_HS_1023_FU_CL1_3.mgf	17891	4	4034.04	1	SEMoTPEELQKR	10	9	>sp|P62316|SMD2_HUMAN Small nuclear ribonucleoprotein Sm D2 OS=Homo sapiens GN=SNRPD2 PE=1 SV=1,>tr|K7ERG4|K7ERG4_HUMAN Small nuclear ribonucleoprotein Sm D2 OS=Homo sapiens GN=SNRPD2 PE=1 SV=1	1362.64	0.229579	3.71e-14	YFILPDSLPLDTLLVDVEPKVK	20	67	>sp|P62314|SMD1_HUMAN Small nuclear ribonucleoprotein Sm D1 OS=Homo sapiens GN=SNRPD1 PE=1 SV=1,>tr|J3QLI9|J3QLI9_HUMAN Small nuclear ribonucleoprotein Sm D1 OS=Homo sapiens GN=SNRPD1 PE=1 SV=1	2513.4	3.35e-20	5.11e-35	>sp|P62314|SMD1_HUMAN Small nuclear ribonucleoprotein Sm D1 OS=Homo sapiens GN=SNRPD1 PE=1 SV=1,>tr|J3QLI9|J3QLI9_HUMAN Small nuclear ribonucleoprotein Sm D1 OS=Homo sapiens GN=SNRPD1 PE=1 SV=1-86->sp|P62316|SMD2_HUMAN Small nuclear ribonucleoprotein Sm D2 OS=Homo sapiens GN=SNRPD2 PE=1 SV=1,>tr|K7ERG4|K7ERG4_HUMAN Small nuclear ribonucleoprotein Sm D2 OS=Homo sapiens GN=SNRPD2 PE=1 SV=1-18	SNRPD1	SNRPD2	>sp|P62314|SMD1_HUMAN Small nuclear ribonucleoprotein Sm D1 OS=Homo sapiens GN=SNRPD1 PE=1 SV=1	>sp|P62316|SMD2_HUMAN Small nuclear ribonucleoprotein Sm D2 OS=Homo sapiens GN=SNRPD2 PE=1 SV=1	86	8	1	sp|P62314|SMD1_HUMAN	sp|P62316|SMD2_HUMAN	SNRPD1_86	SNRPD2_8	YFILPDSLPLDTLLVDVEPKVK	SEMoTPEELQKR	SNRPD1_86-SNRPD2_8	86	8
1334-1-3-1-1-1	L1_20190826_HS_1023_FU_CL1_7.mgf	6813	5	1879.09	1	APTKAAPK	4	132	>sp|P83731|RL24_HUMAN 60S ribosomal protein L24 OS=Homo sapiens GN=RPL24 PE=1 SV=1	782.465	5.42e-07	3.32e-17	QKIVKPVK	2	140	>sp|P83731|RL24_HUMAN 60S ribosomal protein L24 OS=Homo sapiens GN=RPL24 PE=1 SV=1	938.628	1	3.95e-15	>sp|P83731|RL24_HUMAN 60S ribosomal protein L24 OS=Homo sapiens GN=RPL24 PE=1 SV=1-135->sp|P83731|RL24_HUMAN 60S ribosomal protein L24 OS=Homo sapiens GN=RPL24 PE=1 SV=1-141	RPL24	RPL24	>sp|P83731|RL24_HUMAN 60S ribosomal protein L24 OS=Homo sapiens GN=RPL24 PE=1 SV=1	>sp|P83731|RL24_HUMAN 60S ribosomal protein L24 OS=Homo sapiens GN=RPL24 PE=1 SV=1	135	141	0	sp|P83731|RL24_HUMAN	sp|P83731|RL24_HUMAN	RPL24_135	RPL24_141	APTKAAPK	QKIVKPVK	RPL24_135-RPL24_141	135	141
1553-1-43-1-26-1	L1_20190826_HS_1023_FU_CL1_7.mgf	7527	4	2513.23	1	QAQQAGK	7	98	>sp|P84090|ERH_HUMAN Enhancer of rudimentary homolog OS=Homo sapiens GN=ERH PE=1 SV=1	729.377	1.57e-14	1.57e-14	IKMoIASDSHRPEVK	2	533	>sp|Q9NYF8-2|BCLF1_HUMAN Isoform 2 of Bcl-2-associated transcription factor 1 OS=Homo sapiens GN=BCLAF1,>sp|Q9NYF8|BCLF1_HUMAN Bcl-2-associated transcription factor 1 OS=Homo sapiens GN=BCLAF1 PE=1 SV=2,>sp|Q9NYF8-4|BCLF1_HUMAN Isoform 4 of Bcl-2-associated transcription factor 1 OS=Homo sapiens GN=BCLAF1	1625.86	0.616192	1.45e-16	>sp|P84090|ERH_HUMAN Enhancer of rudimentary homolog OS=Homo sapiens GN=ERH PE=1 SV=1-104->sp|Q9NYF8-2|BCLF1_HUMAN Isoform 2 of Bcl-2-associated transcription factor 1 OS=Homo sapiens GN=BCLAF1,>sp|Q9NYF8|BCLF1_HUMAN Bcl-2-associated transcription factor 1 OS=Homo sapiens GN=BCLAF1 PE=1 SV=2,>sp|Q9NYF8-4|BCLF1_HUMAN Isoform 4 of Bcl-2-associated transcription factor 1 OS=Homo sapiens GN=BCLAF1-534	BCLAF1	ERH	>sp|Q9NYF8-2|BCLF1_HUMAN Isoform 2 of Bcl-2-associated transcription factor 1 OS=Homo sapiens GN=BCLAF1	>sp|P84090|ERH_HUMAN Enhancer of rudimentary homolog OS=Homo sapiens GN=ERH PE=1 SV=1	0	104	1	sp|Q9NYF8-2|BCLF1_HUMAN	sp|P84090|ERH_HUMAN	BCLAF1_0	ERH_104	IKMoIASDSHRPEVK	QAQQAGK	BCLAF1_0-ERH_104	0	104
1798-1-1-1-27-1	L1_20190826_HS_1023_FU_CL1_7.mgf	8339	4	2513.24	1	QAQQAGK	7	98	>sp|P84090|ERH_HUMAN Enhancer of rudimentary homolog OS=Homo sapiens GN=ERH PE=1 SV=1	729.377	6.14e-13	6.14e-13	MoIASDSHRPEVKLK	12	535	>sp|Q9NYF8-2|BCLF1_HUMAN Isoform 2 of Bcl-2-associated transcription factor 1 OS=Homo sapiens GN=BCLAF1,>sp|Q9NYF8|BCLF1_HUMAN Bcl-2-associated transcription factor 1 OS=Homo sapiens GN=BCLAF1 PE=1 SV=2,>sp|Q9NYF8-4|BCLF1_HUMAN Isoform 4 of Bcl-2-associated transcription factor 1 OS=Homo sapiens GN=BCLAF1	1625.86	1	7.4e-16	>sp|P84090|ERH_HUMAN Enhancer of rudimentary homolog OS=Homo sapiens GN=ERH PE=1 SV=1-104->sp|Q9NYF8-2|BCLF1_HUMAN Isoform 2 of Bcl-2-associated transcription factor 1 OS=Homo sapiens GN=BCLAF1,>sp|Q9NYF8|BCLF1_HUMAN Bcl-2-associated transcription factor 1 OS=Homo sapiens GN=BCLAF1 PE=1 SV=2,>sp|Q9NYF8-4|BCLF1_HUMAN Isoform 4 of Bcl-2-associated transcription factor 1 OS=Homo sapiens GN=BCLAF1-546	BCLAF1	ERH	>sp|Q9NYF8-2|BCLF1_HUMAN Isoform 2 of Bcl-2-associated transcription factor 1 OS=Homo sapiens GN=BCLAF1	>sp|P84090|ERH_HUMAN Enhancer of rudimentary homolog OS=Homo sapiens GN=ERH PE=1 SV=1	10	104	1	sp|Q9NYF8-2|BCLF1_HUMAN	sp|P84090|ERH_HUMAN	BCLAF1_10	ERH_104	MoIASDSHRPEVKLK	QAQQAGK	BCLAF1_10-ERH_104	10	104
4264-1-5-1-8-1	L1_20190826_HS_1023_FU_CL1_4.mgf	18548	4	2689.38	1	EKIYVLLR	2	89	>sp|P84090|ERH_HUMAN Enhancer of rudimentary homolog OS=Homo sapiens GN=ERH PE=1 SV=1	1032.63	7.09e-05	2.39e-11	GDFPTGKSSFSITR	7	552	>sp|Q9Y2W1|TR150_HUMAN Thyroid hormone receptor-associated protein 3 OS=Homo sapiens GN=THRAP3 PE=1 SV=2	1498.74	1.97e-14	6.32e-22	>sp|P84090|ERH_HUMAN Enhancer of rudimentary homolog OS=Homo sapiens GN=ERH PE=1 SV=1-90->sp|Q9Y2W1|TR150_HUMAN Thyroid hormone receptor-associated protein 3 OS=Homo sapiens GN=THRAP3 PE=1 SV=2-558	ERH	THRAP3	>sp|P84090|ERH_HUMAN Enhancer of rudimentary homolog OS=Homo sapiens GN=ERH PE=1 SV=1	>sp|Q9Y2W1|TR150_HUMAN Thyroid hormone receptor-associated protein 3 OS=Homo sapiens GN=THRAP3 PE=1 SV=2	90	558	0	sp|P84090|ERH_HUMAN	sp|Q9Y2W1|TR150_HUMAN	ERH_90	THRAP3_558	EKIYVLLR	GDFPTGKSSFSITR	ERH_90-THRAP3_558	90	558
6647-1-8-1-1-1	L1_20190826_HS_1023_FU_CL1_7.mgf	23984	5	3513.87	1	SIFDHIKLPQASK	7	585	>sp|Q9NYF8-2|BCLF1_HUMAN Isoform 2 of Bcl-2-associated transcription factor 1 OS=Homo sapiens GN=BCLAF1,>sp|Q9NYF8|BCLF1_HUMAN Bcl-2-associated transcription factor 1 OS=Homo sapiens GN=BCLAF1 PE=1 SV=2,>sp|Q9NYF8-4|BCLF1_HUMAN Isoform 4 of Bcl-2-associated transcription factor 1 OS=Homo sapiens GN=BCLAF1	1482.82	8.95e-05	1.38e-16	SHTILLVQPTKRPEGR	11	2	>sp|P84090|ERH_HUMAN Enhancer of rudimentary homolog OS=Homo sapiens GN=ERH PE=1 SV=1,>tr|G3V279|G3V279_HUMAN Enhancer of rudimentary homolog OS=Homo sapiens GN=ERH PE=1 SV=1	1873.05	7.89e-14	1.22e-22	>sp|P84090|ERH_HUMAN Enhancer of rudimentary homolog OS=Homo sapiens GN=ERH PE=1 SV=1,>tr|G3V279|G3V279_HUMAN Enhancer of rudimentary homolog OS=Homo sapiens GN=ERH PE=1 SV=1-12->sp|Q9NYF8-2|BCLF1_HUMAN Isoform 2 of Bcl-2-associated transcription factor 1 OS=Homo sapiens GN=BCLAF1,>sp|Q9NYF8|BCLF1_HUMAN Bcl-2-associated transcription factor 1 OS=Homo sapiens GN=BCLAF1 PE=1 SV=2,>sp|Q9NYF8-4|BCLF1…	BCLAF1	ERH	>sp|Q9NYF8-2|BCLF1_HUMAN Isoform 2 of Bcl-2-associated transcription factor 1 OS=Homo sapiens GN=BCLAF1	>sp|P84090|ERH_HUMAN Enhancer of rudimentary homolog OS=Homo sapiens GN=ERH PE=1 SV=1	591	12	1	sp|Q9NYF8-2|BCLF1_HUMAN	sp|P84090|ERH_HUMAN	BCLAF1_591	ERH_12	SIFDHIKLPQASK	SHTILLVQPTKRPEGR	BCLAF1_591-ERH_12	591	12
1664-1-5-1-10-1	L1_20190826_HS_1023_FU_CL1_3.mgf	12135	4	2494.4	1	IDISNVKIPK	7	201	>sp|Q02878|RL6_HUMAN 60S ribosomal protein L6 OS=Homo sapiens GN=RPL6 PE=1 SV=3	1125.68	1.38e-12	6.23e-23	AVDSQILPKIK	9	252	>sp|Q02878|RL6_HUMAN 60S ribosomal protein L6 OS=Homo sapiens GN=RPL6 PE=1 SV=3	1210.73	1.22e-20	5.97e-31	>sp|Q02878|RL6_HUMAN 60S ribosomal protein L6 OS=Homo sapiens GN=RPL6 PE=1 SV=3-207->sp|Q02878|RL6_HUMAN 60S ribosomal protein L6 OS=Homo sapiens GN=RPL6 PE=1 SV=3-260	RPL6	RPL6	>sp|Q02878|RL6_HUMAN 60S ribosomal protein L6 OS=Homo sapiens GN=RPL6 PE=1 SV=3	>sp|Q02878|RL6_HUMAN 60S ribosomal protein L6 OS=Homo sapiens GN=RPL6 PE=1 SV=3	207	260	0	sp|Q02878|RL6_HUMAN	sp|Q02878|RL6_HUMAN	RPL6_207	RPL6_260	IDISNVKIPK	AVDSQILPKIK	RPL6_207-RPL6_260	207	260
1331-1-13-1-1-1	L1_20190826_HS_1023_FU_CL1_5.mgf	6875	4	2418.08	1	TEEKEIAAR	4	209	>sp|Q04727-4|TLE4_HUMAN Isoform 4 of Transducin-like enhancer protein 4 OS=Homo sapiens GN=TLE4,>sp|Q04727|TLE4_HUMAN Transducin-like enhancer protein 4 OS=Homo sapiens GN=TLE4 PE=1 SV=3,>sp|Q04727-3|TLE4_HUMAN Isoform 3 of Transducin-like enhancer protein 4 OS=Homo sapiens GN=TLE4,>sp|Q04727-2|TLE4_HUMAN Isoform 2 of Transducin-like enhancer protein 4 OS=Homo sapiens GN=TLE4	1045.54	2.44e-11	2.97e-19	NSADYSSESKK	10	196	>sp|Q04727-4|TLE4_HUMAN Isoform 4 of Transducin-like enhancer protein 4 OS=Homo sapiens GN=TLE4,>sp|Q04727|TLE4_HUMAN Transducin-like enhancer protein 4 OS=Homo sapiens GN=TLE4 PE=1 SV=3,>sp|Q04727-3|TLE4_HUMAN Isoform 3 of Transducin-like enhancer protein 4 OS=Homo sapiens GN=TLE4,>sp|Q04727-2|TLE4_HUMAN Isoform 2 of Transducin-like enhancer protein 4 OS=Homo sapiens GN=TLE4	1214.54	8.37e-15	1.96e-26	>sp|Q04727-4|TLE4_HUMAN Isoform 4 of Transducin-like enhancer protein 4 OS=Homo sapiens GN=TLE4,>sp|Q04727|TLE4_HUMAN Transducin-like enhancer protein 4 OS=Homo sapiens GN=TLE4 PE=1 SV=3,>sp|Q04727-3|TLE4_HUMAN Isoform 3 of Transducin-like enhancer protein 4 OS=Homo sapiens GN=TLE4,>sp|Q04727-2|TLE4_HUMAN Isoform 2 of Transducin-like enhancer protein 4 OS=Homo sapiens GN=TLE4-205->sp|Q04727-4|TLE…	TLE4	TLE4	>sp|Q04727-4|TLE4_HUMAN Isoform 4 of Transducin-like enhancer protein 4 OS=Homo sapiens GN=TLE4	>sp|Q04727-4|TLE4_HUMAN Isoform 4 of Transducin-like enhancer protein 4 OS=Homo sapiens GN=TLE4	205	212	1	sp|Q04727-4|TLE4_HUMAN	sp|Q04727-4|TLE4_HUMAN	TLE4_205	TLE4_212	NSADYSSESKK	TEEKEIAAR	TLE4_205-TLE4_212	205	212
1407-2-3-1-2-1	L1_20190826_HS_1023_FU_CL1_7.mgf	7051	4	2418.11	1	EDVKGDR	4	1676	>sp|Q12873|CHD3_HUMAN Chromodomain-helicase-DNA-binding protein 3 OS=Homo sapiens GN=CHD3 PE=1 SV=3,>sp|Q12873-3|CHD3_HUMAN Isoform 3 of Chromodomain-helicase-DNA-binding protein 3 OS=Homo sapiens GN=CHD3	817.393	8.3e-06	9.4e-13	ERPEGETGDLGKR	12	1663	>sp|Q12873|CHD3_HUMAN Chromodomain-helicase-DNA-binding protein 3 OS=Homo sapiens GN=CHD3 PE=1 SV=3,>sp|Q12873-3|CHD3_HUMAN Isoform 3 of Chromodomain-helicase-DNA-binding protein 3 OS=Homo sapiens GN=CHD3	1442.71	3.6e-08	4.9e-19	>sp|Q12873|CHD3_HUMAN Chromodomain-helicase-DNA-binding protein 3 OS=Homo sapiens GN=CHD3 PE=1 SV=3,>sp|Q12873-3|CHD3_HUMAN Isoform 3 of Chromodomain-helicase-DNA-binding protein 3 OS=Homo sapiens GN=CHD3-1674->sp|Q12873|CHD3_HUMAN Chromodomain-helicase-DNA-binding protein 3 OS=Homo sapiens GN=CHD3 PE=1 SV=3,>sp|Q12873-3|CHD3_HUMAN Isoform 3 of Chromodomain-helicase-DNA-binding protein 3 OS=Homo …	CHD3	CHD3	>sp|Q12873|CHD3_HUMAN Chromodomain-helicase-DNA-binding protein 3 OS=Homo sapiens GN=CHD3 PE=1 SV=3	>sp|Q12873|CHD3_HUMAN Chromodomain-helicase-DNA-binding protein 3 OS=Homo sapiens GN=CHD3 PE=1 SV=3	1674	1679	1	sp|Q12873|CHD3_HUMAN	sp|Q12873|CHD3_HUMAN	CHD3_1674	CHD3_1679	ERPEGETGDLGKR	EDVKGDR	CHD3_1674-CHD3_1679	1674	1679
2511-1-8-1-16-1	L1_20190826_HS_1023_FU_CL1_8.mgf	10893	5	3668.7	1	KDEDPENKIEFK	1	198	>sp|Q13123|RED_HUMAN Protein Red OS=Homo sapiens GN=IK PE=1 SV=3	1490.73	0.100333	1.38e-13	EKEEEELMoEKPQKETK	10	182	>sp|Q13123|RED_HUMAN Protein Red OS=Homo sapiens GN=IK PE=1 SV=3	2019.97	1	8.09e-17	>sp|Q13123|RED_HUMAN Protein Red OS=Homo sapiens GN=IK PE=1 SV=3-191->sp|Q13123|RED_HUMAN Protein Red OS=Homo sapiens GN=IK PE=1 SV=3-198	IK	IK	>sp|Q13123|RED_HUMAN Protein Red OS=Homo sapiens GN=IK PE=1 SV=3	>sp|Q13123|RED_HUMAN Protein Red OS=Homo sapiens GN=IK PE=1 SV=3	191	198	0	sp|Q13123|RED_HUMAN	sp|Q13123|RED_HUMAN	IK_191	IK_198	EKEEEELMoEKPQKETK	KDEDPENKIEFK	IK_191-IK_198	191	198
4614-2-4-1-9-1	L1_20190826_HS_1023_FU_CL1_7.mgf	17398	4	2401.15	2	MLFKSK	4	219	>sp|Q13123|RED_HUMAN Protein Red OS=Homo sapiens GN=IK PE=1 SV=3	752.425	7.75e-08	9.54e-16	KDEDPENKIEFK	8	198	>sp|Q13123|RED_HUMAN Protein Red OS=Homo sapiens GN=IK PE=1 SV=3	1490.73	8.75e-10	1.08e-21	>sp|Q13123|RED_HUMAN Protein Red OS=Homo sapiens GN=IK PE=1 SV=3-205->sp|Q13123|RED_HUMAN Protein Red OS=Homo sapiens GN=IK PE=1 SV=3-222	IK	IK	>sp|Q13123|RED_HUMAN Protein Red OS=Homo sapiens GN=IK PE=1 SV=3	>sp|Q13123|RED_HUMAN Protein Red OS=Homo sapiens GN=IK PE=1 SV=3	205	222	0	sp|Q13123|RED_HUMAN	sp|Q13123|RED_HUMAN	IK_205	IK_222	KDEDPENKIEFK	MLFKSK	IK_205-IK_222	205	222
2308-1-3-1-3-1	L1_20190826_HS_1023_FU_CL1_3.mgf	14169	4	3480.62	1	YGGLKMPTR	5	427	>tr|E7ESY4|E7ESY4_HUMAN Metastasis-associated protein MTA1 OS=Homo sapiens GN=MTA1 PE=1 SV=1,>sp|Q13330-3|MTA1_HUMAN Isoform 3 of Metastasis-associated protein MTA1 OS=Homo sapiens GN=MTA1,>sp|Q13330|MTA1_HUMAN Metastasis-associated protein MTA1 OS=Homo sapiens GN=MTA1 PE=1 SV=2,>tr|H0Y4T7|H0Y4T7_HUMAN Metastasis-associated protein MTA1 (Fragment) OS=Homo sapiens GN=MTA1 PE=1 SV=1	1021.54	0.0769771	5.14e-15	EIEEEMENPEMVDLPEKLK	17	65	>sp|Q13330-3|MTA1_HUMAN Isoform 3 of Metastasis-associated protein MTA1 OS=Homo sapiens GN=MTA1	2301.08	2.82e-30	1.17e-42	>sp|Q13330-3|MTA1_HUMAN Isoform 3 of Metastasis-associated protein MTA1 OS=Homo sapiens GN=MTA1-81->tr|E7ESY4|E7ESY4_HUMAN Metastasis-associated protein MTA1 OS=Homo sapiens GN=MTA1 PE=1 SV=1,>sp|Q13330-3|MTA1_HUMAN Isoform 3 of Metastasis-associated protein MTA1 OS=Homo sapiens GN=MTA1,>sp|Q13330|MTA1_HUMAN Metastasis-associated protein MTA1 OS=Homo sapiens GN=MTA1 PE=1 SV=2,>tr|H0Y4T7|H0Y4T7_HU…	MTA1	MTA1	>sp|Q13330-3|MTA1_HUMAN Isoform 3 of Metastasis-associated protein MTA1 OS=Homo sapiens GN=MTA1	>sp|Q13330-3|MTA1_HUMAN Isoform 3 of Metastasis-associated protein MTA1 OS=Homo sapiens GN=MTA1	414	81	1	sp|Q13330-3|MTA1_HUMAN	sp|Q13330-3|MTA1_HUMAN	MTA1_414	MTA1_81	YGGLKMPTR	EIEEEMENPEMVDLPEKLK	MTA1_414-MTA1_81	414	81
637-1-14-1-14-1	L1_20190826_HS_1023_FU_CL1_7.mgf	4585	4	2004.01	1	GVKEEVK	3	474	>sp|Q13547|HDAC1_HUMAN Histone deacetylase 1 OS=Homo sapiens GN=HDAC1 PE=1 SV=1	787.444	5.83e-08	1.01e-15	TKEEKPEAK	2	465	>sp|Q13547|HDAC1_HUMAN Histone deacetylase 1 OS=Homo sapiens GN=HDAC1 PE=1 SV=1	1058.56	2.32e-09	2e-18	>sp|Q13547|HDAC1_HUMAN Histone deacetylase 1 OS=Homo sapiens GN=HDAC1 PE=1 SV=1-466->sp|Q13547|HDAC1_HUMAN Histone deacetylase 1 OS=Homo sapiens GN=HDAC1 PE=1 SV=1-476	HDAC1	HDAC1	>sp|Q13547|HDAC1_HUMAN Histone deacetylase 1 OS=Homo sapiens GN=HDAC1 PE=1 SV=1	>sp|Q13547|HDAC1_HUMAN Histone deacetylase 1 OS=Homo sapiens GN=HDAC1 PE=1 SV=1	466	476	0	sp|Q13547|HDAC1_HUMAN	sp|Q13547|HDAC1_HUMAN	HDAC1_466	HDAC1_476	TKEEKPEAK	GVKEEVK	HDAC1_466-HDAC1_476	466	476
5871-1-9-1-2-1	L1_20190826_HS_1023_FU_CL1_7.mgf	21255	5	3541.87	1	LIKHAVQER	3	207	>sp|Q15029-2|U5S1_HUMAN Isoform 2 of 116 kDa U5 small nuclear ribonucleoprotein component OS=Homo sapiens GN=EFTUD2,>sp|Q15029-3|U5S1_HUMAN Isoform 3 of 116 kDa U5 small nuclear ribonucleoprotein component OS=Homo sapiens GN=EFTUD2,>sp|Q15029|U5S1_HUMAN 116 kDa U5 small nuclear ribonucleoprotein component OS=Homo sapiens GN=EFTUD2 PE=1 SV=1	1092.64	1	5.18e-11	GNEEAQIFRPLKFNTTSVIK	12	535	>sp|Q15029-2|U5S1_HUMAN Isoform 2 of 116 kDa U5 small nuclear ribonucleoprotein component OS=Homo sapiens GN=EFTUD2,>sp|Q15029-3|U5S1_HUMAN Isoform 3 of 116 kDa U5 small nuclear ribonucleoprotein component OS=Homo sapiens GN=EFTUD2,>sp|Q15029|U5S1_HUMAN 116 kDa U5 small nuclear ribonucleoprotein component OS=Homo sapiens GN=EFTUD2 PE=1 SV=1	2291.23	2.24e-28	1.91e-46	>sp|Q15029-2|U5S1_HUMAN Isoform 2 of 116 kDa U5 small nuclear ribonucleoprotein component OS=Homo sapiens GN=EFTUD2,>sp|Q15029-3|U5S1_HUMAN Isoform 3 of 116 kDa U5 small nuclear ribonucleoprotein component OS=Homo sapiens GN=EFTUD2,>sp|Q15029|U5S1_HUMAN 116 kDa U5 small nuclear ribonucleoprotein component OS=Homo sapiens GN=EFTUD2 PE=1 SV=1-209->sp|Q15029-2|U5S1_HUMAN Isoform 2 of 116 kDa U5 smal…	EFTUD2	EFTUD2	>sp|Q15029-2|U5S1_HUMAN Isoform 2 of 116 kDa U5 small nuclear ribonucleoprotein component OS=Homo sapiens GN=EFTUD2	>sp|Q15029-2|U5S1_HUMAN Isoform 2 of 116 kDa U5 small nuclear ribonucleoprotein component OS=Homo sapiens GN=EFTUD2	209	546	1	sp|Q15029-2|U5S1_HUMAN	sp|Q15029-2|U5S1_HUMAN	EFTUD2_209	EFTUD2_546	LIKHAVQER	GNEEAQIFRPLKFNTTSVIK	EFTUD2_209-EFTUD2_546	209	546
4405-1-4-1-17-1	L1_20190826_HS_1023_FU_CL1_5.mgf	17190	4	2627.28	1	KAPTSSSQR	1	324	>sp|Q15029-2|U5S1_HUMAN Isoform 2 of 116 kDa U5 small nuclear ribonucleoprotein component OS=Homo sapiens GN=EFTUD2,>sp|Q15029-3|U5S1_HUMAN Isoform 3 of 116 kDa U5 small nuclear ribonucleoprotein component OS=Homo sapiens GN=EFTUD2,>sp|Q15029|U5S1_HUMAN 116 kDa U5 small nuclear ribonucleoprotein component OS=Homo sapiens GN=EFTUD2 PE=1 SV=1	960.499	5.39e-11	1.07e-20	LWGDIYFNPKTR	10	308	>sp|Q15029-2|U5S1_HUMAN Isoform 2 of 116 kDa U5 small nuclear ribonucleoprotein component OS=Homo sapiens GN=EFTUD2,>sp|Q15029-3|U5S1_HUMAN Isoform 3 of 116 kDa U5 small nuclear ribonucleoprotein component OS=Homo sapiens GN=EFTUD2,>sp|Q15029|U5S1_HUMAN 116 kDa U5 small nuclear ribonucleoprotein component OS=Homo sapiens GN=EFTUD2 PE=1 SV=1	1508.78	1.17e-24	1.17e-24	>sp|Q15029-2|U5S1_HUMAN Isoform 2 of 116 kDa U5 small nuclear ribonucleoprotein component OS=Homo sapiens GN=EFTUD2,>sp|Q15029-3|U5S1_HUMAN Isoform 3 of 116 kDa U5 small nuclear ribonucleoprotein component OS=Homo sapiens GN=EFTUD2,>sp|Q15029|U5S1_HUMAN 116 kDa U5 small nuclear ribonucleoprotein component OS=Homo sapiens GN=EFTUD2 PE=1 SV=1-317->sp|Q15029-2|U5S1_HUMAN Isoform 2 of 116 kDa U5 smal…	EFTUD2	EFTUD2	>sp|Q15029-2|U5S1_HUMAN Isoform 2 of 116 kDa U5 small nuclear ribonucleoprotein component OS=Homo sapiens GN=EFTUD2	>sp|Q15029-2|U5S1_HUMAN Isoform 2 of 116 kDa U5 small nuclear ribonucleoprotein component OS=Homo sapiens GN=EFTUD2	317	324	1	sp|Q15029-2|U5S1_HUMAN	sp|Q15029-2|U5S1_HUMAN	EFTUD2_317	EFTUD2_324	LWGDIYFNPKTR	KAPTSSSQR	EFTUD2_317-EFTUD2_324	317	324
7811-1-4-1-15-1	L1_20190826_HS_1023_FU_CL1_7.mgf	27588	4	4319.04	2	KAPTSSSQR	1	324	>sp|Q15029-2|U5S1_HUMAN Isoform 2 of 116 kDa U5 small nuclear ribonucleoprotein component OS=Homo sapiens GN=EFTUD2,>sp|Q15029-3|U5S1_HUMAN Isoform 3 of 116 kDa U5 small nuclear ribonucleoprotein component OS=Homo sapiens GN=EFTUD2,>sp|Q15029|U5S1_HUMAN 116 kDa U5 small nuclear ribonucleoprotein component OS=Homo sapiens GN=EFTUD2 PE=1 SV=1	960.499	2.29e-09	1.71e-17	HSVKSQEPLPDDDEEFELPEFVEPFLK	4	363	>sp|Q6P2Q9|PRP8_HUMAN Pre-mRNA-processing-splicing factor 8 OS=Homo sapiens GN=PRPF8 PE=1 SV=2	3199.52	3.39e-26	2.94e-40	>sp|Q15029-2|U5S1_HUMAN Isoform 2 of 116 kDa U5 small nuclear ribonucleoprotein component OS=Homo sapiens GN=EFTUD2,>sp|Q15029-3|U5S1_HUMAN Isoform 3 of 116 kDa U5 small nuclear ribonucleoprotein component OS=Homo sapiens GN=EFTUD2,>sp|Q15029|U5S1_HUMAN 116 kDa U5 small nuclear ribonucleoprotein component OS=Homo sapiens GN=EFTUD2 PE=1 SV=1-324->sp|Q6P2Q9|PRP8_HUMAN Pre-mRNA-processing-splicing f…	EFTUD2	PRPF8	>sp|Q15029-2|U5S1_HUMAN Isoform 2 of 116 kDa U5 small nuclear ribonucleoprotein component OS=Homo sapiens GN=EFTUD2	>sp|Q6P2Q9|PRP8_HUMAN Pre-mRNA-processing-splicing factor 8 OS=Homo sapiens GN=PRPF8 PE=1 SV=2	324	366	1	sp|Q15029-2|U5S1_HUMAN	sp|Q6P2Q9|PRP8_HUMAN	EFTUD2_324	PRPF8_366	KAPTSSSQR	HSVKSQEPLPDDDEEFELPEFVEPFLK	EFTUD2_324-PRPF8_366	324	366
2909-2-6-1-26-1	L1_20190826_HS_1023_FU_CL1_6.mgf	12343	4	2998.52	1	KPESTVPSK	1	313	>sp|Q5JVS0|HABP4_HUMAN Intracellular hyaluronan-binding protein 4 OS=Homo sapiens GN=HABP4 PE=1 SV=1,>sp|Q5JVS0-2|HABP4_HUMAN Isoform 2 of Intracellular hyaluronan-binding protein 4 OS=Homo sapiens GN=HABP4	971.529	7.17e-08	1.18e-15	NLQEQTRPKPEFNIR	9	298	>sp|Q5JVS0|HABP4_HUMAN Intracellular hyaluronan-binding protein 4 OS=Homo sapiens GN=HABP4 PE=1 SV=1,>sp|Q5JVS0-2|HABP4_HUMAN Isoform 2 of Intracellular hyaluronan-binding protein 4 OS=Homo sapiens GN=HABP4	1868.99	0.308155	3.46e-19	>sp|Q5JVS0|HABP4_HUMAN Intracellular hyaluronan-binding protein 4 OS=Homo sapiens GN=HABP4 PE=1 SV=1,>sp|Q5JVS0-2|HABP4_HUMAN Isoform 2 of Intracellular hyaluronan-binding protein 4 OS=Homo sapiens GN=HABP4-306->sp|Q5JVS0|HABP4_HUMAN Intracellular hyaluronan-binding protein 4 OS=Homo sapiens GN=HABP4 PE=1 SV=1,>sp|Q5JVS0-2|HABP4_HUMAN Isoform 2 of Intracellular hyaluronan-binding protein 4 OS=Hom…	HABP4	HABP4	>sp|Q5JVS0|HABP4_HUMAN Intracellular hyaluronan-binding protein 4 OS=Homo sapiens GN=HABP4 PE=1 SV=1	>sp|Q5JVS0|HABP4_HUMAN Intracellular hyaluronan-binding protein 4 OS=Homo sapiens GN=HABP4 PE=1 SV=1	306	313	1	sp|Q5JVS0|HABP4_HUMAN	sp|Q5JVS0|HABP4_HUMAN	HABP4_306	HABP4_313	NLQEQTRPKPEFNIR	KPESTVPSK	HABP4_306-HABP4_313	306	313
3432-1-25-1-15-1	L1_20190826_HS_1023_FU_CL1_4.mgf	16019	4	2615.43	2	IFDLLPNKIR	8	1537	>sp|Q5VW36|FOCAD_HUMAN Focadhesin OS=Homo sapiens GN=FOCAD PE=1 SV=1	1227.73	3.93e-14	3.93e-14	IAQVTKSNIEK	6	1571	>sp|Q5VW36|FOCAD_HUMAN Focadhesin OS=Homo sapiens GN=FOCAD PE=1 SV=1	1229.7	6.21e-20	6.16e-28	>sp|Q5VW36|FOCAD_HUMAN Focadhesin OS=Homo sapiens GN=FOCAD PE=1 SV=1-1544->sp|Q5VW36|FOCAD_HUMAN Focadhesin OS=Homo sapiens GN=FOCAD PE=1 SV=1-1576	FOCAD	FOCAD	>sp|Q5VW36|FOCAD_HUMAN Focadhesin OS=Homo sapiens GN=FOCAD PE=1 SV=1	>sp|Q5VW36|FOCAD_HUMAN Focadhesin OS=Homo sapiens GN=FOCAD PE=1 SV=1	1544	1576	0	sp|Q5VW36|FOCAD_HUMAN	sp|Q5VW36|FOCAD_HUMAN	FOCAD_1544	FOCAD_1576	IFDLLPNKIR	IAQVTKSNIEK	FOCAD_1544-FOCAD_1576	1544	1576
2938-1-17-1-13-1	L1_20190826_HS_1023_FU_CL1_7.mgf	12138	4	3174.54	2	LSAQDSQKNVAVR	8	513	>sp|Q68DQ2|CRBG3_HUMAN Very large A-kinase anchor protein OS=Homo sapiens GN=CRYBG3 PE=1 SV=3	1414.75	2.23e-22	1.43e-32	HAVTDTEFVNEGKR	13	499	>sp|Q68DQ2|CRBG3_HUMAN Very large A-kinase anchor protein OS=Homo sapiens GN=CRYBG3 PE=1 SV=3	1601.78	5.66e-09	2.81e-21	>sp|Q68DQ2|CRBG3_HUMAN Very large A-kinase anchor protein OS=Homo sapiens GN=CRYBG3 PE=1 SV=3-511->sp|Q68DQ2|CRBG3_HUMAN Very large A-kinase anchor protein OS=Homo sapiens GN=CRYBG3 PE=1 SV=3-520	CRYBG3	CRYBG3	>sp|Q68DQ2|CRBG3_HUMAN Very large A-kinase anchor protein OS=Homo sapiens GN=CRYBG3 PE=1 SV=3	>sp|Q68DQ2|CRBG3_HUMAN Very large A-kinase anchor protein OS=Homo sapiens GN=CRYBG3 PE=1 SV=3	511	520	0	sp|Q68DQ2|CRBG3_HUMAN	sp|Q68DQ2|CRBG3_HUMAN	CRYBG3_511	CRYBG3_520	HAVTDTEFVNEGKR	LSAQDSQKNVAVR	CRYBG3_511-CRYBG3_520	511	520
6588-1-23-1-11-1	L1_20190826_HS_1023_FU_CL1_7.mgf	23725	5	3119.6	1	IMKANPALYVLR	3	1733	>sp|Q6P2Q9|PRP8_HUMAN Pre-mRNA-processing-splicing factor 8 OS=Homo sapiens GN=PRPF8 PE=1 SV=2	1387.8	1.56e-16	1.19e-26	WSKQTDVGITHFR	3	1342	>sp|Q6P2Q9|PRP8_HUMAN Pre-mRNA-processing-splicing factor 8 OS=Homo sapiens GN=PRPF8 PE=1 SV=2	1573.8	0.427769	8.07e-25	>sp|Q6P2Q9|PRP8_HUMAN Pre-mRNA-processing-splicing factor 8 OS=Homo sapiens GN=PRPF8 PE=1 SV=2-1344->sp|Q6P2Q9|PRP8_HUMAN Pre-mRNA-processing-splicing factor 8 OS=Homo sapiens GN=PRPF8 PE=1 SV=2-1735	PRPF8	PRPF8	>sp|Q6P2Q9|PRP8_HUMAN Pre-mRNA-processing-splicing factor 8 OS=Homo sapiens GN=PRPF8 PE=1 SV=2	>sp|Q6P2Q9|PRP8_HUMAN Pre-mRNA-processing-splicing factor 8 OS=Homo sapiens GN=PRPF8 PE=1 SV=2	1344	1735	0	sp|Q6P2Q9|PRP8_HUMAN	sp|Q6P2Q9|PRP8_HUMAN	PRPF8_1344	PRPF8_1735	WSKQTDVGITHFR	IMKANPALYVLR	PRPF8_1344-PRPF8_1735	1344	1735
3666-1-11-1-22-1	L1_20190826_HS_1023_FU_CL1_7.mgf	14483	5	3350.63	1	WSKQTDVGITHFR	3	1342	>sp|Q6P2Q9|PRP8_HUMAN Pre-mRNA-processing-splicing factor 8 OS=Homo sapiens GN=PRPF8 PE=1 SV=2	1573.8	1.9e-10	2.28e-32	QTKEQSQLTATQTR	3	2032	>sp|Q6P2Q9|PRP8_HUMAN Pre-mRNA-processing-splicing factor 8 OS=Homo sapiens GN=PRPF8 PE=1 SV=2	1618.83	1.91e-18	3.09e-27	>sp|Q6P2Q9|PRP8_HUMAN Pre-mRNA-processing-splicing factor 8 OS=Homo sapiens GN=PRPF8 PE=1 SV=2-1344->sp|Q6P2Q9|PRP8_HUMAN Pre-mRNA-processing-splicing factor 8 OS=Homo sapiens GN=PRPF8 PE=1 SV=2-2034	PRPF8	PRPF8	>sp|Q6P2Q9|PRP8_HUMAN Pre-mRNA-processing-splicing factor 8 OS=Homo sapiens GN=PRPF8 PE=1 SV=2	>sp|Q6P2Q9|PRP8_HUMAN Pre-mRNA-processing-splicing factor 8 OS=Homo sapiens GN=PRPF8 PE=1 SV=2	1344	2034	0	sp|Q6P2Q9|PRP8_HUMAN	sp|Q6P2Q9|PRP8_HUMAN	PRPF8_1344	PRPF8_2034	WSKQTDVGITHFR	QTKEQSQLTATQTR	PRPF8_1344-PRPF8_2034	1344	2034
2967-1-22-1-17-1	L1_20190826_HS_1023_FU_CL1_5.mgf	12618	4	4565.15	1	QTKEQSQLTATQTR	3	2032	>sp|Q6P2Q9|PRP8_HUMAN Pre-mRNA-processing-splicing factor 8 OS=Homo sapiens GN=PRPF8 PE=1 SV=2	1618.83	2.38e-15	7.03e-26	TVNKHGDEIITSTTSNYETQTFSSK	4	2046	>sp|Q6P2Q9|PRP8_HUMAN Pre-mRNA-processing-splicing factor 8 OS=Homo sapiens GN=PRPF8 PE=1 SV=2	2787.32	1e-33	4.9e-50	>sp|Q6P2Q9|PRP8_HUMAN Pre-mRNA-processing-splicing factor 8 OS=Homo sapiens GN=PRPF8 PE=1 SV=2-2034->sp|Q6P2Q9|PRP8_HUMAN Pre-mRNA-processing-splicing factor 8 OS=Homo sapiens GN=PRPF8 PE=1 SV=2-2049	PRPF8	PRPF8	>sp|Q6P2Q9|PRP8_HUMAN Pre-mRNA-processing-splicing factor 8 OS=Homo sapiens GN=PRPF8 PE=1 SV=2	>sp|Q6P2Q9|PRP8_HUMAN Pre-mRNA-processing-splicing factor 8 OS=Homo sapiens GN=PRPF8 PE=1 SV=2	2034	2049	0	sp|Q6P2Q9|PRP8_HUMAN	sp|Q6P2Q9|PRP8_HUMAN	PRPF8_2034	PRPF8_2049	QTKEQSQLTATQTR	TVNKHGDEIITSTTSNYETQTFSSK	PRPF8_2034-PRPF8_2049	2034	2049
2958-1-4-1-7-1	L1_20190826_HS_1023_FU_CL1_7.mgf	12201	5	2949.34	1	KMoLEDPQER	1	204	>sp|Q9BUQ8|DDX23_HUMAN Probable ATP-dependent RNA helicase DDX23 OS=Homo sapiens GN=DDX23 PE=1 SV=3	1160.55	3.08e-13	3.08e-13	GNNPKGYLPSHYER	5	2245	>sp|Q6P2Q9|PRP8_HUMAN Pre-mRNA-processing-splicing factor 8 OS=Homo sapiens GN=PRPF8 PE=1 SV=2	1630.79	5.27e-16	3.62e-32	>sp|Q6P2Q9|PRP8_HUMAN Pre-mRNA-processing-splicing factor 8 OS=Homo sapiens GN=PRPF8 PE=1 SV=2-2249->sp|Q9BUQ8|DDX23_HUMAN Probable ATP-dependent RNA helicase DDX23 OS=Homo sapiens GN=DDX23 PE=1 SV=3-204	DDX23	PRPF8	>sp|Q9BUQ8|DDX23_HUMAN Probable ATP-dependent RNA helicase DDX23 OS=Homo sapiens GN=DDX23 PE=1 SV=3	>sp|Q6P2Q9|PRP8_HUMAN Pre-mRNA-processing-splicing factor 8 OS=Homo sapiens GN=PRPF8 PE=1 SV=2	204	2249	0	sp|Q9BUQ8|DDX23_HUMAN	sp|Q6P2Q9|PRP8_HUMAN	DDX23_204	PRPF8_2249	KMoLEDPQER	GNNPKGYLPSHYER	DDX23_204-PRPF8_2249	204	2249
2252-1-7-1-24-1	L1_20190826_HS_1023_FU_CL1_3.mgf	13998	4	2960.59	1	VSYQKLLK	5	445	>sp|Q6P2Q9|PRP8_HUMAN Pre-mRNA-processing-splicing factor 8 OS=Homo sapiens GN=PRPF8 PE=1 SV=2	977.591	0.000874549	9.84e-15	ALNMoAIPGGPKFEPLVR	11	268	>sp|Q6P2Q9|PRP8_HUMAN Pre-mRNA-processing-splicing factor 8 OS=Homo sapiens GN=PRPF8 PE=1 SV=2	1824.99	1.12e-25	1.12e-25	>sp|Q6P2Q9|PRP8_HUMAN Pre-mRNA-processing-splicing factor 8 OS=Homo sapiens GN=PRPF8 PE=1 SV=2-278->sp|Q6P2Q9|PRP8_HUMAN Pre-mRNA-processing-splicing factor 8 OS=Homo sapiens GN=PRPF8 PE=1 SV=2-449	PRPF8	PRPF8	>sp|Q6P2Q9|PRP8_HUMAN Pre-mRNA-processing-splicing factor 8 OS=Homo sapiens GN=PRPF8 PE=1 SV=2	>sp|Q6P2Q9|PRP8_HUMAN Pre-mRNA-processing-splicing factor 8 OS=Homo sapiens GN=PRPF8 PE=1 SV=2	278	449	0	sp|Q6P2Q9|PRP8_HUMAN	sp|Q6P2Q9|PRP8_HUMAN	PRPF8_278	PRPF8_449	ALNMoAIPGGPKFEPLVR	VSYQKLLK	PRPF8_278-PRPF8_449	278	449
2436-1-7-1-27-1	L1_20190826_HS_1023_FU_CL1_3.mgf	14569	4	3848.92	1	KWQQLQAK	1	36	>sp|Q6P2Q9|PRP8_HUMAN Pre-mRNA-processing-splicing factor 8 OS=Homo sapiens GN=PRPF8 PE=1 SV=2	1028.58	1.15e-06	1.81e-14	GPGNPVPGPLAPLPDYMSEEKLQEK	21	9	>sp|Q6P2Q9|PRP8_HUMAN Pre-mRNA-processing-splicing factor 8 OS=Homo sapiens GN=PRPF8 PE=1 SV=2	2662.33	3.05e-26	1.48e-43	>sp|Q6P2Q9|PRP8_HUMAN Pre-mRNA-processing-splicing factor 8 OS=Homo sapiens GN=PRPF8 PE=1 SV=2-29->sp|Q6P2Q9|PRP8_HUMAN Pre-mRNA-processing-splicing factor 8 OS=Homo sapiens GN=PRPF8 PE=1 SV=2-36	PRPF8	PRPF8	>sp|Q6P2Q9|PRP8_HUMAN Pre-mRNA-processing-splicing factor 8 OS=Homo sapiens GN=PRPF8 PE=1 SV=2	>sp|Q6P2Q9|PRP8_HUMAN Pre-mRNA-processing-splicing factor 8 OS=Homo sapiens GN=PRPF8 PE=1 SV=2	29	36	0	sp|Q6P2Q9|PRP8_HUMAN	sp|Q6P2Q9|PRP8_HUMAN	PRPF8_29	PRPF8_36	GPGNPVPGPLAPLPDYMSEEKLQEK	KWQQLQAK	PRPF8_29-PRPF8_36	29	36
4485-1-6-1-18-1	L1_20190826_HS_1023_FU_CL1_7.mgf	17001	5	3359.6	2	ATKFFQSTK	3	478	>sp|Q6P2Q9|PRP8_HUMAN Pre-mRNA-processing-splicing factor 8 OS=Homo sapiens GN=PRPF8 PE=1 SV=2	1056.56	2.91e-10	2.4e-16	KFGFVDAQKEDMoPPEHVR	1	50	>sp|Q6P2Q9|PRP8_HUMAN Pre-mRNA-processing-splicing factor 8 OS=Homo sapiens GN=PRPF8 PE=1 SV=2	2145.03	5.97e-16	9.32e-29	>sp|Q6P2Q9|PRP8_HUMAN Pre-mRNA-processing-splicing factor 8 OS=Homo sapiens GN=PRPF8 PE=1 SV=2-480->sp|Q6P2Q9|PRP8_HUMAN Pre-mRNA-processing-splicing factor 8 OS=Homo sapiens GN=PRPF8 PE=1 SV=2-50	PRPF8	PRPF8	>sp|Q6P2Q9|PRP8_HUMAN Pre-mRNA-processing-splicing factor 8 OS=Homo sapiens GN=PRPF8 PE=1 SV=2	>sp|Q6P2Q9|PRP8_HUMAN Pre-mRNA-processing-splicing factor 8 OS=Homo sapiens GN=PRPF8 PE=1 SV=2	480	50	0	sp|Q6P2Q9|PRP8_HUMAN	sp|Q6P2Q9|PRP8_HUMAN	PRPF8_480	PRPF8_50	ATKFFQSTK	KFGFVDAQKEDMoPPEHVR	PRPF8_480-PRPF8_50	480	50
6580-1-4-1-25-1	L1_20190826_HS_1023_FU_CL1_7.mgf	23690	5	4154.06	1	KFGFVDAQK	1	50	>sp|Q6P2Q9|PRP8_HUMAN Pre-mRNA-processing-splicing factor 8 OS=Homo sapiens GN=PRPF8 PE=1 SV=2	1038.55	3.21e-10	3.27e-18	LPGHAGSINEVAFHPDEPIIISASSDKR	27	323	>sp|Q96DI7|SNR40_HUMAN U5 small nuclear ribonucleoprotein 40 kDa protein OS=Homo sapiens GN=SNRNP40 PE=1 SV=1	2956.5	5.76e-16	5.57e-36	>sp|Q6P2Q9|PRP8_HUMAN Pre-mRNA-processing-splicing factor 8 OS=Homo sapiens GN=PRPF8 PE=1 SV=2-50->sp|Q96DI7|SNR40_HUMAN U5 small nuclear ribonucleoprotein 40 kDa protein OS=Homo sapiens GN=SNRNP40 PE=1 SV=1-349	PRPF8	SNRNP40	>sp|Q6P2Q9|PRP8_HUMAN Pre-mRNA-processing-splicing factor 8 OS=Homo sapiens GN=PRPF8 PE=1 SV=2	>sp|Q96DI7|SNR40_HUMAN U5 small nuclear ribonucleoprotein 40 kDa protein OS=Homo sapiens GN=SNRNP40 PE=1 SV=1	50	349	0	sp|Q6P2Q9|PRP8_HUMAN	sp|Q96DI7|SNR40_HUMAN	PRPF8_50	SNRNP40_349	KFGFVDAQK	LPGHAGSINEVAFHPDEPIIISASSDKR	PRPF8_50-SNRNP40_349	50	349
6289-1-11-1-30-1	L1_20190826_HS_1023_FU_CL1_8.mgf	22747	6	3237.68	1	TLTTKER	5	529	>sp|Q6P2Q9|PRP8_HUMAN Pre-mRNA-processing-splicing factor 8 OS=Homo sapiens GN=PRPF8 PE=1 SV=2	847.476	6.56e-06	6.2e-15	KNLNYLHLDYNFNLKPVK	1	511	>sp|Q6P2Q9|PRP8_HUMAN Pre-mRNA-processing-splicing factor 8 OS=Homo sapiens GN=PRPF8 PE=1 SV=2	2232.21	2.46e-07	2.69e-29	>sp|Q6P2Q9|PRP8_HUMAN Pre-mRNA-processing-splicing factor 8 OS=Homo sapiens GN=PRPF8 PE=1 SV=2-511->sp|Q6P2Q9|PRP8_HUMAN Pre-mRNA-processing-splicing factor 8 OS=Homo sapiens GN=PRPF8 PE=1 SV=2-533	PRPF8	PRPF8	>sp|Q6P2Q9|PRP8_HUMAN Pre-mRNA-processing-splicing factor 8 OS=Homo sapiens GN=PRPF8 PE=1 SV=2	>sp|Q6P2Q9|PRP8_HUMAN Pre-mRNA-processing-splicing factor 8 OS=Homo sapiens GN=PRPF8 PE=1 SV=2	511	533	0	sp|Q6P2Q9|PRP8_HUMAN	sp|Q6P2Q9|PRP8_HUMAN	PRPF8_511	PRPF8_533	KNLNYLHLDYNFNLKPVK	TLTTKER	PRPF8_511-PRPF8_533	511	533
2653-1-2-1-8-1	L1_20190826_HS_1023_FU_CL1_7.mgf	11187	4	1973.07	1	LKAAFVK	2	458	>sp|Q86YP4-2|P66A_HUMAN Isoform 2 of Transcriptional repressor p66-alpha OS=Homo sapiens GN=GATAD2A,>sp|Q86YP4|P66A_HUMAN Transcriptional repressor p66-alpha OS=Homo sapiens GN=GATAD2A PE=1 SV=1,>sp|Q86YP4-3|P66A_HUMAN Isoform 3 of Transcriptional repressor p66-alpha OS=Homo sapiens GN=GATAD2A	775.496	8.48e-08	2.68e-14	ALKVEHTSR	3	449	>sp|Q86YP4-2|P66A_HUMAN Isoform 2 of Transcriptional repressor p66-alpha OS=Homo sapiens GN=GATAD2A,>sp|Q86YP4|P66A_HUMAN Transcriptional repressor p66-alpha OS=Homo sapiens GN=GATAD2A PE=1 SV=1,>sp|Q86YP4-3|P66A_HUMAN Isoform 3 of Transcriptional repressor p66-alpha OS=Homo sapiens GN=GATAD2A	1039.58	2.97e-11	1.18e-18	>sp|Q86YP4-2|P66A_HUMAN Isoform 2 of Transcriptional repressor p66-alpha OS=Homo sapiens GN=GATAD2A,>sp|Q86YP4|P66A_HUMAN Transcriptional repressor p66-alpha OS=Homo sapiens GN=GATAD2A PE=1 SV=1,>sp|Q86YP4-3|P66A_HUMAN Isoform 3 of Transcriptional repressor p66-alpha OS=Homo sapiens GN=GATAD2A-451->sp|Q86YP4-2|P66A_HUMAN Isoform 2 of Transcriptional repressor p66-alpha OS=Homo sapiens GN=GATAD2A,…	GATAD2A	GATAD2A	>sp|Q86YP4-2|P66A_HUMAN Isoform 2 of Transcriptional repressor p66-alpha OS=Homo sapiens GN=GATAD2A	>sp|Q86YP4-2|P66A_HUMAN Isoform 2 of Transcriptional repressor p66-alpha OS=Homo sapiens GN=GATAD2A	451	459	1	sp|Q86YP4-2|P66A_HUMAN	sp|Q86YP4-2|P66A_HUMAN	GATAD2A_451	GATAD2A_459	ALKVEHTSR	LKAAFVK	GATAD2A_451-GATAD2A_459	451	459
3553-1-10-1-10-1	L1_20190826_HS_1023_FU_CL1_7.mgf	14124	4	2886.44	2	GSPVNALQNKR	10	406	>sp|Q8NI27|THOC2_HUMAN THO complex subunit 2 OS=Homo sapiens GN=THOC2 PE=1 SV=2,>tr|A0A0C4DG98|A0A0C4DG98_HUMAN THO complex subunit 2 OS=Homo sapiens GN=THOC2 PE=1 SV=1	1182.65	6.19e-22	2.53e-31	APKQAESFEDLRR	3	417	>sp|Q8NI27|THOC2_HUMAN THO complex subunit 2 OS=Homo sapiens GN=THOC2 PE=1 SV=2,>tr|A0A0C4DG98|A0A0C4DG98_HUMAN THO complex subunit 2 OS=Homo sapiens GN=THOC2 PE=1 SV=1	1545.79	1	1.46e-18	>sp|Q8NI27|THOC2_HUMAN THO complex subunit 2 OS=Homo sapiens GN=THOC2 PE=1 SV=2,>tr|A0A0C4DG98|A0A0C4DG98_HUMAN THO complex subunit 2 OS=Homo sapiens GN=THOC2 PE=1 SV=1-415->sp|Q8NI27|THOC2_HUMAN THO complex subunit 2 OS=Homo sapiens GN=THOC2 PE=1 SV=2,>tr|A0A0C4DG98|A0A0C4DG98_HUMAN THO complex subunit 2 OS=Homo sapiens GN=THOC2 PE=1 SV=1-419	THOC2	THOC2	>sp|Q8NI27|THOC2_HUMAN THO complex subunit 2 OS=Homo sapiens GN=THOC2 PE=1 SV=2	>sp|Q8NI27|THOC2_HUMAN THO complex subunit 2 OS=Homo sapiens GN=THOC2 PE=1 SV=2	415	419	1	sp|Q8NI27|THOC2_HUMAN	sp|Q8NI27|THOC2_HUMAN	THOC2_415	THOC2_419	GSPVNALQNKR	APKQAESFEDLRR	THOC2_415-THOC2_419	415	419
1843-1-8-1-3-1	L1_20190826_HS_1023_FU_CL1_5.mgf	8582	4	2367.12	4	STKIYTPGR	3	1201	>sp|Q92620|PRP16_HUMAN Pre-mRNA-splicing factor ATP-dependent RNA helicase PRP16 OS=Homo sapiens GN=DHX38 PE=1 SV=2	1021.56	1.01e-08	1.94e-15	KEQGEPMoTPR	1	1210	>sp|Q92620|PRP16_HUMAN Pre-mRNA-splicing factor ATP-dependent RNA helicase PRP16 OS=Homo sapiens GN=DHX38 PE=1 SV=2	1187.56	4.02e-16	9.64e-25	>sp|Q92620|PRP16_HUMAN Pre-mRNA-splicing factor ATP-dependent RNA helicase PRP16 OS=Homo sapiens GN=DHX38 PE=1 SV=2-1203->sp|Q92620|PRP16_HUMAN Pre-mRNA-splicing factor ATP-dependent RNA helicase PRP16 OS=Homo sapiens GN=DHX38 PE=1 SV=2-1210	DHX38	DHX38	>sp|Q92620|PRP16_HUMAN Pre-mRNA-splicing factor ATP-dependent RNA helicase PRP16 OS=Homo sapiens GN=DHX38 PE=1 SV=2	>sp|Q92620|PRP16_HUMAN Pre-mRNA-splicing factor ATP-dependent RNA helicase PRP16 OS=Homo sapiens GN=DHX38 PE=1 SV=2	1203	1210	0	sp|Q92620|PRP16_HUMAN	sp|Q92620|PRP16_HUMAN	DHX38_1203	DHX38_1210	STKIYTPGR	KEQGEPMoTPR	DHX38_1203-DHX38_1210	1203	1210
2342-1-6-1-24-1	L1_20190826_HS_1023_FU_CL1_7.mgf	10136	5	3348.54	1	KSEASSEFAK	1	512	>sp|Q92620|PRP16_HUMAN Pre-mRNA-splicing factor ATP-dependent RNA helicase PRP16 OS=Homo sapiens GN=DHX38 PE=1 SV=2	1082.52	1.77e-05	1.1e-11	KEEEPDKAVTEDGKVDYR	7	483	>sp|Q92620|PRP16_HUMAN Pre-mRNA-splicing factor ATP-dependent RNA helicase PRP16 OS=Homo sapiens GN=DHX38 PE=1 SV=2	2107.01	1	4.83e-20	>sp|Q92620|PRP16_HUMAN Pre-mRNA-splicing factor ATP-dependent RNA helicase PRP16 OS=Homo sapiens GN=DHX38 PE=1 SV=2-489->sp|Q92620|PRP16_HUMAN Pre-mRNA-splicing factor ATP-dependent RNA helicase PRP16 OS=Homo sapiens GN=DHX38 PE=1 SV=2-512	DHX38	DHX38	>sp|Q92620|PRP16_HUMAN Pre-mRNA-splicing factor ATP-dependent RNA helicase PRP16 OS=Homo sapiens GN=DHX38 PE=1 SV=2	>sp|Q92620|PRP16_HUMAN Pre-mRNA-splicing factor ATP-dependent RNA helicase PRP16 OS=Homo sapiens GN=DHX38 PE=1 SV=2	489	512	0	sp|Q92620|PRP16_HUMAN	sp|Q92620|PRP16_HUMAN	DHX38_489	DHX38_512	KEEEPDKAVTEDGKVDYR	KSEASSEFAK	DHX38_489-DHX38_512	489	512
4979-1-5-1-9-1	L1_20190826_HS_1023_FU_CL1_7.mgf	18499	5	2826.39	1	QNKLTYTMoR	3	224	>sp|Q96DI7|SNR40_HUMAN U5 small nuclear ribonucleoprotein 40 kDa protein OS=Homo sapiens GN=SNRNP40 PE=1 SV=1,>sp|Q96DI7-2|SNR40_HUMAN Isoform 2 of U5 small nuclear ribonucleoprotein 40 kDa protein OS=Homo sapiens GN=SNRNP40	1169.59	3.18e-05	6.82e-12	VWDVRPFAPKER	10	261	>sp|Q96DI7|SNR40_HUMAN U5 small nuclear ribonucleoprotein 40 kDa protein OS=Homo sapiens GN=SNRNP40 PE=1 SV=1,>sp|Q96DI7-2|SNR40_HUMAN Isoform 2 of U5 small nuclear ribonucleoprotein 40 kDa protein OS=Homo sapiens GN=SNRNP40	1498.8	1.02e-06	2.76e-18	>sp|Q96DI7|SNR40_HUMAN U5 small nuclear ribonucleoprotein 40 kDa protein OS=Homo sapiens GN=SNRNP40 PE=1 SV=1,>sp|Q96DI7-2|SNR40_HUMAN Isoform 2 of U5 small nuclear ribonucleoprotein 40 kDa protein OS=Homo sapiens GN=SNRNP40-226->sp|Q96DI7|SNR40_HUMAN U5 small nuclear ribonucleoprotein 40 kDa protein OS=Homo sapiens GN=SNRNP40 PE=1 SV=1,>sp|Q96DI7-2|SNR40_HUMAN Isoform 2 of U5 small nuclear ribon…	SNRNP40	SNRNP40	>sp|Q96DI7|SNR40_HUMAN U5 small nuclear ribonucleoprotein 40 kDa protein OS=Homo sapiens GN=SNRNP40 PE=1 SV=1	>sp|Q96DI7|SNR40_HUMAN U5 small nuclear ribonucleoprotein 40 kDa protein OS=Homo sapiens GN=SNRNP40 PE=1 SV=1	1	270	1	sp|Q96DI7|SNR40_HUMAN	sp|Q96DI7|SNR40_HUMAN	SNRNP40_1	SNRNP40_270	QNKLTYTMoR	VWDVRPFAPKER	SNRNP40_1-SNRNP40_270	1	270
4664-1-8-1-100-1	L1_20190826_HS_1023_FU_CL1_7.mgf	17552	4	2721.3	1	PFAPKER	5	266	>sp|Q96DI7|SNR40_HUMAN U5 small nuclear ribonucleoprotein 40 kDa protein OS=Homo sapiens GN=SNRNP40 PE=1 SV=1,>sp|Q96DI7-2|SNR40_HUMAN Isoform 2 of U5 small nuclear ribonucleoprotein 40 kDa protein OS=Homo sapiens GN=SNRNP40	843.46	4.53e-06	2.16e-18	CVKIFQGNVHNFEK	3	273	>sp|Q96DI7|SNR40_HUMAN U5 small nuclear ribonucleoprotein 40 kDa protein OS=Homo sapiens GN=SNRNP40 PE=1 SV=1,>sp|Q96DI7-2|SNR40_HUMAN Isoform 2 of U5 small nuclear ribonucleoprotein 40 kDa protein OS=Homo sapiens GN=SNRNP40	1718.86	2.47e-14	2.42e-36	>sp|Q96DI7|SNR40_HUMAN U5 small nuclear ribonucleoprotein 40 kDa protein OS=Homo sapiens GN=SNRNP40 PE=1 SV=1,>sp|Q96DI7-2|SNR40_HUMAN Isoform 2 of U5 small nuclear ribonucleoprotein 40 kDa protein OS=Homo sapiens GN=SNRNP40-270->sp|Q96DI7|SNR40_HUMAN U5 small nuclear ribonucleoprotein 40 kDa protein OS=Homo sapiens GN=SNRNP40 PE=1 SV=1,>sp|Q96DI7-2|SNR40_HUMAN Isoform 2 of U5 small nuclear ribon…	SNRNP40	SNRNP40	>sp|Q96DI7|SNR40_HUMAN U5 small nuclear ribonucleoprotein 40 kDa protein OS=Homo sapiens GN=SNRNP40 PE=1 SV=1	>sp|Q96DI7|SNR40_HUMAN U5 small nuclear ribonucleoprotein 40 kDa protein OS=Homo sapiens GN=SNRNP40 PE=1 SV=1	270	275	1	sp|Q96DI7|SNR40_HUMAN	sp|Q96DI7|SNR40_HUMAN	SNRNP40_270	SNRNP40_275	PFAPKER	CVKIFQGNVHNFEK	SNRNP40_270-SNRNP40_275	270	275
6156-1-7-1-100-1	L1_20190826_HS_1023_FU_CL1_7.mgf	22123	6	3209.67	1	KGPELPLVPVKR	1	8	>sp|Q96DI7|SNR40_HUMAN U5 small nuclear ribonucleoprotein 40 kDa protein OS=Homo sapiens GN=SNRNP40 PE=1 SV=1,>sp|Q96DI7-2|SNR40_HUMAN Isoform 2 of U5 small nuclear ribonucleoprotein 40 kDa protein OS=Homo sapiens GN=SNRNP40	1331.83	3.71e-13	9.24e-32	CVKIFQGNVHNFEK	3	273	>sp|Q96DI7|SNR40_HUMAN U5 small nuclear ribonucleoprotein 40 kDa protein OS=Homo sapiens GN=SNRNP40 PE=1 SV=1,>sp|Q96DI7-2|SNR40_HUMAN Isoform 2 of U5 small nuclear ribonucleoprotein 40 kDa protein OS=Homo sapiens GN=SNRNP40	1718.86	9.8e-05	5.34e-26	>sp|Q96DI7|SNR40_HUMAN U5 small nuclear ribonucleoprotein 40 kDa protein OS=Homo sapiens GN=SNRNP40 PE=1 SV=1,>sp|Q96DI7-2|SNR40_HUMAN Isoform 2 of U5 small nuclear ribonucleoprotein 40 kDa protein OS=Homo sapiens GN=SNRNP40-275->sp|Q96DI7|SNR40_HUMAN U5 small nuclear ribonucleoprotein 40 kDa protein OS=Homo sapiens GN=SNRNP40 PE=1 SV=1,>sp|Q96DI7-2|SNR40_HUMAN Isoform 2 of U5 small nuclear ribon…	SNRNP40	SNRNP40	>sp|Q96DI7|SNR40_HUMAN U5 small nuclear ribonucleoprotein 40 kDa protein OS=Homo sapiens GN=SNRNP40 PE=1 SV=1	>sp|Q96DI7|SNR40_HUMAN U5 small nuclear ribonucleoprotein 40 kDa protein OS=Homo sapiens GN=SNRNP40 PE=1 SV=1	275	8	1	sp|Q96DI7|SNR40_HUMAN	sp|Q96DI7|SNR40_HUMAN	SNRNP40_275	SNRNP40_8	CVKIFQGNVHNFEK	KGPELPLVPVKR	SNRNP40_275-SNRNP40_8	275	8
2436-1-10-1-4-1	L1_20190826_HS_1023_FU_CL1_5.mgf	10652	4	2309.08	1	KQFQDLGR	1	196	>sp|Q9BUQ8|DDX23_HUMAN Probable ATP-dependent RNA helicase DDX23 OS=Homo sapiens GN=DDX23 PE=1 SV=3	990.525	8.99e-18	4.28e-26	KMoLEDPQER	1	204	>sp|Q9BUQ8|DDX23_HUMAN Probable ATP-dependent RNA helicase DDX23 OS=Homo sapiens GN=DDX23 PE=1 SV=3	1160.55	1.36e-14	1.36e-14	>sp|Q9BUQ8|DDX23_HUMAN Probable ATP-dependent RNA helicase DDX23 OS=Homo sapiens GN=DDX23 PE=1 SV=3-196->sp|Q9BUQ8|DDX23_HUMAN Probable ATP-dependent RNA helicase DDX23 OS=Homo sapiens GN=DDX23 PE=1 SV=3-204	DDX23	DDX23	>sp|Q9BUQ8|DDX23_HUMAN Probable ATP-dependent RNA helicase DDX23 OS=Homo sapiens GN=DDX23 PE=1 SV=3	>sp|Q9BUQ8|DDX23_HUMAN Probable ATP-dependent RNA helicase DDX23 OS=Homo sapiens GN=DDX23 PE=1 SV=3	196	204	0	sp|Q9BUQ8|DDX23_HUMAN	sp|Q9BUQ8|DDX23_HUMAN	DDX23_196	DDX23_204	KQFQDLGR	KMoLEDPQER	DDX23_196-DDX23_204	196	204
2625-1-2-1-7-1	L1_20190826_HS_1023_FU_CL1_5.mgf	11426	4	2692.2	1	FYGDLMoEKR	8	319	>sp|Q9BUQ8|DDX23_HUMAN Probable ATP-dependent RNA helicase DDX23 OS=Homo sapiens GN=DDX23 PE=1 SV=3	1173.55	2.68e-15	7.2e-24	TLEEKEQEEAR	5	329	>sp|Q9BUQ8|DDX23_HUMAN Probable ATP-dependent RNA helicase DDX23 OS=Homo sapiens GN=DDX23 PE=1 SV=3	1360.65	1.89e-21	3e-31	>sp|Q9BUQ8|DDX23_HUMAN Probable ATP-dependent RNA helicase DDX23 OS=Homo sapiens GN=DDX23 PE=1 SV=3-326->sp|Q9BUQ8|DDX23_HUMAN Probable ATP-dependent RNA helicase DDX23 OS=Homo sapiens GN=DDX23 PE=1 SV=3-333	DDX23	DDX23	>sp|Q9BUQ8|DDX23_HUMAN Probable ATP-dependent RNA helicase DDX23 OS=Homo sapiens GN=DDX23 PE=1 SV=3	>sp|Q9BUQ8|DDX23_HUMAN Probable ATP-dependent RNA helicase DDX23 OS=Homo sapiens GN=DDX23 PE=1 SV=3	326	333	0	sp|Q9BUQ8|DDX23_HUMAN	sp|Q9BUQ8|DDX23_HUMAN	DDX23_326	DDX23_333	FYGDLMoEKR	TLEEKEQEEAR	DDX23_326-DDX23_333	326	333
4014-1-19-1-17-1	L1_20190826_HS_1023_FU_CL1_6.mgf	15962	5	3536.64	1	AGAKDILVATDVAGR	4	712	>sp|Q9BUQ8|DDX23_HUMAN Probable ATP-dependent RNA helicase DDX23 OS=Homo sapiens GN=DDX23 PE=1 SV=3	1455.8	5.66e-23	5.36e-37	MoGYNACTLHGGKGQEQR	12	687	>sp|Q9BUQ8|DDX23_HUMAN Probable ATP-dependent RNA helicase DDX23 OS=Homo sapiens GN=DDX23 PE=1 SV=3	1921.85	8.7e-08	2.29e-23	>sp|Q9BUQ8|DDX23_HUMAN Probable ATP-dependent RNA helicase DDX23 OS=Homo sapiens GN=DDX23 PE=1 SV=3-698->sp|Q9BUQ8|DDX23_HUMAN Probable ATP-dependent RNA helicase DDX23 OS=Homo sapiens GN=DDX23 PE=1 SV=3-715	DDX23	DDX23	>sp|Q9BUQ8|DDX23_HUMAN Probable ATP-dependent RNA helicase DDX23 OS=Homo sapiens GN=DDX23 PE=1 SV=3	>sp|Q9BUQ8|DDX23_HUMAN Probable ATP-dependent RNA helicase DDX23 OS=Homo sapiens GN=DDX23 PE=1 SV=3	698	715	0	sp|Q9BUQ8|DDX23_HUMAN	sp|Q9BUQ8|DDX23_HUMAN	DDX23_698	DDX23_715	MoGYNACTLHGGKGQEQR	AGAKDILVATDVAGR	DDX23_698-DDX23_715	698	715
5723-1-13-1-21-1	L1_20190826_HS_1023_FU_CL1_5.mgf	21770	4	2637.36	1	LNVKWGR	4	249	>sp|Q9NW64-2|RBM22_HUMAN Isoform 2 of Pre-mRNA-splicing factor RBM22 OS=Homo sapiens GN=RBM22,>sp|Q9NW64|RBM22_HUMAN Pre-mRNA-splicing factor RBM22 OS=Homo sapiens GN=RBM22 PE=1 SV=1	871.503	5.81e-08	2.32e-14	YYGINDPVADKLLK	11	153	>sp|Q9NW64-2|RBM22_HUMAN Isoform 2 of Pre-mRNA-splicing factor RBM22 OS=Homo sapiens GN=RBM22,>sp|Q9NW64|RBM22_HUMAN Pre-mRNA-splicing factor RBM22 OS=Homo sapiens GN=RBM22 PE=1 SV=1	1607.86	2.29e-22	1.66e-35	>sp|Q9NW64-2|RBM22_HUMAN Isoform 2 of Pre-mRNA-splicing factor RBM22 OS=Homo sapiens GN=RBM22,>sp|Q9NW64|RBM22_HUMAN Pre-mRNA-splicing factor RBM22 OS=Homo sapiens GN=RBM22 PE=1 SV=1-163->sp|Q9NW64-2|RBM22_HUMAN Isoform 2 of Pre-mRNA-splicing factor RBM22 OS=Homo sapiens GN=RBM22,>sp|Q9NW64|RBM22_HUMAN Pre-mRNA-splicing factor RBM22 OS=Homo sapiens GN=RBM22 PE=1 SV=1-252	RBM22	RBM22	>sp|Q9NW64-2|RBM22_HUMAN Isoform 2 of Pre-mRNA-splicing factor RBM22 OS=Homo sapiens GN=RBM22	>sp|Q9NW64-2|RBM22_HUMAN Isoform 2 of Pre-mRNA-splicing factor RBM22 OS=Homo sapiens GN=RBM22	163	252	1	sp|Q9NW64-2|RBM22_HUMAN	sp|Q9NW64-2|RBM22_HUMAN	RBM22_163	RBM22_252	YYGINDPVADKLLK	LNVKWGR	RBM22_163-RBM22_252	163	252
3056-1-35-1-22-1	L1_20190826_HS_1023_FU_CL1_6.mgf	12886	4	3041.41	2	NTEEEGLKYK	8	428	>sp|Q9NYF8-2|BCLF1_HUMAN Isoform 2 of Bcl-2-associated transcription factor 1 OS=Homo sapiens GN=BCLAF1,>sp|Q9NYF8|BCLF1_HUMAN Bcl-2-associated transcription factor 1 OS=Homo sapiens GN=BCLAF1 PE=1 SV=2	1209.59	5.63e-14	5.63e-14	SVLADQGKSFATASHR	8	412	>sp|Q9NYF8-2|BCLF1_HUMAN Isoform 2 of Bcl-2-associated transcription factor 1 OS=Homo sapiens GN=BCLAF1,>sp|Q9NYF8|BCLF1_HUMAN Bcl-2-associated transcription factor 1 OS=Homo sapiens GN=BCLAF1 PE=1 SV=2	1673.85	3.75e-12	5.95e-23	>sp|Q9NYF8-2|BCLF1_HUMAN Isoform 2 of Bcl-2-associated transcription factor 1 OS=Homo sapiens GN=BCLAF1,>sp|Q9NYF8|BCLF1_HUMAN Bcl-2-associated transcription factor 1 OS=Homo sapiens GN=BCLAF1 PE=1 SV=2-419->sp|Q9NYF8-2|BCLF1_HUMAN Isoform 2 of Bcl-2-associated transcription factor 1 OS=Homo sapiens GN=BCLAF1,>sp|Q9NYF8|BCLF1_HUMAN Bcl-2-associated transcription factor 1 OS=Homo sapiens GN=BCLAF1…	BCLAF1	BCLAF1	>sp|Q9NYF8-2|BCLF1_HUMAN Isoform 2 of Bcl-2-associated transcription factor 1 OS=Homo sapiens GN=BCLAF1	>sp|Q9NYF8-2|BCLF1_HUMAN Isoform 2 of Bcl-2-associated transcription factor 1 OS=Homo sapiens GN=BCLAF1	419	435	1	sp|Q9NYF8-2|BCLF1_HUMAN	sp|Q9NYF8-2|BCLF1_HUMAN	BCLAF1_419	BCLAF1_435	SVLADQGKSFATASHR	NTEEEGLKYK	BCLAF1_419-BCLAF1_435	419	435
2577-1-18-1-28-1	L1_20190826_HS_1023_FU_CL1_6.mgf	11271	5	2637.37	1	VSLKGNR	4	440	>sp|Q9NYF8-2|BCLF1_HUMAN Isoform 2 of Bcl-2-associated transcription factor 1 OS=Homo sapiens GN=BCLAF1,>sp|Q9NYF8|BCLF1_HUMAN Bcl-2-associated transcription factor 1 OS=Homo sapiens GN=BCLAF1 PE=1 SV=2	772.456	7.18e-10	8.57e-18	LKETGYVVERPSTTK	2	459	>sp|Q9NYF8-2|BCLF1_HUMAN Isoform 2 of Bcl-2-associated transcription factor 1 OS=Homo sapiens GN=BCLAF1,>sp|Q9NYF8|BCLF1_HUMAN Bcl-2-associated transcription factor 1 OS=Homo sapiens GN=BCLAF1 PE=1 SV=2	1706.92	1.41e-07	1.28e-23	>sp|Q9NYF8-2|BCLF1_HUMAN Isoform 2 of Bcl-2-associated transcription factor 1 OS=Homo sapiens GN=BCLAF1,>sp|Q9NYF8|BCLF1_HUMAN Bcl-2-associated transcription factor 1 OS=Homo sapiens GN=BCLAF1 PE=1 SV=2-443->sp|Q9NYF8-2|BCLF1_HUMAN Isoform 2 of Bcl-2-associated transcription factor 1 OS=Homo sapiens GN=BCLAF1,>sp|Q9NYF8|BCLF1_HUMAN Bcl-2-associated transcription factor 1 OS=Homo sapiens GN=BCLAF1…	BCLAF1	BCLAF1	>sp|Q9NYF8-2|BCLF1_HUMAN Isoform 2 of Bcl-2-associated transcription factor 1 OS=Homo sapiens GN=BCLAF1	>sp|Q9NYF8-2|BCLF1_HUMAN Isoform 2 of Bcl-2-associated transcription factor 1 OS=Homo sapiens GN=BCLAF1	443	460	1	sp|Q9NYF8-2|BCLF1_HUMAN	sp|Q9NYF8-2|BCLF1_HUMAN	BCLAF1_443	BCLAF1_460	VSLKGNR	LKETGYVVERPSTTK	BCLAF1_443-BCLAF1_460	443	460
4086-1-20-1-20-1	L1_20190826_HS_1023_FU_CL1_7.mgf	15776	4	3768.89	1	ANLTKAAEHEVPLQER	5	223	>sp|Q9P260-2|K1468_HUMAN Isoform 2 of LisH domain and HEAT repeat-containing protein KIAA1468 OS=Homo sapiens GN=KIAA1468,>sp|Q9P260|K1468_HUMAN LisH domain and HEAT repeat-containing protein KIAA1468 OS=Homo sapiens GN=KIAA1468 PE=1 SV=2,>tr|A0A075B785|A0A075B785_HUMAN LisH domain and HEAT repeat-containing protein KIAA1468 OS=Homo sapiens GN=KIAA1468 PE=1 SV=7	1804.94	7.46e-05	3.56e-17	ANLTKAAEHEVPLQER	5	223	>sp|Q9P260-2|K1468_HUMAN Isoform 2 of LisH domain and HEAT repeat-containing protein KIAA1468 OS=Homo sapiens GN=KIAA1468,>sp|Q9P260|K1468_HUMAN LisH domain and HEAT repeat-containing protein KIAA1468 OS=Homo sapiens GN=KIAA1468 PE=1 SV=2,>tr|A0A075B785|A0A075B785_HUMAN LisH domain and HEAT repeat-containing protein KIAA1468 OS=Homo sapiens GN=KIAA1468 PE=1 SV=7	1804.94	7.46e-05	3.56e-17	>sp|Q9P260-2|K1468_HUMAN Isoform 2 of LisH domain and HEAT repeat-containing protein KIAA1468 OS=Homo sapiens GN=KIAA1468,>sp|Q9P260|K1468_HUMAN LisH domain and HEAT repeat-containing protein KIAA1468 OS=Homo sapiens GN=KIAA1468 PE=1 SV=2,>tr|A0A075B785|A0A075B785_HUMAN LisH domain and HEAT repeat-containing protein KIAA1468 OS=Homo sapiens GN=KIAA1468 PE=1 SV=7-227->sp|Q9P260-2|K1468_HUMAN Isofo…	KIAA1468	KIAA1468	>sp|Q9P260-2|K1468_HUMAN Isoform 2 of LisH domain and HEAT repeat-containing protein KIAA1468 OS=Homo sapiens GN=KIAA1468	>sp|Q9P260-2|K1468_HUMAN Isoform 2 of LisH domain and HEAT repeat-containing protein KIAA1468 OS=Homo sapiens GN=KIAA1468	227	227	1	sp|Q9P260-2|K1468_HUMAN	sp|Q9P260-2|K1468_HUMAN	KIAA1468_227	KIAA1468_227	ANLTKAAEHEVPLQER	ANLTKAAEHEVPLQER	KIAA1468_227-KIAA1468_227	227	227
8238-1-34-1-29-1	L1_20190826_HS_1023_FU_CL1_8.mgf	29027	5	4794.45	1	VPLINELESAIHQLYKQR	16	462	>sp|Q9Y5B6|PAXB1_HUMAN PAX3- and PAX7-binding protein 1 OS=Homo sapiens GN=PAXBP1 PE=1 SV=2,>sp|Q9Y5B6-2|PAXB1_HUMAN Isoform 2 of PAX3- and PAX7-binding protein 1 OS=Homo sapiens GN=PAXBP1	2150.18	0.0116278	1.18e-18	HNVPDDGLPLQSQQLPQSGKEAK	20	289	>sp|Q9UBB9|TFP11_HUMAN Tuftelin-interacting protein 11 OS=Homo sapiens GN=TFIP11 PE=1 SV=1	2485.26	7.34e-13	2.78e-19	>sp|Q9UBB9|TFP11_HUMAN Tuftelin-interacting protein 11 OS=Homo sapiens GN=TFIP11 PE=1 SV=1-308->sp|Q9Y5B6|PAXB1_HUMAN PAX3- and PAX7-binding protein 1 OS=Homo sapiens GN=PAXBP1 PE=1 SV=2,>sp|Q9Y5B6-2|PAXB1_HUMAN Isoform 2 of PAX3- and PAX7-binding protein 1 OS=Homo sapiens GN=PAXBP1-477	PAXBP1	TFIP11	>sp|Q9Y5B6|PAXB1_HUMAN PAX3- and PAX7-binding protein 1 OS=Homo sapiens GN=PAXBP1 PE=1 SV=2	>sp|Q9UBB9|TFP11_HUMAN Tuftelin-interacting protein 11 OS=Homo sapiens GN=TFIP11 PE=1 SV=1	477	308	1	sp|Q9Y5B6|PAXB1_HUMAN	sp|Q9UBB9|TFP11_HUMAN	PAXBP1_477	TFIP11_308	VPLINELESAIHQLYKQR	HNVPDDGLPLQSQQLPQSGKEAK	PAXBP1_477-TFIP11_308	477	308
1375-1-25-1-20-1	L1_20190826_HS_1023_FU_CL1_4.mgf	8935	4	2519.33	1	LTKEVTAAR	3	120	>sp|Q9UMS4|PRP19_HUMAN Pre-mRNA-processing factor 19 OS=Homo sapiens GN=PRPF19 PE=1 SV=1	987.571	9.58e-10	2.06e-16	LQDKATVLTTER	4	176	>sp|Q9UMS4|PRP19_HUMAN Pre-mRNA-processing factor 19 OS=Homo sapiens GN=PRPF19 PE=1 SV=1	1373.75	2.56e-17	4.39e-27	>sp|Q9UMS4|PRP19_HUMAN Pre-mRNA-processing factor 19 OS=Homo sapiens GN=PRPF19 PE=1 SV=1-122->sp|Q9UMS4|PRP19_HUMAN Pre-mRNA-processing factor 19 OS=Homo sapiens GN=PRPF19 PE=1 SV=1-179	PRPF19	PRPF19	>sp|Q9UMS4|PRP19_HUMAN Pre-mRNA-processing factor 19 OS=Homo sapiens GN=PRPF19 PE=1 SV=1	>sp|Q9UMS4|PRP19_HUMAN Pre-mRNA-processing factor 19 OS=Homo sapiens GN=PRPF19 PE=1 SV=1	122	179	0	sp|Q9UMS4|PRP19_HUMAN	sp|Q9UMS4|PRP19_HUMAN	PRPF19_122	PRPF19_179	LTKEVTAAR	LQDKATVLTTER	PRPF19_122-PRPF19_179	122	179
3600-1-15-1-13-1	L1_20190826_HS_1023_FU_CL1_7.mgf	14271	5	3142.54	1	ENIKQIVK	4	880	>sp|Q9Y5B6|PAXB1_HUMAN PAX3- and PAX7-binding protein 1 OS=Homo sapiens GN=PAXBP1 PE=1 SV=2	970.581	6.23e-10	3.25e-18	ALDHAMoSVASDHNVKEFK	15	894	>sp|Q9Y5B6|PAXB1_HUMAN PAX3- and PAX7-binding protein 1 OS=Homo sapiens GN=PAXBP1 PE=1 SV=2	2013.96	2.49e-07	9.29e-28	>sp|Q9Y5B6|PAXB1_HUMAN PAX3- and PAX7-binding protein 1 OS=Homo sapiens GN=PAXBP1 PE=1 SV=2-883->sp|Q9Y5B6|PAXB1_HUMAN PAX3- and PAX7-binding protein 1 OS=Homo sapiens GN=PAXBP1 PE=1 SV=2-908	PAXBP1	PAXBP1	>sp|Q9Y5B6|PAXB1_HUMAN PAX3- and PAX7-binding protein 1 OS=Homo sapiens GN=PAXBP1 PE=1 SV=2	>sp|Q9Y5B6|PAXB1_HUMAN PAX3- and PAX7-binding protein 1 OS=Homo sapiens GN=PAXBP1 PE=1 SV=2	883	908	0	sp|Q9Y5B6|PAXB1_HUMAN	sp|Q9Y5B6|PAXB1_HUMAN	PAXBP1_883	PAXBP1_908	ENIKQIVK	ALDHAMoSVASDHNVKEFK	PAXBP1_883-PAXBP1_908	883	908
2145-1-2-1-9-1	L1_20190826_HS_1023_FU_CL1_4.mgf	11967	4	2448.23	2	SGLKPPLR	4	361	>sp|Q9Y6A5|TACC3_HUMAN Transforming acidic coiled-coil-containing protein 3 OS=Homo sapiens GN=TACC3 PE=1 SV=1	866.534	1.77e-05	3.79e-12	LEFDVSDGATSKR	12	338	>sp|Q9Y6A5|TACC3_HUMAN Transforming acidic coiled-coil-containing protein 3 OS=Homo sapiens GN=TACC3 PE=1 SV=1	1423.69	3.26e-18	1.07e-28	>sp|Q9Y6A5|TACC3_HUMAN Transforming acidic coiled-coil-containing protein 3 OS=Homo sapiens GN=TACC3 PE=1 SV=1-349->sp|Q9Y6A5|TACC3_HUMAN Transforming acidic coiled-coil-containing protein 3 OS=Homo sapiens GN=TACC3 PE=1 SV=1-364	TACC3	TACC3	>sp|Q9Y6A5|TACC3_HUMAN Transforming acidic coiled-coil-containing protein 3 OS=Homo sapiens GN=TACC3 PE=1 SV=1	>sp|Q9Y6A5|TACC3_HUMAN Transforming acidic coiled-coil-containing protein 3 OS=Homo sapiens GN=TACC3 PE=1 SV=1	349	364	0	sp|Q9Y6A5|TACC3_HUMAN	sp|Q9Y6A5|TACC3_HUMAN	TACC3_349	TACC3_364	LEFDVSDGATSKR	SGLKPPLR	TACC3_349-TACC3_364	349	364
4536-1-15-1-22-1	L1_20190826_HS_1023_FU_CL1_8.mgf	17316	4	3492.73	1	YQALKAHAEEK	5	764	>sp|Q9Y6A5|TACC3_HUMAN Transforming acidic coiled-coil-containing protein 3 OS=Homo sapiens GN=TACC3 PE=1 SV=1	1286.66	4.1e-10	8.24e-22	AHAEEKLQLANEEIAQVR	6	769	>sp|Q9Y6A5|TACC3_HUMAN Transforming acidic coiled-coil-containing protein 3 OS=Homo sapiens GN=TACC3 PE=1 SV=1	2048.07	7.71e-26	1.25e-36	>sp|Q9Y6A5|TACC3_HUMAN Transforming acidic coiled-coil-containing protein 3 OS=Homo sapiens GN=TACC3 PE=1 SV=1-768->sp|Q9Y6A5|TACC3_HUMAN Transforming acidic coiled-coil-containing protein 3 OS=Homo sapiens GN=TACC3 PE=1 SV=1-774	TACC3	TACC3	>sp|Q9Y6A5|TACC3_HUMAN Transforming acidic coiled-coil-containing protein 3 OS=Homo sapiens GN=TACC3 PE=1 SV=1	>sp|Q9Y6A5|TACC3_HUMAN Transforming acidic coiled-coil-containing protein 3 OS=Homo sapiens GN=TACC3 PE=1 SV=1	768	774	0	sp|Q9Y6A5|TACC3_HUMAN	sp|Q9Y6A5|TACC3_HUMAN	TACC3_768	TACC3_774	YQALKAHAEEK	AHAEEKLQLANEEIAQVR	TACC3_768-TACC3_774	768	774
1198-1-11-1-21-1	L1_20190826_HS_1023_FU_CL1_4.mgf	7793	4	2578.28	1	TKENEELTR	2	818	>sp|Q9Y6A5|TACC3_HUMAN Transforming acidic coiled-coil-containing protein 3 OS=Homo sapiens GN=TACC3 PE=1 SV=1	1118.56	2.12e-07	4.8e-15	IQSLEKTVEQK	6	807	>sp|Q9Y6A5|TACC3_HUMAN Transforming acidic coiled-coil-containing protein 3 OS=Homo sapiens GN=TACC3 PE=1 SV=1	1301.72	4.98e-24	7.19e-36	>sp|Q9Y6A5|TACC3_HUMAN Transforming acidic coiled-coil-containing protein 3 OS=Homo sapiens GN=TACC3 PE=1 SV=1-812->sp|Q9Y6A5|TACC3_HUMAN Transforming acidic coiled-coil-containing protein 3 OS=Homo sapiens GN=TACC3 PE=1 SV=1-819	TACC3	TACC3	>sp|Q9Y6A5|TACC3_HUMAN Transforming acidic coiled-coil-containing protein 3 OS=Homo sapiens GN=TACC3 PE=1 SV=1	>sp|Q9Y6A5|TACC3_HUMAN Transforming acidic coiled-coil-containing protein 3 OS=Homo sapiens GN=TACC3 PE=1 SV=1	812	819	0	sp|Q9Y6A5|TACC3_HUMAN	sp|Q9Y6A5|TACC3_HUMAN	TACC3_812	TACC3_819	IQSLEKTVEQK	TKENEELTR	TACC3_812-TACC3_819	812	819
3110-1-1-1-3-1	L1_20190826_HS_1023_FU_CL1_7.mgf	12688	4	2445.26	1	SVHKVEPITK	4	61	>tr|A0A024RA52|A0A024RA52_HUMAN Proteasome subunit alpha type OS=Homo sapiens GN=PSMA2 PE=1 SV=1,>sp|P25787|PSA2_HUMAN Proteasome subunit alpha type-2 OS=Homo sapiens GN=PSMA2 PE=1 SV=2	1136.66	1.38e-06	1.2e-16	QKSILYDER	2	52	>tr|A0A024RA52|A0A024RA52_HUMAN Proteasome subunit alpha type OS=Homo sapiens GN=PSMA2 PE=1 SV=1,>sp|P25787|PSA2_HUMAN Proteasome subunit alpha type-2 OS=Homo sapiens GN=PSMA2 PE=1 SV=2	1150.6	1.07e-21	1.07e-21	>tr|A0A024RA52|A0A024RA52_HUMAN Proteasome subunit alpha type OS=Homo sapiens GN=PSMA2 PE=1 SV=1,>sp|P25787|PSA2_HUMAN Proteasome subunit alpha type-2 OS=Homo sapiens GN=PSMA2 PE=1 SV=2-53->tr|A0A024RA52|A0A024RA52_HUMAN Proteasome subunit alpha type OS=Homo sapiens GN=PSMA2 PE=1 SV=1,>sp|P25787|PSA2_HUMAN Proteasome subunit alpha type-2 OS=Homo sapiens GN=PSMA2 PE=1 SV=2-64	PSMA2	PSMA2	>tr|A0A024RA52|A0A024RA52_HUMAN Proteasome subunit alpha type OS=Homo sapiens GN=PSMA2 PE=1 SV=1	>tr|A0A024RA52|A0A024RA52_HUMAN Proteasome subunit alpha type OS=Homo sapiens GN=PSMA2 PE=1 SV=1	53	64	1	tr|A0A024RA52|A0A024RA52_HUMAN	tr|A0A024RA52|A0A024RA52_HUMAN	PSMA2_53	PSMA2_64	QKSILYDER	SVHKVEPITK	PSMA2_53-PSMA2_64	53	64
7569-2-1-1-12-1	L1_20190826_HS_1023_FU_CL1_7.mgf	26851	4	2668.36	3	TFLEKR	5	172	>tr|A0A024RA52|A0A024RA52_HUMAN Proteasome subunit alpha type OS=Homo sapiens GN=PSMA2 PE=1 SV=1,>sp|P25787|PSA2_HUMAN Proteasome subunit alpha type-2 OS=Homo sapiens GN=PSMA2 PE=1 SV=2,>tr|C9JCK5|C9JCK5_HUMAN Proteasome subunit alpha type-2 OS=Homo sapiens GN=PSMA2 PE=1 SV=1	792.449	3.86e-06	1.36e-12	NIHKLLDEVFFSEK	4	51	>tr|H0YMZ1|H0YMZ1_HUMAN Proteasome subunit alpha type (Fragment) OS=Homo sapiens GN=PSMA4 PE=1 SV=8,>tr|H0YL69|H0YL69_HUMAN Proteasome subunit alpha type (Fragment) OS=Homo sapiens GN=PSMA4 PE=1 SV=1,>sp|P25789|PSA4_HUMAN Proteasome subunit alpha type-4 OS=Homo sapiens GN=PSMA4 PE=1 SV=1,>tr|H0YMI6|H0YMI6_HUMAN Proteasome subunit alpha type (Fragment) OS=Homo sapiens GN=PSMA4 PE=1 SV=1,>tr|H0YMA1…	1717.9	8.3e-12	2.27e-24	>tr|A0A024RA52|A0A024RA52_HUMAN Proteasome subunit alpha type OS=Homo sapiens GN=PSMA2 PE=1 SV=1,>sp|P25787|PSA2_HUMAN Proteasome subunit alpha type-2 OS=Homo sapiens GN=PSMA2 PE=1 SV=2,>tr|C9JCK5|C9JCK5_HUMAN Proteasome subunit alpha type-2 OS=Homo sapiens GN=PSMA2 PE=1 SV=1-176->tr|H0YMZ1|H0YMZ1_HUMAN Proteasome subunit alpha type (Fragment) OS=Homo sapiens GN=PSMA4 PE=1 SV=8,>tr|H0YL69|H0YL69_…	PSMA2	PSMA4	>tr|A0A024RA52|A0A024RA52_HUMAN Proteasome subunit alpha type OS=Homo sapiens GN=PSMA2 PE=1 SV=1	>tr|H0YMZ1|H0YMZ1_HUMAN Proteasome subunit alpha type (Fragment) OS=Homo sapiens GN=PSMA4 PE=1 SV=8	176	54	1	tr|A0A024RA52|A0A024RA52_HUMAN	tr|H0YMZ1|H0YMZ1_HUMAN	PSMA2_176	PSMA4_54	TFLEKR	NIHKLLDEVFFSEK	PSMA2_176-PSMA4_54	176	54
6511-1-24-1-2-1	L1_20190826_HS_1023_FU_CL1_7.mgf	23382	5	2576.34	2	IVSGKVR	5	257	>tr|A0A0A0MS54|A0A0A0MS54_HUMAN cAMP-dependent protein kinase catalytic subunit beta OS=Homo sapiens GN=PRKACB PE=1 SV=1,>sp|P22694-4|KAPCB_HUMAN Isoform 4 of cAMP-dependent protein kinase catalytic subunit beta OS=Homo sapiens GN=PRKACB,>sp|P22694-3|KAPCB_HUMAN Isoform 3 of cAMP-dependent protein kinase catalytic subunit beta OS=Homo sapiens GN=PRKACB,>sp|P22694|KAPCB_HUMAN cAMP-dependent protei…	757.481	5.16e-08	1.7e-16	FPSHFSSDLKDLLR	10	264	>tr|A0A0A0MS54|A0A0A0MS54_HUMAN cAMP-dependent protein kinase catalytic subunit beta OS=Homo sapiens GN=PRKACB PE=1 SV=1,>sp|P22694-4|KAPCB_HUMAN Isoform 4 of cAMP-dependent protein kinase catalytic subunit beta OS=Homo sapiens GN=PRKACB,>sp|P22694-3|KAPCB_HUMAN Isoform 3 of cAMP-dependent protein kinase catalytic subunit beta OS=Homo sapiens GN=PRKACB,>sp|P22694|KAPCB_HUMAN cAMP-dependent protei…	1660.86	4.41e-16	3.03e-35	>tr|A0A0A0MS54|A0A0A0MS54_HUMAN cAMP-dependent protein kinase catalytic subunit beta OS=Homo sapiens GN=PRKACB PE=1 SV=1,>sp|P22694-4|KAPCB_HUMAN Isoform 4 of cAMP-dependent protein kinase catalytic subunit beta OS=Homo sapiens GN=PRKACB,>sp|P22694-3|KAPCB_HUMAN Isoform 3 of cAMP-dependent protein kinase catalytic subunit beta OS=Homo sapiens GN=PRKACB,>sp|P22694|KAPCB_HUMAN cAMP-dependent protei…	PRKACB	PRKACB	>tr|A0A0A0MS54|A0A0A0MS54_HUMAN cAMP-dependent protein kinase catalytic subunit beta OS=Homo sapiens GN=PRKACB PE=1 SV=1	>tr|A0A0A0MS54|A0A0A0MS54_HUMAN cAMP-dependent protein kinase catalytic subunit beta OS=Homo sapiens GN=PRKACB PE=1 SV=1	261	273	1	tr|A0A0A0MS54|A0A0A0MS54_HUMAN	tr|A0A0A0MS54|A0A0A0MS54_HUMAN	PRKACB_261	PRKACB_273	IVSGKVR	FPSHFSSDLKDLLR	PRKACB_261-PRKACB_273	261	273
4097-1-2-1-1-1	L1_20190826_HS_1023_FU_CL1_5.mgf	16217	4	2114.19	4	IVSGKVR	5	257	>tr|A0A0A0MS54|A0A0A0MS54_HUMAN cAMP-dependent protein kinase catalytic subunit beta OS=Homo sapiens GN=PRKACB PE=1 SV=1,>sp|P22694-4|KAPCB_HUMAN Isoform 4 of cAMP-dependent protein kinase catalytic subunit beta OS=Homo sapiens GN=PRKACB,>sp|P22694-3|KAPCB_HUMAN Isoform 3 of cAMP-dependent protein kinase catalytic subunit beta OS=Homo sapiens GN=PRKACB,>sp|P22694|KAPCB_HUMAN cAMP-dependent protei…	757.481	2.86e-05	4.51e-12	NLLQVDLTKR	9	278	>tr|A0A0A0MS54|A0A0A0MS54_HUMAN cAMP-dependent protein kinase catalytic subunit beta OS=Homo sapiens GN=PRKACB PE=1 SV=1,>sp|P22694-4|KAPCB_HUMAN Isoform 4 of cAMP-dependent protein kinase catalytic subunit beta OS=Homo sapiens GN=PRKACB,>sp|P22694-3|KAPCB_HUMAN Isoform 3 of cAMP-dependent protein kinase catalytic subunit beta OS=Homo sapiens GN=PRKACB,>sp|P22694|KAPCB_HUMAN cAMP-dependent protei…	1198.7	1.56e-20	1.33e-29	>tr|A0A0A0MS54|A0A0A0MS54_HUMAN cAMP-dependent protein kinase catalytic subunit beta OS=Homo sapiens GN=PRKACB PE=1 SV=1,>sp|P22694-4|KAPCB_HUMAN Isoform 4 of cAMP-dependent protein kinase catalytic subunit beta OS=Homo sapiens GN=PRKACB,>sp|P22694-3|KAPCB_HUMAN Isoform 3 of cAMP-dependent protein kinase catalytic subunit beta OS=Homo sapiens GN=PRKACB,>sp|P22694|KAPCB_HUMAN cAMP-dependent protei…	PRKACB	PRKACB	>tr|A0A0A0MS54|A0A0A0MS54_HUMAN cAMP-dependent protein kinase catalytic subunit beta OS=Homo sapiens GN=PRKACB PE=1 SV=1	>tr|A0A0A0MS54|A0A0A0MS54_HUMAN cAMP-dependent protein kinase catalytic subunit beta OS=Homo sapiens GN=PRKACB PE=1 SV=1	261	286	1	tr|A0A0A0MS54|A0A0A0MS54_HUMAN	tr|A0A0A0MS54|A0A0A0MS54_HUMAN	PRKACB_261	PRKACB_286	IVSGKVR	NLLQVDLTKR	PRKACB_261-PRKACB_286	261	286
3201-1-138-1-4-1	L1_20190826_HS_1023_FU_CL1_4.mgf	15325	4	2799.49	1	ITITNDKGR	7	502	>tr|A0A0G2JIW1|A0A0G2JIW1_HUMAN Heat shock 70 kDa protein 1B OS=Homo sapiens GN=HSPA1B PE=1 SV=1,>sp|P0DMV9|HS71B_HUMAN Heat shock 70 kDa protein 1B OS=Homo sapiens GN=HSPA1B PE=1 SV=1,>sp|P0DMV8|HS71A_HUMAN Heat shock 70 kDa protein 1A OS=Homo sapiens GN=HSPA1A PE=1 SV=1,>sp|P0DMV8-2|HS71A_HUMAN Isoform 2 of Heat shock 70 kDa protein 1A OS=Homo sapiens GN=HSPA1A,>sp|P11142|HSP7C_HUMAN Heat shock…	1016.56	1	2e-13	QATKDAGVIAGLNVLR	4	157	>tr|A0A0G2JIW1|A0A0G2JIW1_HUMAN Heat shock 70 kDa protein 1B OS=Homo sapiens GN=HSPA1B PE=1 SV=1,>sp|P0DMV9|HS71B_HUMAN Heat shock 70 kDa protein 1B OS=Homo sapiens GN=HSPA1B PE=1 SV=1,>sp|P0DMV8|HS71A_HUMAN Heat shock 70 kDa protein 1A OS=Homo sapiens GN=HSPA1A PE=1 SV=1,>sp|P0DMV8-2|HS71A_HUMAN Isoform 2 of Heat shock 70 kDa protein 1A OS=Homo sapiens GN=HSPA1A	1624.93	1.42e-17	3.67e-25	>tr|A0A0G2JIW1|A0A0G2JIW1_HUMAN Heat shock 70 kDa protein 1B OS=Homo sapiens GN=HSPA1B PE=1 SV=1,>sp|P0DMV9|HS71B_HUMAN Heat shock 70 kDa protein 1B OS=Homo sapiens GN=HSPA1B PE=1 SV=1,>sp|P0DMV8|HS71A_HUMAN Heat shock 70 kDa protein 1A OS=Homo sapiens GN=HSPA1A PE=1 SV=1,>sp|P0DMV8-2|HS71A_HUMAN Isoform 2 of Heat shock 70 kDa protein 1A OS=Homo sapiens GN=HSPA1A-160->tr|A0A0G2JIW1|A0A0G2JIW1_HUM…	HSPA1B	HSPA1B	>tr|A0A0G2JIW1|A0A0G2JIW1_HUMAN Heat shock 70 kDa protein 1B OS=Homo sapiens GN=HSPA1B PE=1 SV=1	>tr|A0A0G2JIW1|A0A0G2JIW1_HUMAN Heat shock 70 kDa protein 1B OS=Homo sapiens GN=HSPA1B PE=1 SV=1	160	508	1	tr|A0A0G2JIW1|A0A0G2JIW1_HUMAN	tr|A0A0G2JIW1|A0A0G2JIW1_HUMAN	HSPA1B_160	HSPA1B_508	QATKDAGVIAGLNVLR	ITITNDKGR	HSPA1B_160-HSPA1B_508	160	508
5119-1-4-1-2-1	L1_20190826_HS_1023_FU_CL1_7.mgf	18927	4	2612.36	2	LNLLKR	5	11	>tr|A0A0U1RRM1|A0A0U1RRM1_HUMAN Transcriptional repressor p66-beta OS=Homo sapiens GN=GATAD2B PE=1 SV=1,>sp|Q8WXI9|P66B_HUMAN Transcriptional repressor p66-beta OS=Homo sapiens GN=GATAD2B PE=1 SV=1	755.502	0.000419557	1.65e-11	SLDPADERDDVLAKR	14	17	>tr|A0A0U1RRM1|A0A0U1RRM1_HUMAN Transcriptional repressor p66-beta OS=Homo sapiens GN=GATAD2B PE=1 SV=1,>sp|Q8WXI9|P66B_HUMAN Transcriptional repressor p66-beta OS=Homo sapiens GN=GATAD2B PE=1 SV=1	1698.85	3.14e-26	1.8e-34	>tr|A0A0U1RRM1|A0A0U1RRM1_HUMAN Transcriptional repressor p66-beta OS=Homo sapiens GN=GATAD2B PE=1 SV=1,>sp|Q8WXI9|P66B_HUMAN Transcriptional repressor p66-beta OS=Homo sapiens GN=GATAD2B PE=1 SV=1-15->tr|A0A0U1RRM1|A0A0U1RRM1_HUMAN Transcriptional repressor p66-beta OS=Homo sapiens GN=GATAD2B PE=1 SV=1,>sp|Q8WXI9|P66B_HUMAN Transcriptional repressor p66-beta OS=Homo sapiens GN=GATAD2B PE=1 SV=1-…	GATAD2B	GATAD2B	>tr|A0A0U1RRM1|A0A0U1RRM1_HUMAN Transcriptional repressor p66-beta OS=Homo sapiens GN=GATAD2B PE=1 SV=1	>tr|A0A0U1RRM1|A0A0U1RRM1_HUMAN Transcriptional repressor p66-beta OS=Homo sapiens GN=GATAD2B PE=1 SV=1	15	30	1	tr|A0A0U1RRM1|A0A0U1RRM1_HUMAN	tr|A0A0U1RRM1|A0A0U1RRM1_HUMAN	GATAD2B_15	GATAD2B_30	LNLLKR	SLDPADERDDVLAKR	GATAD2B_15-GATAD2B_30	15	30
3120-1-4-1-1-2	L1_20190826_HS_1023_FU_CL1_7.mgf	12718	5	2259.12	1	LNLLKR	5	11	>tr|A0A0U1RRM1|A0A0U1RRM1_HUMAN Transcriptional repressor p66-beta OS=Homo sapiens GN=GATAD2B PE=1 SV=1,>sp|Q8WXI9|P66B_HUMAN Transcriptional repressor p66-beta OS=Homo sapiens GN=GATAD2B PE=1 SV=1	755.502	7.56e-06	4.47e-13	LKMEGHEAMoER	2	32	>tr|A0A0U1RRM1|A0A0U1RRM1_HUMAN Transcriptional repressor p66-beta OS=Homo sapiens GN=GATAD2B PE=1 SV=1,>sp|Q8WXI9|P66B_HUMAN Transcriptional repressor p66-beta OS=Homo sapiens GN=GATAD2B PE=1 SV=1	1345.61	0.0118933	3.47e-17	>tr|A0A0U1RRM1|A0A0U1RRM1_HUMAN Transcriptional repressor p66-beta OS=Homo sapiens GN=GATAD2B PE=1 SV=1,>sp|Q8WXI9|P66B_HUMAN Transcriptional repressor p66-beta OS=Homo sapiens GN=GATAD2B PE=1 SV=1-15->tr|A0A0U1RRM1|A0A0U1RRM1_HUMAN Transcriptional repressor p66-beta OS=Homo sapiens GN=GATAD2B PE=1 SV=1,>sp|Q8WXI9|P66B_HUMAN Transcriptional repressor p66-beta OS=Homo sapiens GN=GATAD2B PE=1 SV=1-…	GATAD2B	GATAD2B	>tr|A0A0U1RRM1|A0A0U1RRM1_HUMAN Transcriptional repressor p66-beta OS=Homo sapiens GN=GATAD2B PE=1 SV=1	>tr|A0A0U1RRM1|A0A0U1RRM1_HUMAN Transcriptional repressor p66-beta OS=Homo sapiens GN=GATAD2B PE=1 SV=1	0	15	1	tr|A0A0U1RRM1|A0A0U1RRM1_HUMAN	tr|A0A0U1RRM1|A0A0U1RRM1_HUMAN	GATAD2B_0	GATAD2B_15	LKMEGHEAMoER	LNLLKR	GATAD2B_0-GATAD2B_15	0	15
3127-1-1-2-2-1	L1_20190826_HS_1023_FU_CL1_7.mgf	12739	5	3202.47	1	LKMEGHEAMoER	2	32	>tr|A0A0U1RRM1|A0A0U1RRM1_HUMAN Transcriptional repressor p66-beta OS=Homo sapiens GN=GATAD2B PE=1 SV=1,>sp|Q8WXI9|P66B_HUMAN Transcriptional repressor p66-beta OS=Homo sapiens GN=GATAD2B PE=1 SV=1	1345.61	0.120153	1.51e-15	SLDPADERDDVLAKR	14	17	>tr|A0A0U1RRM1|A0A0U1RRM1_HUMAN Transcriptional repressor p66-beta OS=Homo sapiens GN=GATAD2B PE=1 SV=1,>sp|Q8WXI9|P66B_HUMAN Transcriptional repressor p66-beta OS=Homo sapiens GN=GATAD2B PE=1 SV=1	1698.85	1.42e-21	1.42e-21	>tr|A0A0U1RRM1|A0A0U1RRM1_HUMAN Transcriptional repressor p66-beta OS=Homo sapiens GN=GATAD2B PE=1 SV=1,>sp|Q8WXI9|P66B_HUMAN Transcriptional repressor p66-beta OS=Homo sapiens GN=GATAD2B PE=1 SV=1-30->tr|A0A0U1RRM1|A0A0U1RRM1_HUMAN Transcriptional repressor p66-beta OS=Homo sapiens GN=GATAD2B PE=1 SV=1,>sp|Q8WXI9|P66B_HUMAN Transcriptional repressor p66-beta OS=Homo sapiens GN=GATAD2B PE=1 SV=1-…	GATAD2B	GATAD2B	>tr|A0A0U1RRM1|A0A0U1RRM1_HUMAN Transcriptional repressor p66-beta OS=Homo sapiens GN=GATAD2B PE=1 SV=1	>tr|A0A0U1RRM1|A0A0U1RRM1_HUMAN Transcriptional repressor p66-beta OS=Homo sapiens GN=GATAD2B PE=1 SV=1	0	30	1	tr|A0A0U1RRM1|A0A0U1RRM1_HUMAN	tr|A0A0U1RRM1|A0A0U1RRM1_HUMAN	GATAD2B_0	GATAD2B_30	LKMEGHEAMoER	SLDPADERDDVLAKR	GATAD2B_0-GATAD2B_30	0	30
5579-1-3-1-8-1	L1_20190826_HS_1023_FU_CL1_6.mgf	20819	4	2720.46	1	MoLALLKR	6	45	>tr|A0A0U1RRM1|A0A0U1RRM1_HUMAN Transcriptional repressor p66-beta OS=Homo sapiens GN=GATAD2B PE=1 SV=1,>sp|Q8WXI9|P66B_HUMAN Transcriptional repressor p66-beta OS=Homo sapiens GN=GATAD2B PE=1 SV=1	859.531	6.19e-10	3.01e-17	KDLANLEVPHELPTK	1	52	>tr|A0A0U1RRM1|A0A0U1RRM1_HUMAN Transcriptional repressor p66-beta OS=Homo sapiens GN=GATAD2B PE=1 SV=1,>sp|Q8WXI9|P66B_HUMAN Transcriptional repressor p66-beta OS=Homo sapiens GN=GATAD2B PE=1 SV=1	1702.93	6.08e-14	3.9e-28	>tr|A0A0U1RRM1|A0A0U1RRM1_HUMAN Transcriptional repressor p66-beta OS=Homo sapiens GN=GATAD2B PE=1 SV=1,>sp|Q8WXI9|P66B_HUMAN Transcriptional repressor p66-beta OS=Homo sapiens GN=GATAD2B PE=1 SV=1-50->tr|A0A0U1RRM1|A0A0U1RRM1_HUMAN Transcriptional repressor p66-beta OS=Homo sapiens GN=GATAD2B PE=1 SV=1,>sp|Q8WXI9|P66B_HUMAN Transcriptional repressor p66-beta OS=Homo sapiens GN=GATAD2B PE=1 SV=1-…	GATAD2B	GATAD2B	>tr|A0A0U1RRM1|A0A0U1RRM1_HUMAN Transcriptional repressor p66-beta OS=Homo sapiens GN=GATAD2B PE=1 SV=1	>tr|A0A0U1RRM1|A0A0U1RRM1_HUMAN Transcriptional repressor p66-beta OS=Homo sapiens GN=GATAD2B PE=1 SV=1	4	52	1	tr|A0A0U1RRM1|A0A0U1RRM1_HUMAN	tr|A0A0U1RRM1|A0A0U1RRM1_HUMAN	GATAD2B_4	GATAD2B_52	MoLALLKR	KDLANLEVPHELPTK	GATAD2B_4-GATAD2B_52	4	52
3610-1-7-1-1-1	L1_20190826_HS_1023_FU_CL1_5.mgf	14710	4	3487.68	1	EVKASEKPVSPK	3	62	>tr|B1ALK7|B1ALK7_HUMAN Rho guanine nucleotide exchange factor 7 OS=Homo sapiens GN=ARHGEF7 PE=1 SV=1,>sp|Q14155-1|ARHG7_HUMAN Isoform 1 of Rho guanine nucleotide exchange factor 7 OS=Homo sapiens GN=ARHGEF7,>sp|Q14155-5|ARHG7_HUMAN Isoform 5 of Rho guanine nucleotide exchange factor 7 OS=Homo sapiens GN=ARHGEF7,>sp|Q14155-6|ARHG7_HUMAN Isoform 6 of Rho guanine nucleotide exchange factor 7 OS=Hom…	1297.72	0.00380673	9.56e-12	AKFNFQQTNEDELSFSK	2	13	>tr|B1ALK7|B1ALK7_HUMAN Rho guanine nucleotide exchange factor 7 OS=Homo sapiens GN=ARHGEF7 PE=1 SV=1,>sp|Q14155-1|ARHG7_HUMAN Isoform 1 of Rho guanine nucleotide exchange factor 7 OS=Homo sapiens GN=ARHGEF7,>sp|Q14155-5|ARHG7_HUMAN Isoform 5 of Rho guanine nucleotide exchange factor 7 OS=Homo sapiens GN=ARHGEF7,>sp|Q14155-6|ARHG7_HUMAN Isoform 6 of Rho guanine nucleotide exchange factor 7 OS=Hom…	2031.95	5.11e-33	2.8e-50	>tr|B1ALK7|B1ALK7_HUMAN Rho guanine nucleotide exchange factor 7 OS=Homo sapiens GN=ARHGEF7 PE=1 SV=1,>sp|Q14155-1|ARHG7_HUMAN Isoform 1 of Rho guanine nucleotide exchange factor 7 OS=Homo sapiens GN=ARHGEF7,>sp|Q14155-5|ARHG7_HUMAN Isoform 5 of Rho guanine nucleotide exchange factor 7 OS=Homo sapiens GN=ARHGEF7,>sp|Q14155-6|ARHG7_HUMAN Isoform 6 of Rho guanine nucleotide exchange factor 7 OS=Hom…	ARHGEF7	ARHGEF7	>tr|B1ALK7|B1ALK7_HUMAN Rho guanine nucleotide exchange factor 7 OS=Homo sapiens GN=ARHGEF7 PE=1 SV=1	>tr|B1ALK7|B1ALK7_HUMAN Rho guanine nucleotide exchange factor 7 OS=Homo sapiens GN=ARHGEF7 PE=1 SV=1	14	64	1	tr|B1ALK7|B1ALK7_HUMAN	tr|B1ALK7|B1ALK7_HUMAN	ARHGEF7_14	ARHGEF7_64	AKFNFQQTNEDELSFSK	EVKASEKPVSPK	ARHGEF7_14-ARHGEF7_64	14	64
1777-1-2-1-7-1	L1_20190826_HS_1023_FU_CL1_4.mgf	10502	4	2161.17	1	SGTLKSPPK	5	74	>tr|B1ALK7|B1ALK7_HUMAN Rho guanine nucleotide exchange factor 7 OS=Homo sapiens GN=ARHGEF7 PE=1 SV=1,>sp|Q14155-1|ARHG7_HUMAN Isoform 1 of Rho guanine nucleotide exchange factor 7 OS=Homo sapiens GN=ARHGEF7,>sp|Q14155-5|ARHG7_HUMAN Isoform 5 of Rho guanine nucleotide exchange factor 7 OS=Homo sapiens GN=ARHGEF7,>sp|Q14155-6|ARHG7_HUMAN Isoform 6 of Rho guanine nucleotide exchange factor 7 OS=Hom…	913.523	6.11e-11	6.89e-21	LDKYPTLLK	3	232	>tr|B1ALK7|B1ALK7_HUMAN Rho guanine nucleotide exchange factor 7 OS=Homo sapiens GN=ARHGEF7 PE=1 SV=1,>sp|Q14155-1|ARHG7_HUMAN Isoform 1 of Rho guanine nucleotide exchange factor 7 OS=Homo sapiens GN=ARHGEF7,>sp|Q14155-5|ARHG7_HUMAN Isoform 5 of Rho guanine nucleotide exchange factor 7 OS=Homo sapiens GN=ARHGEF7,>sp|Q14155-6|ARHG7_HUMAN Isoform 6 of Rho guanine nucleotide exchange factor 7 OS=Hom…	1089.64	6.72e-09	5.08e-16	>tr|B1ALK7|B1ALK7_HUMAN Rho guanine nucleotide exchange factor 7 OS=Homo sapiens GN=ARHGEF7 PE=1 SV=1,>sp|Q14155-1|ARHG7_HUMAN Isoform 1 of Rho guanine nucleotide exchange factor 7 OS=Homo sapiens GN=ARHGEF7,>sp|Q14155-5|ARHG7_HUMAN Isoform 5 of Rho guanine nucleotide exchange factor 7 OS=Homo sapiens GN=ARHGEF7,>sp|Q14155-6|ARHG7_HUMAN Isoform 6 of Rho guanine nucleotide exchange factor 7 OS=Hom…	ARHGEF7	ARHGEF7	>tr|B1ALK7|B1ALK7_HUMAN Rho guanine nucleotide exchange factor 7 OS=Homo sapiens GN=ARHGEF7 PE=1 SV=1	>tr|B1ALK7|B1ALK7_HUMAN Rho guanine nucleotide exchange factor 7 OS=Homo sapiens GN=ARHGEF7 PE=1 SV=1	234	78	1	tr|B1ALK7|B1ALK7_HUMAN	tr|B1ALK7|B1ALK7_HUMAN	ARHGEF7_234	ARHGEF7_78	LDKYPTLLK	SGTLKSPPK	ARHGEF7_234-ARHGEF7_78	234	78
2674-1-3-1-6-1	L1_20190826_HS_1023_FU_CL1_3.mgf	15327	4	4436	1	YGGLKMPTR	5	427	>tr|E7ESY4|E7ESY4_HUMAN Metastasis-associated protein MTA1 OS=Homo sapiens GN=MTA1 PE=1 SV=1,>sp|Q13330-3|MTA1_HUMAN Isoform 3 of Metastasis-associated protein MTA1 OS=Homo sapiens GN=MTA1,>sp|Q13330|MTA1_HUMAN Metastasis-associated protein MTA1 OS=Homo sapiens GN=MTA1 PE=1 SV=2,>tr|H0Y4T7|H0Y4T7_HUMAN Metastasis-associated protein MTA1 (Fragment) OS=Homo sapiens GN=MTA1 PE=1 SV=1	1021.54	1	1.4e-11	AGPGADNGEEGEIEEEMENPEMVDLPEKLK	28	71	>tr|E7ESY4|E7ESY4_HUMAN Metastasis-associated protein MTA1 OS=Homo sapiens GN=MTA1 PE=1 SV=1,>sp|Q13330|MTA1_HUMAN Metastasis-associated protein MTA1 OS=Homo sapiens GN=MTA1 PE=1 SV=2,>sp|Q13330-2|MTA1_HUMAN Isoform Short of Metastasis-associated protein MTA1 OS=Homo sapiens GN=MTA1	3255.44	1.39e-25	4.15e-33	>tr|E7ESY4|E7ESY4_HUMAN Metastasis-associated protein MTA1 OS=Homo sapiens GN=MTA1 PE=1 SV=1,>sp|Q13330-3|MTA1_HUMAN Isoform 3 of Metastasis-associated protein MTA1 OS=Homo sapiens GN=MTA1,>sp|Q13330|MTA1_HUMAN Metastasis-associated protein MTA1 OS=Homo sapiens GN=MTA1 PE=1 SV=2,>tr|H0Y4T7|H0Y4T7_HUMAN Metastasis-associated protein MTA1 (Fragment) OS=Homo sapiens GN=MTA1 PE=1 SV=1-431->tr|E7ESY4|…	MTA1	MTA1	>sp|Q13330-3|MTA1_HUMAN Isoform 3 of Metastasis-associated protein MTA1 OS=Homo sapiens GN=MTA1	>tr|E7ESY4|E7ESY4_HUMAN Metastasis-associated protein MTA1 OS=Homo sapiens GN=MTA1 PE=1 SV=1	414	98	1	sp|Q13330-3|MTA1_HUMAN	tr|E7ESY4|E7ESY4_HUMAN	MTA1_414	MTA1_98	YGGLKMPTR	AGPGADNGEEGEIEEEMENPEMVDLPEKLK	MTA1_414-MTA1_98	414	98
6127-1-1-1-2-1	L1_20190826_HS_1023_FU_CL1_6.mgf	22778	5	4777.23	1	LLLLQKMoLK	6	1045	>tr|F5GWX5|F5GWX5_HUMAN Chromodomain-helicase-DNA-binding protein 4 OS=Homo sapiens GN=CHD4 PE=1 SV=1,>tr|A0A0C4DGG9|A0A0C4DGG9_HUMAN Chromodomain-helicase-DNA-binding protein 4 OS=Homo sapiens GN=CHD4 PE=1 SV=1,>sp|Q14839|CHD4_HUMAN Chromodomain-helicase-DNA-binding protein 4 OS=Homo sapiens GN=CHD4 PE=1 SV=2,>sp|Q14839-2|CHD4_HUMAN Isoform 2 of Chromodomain-helicase-DNA-binding protein 4 OS=Hom…	1114.71	5.25e-08	5.44e-21	FGTEELFKDEATDGGGDNKEGEDSSVIHYDDK	19	1214	>tr|F5GWX5|F5GWX5_HUMAN Chromodomain-helicase-DNA-binding protein 4 OS=Homo sapiens GN=CHD4 PE=1 SV=1,>tr|A0A0C4DGG9|A0A0C4DGG9_HUMAN Chromodomain-helicase-DNA-binding protein 4 OS=Homo sapiens GN=CHD4 PE=1 SV=1,>sp|Q14839|CHD4_HUMAN Chromodomain-helicase-DNA-binding protein 4 OS=Homo sapiens GN=CHD4 PE=1 SV=2,>sp|Q14839-2|CHD4_HUMAN Isoform 2 of Chromodomain-helicase-DNA-binding protein 4 OS=Hom…	3503.51	1.13e-17	9.46e-37	>tr|F5GWX5|F5GWX5_HUMAN Chromodomain-helicase-DNA-binding protein 4 OS=Homo sapiens GN=CHD4 PE=1 SV=1,>tr|A0A0C4DGG9|A0A0C4DGG9_HUMAN Chromodomain-helicase-DNA-binding protein 4 OS=Homo sapiens GN=CHD4 PE=1 SV=1,>sp|Q14839|CHD4_HUMAN Chromodomain-helicase-DNA-binding protein 4 OS=Homo sapiens GN=CHD4 PE=1 SV=2,>sp|Q14839-2|CHD4_HUMAN Isoform 2 of Chromodomain-helicase-DNA-binding protein 4 OS=Hom…	CHD4	CHD4	>tr|F5GWX5|F5GWX5_HUMAN Chromodomain-helicase-DNA-binding protein 4 OS=Homo sapiens GN=CHD4 PE=1 SV=1	>tr|F5GWX5|F5GWX5_HUMAN Chromodomain-helicase-DNA-binding protein 4 OS=Homo sapiens GN=CHD4 PE=1 SV=1	1232	4	1	tr|F5GWX5|F5GWX5_HUMAN	tr|F5GWX5|F5GWX5_HUMAN	CHD4_1232	CHD4_4	FGTEELFKDEATDGGGDNKEGEDSSVIHYDDK	LLLLQKMoLK	CHD4_1232-CHD4_4	1232	4
7871-1-3-1-3-1	L1_20190826_HS_1023_FU_CL1_8.mgf	27887	5	3382.56	1	NLKEGGHR	3	1054	>tr|F5GWX5|F5GWX5_HUMAN Chromodomain-helicase-DNA-binding protein 4 OS=Homo sapiens GN=CHD4 PE=1 SV=1,>tr|A0A0C4DGG9|A0A0C4DGG9_HUMAN Chromodomain-helicase-DNA-binding protein 4 OS=Homo sapiens GN=CHD4 PE=1 SV=1,>sp|Q14839|CHD4_HUMAN Chromodomain-helicase-DNA-binding protein 4 OS=Homo sapiens GN=CHD4 PE=1 SV=2,>sp|Q14839-2|CHD4_HUMAN Isoform 2 of Chromodomain-helicase-DNA-binding protein 4 OS=Hom…	909.478	8.32e-06	5.4e-12	MoLDLLEDFLEHEGYKYER	15	1071	>tr|F5GWX5|F5GWX5_HUMAN Chromodomain-helicase-DNA-binding protein 4 OS=Homo sapiens GN=CHD4 PE=1 SV=1,>tr|A0A0C4DGG9|A0A0C4DGG9_HUMAN Chromodomain-helicase-DNA-binding protein 4 OS=Homo sapiens GN=CHD4 PE=1 SV=1,>sp|Q14839|CHD4_HUMAN Chromodomain-helicase-DNA-binding protein 4 OS=Homo sapiens GN=CHD4 PE=1 SV=2,>sp|Q14839-2|CHD4_HUMAN Isoform 2 of Chromodomain-helicase-DNA-binding protein 4 OS=Hom…	2315.08	4.56e-13	3.35e-32	>tr|F5GWX5|F5GWX5_HUMAN Chromodomain-helicase-DNA-binding protein 4 OS=Homo sapiens GN=CHD4 PE=1 SV=1,>tr|A0A0C4DGG9|A0A0C4DGG9_HUMAN Chromodomain-helicase-DNA-binding protein 4 OS=Homo sapiens GN=CHD4 PE=1 SV=1,>sp|Q14839|CHD4_HUMAN Chromodomain-helicase-DNA-binding protein 4 OS=Homo sapiens GN=CHD4 PE=1 SV=2,>sp|Q14839-2|CHD4_HUMAN Isoform 2 of Chromodomain-helicase-DNA-binding protein 4 OS=Hom…	CHD4	CHD4	>tr|F5GWX5|F5GWX5_HUMAN Chromodomain-helicase-DNA-binding protein 4 OS=Homo sapiens GN=CHD4 PE=1 SV=1	>tr|F5GWX5|F5GWX5_HUMAN Chromodomain-helicase-DNA-binding protein 4 OS=Homo sapiens GN=CHD4 PE=1 SV=1	1056	13	1	tr|F5GWX5|F5GWX5_HUMAN	tr|F5GWX5|F5GWX5_HUMAN	CHD4_1056	CHD4_13	NLKEGGHR	MoLDLLEDFLEHEGYKYER	CHD4_1056-CHD4_13	1056	13
2409-1-3-1-1-1	L1_20190826_HS_1023_FU_CL1_4.mgf	12815	4	3166.44	1	VQKILIWK	3	495	>tr|F5GWX5|F5GWX5_HUMAN Chromodomain-helicase-DNA-binding protein 4 OS=Homo sapiens GN=CHD4 PE=1 SV=1,>tr|A0A0C4DGG9|A0A0C4DGG9_HUMAN Chromodomain-helicase-DNA-binding protein 4 OS=Homo sapiens GN=CHD4 PE=1 SV=1,>sp|Q14839|CHD4_HUMAN Chromodomain-helicase-DNA-binding protein 4 OS=Homo sapiens GN=CHD4 PE=1 SV=2,>sp|Q14839-2|CHD4_HUMAN Isoform 2 of Chromodomain-helicase-DNA-binding protein 4 OS=Hom…	1026.66	0.000863352	1.23e-13	KNDMoDEPPSGDFGGDEEK	1	570	>tr|F5GWX5|F5GWX5_HUMAN Chromodomain-helicase-DNA-binding protein 4 OS=Homo sapiens GN=CHD4 PE=1 SV=1,>tr|A0A0C4DGG9|A0A0C4DGG9_HUMAN Chromodomain-helicase-DNA-binding protein 4 OS=Homo sapiens GN=CHD4 PE=1 SV=1,>sp|Q14839|CHD4_HUMAN Chromodomain-helicase-DNA-binding protein 4 OS=Homo sapiens GN=CHD4 PE=1 SV=2,>sp|Q14839-2|CHD4_HUMAN Isoform 2 of Chromodomain-helicase-DNA-binding protein 4 OS=Hom…	1981.78	1.17e-29	1.31e-39	>tr|F5GWX5|F5GWX5_HUMAN Chromodomain-helicase-DNA-binding protein 4 OS=Homo sapiens GN=CHD4 PE=1 SV=1,>tr|A0A0C4DGG9|A0A0C4DGG9_HUMAN Chromodomain-helicase-DNA-binding protein 4 OS=Homo sapiens GN=CHD4 PE=1 SV=1,>sp|Q14839|CHD4_HUMAN Chromodomain-helicase-DNA-binding protein 4 OS=Homo sapiens GN=CHD4 PE=1 SV=2,>sp|Q14839-2|CHD4_HUMAN Isoform 2 of Chromodomain-helicase-DNA-binding protein 4 OS=Hom…	CHD4	CHD4	>tr|F5GWX5|F5GWX5_HUMAN Chromodomain-helicase-DNA-binding protein 4 OS=Homo sapiens GN=CHD4 PE=1 SV=1	>tr|F5GWX5|F5GWX5_HUMAN Chromodomain-helicase-DNA-binding protein 4 OS=Homo sapiens GN=CHD4 PE=1 SV=1	-1	497	1	tr|F5GWX5|F5GWX5_HUMAN	tr|F5GWX5|F5GWX5_HUMAN	CHD4_	1	KNDMoDEPPSGDFGGDEEK	VQKILIWK	CHD4_-1-CHD4_497	-1	497
2297-2-1-1-11-1	L1_20190826_HS_1023_FU_CL1_3.mgf	14135	4	2870.55	1	VQEVPKLK	6	40	>tr|F8VUA6|F8VUA6_HUMAN 60S ribosomal protein L18 (Fragment) OS=Homo sapiens GN=RPL18 PE=1 SV=1,>tr|G3V203|G3V203_HUMAN 60S ribosomal protein L18 OS=Homo sapiens GN=RPL18 PE=1 SV=1,>tr|H0YHA7|H0YHA7_HUMAN 60S ribosomal protein L18 (Fragment) OS=Homo sapiens GN=RPL18 PE=1 SV=1,>tr|J3QQ67|J3QQ67_HUMAN 60S ribosomal protein L18 (Fragment) OS=Homo sapiens GN=RPL18 PE=1 SV=1,>sp|Q07020-2|RL18_HUMAN Is…	939.575	7.93e-10	1.79e-17	AGGKILTFDQLALDSPK	4	64	>tr|F8VUA6|F8VUA6_HUMAN 60S ribosomal protein L18 (Fragment) OS=Homo sapiens GN=RPL18 PE=1 SV=1,>tr|G3V203|G3V203_HUMAN 60S ribosomal protein L18 OS=Homo sapiens GN=RPL18 PE=1 SV=1,>tr|H0YHA7|H0YHA7_HUMAN 60S ribosomal protein L18 (Fragment) OS=Homo sapiens GN=RPL18 PE=1 SV=1,>tr|J3QQ67|J3QQ67_HUMAN 60S ribosomal protein L18 (Fragment) OS=Homo sapiens GN=RPL18 PE=1 SV=1,>sp|Q07020-2|RL18_HUMAN Is…	1772.97	2.79e-32	1.24e-48	>tr|F8VUA6|F8VUA6_HUMAN 60S ribosomal protein L18 (Fragment) OS=Homo sapiens GN=RPL18 PE=1 SV=1,>tr|G3V203|G3V203_HUMAN 60S ribosomal protein L18 OS=Homo sapiens GN=RPL18 PE=1 SV=1,>tr|H0YHA7|H0YHA7_HUMAN 60S ribosomal protein L18 (Fragment) OS=Homo sapiens GN=RPL18 PE=1 SV=1,>tr|J3QQ67|J3QQ67_HUMAN 60S ribosomal protein L18 (Fragment) OS=Homo sapiens GN=RPL18 PE=1 SV=1,>sp|Q07020-2|RL18_HUMAN Is…	RPL18	RPL18	>tr|F8VUA6|F8VUA6_HUMAN 60S ribosomal protein L18 (Fragment) OS=Homo sapiens GN=RPL18 PE=1 SV=1	>tr|F8VUA6|F8VUA6_HUMAN 60S ribosomal protein L18 (Fragment) OS=Homo sapiens GN=RPL18 PE=1 SV=1	45	67	1	tr|F8VUA6|F8VUA6_HUMAN	tr|F8VUA6|F8VUA6_HUMAN	RPL18_45	RPL18_67	VQEVPKLK	AGGKILTFDQLALDSPK	RPL18_45-RPL18_67	45	67
1938-1-2-1-5-1	L1_20190826_HS_1023_FU_CL1_7.mgf	8789	4	2626.27	1	TKDLGHNDK	2	245	>tr|H0YNT2|H0YNT2_HUMAN Transducin-like enhancer protein 3 OS=Homo sapiens GN=TLE3 PE=1 SV=1,>tr|H0YKN8|H0YKN8_HUMAN Transducin-like enhancer protein 3 OS=Homo sapiens GN=TLE3 PE=1 SV=1,>tr|H0YL70|H0YL70_HUMAN Transducin-like enhancer protein 3 OS=Homo sapiens GN=TLE3 PE=1 SV=1,>sp|Q04726|TLE3_HUMAN Transducin-like enhancer protein 3 OS=Homo sapiens GN=TLE3 PE=1 SV=2,>tr|A0A0D9SES8|A0A0D9SES8_HUM…	1026.51	7.75e-07	1.02e-15	SSTPGLKSNTPTPR	7	254	>tr|H0YNT2|H0YNT2_HUMAN Transducin-like enhancer protein 3 OS=Homo sapiens GN=TLE3 PE=1 SV=1,>tr|H0YKN8|H0YKN8_HUMAN Transducin-like enhancer protein 3 OS=Homo sapiens GN=TLE3 PE=1 SV=1,>tr|H0YL70|H0YL70_HUMAN Transducin-like enhancer protein 3 OS=Homo sapiens GN=TLE3 PE=1 SV=1,>sp|Q04726|TLE3_HUMAN Transducin-like enhancer protein 3 OS=Homo sapiens GN=TLE3 PE=1 SV=2,>tr|A0A0D9SES8|A0A0D9SES8_HUM…	1441.75	2.3e-23	9.55e-37	>tr|H0YNT2|H0YNT2_HUMAN Transducin-like enhancer protein 3 OS=Homo sapiens GN=TLE3 PE=1 SV=1,>tr|H0YKN8|H0YKN8_HUMAN Transducin-like enhancer protein 3 OS=Homo sapiens GN=TLE3 PE=1 SV=1,>tr|H0YL70|H0YL70_HUMAN Transducin-like enhancer protein 3 OS=Homo sapiens GN=TLE3 PE=1 SV=1,>sp|Q04726|TLE3_HUMAN Transducin-like enhancer protein 3 OS=Homo sapiens GN=TLE3 PE=1 SV=2,>tr|A0A0D9SES8|A0A0D9SES8_HUM…	TLE3	TLE3	>tr|H0YNT2|H0YNT2_HUMAN Transducin-like enhancer protein 3 OS=Homo sapiens GN=TLE3 PE=1 SV=1	>tr|H0YNT2|H0YNT2_HUMAN Transducin-like enhancer protein 3 OS=Homo sapiens GN=TLE3 PE=1 SV=1	246	260	1	tr|H0YNT2|H0YNT2_HUMAN	tr|H0YNT2|H0YNT2_HUMAN	TLE3_246	TLE3_260	TKDLGHNDK	SSTPGLKSNTPTPR	TLE3_246-TLE3_260	246	260

## Sheet: TR2
index	file_name	scan	charge	precursor_mass	spectra_num	peptide_a	xl_a	pep_pos_a	protein_a	mass_a	n_score_a	n_score_a_MS2_MS3	peptide_b	xl_b	pep_pos_b	protein_b	mass_b	n_score_b	n_score_b_MS2_MS3	protein_a_b	gene_a	gene_b	protein_a_cln	protein_b_cln	AbsPos1	AbsPos2	shared_seq	Protein1	Protein2	pro_site_a	pro_site_b	peptide_a_resort	peptide_b_resort	pro_site_ab	LinkPos1	LinkPos2
1731-2-6-1-9-1	L1_20190826_HS_1023_FU_CL2_5.mgf	8440	4	2076.06	2	KGSTAVGVR	1	28	>sp|O14818|PSA7_HUMAN Proteasome subunit alpha type-7 OS=Homo sapiens GN=PSMA7 PE=1 SV=1	873.503	3.56169e-19	3.56169e-19	SVAKLQDER	4	49	>sp|O14818|PSA7_HUMAN Proteasome subunit alpha type-7 OS=Homo sapiens GN=PSMA7 PE=1 SV=1,>sp|Q8TAA3-5|PSA7L_HUMAN Isoform 3 of Proteasome subunit alpha type-7-like OS=Homo sapiens GN=PSMA8,>sp|Q8TAA3|PSA7L_HUMAN Proteasome subunit alpha type-7-like OS=Homo sapiens GN=PSMA8 PE=2 SV=3	1044.56	3.56169e-19	1.33894e-27	>sp|O14818|PSA7_HUMAN Proteasome subunit alpha type-7 OS=Homo sapiens GN=PSMA7 PE=1 SV=1-28->sp|O14818|PSA7_HUMAN Proteasome subunit alpha type-7 OS=Homo sapiens GN=PSMA7 PE=1 SV=1,>sp|Q8TAA3-5|PSA7L_HUMAN Isoform 3 of Proteasome subunit alpha type-7-like OS=Homo sapiens GN=PSMA8,>sp|Q8TAA3|PSA7L_HUMAN Proteasome subunit alpha type-7-like OS=Homo sapiens GN=PSMA8 PE=2 SV=3-52	PSMA7	PSMA7	>sp|O14818|PSA7_HUMAN Proteasome subunit alpha type-7 OS=Homo sapiens GN=PSMA7 PE=1 SV=1	>sp|O14818|PSA7_HUMAN Proteasome subunit alpha type-7 OS=Homo sapiens GN=PSMA7 PE=1 SV=1	28	52	1	sp|O14818|PSA7_HUMAN	sp|O14818|PSA7_HUMAN	PSMA7_28	PSMA7_52	KGSTAVGVR	SVAKLQDER	PSMA7_28-PSMA7_52	28	52
2301-1-9-1-187-1	L1_20190826_HS_1023_FU_CL2_3.mgf	13912	4	3245.68	1	SVAKLQDER	4	49	>sp|O14818|PSA7_HUMAN Proteasome subunit alpha type-7 OS=Homo sapiens GN=PSMA7 PE=1 SV=1,>sp|Q8TAA3-5|PSA7L_HUMAN Isoform 3 of Proteasome subunit alpha type-7-like OS=Homo sapiens GN=PSMA8,>sp|Q8TAA3|PSA7L_HUMAN Proteasome subunit alpha type-7-like OS=Homo sapiens GN=PSMA8 PE=2 SV=3	1044.56	6.78872e-07	6.72938e-16	ALLEVVQSGGKNIELAVMoR	11	194	>sp|O14818|PSA7_HUMAN Proteasome subunit alpha type-7 OS=Homo sapiens GN=PSMA7 PE=1 SV=1,>sp|O14818-2|PSA7_HUMAN Isoform 2 of Proteasome subunit alpha type-7 OS=Homo sapiens GN=PSMA7	2042.12	2.63235e-17	4.15195e-32	>sp|O14818|PSA7_HUMAN Proteasome subunit alpha type-7 OS=Homo sapiens GN=PSMA7 PE=1 SV=1,>sp|O14818-2|PSA7_HUMAN Isoform 2 of Proteasome subunit alpha type-7 OS=Homo sapiens GN=PSMA7-204->sp|O14818|PSA7_HUMAN Proteasome subunit alpha type-7 OS=Homo sapiens GN=PSMA7 PE=1 SV=1,>sp|Q8TAA3-5|PSA7L_HUMAN Isoform 3 of Proteasome subunit alpha type-7-like OS=Homo sapiens GN=PSMA8,>sp|Q8TAA3|PSA7L_HUMAN …	PSMA7	PSMA7	>sp|O14818|PSA7_HUMAN Proteasome subunit alpha type-7 OS=Homo sapiens GN=PSMA7 PE=1 SV=1	>sp|O14818|PSA7_HUMAN Proteasome subunit alpha type-7 OS=Homo sapiens GN=PSMA7 PE=1 SV=1	52	9	1	sp|O14818|PSA7_HUMAN	sp|O14818|PSA7_HUMAN	PSMA7_52	PSMA7_9	SVAKLQDER	ALLEVVQSGGKNIELAVMoR	PSMA7_52-PSMA7_9	52	9
5324-1-9-1-27-1	L1_20190826_HS_1023_FU_CL2_5.mgf	20663	4	3779.88	1	SVAKLQDER	4	49	>sp|O14818|PSA7_HUMAN Proteasome subunit alpha type-7 OS=Homo sapiens GN=PSMA7 PE=1 SV=1,>sp|Q8TAA3-5|PSA7L_HUMAN Isoform 3 of Proteasome subunit alpha type-7-like OS=Homo sapiens GN=PSMA8,>sp|Q8TAA3|PSA7L_HUMAN Proteasome subunit alpha type-7-like OS=Homo sapiens GN=PSMA8 PE=2 SV=3	1044.56	2.27457e-05	3.90376e-14	AITVFSPDGHLFQVEYAQEAVKK	22	6	>sp|O14818|PSA7_HUMAN Proteasome subunit alpha type-7 OS=Homo sapiens GN=PSMA7 PE=1 SV=1,>sp|Q8TAA3-2|PSA7L_HUMAN Isoform 2 of Proteasome subunit alpha type-7-like OS=Homo sapiens GN=PSMA8,>sp|Q8TAA3-5|PSA7L_HUMAN Isoform 3 of Proteasome subunit alpha type-7-like OS=Homo sapiens GN=PSMA8,>sp|Q8TAA3|PSA7L_HUMAN Proteasome subunit alpha type-7-like OS=Homo sapiens GN=PSMA8 PE=2 SV=3	2576.33	4.4736e-10	4.99416e-23	>sp|O14818|PSA7_HUMAN Proteasome subunit alpha type-7 OS=Homo sapiens GN=PSMA7 PE=1 SV=1,>sp|Q8TAA3-2|PSA7L_HUMAN Isoform 2 of Proteasome subunit alpha type-7-like OS=Homo sapiens GN=PSMA8,>sp|Q8TAA3-5|PSA7L_HUMAN Isoform 3 of Proteasome subunit alpha type-7-like OS=Homo sapiens GN=PSMA8,>sp|Q8TAA3|PSA7L_HUMAN Proteasome subunit alpha type-7-like OS=Homo sapiens GN=PSMA8 PE=2 SV=3-27->sp|O14818|P…	PSMA7	PSMA7	>sp|O14818|PSA7_HUMAN Proteasome subunit alpha type-7 OS=Homo sapiens GN=PSMA7 PE=1 SV=1	>sp|O14818|PSA7_HUMAN Proteasome subunit alpha type-7 OS=Homo sapiens GN=PSMA7 PE=1 SV=1	27	52	1	sp|O14818|PSA7_HUMAN	sp|O14818|PSA7_HUMAN	PSMA7_27	PSMA7_52	AITVFSPDGHLFQVEYAQEAVKK	SVAKLQDER	PSMA7_27-PSMA7_52	27	52
3690-1-7-1-3-1	L1_20190826_HS_1023_FU_CL2_7.mgf	14640	5	2508.47	1	LAAAKEK	5	171	>sp|O43290|SNUT1_HUMAN U4/U6.U5 tri-snRNP-associated protein 1 OS=Homo sapiens GN=SART1 PE=1 SV=1	729.438	0.0849127	4.14156e-11	AKLGLKPLEVNAIKK	2	128	>sp|O43290|SNUT1_HUMAN U4/U6.U5 tri-snRNP-associated protein 1 OS=Homo sapiens GN=SART1 PE=1 SV=1	1621.03	0.0229752	1.94727e-21	>sp|O43290|SNUT1_HUMAN U4/U6.U5 tri-snRNP-associated protein 1 OS=Homo sapiens GN=SART1 PE=1 SV=1-129->sp|O43290|SNUT1_HUMAN U4/U6.U5 tri-snRNP-associated protein 1 OS=Homo sapiens GN=SART1 PE=1 SV=1-175	SART1	SART1	>sp|O43290|SNUT1_HUMAN U4/U6.U5 tri-snRNP-associated protein 1 OS=Homo sapiens GN=SART1 PE=1 SV=1	>sp|O43290|SNUT1_HUMAN U4/U6.U5 tri-snRNP-associated protein 1 OS=Homo sapiens GN=SART1 PE=1 SV=1	129	175	0	sp|O43290|SNUT1_HUMAN	sp|O43290|SNUT1_HUMAN	SART1_129	SART1_175	AKLGLKPLEVNAIKK	LAAAKEK	SART1_129-SART1_175	129	175
2040-1-7-1-2-1	L1_20190826_HS_1023_FU_CL2_5.mgf	9498	4	1800.02	1	LAAAKEK	5	171	>sp|O43290|SNUT1_HUMAN U4/U6.U5 tri-snRNP-associated protein 1 OS=Homo sapiens GN=SART1 PE=1 SV=1	729.438	1.65368e-07	9.01522e-17	LLNQKLGK	5	179	>sp|O43290|SNUT1_HUMAN U4/U6.U5 tri-snRNP-associated protein 1 OS=Homo sapiens GN=SART1 PE=1 SV=1	912.576	2.0863e-13	1.43328e-20	>sp|O43290|SNUT1_HUMAN U4/U6.U5 tri-snRNP-associated protein 1 OS=Homo sapiens GN=SART1 PE=1 SV=1-175->sp|O43290|SNUT1_HUMAN U4/U6.U5 tri-snRNP-associated protein 1 OS=Homo sapiens GN=SART1 PE=1 SV=1-183	SART1	SART1	>sp|O43290|SNUT1_HUMAN U4/U6.U5 tri-snRNP-associated protein 1 OS=Homo sapiens GN=SART1 PE=1 SV=1	>sp|O43290|SNUT1_HUMAN U4/U6.U5 tri-snRNP-associated protein 1 OS=Homo sapiens GN=SART1 PE=1 SV=1	175	183	0	sp|O43290|SNUT1_HUMAN	sp|O43290|SNUT1_HUMAN	SART1_175	SART1_183	LAAAKEK	LLNQKLGK	SART1_175-SART1_183	175	183
4150-1-3-1-8-1	L1_20190826_HS_1023_FU_CL2_5.mgf	16557	5	3691.77	1	AEKNVELR	3	300	>sp|O43290|SNUT1_HUMAN U4/U6.U5 tri-snRNP-associated protein 1 OS=Homo sapiens GN=SART1 PE=1 SV=1	957.524	1.4951e-06	7.07358e-15	KPDYLPYAEDESVDDLAQQKPR	1	310	>sp|O43290|SNUT1_HUMAN U4/U6.U5 tri-snRNP-associated protein 1 OS=Homo sapiens GN=SART1 PE=1 SV=1	2576.24	3.38692e-20	8.11922e-40	>sp|O43290|SNUT1_HUMAN U4/U6.U5 tri-snRNP-associated protein 1 OS=Homo sapiens GN=SART1 PE=1 SV=1-302->sp|O43290|SNUT1_HUMAN U4/U6.U5 tri-snRNP-associated protein 1 OS=Homo sapiens GN=SART1 PE=1 SV=1-310	SART1	SART1	>sp|O43290|SNUT1_HUMAN U4/U6.U5 tri-snRNP-associated protein 1 OS=Homo sapiens GN=SART1 PE=1 SV=1	>sp|O43290|SNUT1_HUMAN U4/U6.U5 tri-snRNP-associated protein 1 OS=Homo sapiens GN=SART1 PE=1 SV=1	302	310	0	sp|O43290|SNUT1_HUMAN	sp|O43290|SNUT1_HUMAN	SART1_302	SART1_310	AEKNVELR	KPDYLPYAEDESVDDLAQQKPR	SART1_302-SART1_310	302	310
2669-1-13-1-1-1	L1_20190826_HS_1023_FU_CL2_3.mgf	15042	4	4304.13	2	MoSSSDTPLGTVALLQEKQK	17	759	>sp|O43290|SNUT1_HUMAN U4/U6.U5 tri-snRNP-associated protein 1 OS=Homo sapiens GN=SART1 PE=1 SV=1	2048.05	1.71665e-06	1.87664e-18	TPYIVLSGSGKSMoNANTITK	11	781	>sp|O43290|SNUT1_HUMAN U4/U6.U5 tri-snRNP-associated protein 1 OS=Homo sapiens GN=SART1 PE=1 SV=1	2097.08	2.96861e-14	1.13949e-23	>sp|O43290|SNUT1_HUMAN U4/U6.U5 tri-snRNP-associated protein 1 OS=Homo sapiens GN=SART1 PE=1 SV=1-775->sp|O43290|SNUT1_HUMAN U4/U6.U5 tri-snRNP-associated protein 1 OS=Homo sapiens GN=SART1 PE=1 SV=1-791	SART1	SART1	>sp|O43290|SNUT1_HUMAN U4/U6.U5 tri-snRNP-associated protein 1 OS=Homo sapiens GN=SART1 PE=1 SV=1	>sp|O43290|SNUT1_HUMAN U4/U6.U5 tri-snRNP-associated protein 1 OS=Homo sapiens GN=SART1 PE=1 SV=1	775	791	0	sp|O43290|SNUT1_HUMAN	sp|O43290|SNUT1_HUMAN	SART1_775	SART1_791	MoSSSDTPLGTVALLQEKQK	TPYIVLSGSGKSMoNANTITK	SART1_775-SART1_791	775	791
2905-1-24-1-15-1	L1_20190826_HS_1023_FU_CL2_3.mgf	15785	4	4095.06	1	ALNMoAIPGGPKFEPLVR	11	268	>sp|Q6P2Q9|PRP8_HUMAN Pre-mRNA-processing-splicing factor 8 OS=Homo sapiens GN=PRPF8 PE=1 SV=2	1824.99	7.16019e-16	1.84834e-25	SLQYEYKANSNLVLQADR	7	8	>sp|O75643|U520_HUMAN U5 small nuclear ribonucleoprotein 200 kDa helicase OS=Homo sapiens GN=SNRNP200 PE=1 SV=2	2111.06	7.71501e-29	6.42643e-44	>sp|O75643|U520_HUMAN U5 small nuclear ribonucleoprotein 200 kDa helicase OS=Homo sapiens GN=SNRNP200 PE=1 SV=2-14->sp|Q6P2Q9|PRP8_HUMAN Pre-mRNA-processing-splicing factor 8 OS=Homo sapiens GN=PRPF8 PE=1 SV=2-278	PRPF8	SNRNP200	>sp|Q6P2Q9|PRP8_HUMAN Pre-mRNA-processing-splicing factor 8 OS=Homo sapiens GN=PRPF8 PE=1 SV=2	>sp|O75643|U520_HUMAN U5 small nuclear ribonucleoprotein 200 kDa helicase OS=Homo sapiens GN=SNRNP200 PE=1 SV=2	278	14	0	sp|Q6P2Q9|PRP8_HUMAN	sp|O75643|U520_HUMAN	PRPF8_278	SNRNP200_14	ALNMoAIPGGPKFEPLVR	SLQYEYKANSNLVLQADR	PRPF8_278-SNRNP200_14	278	14
2312-2-5-1-15-1	L1_20190826_HS_1023_FU_CL2_4.mgf	11981	4	3430.62	1	KMoLEDPQER	1	204	>sp|Q9BUQ8|DDX23_HUMAN Probable ATP-dependent RNA helicase DDX23 OS=Homo sapiens GN=DDX23 PE=1 SV=3	1160.55	7.90467e-05	1.20951e-11	SLQYEYKANSNLVLQADR	7	8	>sp|O75643|U520_HUMAN U5 small nuclear ribonucleoprotein 200 kDa helicase OS=Homo sapiens GN=SNRNP200 PE=1 SV=2	2111.06	1.8002e-30	5.07593e-45	>sp|O75643|U520_HUMAN U5 small nuclear ribonucleoprotein 200 kDa helicase OS=Homo sapiens GN=SNRNP200 PE=1 SV=2-14->sp|Q9BUQ8|DDX23_HUMAN Probable ATP-dependent RNA helicase DDX23 OS=Homo sapiens GN=DDX23 PE=1 SV=3-204	DDX23	SNRNP200	>sp|Q9BUQ8|DDX23_HUMAN Probable ATP-dependent RNA helicase DDX23 OS=Homo sapiens GN=DDX23 PE=1 SV=3	>sp|O75643|U520_HUMAN U5 small nuclear ribonucleoprotein 200 kDa helicase OS=Homo sapiens GN=SNRNP200 PE=1 SV=2	204	14	0	sp|Q9BUQ8|DDX23_HUMAN	sp|O75643|U520_HUMAN	DDX23_204	SNRNP200_14	KMoLEDPQER	SLQYEYKANSNLVLQADR	DDX23_204-SNRNP200_14	204	14
3181-1-8-1-8-1	L1_20190826_HS_1023_FU_CL2_3.mgf	16681	4	3569.89	1	KVVLLTGETSTDLK	1	1404	>sp|O75643|U520_HUMAN U5 small nuclear ribonucleoprotein 200 kDa helicase OS=Homo sapiens GN=SNRNP200 PE=1 SV=2	1502.86	1.92598e-20	2.15084e-36	EEEVTGPVIAPLFPQKR	16	2044	>sp|O75643|U520_HUMAN U5 small nuclear ribonucleoprotein 200 kDa helicase OS=Homo sapiens GN=SNRNP200 PE=1 SV=2	1909.03	4.20676e-30	2.105e-42	>sp|O75643|U520_HUMAN U5 small nuclear ribonucleoprotein 200 kDa helicase OS=Homo sapiens GN=SNRNP200 PE=1 SV=2-1404->sp|O75643|U520_HUMAN U5 small nuclear ribonucleoprotein 200 kDa helicase OS=Homo sapiens GN=SNRNP200 PE=1 SV=2-2059	SNRNP200	SNRNP200	>sp|O75643|U520_HUMAN U5 small nuclear ribonucleoprotein 200 kDa helicase OS=Homo sapiens GN=SNRNP200 PE=1 SV=2	>sp|O75643|U520_HUMAN U5 small nuclear ribonucleoprotein 200 kDa helicase OS=Homo sapiens GN=SNRNP200 PE=1 SV=2	1404	2059	0	sp|O75643|U520_HUMAN	sp|O75643|U520_HUMAN	SNRNP200_1404	SNRNP200_2059	KVVLLTGETSTDLK	EEEVTGPVIAPLFPQKR	SNRNP200_1404-SNRNP200_2059	1404	2059
3218-1-6-1-8-1	L1_20190826_HS_1023_FU_CL2_3.mgf	16794	4	3548.91	2	LLGKGNIIISTPEK	4	1418	>sp|O75643|U520_HUMAN U5 small nuclear ribonucleoprotein 200 kDa helicase OS=Homo sapiens GN=SNRNP200 PE=1 SV=2	1481.88	2.65183e-05	4.88518e-20	EEEVTGPVIAPLFPQKR	16	2044	>sp|O75643|U520_HUMAN U5 small nuclear ribonucleoprotein 200 kDa helicase OS=Homo sapiens GN=SNRNP200 PE=1 SV=2	1909.03	4.38641e-26	9.53139e-39	>sp|O75643|U520_HUMAN U5 small nuclear ribonucleoprotein 200 kDa helicase OS=Homo sapiens GN=SNRNP200 PE=1 SV=2-1421->sp|O75643|U520_HUMAN U5 small nuclear ribonucleoprotein 200 kDa helicase OS=Homo sapiens GN=SNRNP200 PE=1 SV=2-2059	SNRNP200	SNRNP200	>sp|O75643|U520_HUMAN U5 small nuclear ribonucleoprotein 200 kDa helicase OS=Homo sapiens GN=SNRNP200 PE=1 SV=2	>sp|O75643|U520_HUMAN U5 small nuclear ribonucleoprotein 200 kDa helicase OS=Homo sapiens GN=SNRNP200 PE=1 SV=2	1421	2059	0	sp|O75643|U520_HUMAN	sp|O75643|U520_HUMAN	SNRNP200_1421	SNRNP200_2059	LLGKGNIIISTPEK	EEEVTGPVIAPLFPQKR	SNRNP200_1421-SNRNP200_2059	1421	2059
2282-1-4-1-15-1	L1_20190826_HS_1023_FU_CL2_8.mgf	10260	4	2527.29	5	NNLVKYDK	5	967	>sp|O75643|U520_HUMAN U5 small nuclear ribonucleoprotein 200 kDa helicase OS=Homo sapiens GN=SNRNP200 PE=1 SV=2	992.529	2.40225e-19	2.91998e-26	PVYHAITKHSPK	8	1545	>sp|O75643|U520_HUMAN U5 small nuclear ribonucleoprotein 200 kDa helicase OS=Homo sapiens GN=SNRNP200 PE=1 SV=2	1376.76	0.19555	4.9805e-18	>sp|O75643|U520_HUMAN U5 small nuclear ribonucleoprotein 200 kDa helicase OS=Homo sapiens GN=SNRNP200 PE=1 SV=2-1552->sp|O75643|U520_HUMAN U5 small nuclear ribonucleoprotein 200 kDa helicase OS=Homo sapiens GN=SNRNP200 PE=1 SV=2-971	SNRNP200	SNRNP200	>sp|O75643|U520_HUMAN U5 small nuclear ribonucleoprotein 200 kDa helicase OS=Homo sapiens GN=SNRNP200 PE=1 SV=2	>sp|O75643|U520_HUMAN U5 small nuclear ribonucleoprotein 200 kDa helicase OS=Homo sapiens GN=SNRNP200 PE=1 SV=2	1552	971	0	sp|O75643|U520_HUMAN	sp|O75643|U520_HUMAN	SNRNP200_1552	SNRNP200_971	PVYHAITKHSPK	NNLVKYDK	SNRNP200_1552-SNRNP200_971	1552	971
3410-1-5-1-22-1	L1_20190826_HS_1023_FU_CL2_7.mgf	13754	4	2946.52	1	YHVLVNLGKK	9	169	>sp|O75643|U520_HUMAN U5 small nuclear ribonucleoprotein 200 kDa helicase OS=Homo sapiens GN=SNRNP200 PE=1 SV=2	1169.69	0.000134185	4.97136e-12	QTKEQSQLTATQTR	3	2032	>sp|Q6P2Q9|PRP8_HUMAN Pre-mRNA-processing-splicing factor 8 OS=Homo sapiens GN=PRPF8 PE=1 SV=2	1618.83	7.25168e-17	2.1791e-26	>sp|O75643|U520_HUMAN U5 small nuclear ribonucleoprotein 200 kDa helicase OS=Homo sapiens GN=SNRNP200 PE=1 SV=2-177->sp|Q6P2Q9|PRP8_HUMAN Pre-mRNA-processing-splicing factor 8 OS=Homo sapiens GN=PRPF8 PE=1 SV=2-2034	PRPF8	SNRNP200	>sp|Q6P2Q9|PRP8_HUMAN Pre-mRNA-processing-splicing factor 8 OS=Homo sapiens GN=PRPF8 PE=1 SV=2	>sp|O75643|U520_HUMAN U5 small nuclear ribonucleoprotein 200 kDa helicase OS=Homo sapiens GN=SNRNP200 PE=1 SV=2	2034	177	0	sp|Q6P2Q9|PRP8_HUMAN	sp|O75643|U520_HUMAN	PRPF8_2034	SNRNP200_177	QTKEQSQLTATQTR	YHVLVNLGKK	PRPF8_2034-SNRNP200_177	2034	177
6760-1-8-1-13-1	L1_20190826_HS_1023_FU_CL2_6.mgf	24519	4	3407.65	1	IMGKMEADPELSK	4	346	>sp|O75643|U520_HUMAN U5 small nuclear ribonucleoprotein 200 kDa helicase OS=Homo sapiens GN=SNRNP200 PE=1 SV=2	1447.71	0.00709633	5.20675e-17	KADEVLEILKTASDDR	10	285	>sp|O75643|U520_HUMAN U5 small nuclear ribonucleoprotein 200 kDa helicase OS=Homo sapiens GN=SNRNP200 PE=1 SV=2	1801.94	0.016028	1.48301e-14	>sp|O75643|U520_HUMAN U5 small nuclear ribonucleoprotein 200 kDa helicase OS=Homo sapiens GN=SNRNP200 PE=1 SV=2-294->sp|O75643|U520_HUMAN U5 small nuclear ribonucleoprotein 200 kDa helicase OS=Homo sapiens GN=SNRNP200 PE=1 SV=2-349	SNRNP200	SNRNP200	>sp|O75643|U520_HUMAN U5 small nuclear ribonucleoprotein 200 kDa helicase OS=Homo sapiens GN=SNRNP200 PE=1 SV=2	>sp|O75643|U520_HUMAN U5 small nuclear ribonucleoprotein 200 kDa helicase OS=Homo sapiens GN=SNRNP200 PE=1 SV=2	294	349	0	sp|O75643|U520_HUMAN	sp|O75643|U520_HUMAN	SNRNP200_294	SNRNP200_349	KADEVLEILKTASDDR	IMGKMEADPELSK	SNRNP200_294-SNRNP200_349	294	349
6166-1-5-1-188-1	L1_20190826_HS_1023_FU_CL2_8.mgf	22553	6	4112.17	1	IQSKLYR	4	484	>sp|O75643|U520_HUMAN U5 small nuclear ribonucleoprotein 200 kDa helicase OS=Homo sapiens GN=SNRNP200 PE=1 SV=2	906.529	0.000632629	5.94042e-13	KGYEEVHVPALKPKPFGSEEQLLPVEK	14	440	>sp|O75643|U520_HUMAN U5 small nuclear ribonucleoprotein 200 kDa helicase OS=Homo sapiens GN=SNRNP200 PE=1 SV=2	3047.63	1.66864e-24	6.75591e-47	>sp|O75643|U520_HUMAN U5 small nuclear ribonucleoprotein 200 kDa helicase OS=Homo sapiens GN=SNRNP200 PE=1 SV=2-453->sp|O75643|U520_HUMAN U5 small nuclear ribonucleoprotein 200 kDa helicase OS=Homo sapiens GN=SNRNP200 PE=1 SV=2-487	SNRNP200	SNRNP200	>sp|O75643|U520_HUMAN U5 small nuclear ribonucleoprotein 200 kDa helicase OS=Homo sapiens GN=SNRNP200 PE=1 SV=2	>sp|O75643|U520_HUMAN U5 small nuclear ribonucleoprotein 200 kDa helicase OS=Homo sapiens GN=SNRNP200 PE=1 SV=2	453	487	0	sp|O75643|U520_HUMAN	sp|O75643|U520_HUMAN	SNRNP200_453	SNRNP200_487	KGYEEVHVPALKPKPFGSEEQLLPVEK	IQSKLYR	SNRNP200_453-SNRNP200_487	453	487
3092-1-5-1-11-1	L1_20190826_HS_1023_FU_CL2_3.mgf	16405	4	3568.79	2	YAQAGFEGFKTLNR	10	470	>sp|O75643|U520_HUMAN U5 small nuclear ribonucleoprotein 200 kDa helicase OS=Homo sapiens GN=SNRNP200 PE=1 SV=2	1600.8	6.93268e-22	2.92662e-35	PFGSEEQLLPVEKLPK	13	454	>sp|O75643|U520_HUMAN U5 small nuclear ribonucleoprotein 200 kDa helicase OS=Homo sapiens GN=SNRNP200 PE=1 SV=2	1809.99	1.56927e-08	1.76804e-20	>sp|O75643|U520_HUMAN U5 small nuclear ribonucleoprotein 200 kDa helicase OS=Homo sapiens GN=SNRNP200 PE=1 SV=2-466->sp|O75643|U520_HUMAN U5 small nuclear ribonucleoprotein 200 kDa helicase OS=Homo sapiens GN=SNRNP200 PE=1 SV=2-479	SNRNP200	SNRNP200	>sp|O75643|U520_HUMAN U5 small nuclear ribonucleoprotein 200 kDa helicase OS=Homo sapiens GN=SNRNP200 PE=1 SV=2	>sp|O75643|U520_HUMAN U5 small nuclear ribonucleoprotein 200 kDa helicase OS=Homo sapiens GN=SNRNP200 PE=1 SV=2	466	479	0	sp|O75643|U520_HUMAN	sp|O75643|U520_HUMAN	SNRNP200_466	SNRNP200_479	PFGSEEQLLPVEKLPK	YAQAGFEGFKTLNR	SNRNP200_466-SNRNP200_479	466	479
3513-1-4-1-5-1	L1_20190826_HS_1023_FU_CL2_4.mgf	15982	4	3211.54	1	SLVQEMoVGSFGKR	12	546	>sp|O75643|U520_HUMAN U5 small nuclear ribonucleoprotein 200 kDa helicase OS=Homo sapiens GN=SNRNP200 PE=1 SV=2	1452.74	2.13248e-12	3.26713e-21	YAQAGFEGFKTLNR	10	470	>sp|O75643|U520_HUMAN U5 small nuclear ribonucleoprotein 200 kDa helicase OS=Homo sapiens GN=SNRNP200 PE=1 SV=2	1600.8	4.08891e-23	1.56374e-33	>sp|O75643|U520_HUMAN U5 small nuclear ribonucleoprotein 200 kDa helicase OS=Homo sapiens GN=SNRNP200 PE=1 SV=2-479->sp|O75643|U520_HUMAN U5 small nuclear ribonucleoprotein 200 kDa helicase OS=Homo sapiens GN=SNRNP200 PE=1 SV=2-557	SNRNP200	SNRNP200	>sp|O75643|U520_HUMAN U5 small nuclear ribonucleoprotein 200 kDa helicase OS=Homo sapiens GN=SNRNP200 PE=1 SV=2	>sp|O75643|U520_HUMAN U5 small nuclear ribonucleoprotein 200 kDa helicase OS=Homo sapiens GN=SNRNP200 PE=1 SV=2	479	557	0	sp|O75643|U520_HUMAN	sp|O75643|U520_HUMAN	SNRNP200_479	SNRNP200_557	YAQAGFEGFKTLNR	SLVQEMoVGSFGKR	SNRNP200_479-SNRNP200_557	479	557
3223-1-2-1-7-1	L1_20190826_HS_1023_FU_CL2_5.mgf	13715	4	2499.24	1	NNLVKYDK	5	967	>sp|O75643|U520_HUMAN U5 small nuclear ribonucleoprotein 200 kDa helicase OS=Homo sapiens GN=SNRNP200 PE=1 SV=2	992.529	3.51864e-09	7.81537e-17	KTGNFQVTELGR	1	975	>sp|O75643|U520_HUMAN U5 small nuclear ribonucleoprotein 200 kDa helicase OS=Homo sapiens GN=SNRNP200 PE=1 SV=2	1348.71	3.21154e-22	6.86602e-31	>sp|O75643|U520_HUMAN U5 small nuclear ribonucleoprotein 200 kDa helicase OS=Homo sapiens GN=SNRNP200 PE=1 SV=2-971->sp|O75643|U520_HUMAN U5 small nuclear ribonucleoprotein 200 kDa helicase OS=Homo sapiens GN=SNRNP200 PE=1 SV=2-975	SNRNP200	SNRNP200	>sp|O75643|U520_HUMAN U5 small nuclear ribonucleoprotein 200 kDa helicase OS=Homo sapiens GN=SNRNP200 PE=1 SV=2	>sp|O75643|U520_HUMAN U5 small nuclear ribonucleoprotein 200 kDa helicase OS=Homo sapiens GN=SNRNP200 PE=1 SV=2	971	975	0	sp|O75643|U520_HUMAN	sp|O75643|U520_HUMAN	SNRNP200_971	SNRNP200_975	NNLVKYDK	KTGNFQVTELGR	SNRNP200_971-SNRNP200_975	971	975
2059-1-10-1-4-1	L1_20190826_HS_1023_FU_CL2_4.mgf	11140	4	3407.57	1	GKYYAVNYPLR	2	219	>sp|Q13547|HDAC1_HUMAN Histone deacetylase 1 OS=Homo sapiens GN=HDAC1 PE=1 SV=1,>tr|Q5TEE2|Q5TEE2_HUMAN Histone deacetylase 1 (Fragment) OS=Homo sapiens GN=HDAC1 PE=1 SV=1	1342.7	5.01653e-14	1.60466e-25	EFEEESKQPGVSEQQR	7	65	>sp|O94776|MTA2_HUMAN Metastasis-associated protein MTA2 OS=Homo sapiens GN=MTA2 PE=1 SV=1	1905.87	1.16965e-14	5.32945e-27	>sp|O94776|MTA2_HUMAN Metastasis-associated protein MTA2 OS=Homo sapiens GN=MTA2 PE=1 SV=1-71->sp|Q13547|HDAC1_HUMAN Histone deacetylase 1 OS=Homo sapiens GN=HDAC1 PE=1 SV=1,>tr|Q5TEE2|Q5TEE2_HUMAN Histone deacetylase 1 (Fragment) OS=Homo sapiens GN=HDAC1 PE=1 SV=1-220	HDAC1	MTA2	>sp|Q13547|HDAC1_HUMAN Histone deacetylase 1 OS=Homo sapiens GN=HDAC1 PE=1 SV=1	>sp|O94776|MTA2_HUMAN Metastasis-associated protein MTA2 OS=Homo sapiens GN=MTA2 PE=1 SV=1	220	71	1	sp|Q13547|HDAC1_HUMAN	sp|O94776|MTA2_HUMAN	HDAC1_220	MTA2_71	GKYYAVNYPLR	EFEEESKQPGVSEQQR	HDAC1_220-MTA2_71	220	71
2013-1-8-1-4-1	L1_20190826_HS_1023_FU_CL2_4.mgf	10972	4	3425.53	1	GKYYAVNFPMoR	2	190	>sp|Q92769-3|HDAC2_HUMAN Isoform 2 of Histone deacetylase 2 OS=Homo sapiens GN=HDAC2,>sp|Q92769|HDAC2_HUMAN Histone deacetylase 2 OS=Homo sapiens GN=HDAC2 PE=1 SV=2	1360.66	2.60779e-12	1.60007e-22	EFEEESKQPGVSEQQR	7	65	>sp|O94776|MTA2_HUMAN Metastasis-associated protein MTA2 OS=Homo sapiens GN=MTA2 PE=1 SV=1	1905.87	3.38309e-11	6.83408e-23	>sp|O94776|MTA2_HUMAN Metastasis-associated protein MTA2 OS=Homo sapiens GN=MTA2 PE=1 SV=1-71->sp|Q92769-3|HDAC2_HUMAN Isoform 2 of Histone deacetylase 2 OS=Homo sapiens GN=HDAC2,>sp|Q92769|HDAC2_HUMAN Histone deacetylase 2 OS=Homo sapiens GN=HDAC2 PE=1 SV=2-191	HDAC2	MTA2	>sp|Q92769-3|HDAC2_HUMAN Isoform 2 of Histone deacetylase 2 OS=Homo sapiens GN=HDAC2	>sp|O94776|MTA2_HUMAN Metastasis-associated protein MTA2 OS=Homo sapiens GN=MTA2 PE=1 SV=1	0	71	1	sp|Q92769-3|HDAC2_HUMAN	sp|O94776|MTA2_HUMAN	HDAC2_0	MTA2_71	GKYYAVNFPMoR	EFEEESKQPGVSEQQR	HDAC2_0-MTA2_71	0	71
3527-1-1-1-2-1	L1_20190826_HS_1023_FU_CL2_7.mgf	14123	5	1957.15	2	LPKAAK	3	499	>sp|O94776|MTA2_HUMAN Metastasis-associated protein MTA2 OS=Homo sapiens GN=MTA2 PE=1 SV=1,>sp|O94776-2|MTA2_HUMAN Isoform 2 of Metastasis-associated protein MTA2 OS=Homo sapiens GN=MTA2	626.412	1.96439e-10	1.33966e-16	TPLKIHPLVR	4	505	>sp|O94776|MTA2_HUMAN Metastasis-associated protein MTA2 OS=Homo sapiens GN=MTA2 PE=1 SV=1,>sp|O94776-2|MTA2_HUMAN Isoform 2 of Metastasis-associated protein MTA2 OS=Homo sapiens GN=MTA2	1172.74	2.43293e-17	6.44799e-33	>sp|O94776|MTA2_HUMAN Metastasis-associated protein MTA2 OS=Homo sapiens GN=MTA2 PE=1 SV=1,>sp|O94776-2|MTA2_HUMAN Isoform 2 of Metastasis-associated protein MTA2 OS=Homo sapiens GN=MTA2-501->sp|O94776|MTA2_HUMAN Metastasis-associated protein MTA2 OS=Homo sapiens GN=MTA2 PE=1 SV=1,>sp|O94776-2|MTA2_HUMAN Isoform 2 of Metastasis-associated protein MTA2 OS=Homo sapiens GN=MTA2-508	MTA2	MTA2	>sp|O94776|MTA2_HUMAN Metastasis-associated protein MTA2 OS=Homo sapiens GN=MTA2 PE=1 SV=1	>sp|O94776|MTA2_HUMAN Metastasis-associated protein MTA2 OS=Homo sapiens GN=MTA2 PE=1 SV=1	501	508	1	sp|O94776|MTA2_HUMAN	sp|O94776|MTA2_HUMAN	MTA2_501	MTA2_508	LPKAAK	TPLKIHPLVR	MTA2_501-MTA2_508	501	508
3831-1-1-1-1-1	L1_20190826_HS_1023_FU_CL2_3.mgf	18632	4	3799.96	1	ASKEMoFEDTVEER	3	2	>tr|E9PC52|E9PC52_HUMAN Histone-binding protein RBBP7 OS=Homo sapiens GN=RBBP7 PE=1 SV=1,>sp|Q16576|RBBP7_HUMAN Histone-binding protein RBBP7 OS=Homo sapiens GN=RBBP7 PE=1 SV=1	1627.7	1.79149e-11	1.79149e-11	LPLATIVKDLVAQAPLKPK	8	515	>sp|O94776|MTA2_HUMAN Metastasis-associated protein MTA2 OS=Homo sapiens GN=MTA2 PE=1 SV=1,>sp|O94776-2|MTA2_HUMAN Isoform 2 of Metastasis-associated protein MTA2 OS=Homo sapiens GN=MTA2	2014.26	0.317628	3.70167e-27	>sp|O94776|MTA2_HUMAN Metastasis-associated protein MTA2 OS=Homo sapiens GN=MTA2 PE=1 SV=1,>sp|O94776-2|MTA2_HUMAN Isoform 2 of Metastasis-associated protein MTA2 OS=Homo sapiens GN=MTA2-522->tr|E9PC52|E9PC52_HUMAN Histone-binding protein RBBP7 OS=Homo sapiens GN=RBBP7 PE=1 SV=1,>sp|Q16576|RBBP7_HUMAN Histone-binding protein RBBP7 OS=Homo sapiens GN=RBBP7 PE=1 SV=1-4	MTA2	RBBP7	>sp|O94776|MTA2_HUMAN Metastasis-associated protein MTA2 OS=Homo sapiens GN=MTA2 PE=1 SV=1	>tr|E9PC52|E9PC52_HUMAN Histone-binding protein RBBP7 OS=Homo sapiens GN=RBBP7 PE=1 SV=1	522	1	1	sp|O94776|MTA2_HUMAN	tr|E9PC52|E9PC52_HUMAN	MTA2_522	RBBP7_1	LPLATIVKDLVAQAPLKPK	ASKEMoFEDTVEER	MTA2_522-RBBP7_1	522	1
5783-1-3-1-11-1	L1_20190826_HS_1023_FU_CL2_6.mgf	21227	5	3295.67	3	KALTHLEMoR	1	618	>sp|O94776|MTA2_HUMAN Metastasis-associated protein MTA2 OS=Homo sapiens GN=MTA2 PE=1 SV=1,>sp|O94776-2|MTA2_HUMAN Isoform 2 of Metastasis-associated protein MTA2 OS=Homo sapiens GN=MTA2	1113.6	1	1.69952e-14	LNPADAPNPVVFVATKDTR	16	596	>sp|O94776|MTA2_HUMAN Metastasis-associated protein MTA2 OS=Homo sapiens GN=MTA2 PE=1 SV=1,>sp|O94776-2|MTA2_HUMAN Isoform 2 of Metastasis-associated protein MTA2 OS=Homo sapiens GN=MTA2	2024.07	5.01733e-40	4.15691e-52	>sp|O94776|MTA2_HUMAN Metastasis-associated protein MTA2 OS=Homo sapiens GN=MTA2 PE=1 SV=1,>sp|O94776-2|MTA2_HUMAN Isoform 2 of Metastasis-associated protein MTA2 OS=Homo sapiens GN=MTA2-611->sp|O94776|MTA2_HUMAN Metastasis-associated protein MTA2 OS=Homo sapiens GN=MTA2 PE=1 SV=1,>sp|O94776-2|MTA2_HUMAN Isoform 2 of Metastasis-associated protein MTA2 OS=Homo sapiens GN=MTA2-618	MTA2	MTA2	>sp|O94776|MTA2_HUMAN Metastasis-associated protein MTA2 OS=Homo sapiens GN=MTA2 PE=1 SV=1	>sp|O94776|MTA2_HUMAN Metastasis-associated protein MTA2 OS=Homo sapiens GN=MTA2 PE=1 SV=1	-1	611	1	sp|O94776|MTA2_HUMAN	sp|O94776|MTA2_HUMAN	MTA2_	1	KALTHLEMoR	LNPADAPNPVVFVATKDTR	MTA2_-1-MTA2_611	-1	611
2518-1-1-1-12-1	L1_20190826_HS_1023_FU_CL2_8.mgf	11042	4	2646.33	1	HSKGVAK	3	664	>sp|Q6P2Q9|PRP8_HUMAN Pre-mRNA-processing-splicing factor 8 OS=Homo sapiens GN=PRPF8 PE=1 SV=2	725.418	2.88319e-06	2.31676e-12	MoERPKIQQQFSDLK	5	133	>sp|O94906|PRP6_HUMAN Pre-mRNA-processing factor 6 OS=Homo sapiens GN=PRPF6 PE=1 SV=1,>sp|O94906-2|PRP6_HUMAN Isoform 2 of Pre-mRNA-processing factor 6 OS=Homo sapiens GN=PRPF6	1762.9	2.22063e-08	8.27825e-20	>sp|O94906|PRP6_HUMAN Pre-mRNA-processing factor 6 OS=Homo sapiens GN=PRPF6 PE=1 SV=1,>sp|O94906-2|PRP6_HUMAN Isoform 2 of Pre-mRNA-processing factor 6 OS=Homo sapiens GN=PRPF6-137->sp|Q6P2Q9|PRP8_HUMAN Pre-mRNA-processing-splicing factor 8 OS=Homo sapiens GN=PRPF8 PE=1 SV=2-666	PRPF6	PRPF8	>sp|O94906|PRP6_HUMAN Pre-mRNA-processing factor 6 OS=Homo sapiens GN=PRPF6 PE=1 SV=1	>sp|Q6P2Q9|PRP8_HUMAN Pre-mRNA-processing-splicing factor 8 OS=Homo sapiens GN=PRPF8 PE=1 SV=2	3	666	1	sp|O94906|PRP6_HUMAN	sp|Q6P2Q9|PRP8_HUMAN	PRPF6_3	PRPF8_666	MoERPKIQQQFSDLK	HSKGVAK	PRPF6_3-PRPF8_666	3	666
2725-3-8-1-12-1	L1_20190826_HS_1023_FU_CL2_7.mgf	11525	4	2653.33	1	TVTKQR	4	671	>sp|Q6P2Q9|PRP8_HUMAN Pre-mRNA-processing-splicing factor 8 OS=Homo sapiens GN=PRPF8 PE=1 SV=2	731.429	4.06114e-06	7.68545e-13	MoERPKIQQQFSDLK	5	133	>sp|O94906|PRP6_HUMAN Pre-mRNA-processing factor 6 OS=Homo sapiens GN=PRPF6 PE=1 SV=1,>sp|O94906-2|PRP6_HUMAN Isoform 2 of Pre-mRNA-processing factor 6 OS=Homo sapiens GN=PRPF6	1762.9	1.40077e-09	1.32653e-21	>sp|O94906|PRP6_HUMAN Pre-mRNA-processing factor 6 OS=Homo sapiens GN=PRPF6 PE=1 SV=1,>sp|O94906-2|PRP6_HUMAN Isoform 2 of Pre-mRNA-processing factor 6 OS=Homo sapiens GN=PRPF6-137->sp|Q6P2Q9|PRP8_HUMAN Pre-mRNA-processing-splicing factor 8 OS=Homo sapiens GN=PRPF8 PE=1 SV=2-674	PRPF6	PRPF8	>sp|O94906|PRP6_HUMAN Pre-mRNA-processing factor 6 OS=Homo sapiens GN=PRPF6 PE=1 SV=1	>sp|Q6P2Q9|PRP8_HUMAN Pre-mRNA-processing-splicing factor 8 OS=Homo sapiens GN=PRPF8 PE=1 SV=2	3	674	1	sp|O94906|PRP6_HUMAN	sp|Q6P2Q9|PRP8_HUMAN	PRPF6_3	PRPF8_674	MoERPKIQQQFSDLK	TVTKQR	PRPF6_3-PRPF8_674	3	674
5564-1-11-1-16-1	L1_20190826_HS_1023_FU_CL2_5.mgf	21451	4	3901.96	1	LEEVTGKLQVAR	7	318	>sp|O94906|PRP6_HUMAN Pre-mRNA-processing factor 6 OS=Homo sapiens GN=PRPF6 PE=1 SV=1,>sp|O94906-2|PRP6_HUMAN Isoform 2 of Pre-mRNA-processing factor 6 OS=Homo sapiens GN=PRPF6	1341.76	9.02275e-18	1.20781e-33	GYLTDLNSMIPTHGGDINDIKK	21	272	>sp|O94906|PRP6_HUMAN Pre-mRNA-processing factor 6 OS=Homo sapiens GN=PRPF6 PE=1 SV=1,>sp|O94906-2|PRP6_HUMAN Isoform 2 of Pre-mRNA-processing factor 6 OS=Homo sapiens GN=PRPF6	2401.19	6.85513e-17	7.00135e-31	>sp|O94906|PRP6_HUMAN Pre-mRNA-processing factor 6 OS=Homo sapiens GN=PRPF6 PE=1 SV=1,>sp|O94906-2|PRP6_HUMAN Isoform 2 of Pre-mRNA-processing factor 6 OS=Homo sapiens GN=PRPF6-292->sp|O94906|PRP6_HUMAN Pre-mRNA-processing factor 6 OS=Homo sapiens GN=PRPF6 PE=1 SV=1,>sp|O94906-2|PRP6_HUMAN Isoform 2 of Pre-mRNA-processing factor 6 OS=Homo sapiens GN=PRPF6-324	PRPF6	PRPF6	>sp|O94906|PRP6_HUMAN Pre-mRNA-processing factor 6 OS=Homo sapiens GN=PRPF6 PE=1 SV=1	>sp|O94906|PRP6_HUMAN Pre-mRNA-processing factor 6 OS=Homo sapiens GN=PRPF6 PE=1 SV=1	292	324	1	sp|O94906|PRP6_HUMAN	sp|O94906|PRP6_HUMAN	PRPF6_292	PRPF6_324	GYLTDLNSMIPTHGGDINDIKK	LEEVTGKLQVAR	PRPF6_292-PRPF6_324	292	324
2794-1-7-1-11-1	L1_20190826_HS_1023_FU_CL2_4.mgf	13721	4	2327.32	1	LLLKSVR	4	296	>sp|O94906|PRP6_HUMAN Pre-mRNA-processing factor 6 OS=Homo sapiens GN=PRPF6 PE=1 SV=1,>sp|O94906-2|PRP6_HUMAN Isoform 2 of Pre-mRNA-processing factor 6 OS=Homo sapiens GN=PRPF6	827.559	1.1849e-07	3.23974e-15	LEEVTGKLQVAR	7	318	>sp|O94906|PRP6_HUMAN Pre-mRNA-processing factor 6 OS=Homo sapiens GN=PRPF6 PE=1 SV=1,>sp|O94906-2|PRP6_HUMAN Isoform 2 of Pre-mRNA-processing factor 6 OS=Homo sapiens GN=PRPF6	1341.76	8.83582e-25	3.93447e-35	>sp|O94906|PRP6_HUMAN Pre-mRNA-processing factor 6 OS=Homo sapiens GN=PRPF6 PE=1 SV=1,>sp|O94906-2|PRP6_HUMAN Isoform 2 of Pre-mRNA-processing factor 6 OS=Homo sapiens GN=PRPF6-299->sp|O94906|PRP6_HUMAN Pre-mRNA-processing factor 6 OS=Homo sapiens GN=PRPF6 PE=1 SV=1,>sp|O94906-2|PRP6_HUMAN Isoform 2 of Pre-mRNA-processing factor 6 OS=Homo sapiens GN=PRPF6-324	PRPF6	PRPF6	>sp|O94906|PRP6_HUMAN Pre-mRNA-processing factor 6 OS=Homo sapiens GN=PRPF6 PE=1 SV=1	>sp|O94906|PRP6_HUMAN Pre-mRNA-processing factor 6 OS=Homo sapiens GN=PRPF6 PE=1 SV=1	299	324	1	sp|O94906|PRP6_HUMAN	sp|O94906|PRP6_HUMAN	PRPF6_299	PRPF6_324	LLLKSVR	LEEVTGKLQVAR	PRPF6_299-PRPF6_324	299	324
4845-1-11-1-13-1	L1_20190826_HS_1023_FU_CL2_7.mgf	18202	4	2798.35	1	AAYFEKNHGTR	6	580	>sp|O94906|PRP6_HUMAN Pre-mRNA-processing factor 6 OS=Homo sapiens GN=PRPF6 PE=1 SV=1,>sp|O94906-2|PRP6_HUMAN Isoform 2 of Pre-mRNA-processing factor 6 OS=Homo sapiens GN=PRPF6	1292.63	1	3.25548e-11	AEVLWLMoGAKSK	10	607	>sp|O94906|PRP6_HUMAN Pre-mRNA-processing factor 6 OS=Homo sapiens GN=PRPF6 PE=1 SV=1,>sp|O94906-2|PRP6_HUMAN Isoform 2 of Pre-mRNA-processing factor 6 OS=Homo sapiens GN=PRPF6	1347.72	9.46196e-33	1.59312e-43	>sp|O94906|PRP6_HUMAN Pre-mRNA-processing factor 6 OS=Homo sapiens GN=PRPF6 PE=1 SV=1,>sp|O94906-2|PRP6_HUMAN Isoform 2 of Pre-mRNA-processing factor 6 OS=Homo sapiens GN=PRPF6-585->sp|O94906|PRP6_HUMAN Pre-mRNA-processing factor 6 OS=Homo sapiens GN=PRPF6 PE=1 SV=1,>sp|O94906-2|PRP6_HUMAN Isoform 2 of Pre-mRNA-processing factor 6 OS=Homo sapiens GN=PRPF6-616	PRPF6	PRPF6	>sp|O94906|PRP6_HUMAN Pre-mRNA-processing factor 6 OS=Homo sapiens GN=PRPF6 PE=1 SV=1	>sp|O94906|PRP6_HUMAN Pre-mRNA-processing factor 6 OS=Homo sapiens GN=PRPF6 PE=1 SV=1	585	8	1	sp|O94906|PRP6_HUMAN	sp|O94906|PRP6_HUMAN	PRPF6_585	PRPF6_8	AAYFEKNHGTR	AEVLWLMoGAKSK	PRPF6_585-PRPF6_8	585	8
3197-1-12-1-8-1	L1_20190826_HS_1023_FU_CL2_7.mgf	13037	4	2846.38	1	AAYFEKNHGTR	6	580	>sp|O94906|PRP6_HUMAN Pre-mRNA-processing factor 6 OS=Homo sapiens GN=PRPF6 PE=1 SV=1,>sp|O94906-2|PRP6_HUMAN Isoform 2 of Pre-mRNA-processing factor 6 OS=Homo sapiens GN=PRPF6	1292.63	1	4.00549e-12	KLVDPVAGSGGPGSR	1	26	>sp|O95400|CD2B2_HUMAN CD2 antigen cytoplasmic tail-binding protein 2 OS=Homo sapiens GN=CD2BP2 PE=1 SV=1,>sp|O95400|CD2B2	1395.75	7.13984e-36	7.13984e-36	>sp|O94906|PRP6_HUMAN Pre-mRNA-processing factor 6 OS=Homo sapiens GN=PRPF6 PE=1 SV=1,>sp|O94906-2|PRP6_HUMAN Isoform 2 of Pre-mRNA-processing factor 6 OS=Homo sapiens GN=PRPF6-585->sp|O95400|CD2B2_HUMAN CD2 antigen cytoplasmic tail-binding protein 2 OS=Homo sapiens GN=CD2BP2 PE=1 SV=1,>sp|O95400|CD2B2-26	CD2BP2	PRPF6	>sp|O95400|CD2B2_HUMAN CD2 antigen cytoplasmic tail-binding protein 2 OS=Homo sapiens GN=CD2BP2 PE=1 SV=1	>sp|O94906|PRP6_HUMAN Pre-mRNA-processing factor 6 OS=Homo sapiens GN=PRPF6 PE=1 SV=1	26	585	1	sp|O95400|CD2B2_HUMAN	sp|O94906|PRP6_HUMAN	CD2BP2_26	PRPF6_585	KLVDPVAGSGGPGSR	AAYFEKNHGTR	CD2BP2_26-PRPF6_585	26	585
4545-1-4-1-108-1	L1_20190826_HS_1023_FU_CL2_7.mgf	17275	5	2284.25	1	AQLKGVR	4	1359	>sp|O95248-4|MTMR5_HUMAN Isoform 4 of Myotubularin-related protein 5 OS=Homo sapiens GN=SBF1,>tr|G5E933|G5E933_HUMAN Myotubularin-related protein 5 OS=Homo sapiens GN=SBF1 PE=1 SV=1,>sp|O95248|MTMR5_HUMAN Myotubularin-related protein 5 OS=Homo sapiens GN=SBF1 PE=1 SV=3	770.476	0.000583192	6.75664e-11	SGGLHGKGVVGLFK	7	1209	>sp|O95248-4|MTMR5_HUMAN Isoform 4 of Myotubularin-related protein 5 OS=Homo sapiens GN=SBF1,>tr|G5E933|G5E933_HUMAN Myotubularin-related protein 5 OS=Homo sapiens GN=SBF1 PE=1 SV=1,>sp|O95248|MTMR5_HUMAN Myotubularin-related protein 5 OS=Homo sapiens GN=SBF1 PE=1 SV=3	1354.77	1	1.03534e-20	>sp|O95248-4|MTMR5_HUMAN Isoform 4 of Myotubularin-related protein 5 OS=Homo sapiens GN=SBF1,>tr|G5E933|G5E933_HUMAN Myotubularin-related protein 5 OS=Homo sapiens GN=SBF1 PE=1 SV=1,>sp|O95248|MTMR5_HUMAN Myotubularin-related protein 5 OS=Homo sapiens GN=SBF1 PE=1 SV=3-1215->sp|O95248-4|MTMR5_HUMAN Isoform 4 of Myotubularin-related protein 5 OS=Homo sapiens GN=SBF1,>tr|G5E933|G5E933_HUMAN Myotubu…	SBF1	SBF1	>sp|O95248-4|MTMR5_HUMAN Isoform 4 of Myotubularin-related protein 5 OS=Homo sapiens GN=SBF1	>sp|O95248-4|MTMR5_HUMAN Isoform 4 of Myotubularin-related protein 5 OS=Homo sapiens GN=SBF1	1215	1362	1	sp|O95248-4|MTMR5_HUMAN	sp|O95248-4|MTMR5_HUMAN	SBF1_1215	SBF1_1362	SGGLHGKGVVGLFK	AQLKGVR	SBF1_1215-SBF1_1362	1215	1362
5280-1-6-1-6-1	L1_20190826_HS_1023_FU_CL2_4.mgf	21332	4	2954.43	1	KGPGQPSSPQR	1	188	>sp|O95400|CD2B2_HUMAN CD2 antigen cytoplasmic tail-binding protein 2 OS=Homo sapiens GN=CD2BP2 PE=1 SV=1,>sp|O95400|CD2B2	1137.59	7.07841e-09	2.6067e-17	DSWLDNIDWVKIR	11	117	>sp|O95400|CD2B2_HUMAN CD2 antigen cytoplasmic tail-binding protein 2 OS=Homo sapiens GN=CD2BP2 PE=1 SV=1,>sp|O95400|CD2B2	1658.84	1.47635e-27	4.09864e-37	>sp|O95400|CD2B2_HUMAN CD2 antigen cytoplasmic tail-binding protein 2 OS=Homo sapiens GN=CD2BP2 PE=1 SV=1,>sp|O95400|CD2B2-127->sp|O95400|CD2B2_HUMAN CD2 antigen cytoplasmic tail-binding protein 2 OS=Homo sapiens GN=CD2BP2 PE=1 SV=1,>sp|O95400|CD2B2-188	CD2BP2	CD2BP2	>sp|O95400|CD2B2_HUMAN CD2 antigen cytoplasmic tail-binding protein 2 OS=Homo sapiens GN=CD2BP2 PE=1 SV=1	>sp|O95400|CD2B2_HUMAN CD2 antigen cytoplasmic tail-binding protein 2 OS=Homo sapiens GN=CD2BP2 PE=1 SV=1	127	188	1	sp|O95400|CD2B2_HUMAN	sp|O95400|CD2B2_HUMAN	CD2BP2_127	CD2BP2_188	DSWLDNIDWVKIR	KGPGQPSSPQR	CD2BP2_127-CD2BP2_188	127	188
2266-1-1-1-4-1	L1_20190826_HS_1023_FU_CL2_4.mgf	11828	4	2934.39	1	GGGKGR	4	182	>sp|O95400|CD2B2_HUMAN CD2 antigen cytoplasmic tail-binding protein 2 OS=Homo sapiens GN=CD2BP2 PE=1 SV=1,>sp|O95400|CD2B2	530.292	1	6.25767e-11	VTFQGVGDEEDEDEIIVPKK	19	6	>sp|O95400|CD2B2_HUMAN CD2 antigen cytoplasmic tail-binding protein 2 OS=Homo sapiens GN=CD2BP2 PE=1 SV=1,>sp|O95400|CD2B2	2246.1	3.53531e-51	1.17835e-65	>sp|O95400|CD2B2_HUMAN CD2 antigen cytoplasmic tail-binding protein 2 OS=Homo sapiens GN=CD2BP2 PE=1 SV=1,>sp|O95400|CD2B2-185->sp|O95400|CD2B2_HUMAN CD2 antigen cytoplasmic tail-binding protein 2 OS=Homo sapiens GN=CD2BP2 PE=1 SV=1,>sp|O95400|CD2B2-24	CD2BP2	CD2BP2	>sp|O95400|CD2B2_HUMAN CD2 antigen cytoplasmic tail-binding protein 2 OS=Homo sapiens GN=CD2BP2 PE=1 SV=1	>sp|O95400|CD2B2_HUMAN CD2 antigen cytoplasmic tail-binding protein 2 OS=Homo sapiens GN=CD2BP2 PE=1 SV=1	185	24	1	sp|O95400|CD2B2_HUMAN	sp|O95400|CD2B2_HUMAN	CD2BP2_185	CD2BP2_24	GGGKGR	VTFQGVGDEEDEDEIIVPKK	CD2BP2_185-CD2BP2_24	185	24
2062-1-6-1-12-1	L1_20190826_HS_1023_FU_CL2_7.mgf	9284	4	2819.43	1	KGPGQPSSPQR	1	188	>sp|O95400|CD2B2_HUMAN CD2 antigen cytoplasmic tail-binding protein 2 OS=Homo sapiens GN=CD2BP2 PE=1 SV=1,>sp|O95400|CD2B2	1137.59	2.07825e-14	1.51127e-21	KKLVDPVAGSGGPGSR	2	25	>sp|O95400|CD2B2_HUMAN CD2 antigen cytoplasmic tail-binding protein 2 OS=Homo sapiens GN=CD2BP2 PE=1 SV=1,>sp|O95400|CD2B2	1523.84	1.04825e-21	1.01922e-33	>sp|O95400|CD2B2_HUMAN CD2 antigen cytoplasmic tail-binding protein 2 OS=Homo sapiens GN=CD2BP2 PE=1 SV=1,>sp|O95400|CD2B2-188->sp|O95400|CD2B2_HUMAN CD2 antigen cytoplasmic tail-binding protein 2 OS=Homo sapiens GN=CD2BP2 PE=1 SV=1,>sp|O95400|CD2B2-26	CD2BP2	CD2BP2	>sp|O95400|CD2B2_HUMAN CD2 antigen cytoplasmic tail-binding protein 2 OS=Homo sapiens GN=CD2BP2 PE=1 SV=1	>sp|O95400|CD2B2_HUMAN CD2 antigen cytoplasmic tail-binding protein 2 OS=Homo sapiens GN=CD2BP2 PE=1 SV=1	188	26	1	sp|O95400|CD2B2_HUMAN	sp|O95400|CD2B2_HUMAN	CD2BP2_188	CD2BP2_26	KGPGQPSSPQR	KKLVDPVAGSGGPGSR	CD2BP2_188-CD2BP2_26	188	26
2370-1-6-1-7-1	L1_20190826_HS_1023_FU_CL2_5.mgf	10697	4	2745.31	1	KGPGQPSSPQR	1	188	>sp|O95400|CD2B2_HUMAN CD2 antigen cytoplasmic tail-binding protein 2 OS=Homo sapiens GN=CD2BP2 PE=1 SV=1,>sp|O95400|CD2B2	1137.59	1.25942e-17	4.51289e-32	KLDPPGGQFYNSK	1	321	>sp|O95400|CD2B2_HUMAN CD2 antigen cytoplasmic tail-binding protein 2 OS=Homo sapiens GN=CD2BP2 PE=1 SV=1,>sp|O95400|CD2B2	1449.73	4.80303e-35	5.57429e-52	>sp|O95400|CD2B2_HUMAN CD2 antigen cytoplasmic tail-binding protein 2 OS=Homo sapiens GN=CD2BP2 PE=1 SV=1,>sp|O95400|CD2B2-188->sp|O95400|CD2B2_HUMAN CD2 antigen cytoplasmic tail-binding protein 2 OS=Homo sapiens GN=CD2BP2 PE=1 SV=1,>sp|O95400|CD2B2-321	CD2BP2	CD2BP2	>sp|O95400|CD2B2_HUMAN CD2 antigen cytoplasmic tail-binding protein 2 OS=Homo sapiens GN=CD2BP2 PE=1 SV=1	>sp|O95400|CD2B2_HUMAN CD2 antigen cytoplasmic tail-binding protein 2 OS=Homo sapiens GN=CD2BP2 PE=1 SV=1	188	321	1	sp|O95400|CD2B2_HUMAN	sp|O95400|CD2B2_HUMAN	CD2BP2_188	CD2BP2_321	KGPGQPSSPQR	KLDPPGGQFYNSK	CD2BP2_188-CD2BP2_321	188	321
2679-1-6-1-13-1	L1_20190826_HS_1023_FU_CL2_8.mgf	11562	4	2901.42	1	KGPGQPSSPQR	1	188	>sp|O95400|CD2B2_HUMAN CD2 antigen cytoplasmic tail-binding protein 2 OS=Homo sapiens GN=CD2BP2 PE=1 SV=1,>sp|O95400|CD2B2	1137.59	5.1152e-12	1.05604e-22	KLDPPGGQFYNSKR	13	321	>sp|O95400|CD2B2_HUMAN CD2 antigen cytoplasmic tail-binding protein 2 OS=Homo sapiens GN=CD2BP2 PE=1 SV=1,>sp|O95400|CD2B2	1605.83	1	2.65628e-16	>sp|O95400|CD2B2_HUMAN CD2 antigen cytoplasmic tail-binding protein 2 OS=Homo sapiens GN=CD2BP2 PE=1 SV=1,>sp|O95400|CD2B2-188->sp|O95400|CD2B2_HUMAN CD2 antigen cytoplasmic tail-binding protein 2 OS=Homo sapiens GN=CD2BP2 PE=1 SV=1,>sp|O95400|CD2B2-333	CD2BP2	CD2BP2	>sp|O95400|CD2B2_HUMAN CD2 antigen cytoplasmic tail-binding protein 2 OS=Homo sapiens GN=CD2BP2 PE=1 SV=1	>sp|O95400|CD2B2_HUMAN CD2 antigen cytoplasmic tail-binding protein 2 OS=Homo sapiens GN=CD2BP2 PE=1 SV=1	188	333	1	sp|O95400|CD2B2_HUMAN	sp|O95400|CD2B2_HUMAN	CD2BP2_188	CD2BP2_333	KGPGQPSSPQR	KLDPPGGQFYNSKR	CD2BP2_188-CD2BP2_333	188	333
2200-1-5-1-6-1	L1_20190826_HS_1023_FU_CL2_5.mgf	10043	4	2246.15	1	GGKIPNPIR	3	383	>sp|Q9BUQ8|DDX23_HUMAN Probable ATP-dependent RNA helicase DDX23 OS=Homo sapiens GN=DDX23 PE=1 SV=3	950.566	4.12407e-07	9.60658e-14	KGPGQPSSPQR	1	188	>sp|O95400|CD2B2_HUMAN CD2 antigen cytoplasmic tail-binding protein 2 OS=Homo sapiens GN=CD2BP2 PE=1 SV=1,>sp|O95400|CD2B2	1137.59	9.90528e-05	9.73928e-15	>sp|O95400|CD2B2_HUMAN CD2 antigen cytoplasmic tail-binding protein 2 OS=Homo sapiens GN=CD2BP2 PE=1 SV=1,>sp|O95400|CD2B2-188->sp|Q9BUQ8|DDX23_HUMAN Probable ATP-dependent RNA helicase DDX23 OS=Homo sapiens GN=DDX23 PE=1 SV=3-385	CD2BP2	DDX23	>sp|O95400|CD2B2_HUMAN CD2 antigen cytoplasmic tail-binding protein 2 OS=Homo sapiens GN=CD2BP2 PE=1 SV=1	>sp|Q9BUQ8|DDX23_HUMAN Probable ATP-dependent RNA helicase DDX23 OS=Homo sapiens GN=DDX23 PE=1 SV=3	188	385	1	sp|O95400|CD2B2_HUMAN	sp|Q9BUQ8|DDX23_HUMAN	CD2BP2_188	DDX23_385	KGPGQPSSPQR	GGKIPNPIR	CD2BP2_188-DDX23_385	188	385
1517-1-10-1-4-1	L1_20190826_HS_1023_FU_CL2_3.mgf	11355	4	3799.85	4	KLVDPVAGSGGPGSR	1	26	>sp|O95400|CD2B2_HUMAN CD2 antigen cytoplasmic tail-binding protein 2 OS=Homo sapiens GN=CD2BP2 PE=1 SV=1,>sp|O95400|CD2B2	1395.75	9.79272e-21	6.71695e-38	VTFQGVGDEEDEDEIIVPKK	19	6	>sp|O95400|CD2B2_HUMAN CD2 antigen cytoplasmic tail-binding protein 2 OS=Homo sapiens GN=CD2BP2 PE=1 SV=1,>sp|O95400|CD2B2	2246.1	9.58652e-39	2.33348e-52	>sp|O95400|CD2B2_HUMAN CD2 antigen cytoplasmic tail-binding protein 2 OS=Homo sapiens GN=CD2BP2 PE=1 SV=1,>sp|O95400|CD2B2-24->sp|O95400|CD2B2_HUMAN CD2 antigen cytoplasmic tail-binding protein 2 OS=Homo sapiens GN=CD2BP2 PE=1 SV=1,>sp|O95400|CD2B2-26	CD2BP2	CD2BP2	>sp|O95400|CD2B2_HUMAN CD2 antigen cytoplasmic tail-binding protein 2 OS=Homo sapiens GN=CD2BP2 PE=1 SV=1	>sp|O95400|CD2B2_HUMAN CD2 antigen cytoplasmic tail-binding protein 2 OS=Homo sapiens GN=CD2BP2 PE=1 SV=1	24	26	1	sp|O95400|CD2B2_HUMAN	sp|O95400|CD2B2_HUMAN	CD2BP2_24	CD2BP2_26	VTFQGVGDEEDEDEIIVPKK	KLVDPVAGSGGPGSR	CD2BP2_24-CD2BP2_26	24	26
2152-1-10-1-7-1	L1_20190826_HS_1023_FU_CL2_4.mgf	11465	4	3003.47	1	KLVDPVAGSGGPGSR	1	26	>sp|O95400|CD2B2_HUMAN CD2 antigen cytoplasmic tail-binding protein 2 OS=Homo sapiens GN=CD2BP2 PE=1 SV=1,>sp|O95400|CD2B2	1395.75	7.13984e-36	6.85171e-42	KLDPPGGQFYNSK	1	321	>sp|O95400|CD2B2_HUMAN CD2 antigen cytoplasmic tail-binding protein 2 OS=Homo sapiens GN=CD2BP2 PE=1 SV=1,>sp|O95400|CD2B2	1449.73	1.96014e-10	1.28149e-18	>sp|O95400|CD2B2_HUMAN CD2 antigen cytoplasmic tail-binding protein 2 OS=Homo sapiens GN=CD2BP2 PE=1 SV=1,>sp|O95400|CD2B2-26->sp|O95400|CD2B2_HUMAN CD2 antigen cytoplasmic tail-binding protein 2 OS=Homo sapiens GN=CD2BP2 PE=1 SV=1,>sp|O95400|CD2B2-321	CD2BP2	CD2BP2	>sp|O95400|CD2B2_HUMAN CD2 antigen cytoplasmic tail-binding protein 2 OS=Homo sapiens GN=CD2BP2 PE=1 SV=1	>sp|O95400|CD2B2_HUMAN CD2 antigen cytoplasmic tail-binding protein 2 OS=Homo sapiens GN=CD2BP2 PE=1 SV=1	26	321	1	sp|O95400|CD2B2_HUMAN	sp|O95400|CD2B2_HUMAN	CD2BP2_26	CD2BP2_321	KLVDPVAGSGGPGSR	KLDPPGGQFYNSK	CD2BP2_26-CD2BP2_321	26	321
4098-1-10-1-13-1	L1_20190826_HS_1023_FU_CL2_7.mgf	15903	4	3159.58	1	KLVDPVAGSGGPGSR	1	26	>sp|O95400|CD2B2_HUMAN CD2 antigen cytoplasmic tail-binding protein 2 OS=Homo sapiens GN=CD2BP2 PE=1 SV=1,>sp|O95400|CD2B2	1395.75	8.5972e-32	5.0123e-47	KLDPPGGQFYNSKR	13	321	>sp|O95400|CD2B2_HUMAN CD2 antigen cytoplasmic tail-binding protein 2 OS=Homo sapiens GN=CD2BP2 PE=1 SV=1,>sp|O95400|CD2B2	1605.83	0.320324	7.33953e-14	>sp|O95400|CD2B2_HUMAN CD2 antigen cytoplasmic tail-binding protein 2 OS=Homo sapiens GN=CD2BP2 PE=1 SV=1,>sp|O95400|CD2B2-26->sp|O95400|CD2B2_HUMAN CD2 antigen cytoplasmic tail-binding protein 2 OS=Homo sapiens GN=CD2BP2 PE=1 SV=1,>sp|O95400|CD2B2-333	CD2BP2	CD2BP2	>sp|O95400|CD2B2_HUMAN CD2 antigen cytoplasmic tail-binding protein 2 OS=Homo sapiens GN=CD2BP2 PE=1 SV=1	>sp|O95400|CD2B2_HUMAN CD2 antigen cytoplasmic tail-binding protein 2 OS=Homo sapiens GN=CD2BP2 PE=1 SV=1	26	333	1	sp|O95400|CD2B2_HUMAN	sp|O95400|CD2B2_HUMAN	CD2BP2_26	CD2BP2_333	KLVDPVAGSGGPGSR	KLDPPGGQFYNSKR	CD2BP2_26-CD2BP2_333	26	333
5488-1-12-1-3-1	L1_20190826_HS_1023_FU_CL2_6.mgf	20337	4	4009.93	1	KLDPPGGQFYNSKR	13	321	>sp|O95400|CD2B2_HUMAN CD2 antigen cytoplasmic tail-binding protein 2 OS=Homo sapiens GN=CD2BP2 PE=1 SV=1,>sp|O95400|CD2B2	1605.83	1	2.78566e-14	KVTFQGVGDEEDEDEIIVPK	1	5	>sp|O95400|CD2B2_HUMAN CD2 antigen cytoplasmic tail-binding protein 2 OS=Homo sapiens GN=CD2BP2 PE=1 SV=1,>sp|O95400|CD2B2	2246.1	8.87977e-28	2.92332e-41	>sp|O95400|CD2B2_HUMAN CD2 antigen cytoplasmic tail-binding protein 2 OS=Homo sapiens GN=CD2BP2 PE=1 SV=1,>sp|O95400|CD2B2-333->sp|O95400|CD2B2_HUMAN CD2 antigen cytoplasmic tail-binding protein 2 OS=Homo sapiens GN=CD2BP2 PE=1 SV=1,>sp|O95400|CD2B2-5	CD2BP2	CD2BP2	>sp|O95400|CD2B2_HUMAN CD2 antigen cytoplasmic tail-binding protein 2 OS=Homo sapiens GN=CD2BP2 PE=1 SV=1	>sp|O95400|CD2B2_HUMAN CD2 antigen cytoplasmic tail-binding protein 2 OS=Homo sapiens GN=CD2BP2 PE=1 SV=1	333	5	1	sp|O95400|CD2B2_HUMAN	sp|O95400|CD2B2_HUMAN	CD2BP2_333	CD2BP2_5	KLDPPGGQFYNSKR	KVTFQGVGDEEDEDEIIVPK	CD2BP2_333-CD2BP2_5	333	5
5062-1-10-1-11-1	L1_20190826_HS_1023_FU_CL2_8.mgf	19127	6	3018.58	1	IMoKAQALR	3	613	>sp|P07900|HS90A_HUMAN Heat shock protein HSP 90-alpha OS=Homo sapiens GN=HSP90AA1 PE=1 SV=5,>sp|P07900-2|HS90A_HUMAN Isoform 2 of Heat shock protein HSP 90-alpha OS=Homo sapiens GN=HSP90AA1,>sp|P08238|HS90B_HUMAN Heat shock protein HSP 90-beta OS=Homo sapiens GN=HSP90AB1 PE=1 SV=4	945.543	1	7.05584e-12	KHLEINPDHSIIETLR	1	632	>sp|P07900|HS90A_HUMAN Heat shock protein HSP 90-alpha OS=Homo sapiens GN=HSP90AA1 PE=1 SV=5,>sp|P07900-2|HS90A_HUMAN Isoform 2 of Heat shock protein HSP 90-alpha OS=Homo sapiens GN=HSP90AA1	1914.03	1	1.47011e-19	>sp|P07900|HS90A_HUMAN Heat shock protein HSP 90-alpha OS=Homo sapiens GN=HSP90AA1 PE=1 SV=5,>sp|P07900-2|HS90A_HUMAN Isoform 2 of Heat shock protein HSP 90-alpha OS=Homo sapiens GN=HSP90AA1-632->sp|P07900|HS90A_HUMAN Heat shock protein HSP 90-alpha OS=Homo sapiens GN=HSP90AA1 PE=1 SV=5,>sp|P07900-2|HS90A_HUMAN Isoform 2 of Heat shock protein HSP 90-alpha OS=Homo sapiens GN=HSP90AA1,>sp|P08238|HS…	HSP90AA1	HSP90AA1	>sp|P07900|HS90A_HUMAN Heat shock protein HSP 90-alpha OS=Homo sapiens GN=HSP90AA1 PE=1 SV=5	>sp|P07900|HS90A_HUMAN Heat shock protein HSP 90-alpha OS=Homo sapiens GN=HSP90AA1 PE=1 SV=5	1	632	1	sp|P07900|HS90A_HUMAN	sp|P07900|HS90A_HUMAN	HSP90AA1_1	HSP90AA1_632	IMoKAQALR	KHLEINPDHSIIETLR	HSP90AA1_1-HSP90AA1_632	1	632
3364-1-54-1-18-1	L1_20190826_HS_1023_FU_CL2_8.mgf	13768	6	2553.25	2	KDISENKR	1	251	>sp|P11142|HSP7C_HUMAN Heat shock cognate 71 kDa protein OS=Homo sapiens GN=HSPA8 PE=1 SV=1,>tr|E9PKE3|E9PKE3_HUMAN Heat shock cognate 71 kDa protein OS=Homo sapiens GN=HSPA8 PE=1 SV=1,>sp|P11142-2|HSP7C_HUMAN Isoform 2 of Heat shock cognate 71 kDa protein OS=Homo sapiens GN=HSPA8,>tr|E9PN89|E9PN89_HUMAN Heat shock cognate 71 kDa protein (Fragment) OS=Homo sapiens GN=HSPA8 PE=1 SV=1,>tr|E9PNE6|E9…	988.53	0.00185142	1.19407e-13	MoVNHFIAEFKR	10	237	>sp|P11142|HSP7C_HUMAN Heat shock cognate 71 kDa protein OS=Homo sapiens GN=HSPA8 PE=1 SV=1,>tr|E9PKE3|E9PKE3_HUMAN Heat shock cognate 71 kDa protein OS=Homo sapiens GN=HSPA8 PE=1 SV=1,>sp|P11142-2|HSP7C_HUMAN Isoform 2 of Heat shock cognate 71 kDa protein OS=Homo sapiens GN=HSPA8,>tr|E9PN89|E9PN89_HUMAN Heat shock cognate 71 kDa protein (Fragment) OS=Homo sapiens GN=HSPA8 PE=1 SV=1	1406.71	0.401324	1.01061e-17	>sp|P11142|HSP7C_HUMAN Heat shock cognate 71 kDa protein OS=Homo sapiens GN=HSPA8 PE=1 SV=1,>tr|E9PKE3|E9PKE3_HUMAN Heat shock cognate 71 kDa protein OS=Homo sapiens GN=HSPA8 PE=1 SV=1,>sp|P11142-2|HSP7C_HUMAN Isoform 2 of Heat shock cognate 71 kDa protein OS=Homo sapiens GN=HSPA8,>tr|E9PN89|E9PN89_HUMAN Heat shock cognate 71 kDa protein (Fragment) OS=Homo sapiens GN=HSPA8 PE=1 SV=1-246->sp|P1114…	HSPA8	HSPA8	>sp|P11142|HSP7C_HUMAN Heat shock cognate 71 kDa protein OS=Homo sapiens GN=HSPA8 PE=1 SV=1	>sp|P11142|HSP7C_HUMAN Heat shock cognate 71 kDa protein OS=Homo sapiens GN=HSPA8 PE=1 SV=1	251	8	1	sp|P11142|HSP7C_HUMAN	sp|P11142|HSP7C_HUMAN	HSPA8_251	HSPA8_8	KDISENKR	MoVNHFIAEFKR	HSPA8_251-HSPA8_8	251	8
3360-1-7-1-18-1	L1_20190826_HS_1023_FU_CL2_6.mgf	13638	4	2841.42	1	LMEVEKEK	6	1008	>sp|P12270|TPR_HUMAN Nucleoprotein TPR OS=Homo sapiens GN=TPR PE=1 SV=3	1004.52	0.000635745	5.14503e-11	LKESAEFQTQLEKK	13	994	>sp|P12270|TPR_HUMAN Nucleoprotein TPR OS=Homo sapiens GN=TPR PE=1 SV=3	1677.89	1	5.31143e-14	>sp|P12270|TPR_HUMAN Nucleoprotein TPR OS=Homo sapiens GN=TPR PE=1 SV=3-1006->sp|P12270|TPR_HUMAN Nucleoprotein TPR OS=Homo sapiens GN=TPR PE=1 SV=3-1013	TPR	TPR	>sp|P12270|TPR_HUMAN Nucleoprotein TPR OS=Homo sapiens GN=TPR PE=1 SV=3	>sp|P12270|TPR_HUMAN Nucleoprotein TPR OS=Homo sapiens GN=TPR PE=1 SV=3	1006	1013	0	sp|P12270|TPR_HUMAN	sp|P12270|TPR_HUMAN	TPR_1006	TPR_1013	LKESAEFQTQLEKK	LMEVEKEK	TPR_1006-TPR_1013	1006	1013
1724-1-5-1-6-1	L1_20190826_HS_1023_FU_CL2_4.mgf	9946	4	2059.16	1	TITQVKK	6	1430	>sp|P12270|TPR_HUMAN Nucleoprotein TPR OS=Homo sapiens GN=TPR PE=1 SV=3	816.507	3.19912e-05	1.01877e-15	IIDIQEKVK	7	1421	>sp|P12270|TPR_HUMAN Nucleoprotein TPR OS=Homo sapiens GN=TPR PE=1 SV=3	1084.65	1.86349e-08	1.39538e-19	>sp|P12270|TPR_HUMAN Nucleoprotein TPR OS=Homo sapiens GN=TPR PE=1 SV=3-1427->sp|P12270|TPR_HUMAN Nucleoprotein TPR OS=Homo sapiens GN=TPR PE=1 SV=3-1435	TPR	TPR	>sp|P12270|TPR_HUMAN Nucleoprotein TPR OS=Homo sapiens GN=TPR PE=1 SV=3	>sp|P12270|TPR_HUMAN Nucleoprotein TPR OS=Homo sapiens GN=TPR PE=1 SV=3	1427	1435	0	sp|P12270|TPR_HUMAN	sp|P12270|TPR_HUMAN	TPR_1427	TPR_1435	IIDIQEKVK	TITQVKK	TPR_1427-TPR_1435	1427	1435
1734-1-9-1-8-1	L1_20190826_HS_1023_FU_CL2_4.mgf	9988	4	2823.44	1	ITALKSQYEGR	5	1599	>sp|P12270|TPR_HUMAN Nucleoprotein TPR OS=Homo sapiens GN=TPR PE=1 SV=3	1264.68	9.83302e-11	7.43528e-26	QITLKTTPASGER	5	1644	>sp|P12270|TPR_HUMAN Nucleoprotein TPR OS=Homo sapiens GN=TPR PE=1 SV=3	1400.76	2.49164e-06	7.50657e-18	>sp|P12270|TPR_HUMAN Nucleoprotein TPR OS=Homo sapiens GN=TPR PE=1 SV=3-1603->sp|P12270|TPR_HUMAN Nucleoprotein TPR OS=Homo sapiens GN=TPR PE=1 SV=3-1648	TPR	TPR	>sp|P12270|TPR_HUMAN Nucleoprotein TPR OS=Homo sapiens GN=TPR PE=1 SV=3	>sp|P12270|TPR_HUMAN Nucleoprotein TPR OS=Homo sapiens GN=TPR PE=1 SV=3	1603	1648	0	sp|P12270|TPR_HUMAN	sp|P12270|TPR_HUMAN	TPR_1603	TPR_1648	ITALKSQYEGR	QITLKTTPASGER	TPR_1603-TPR_1648	1603	1648
1332-1-10-1-7-1	L1_20190826_HS_1023_FU_CL2_2.mgf	9283	4	3912.96	1	VTAAAMoAGNKSTPR	10	1681	>sp|P12270|TPR_HUMAN Nucleoprotein TPR OS=Homo sapiens GN=TPR PE=1 SV=3	1389.7	7.64311e-07	7.21177e-24	GIASTSDPPTANIKPTPVVSTPSK	14	1657	>sp|P12270|TPR_HUMAN Nucleoprotein TPR OS=Homo sapiens GN=TPR PE=1 SV=3	2364.25	4.96397e-19	6.98531e-30	>sp|P12270|TPR_HUMAN Nucleoprotein TPR OS=Homo sapiens GN=TPR PE=1 SV=3-1670->sp|P12270|TPR_HUMAN Nucleoprotein TPR OS=Homo sapiens GN=TPR PE=1 SV=3-1690	TPR	TPR	>sp|P12270|TPR_HUMAN Nucleoprotein TPR OS=Homo sapiens GN=TPR PE=1 SV=3	>sp|P12270|TPR_HUMAN Nucleoprotein TPR OS=Homo sapiens GN=TPR PE=1 SV=3	1670	1690	0	sp|P12270|TPR_HUMAN	sp|P12270|TPR_HUMAN	TPR_1670	TPR_1690	GIASTSDPPTANIKPTPVVSTPSK	VTAAAMoAGNKSTPR	TPR_1670-TPR_1690	1670	1690
7387-1-2-1-8-1	L1_20190826_HS_1023_FU_CL2_6.mgf	26420	4	2811.58	1	APILKR	5	434	>sp|P12270|TPR_HUMAN Nucleoprotein TPR OS=Homo sapiens GN=TPR PE=1 SV=3	696.465	0.000470673	7.88362e-14	YLDEIVKEVEAKAPILK	12	422	>sp|P12270|TPR_HUMAN Nucleoprotein TPR OS=Homo sapiens GN=TPR PE=1 SV=3	1957.11	2.61562e-27	3.24401e-43	>sp|P12270|TPR_HUMAN Nucleoprotein TPR OS=Homo sapiens GN=TPR PE=1 SV=3-433->sp|P12270|TPR_HUMAN Nucleoprotein TPR OS=Homo sapiens GN=TPR PE=1 SV=3-438	TPR	TPR	>sp|P12270|TPR_HUMAN Nucleoprotein TPR OS=Homo sapiens GN=TPR PE=1 SV=3	>sp|P12270|TPR_HUMAN Nucleoprotein TPR OS=Homo sapiens GN=TPR PE=1 SV=3	433	438	0	sp|P12270|TPR_HUMAN	sp|P12270|TPR_HUMAN	TPR_433	TPR_438	YLDEIVKEVEAKAPILK	APILKR	TPR_433-TPR_438	433	438
2177-1-4-1-4-1	L1_20190826_HS_1023_FU_CL2_4.mgf	11546	4	2643.35	1	NKELEIAQDR	2	96	>sp|P12270|TPR_HUMAN Nucleoprotein TPR OS=Homo sapiens GN=TPR PE=1 SV=3	1214.63	1.9992e-15	3.28816e-24	LNNQLKALTEK	6	85	>sp|P12270|TPR_HUMAN Nucleoprotein TPR OS=Homo sapiens GN=TPR PE=1 SV=3	1270.72	8.16257e-11	4.99772e-23	>sp|P12270|TPR_HUMAN Nucleoprotein TPR OS=Homo sapiens GN=TPR PE=1 SV=3-90->sp|P12270|TPR_HUMAN Nucleoprotein TPR OS=Homo sapiens GN=TPR PE=1 SV=3-97	TPR	TPR	>sp|P12270|TPR_HUMAN Nucleoprotein TPR OS=Homo sapiens GN=TPR PE=1 SV=3	>sp|P12270|TPR_HUMAN Nucleoprotein TPR OS=Homo sapiens GN=TPR PE=1 SV=3	90	97	0	sp|P12270|TPR_HUMAN	sp|P12270|TPR_HUMAN	TPR_90	TPR_97	LNNQLKALTEK	NKELEIAQDR	TPR_90-TPR_97	90	97
1705-1-6-1-7-1	L1_20190826_HS_1023_FU_CL2_4.mgf	9875	4	2558.3	1	KSDPVVSYR	1	572	>sp|P13639|EF2_HUMAN Elongation factor 2 OS=Homo sapiens GN=EEF2 PE=1 SV=4	1049.55	6.35461e-13	1.32067e-24	VAVEAKNPADLPK	6	507	>sp|P13639|EF2_HUMAN Elongation factor 2 OS=Homo sapiens GN=EEF2 PE=1 SV=4	1350.75	1.61041e-17	6.00289e-34	>sp|P13639|EF2_HUMAN Elongation factor 2 OS=Homo sapiens GN=EEF2 PE=1 SV=4-512->sp|P13639|EF2_HUMAN Elongation factor 2 OS=Homo sapiens GN=EEF2 PE=1 SV=4-572	EEF2	EEF2	>sp|P13639|EF2_HUMAN Elongation factor 2 OS=Homo sapiens GN=EEF2 PE=1 SV=4	>sp|P13639|EF2_HUMAN Elongation factor 2 OS=Homo sapiens GN=EEF2 PE=1 SV=4	512	572	0	sp|P13639|EF2_HUMAN	sp|P13639|EF2_HUMAN	EEF2_512	EEF2_572	VAVEAKNPADLPK	KSDPVVSYR	EEF2_512-EEF2_572	512	572
4152-1-7-1-6-1	L1_20190826_HS_1023_FU_CL2_4.mgf	17946	4	2472.33	1	SKGIAYIEFK	2	428	>sp|P19338|NUCL_HUMAN Nucleolin OS=Homo sapiens GN=NCL PE=1 SV=3,>tr|H7BY16|H7BY16_HUMAN Nucleolin (Fragment) OS=Homo sapiens GN=NCL PE=1 SV=8	1154.63	1.07546e-16	3.3957e-24	TLLAKNLPYK	5	394	>sp|P19338|NUCL_HUMAN Nucleolin OS=Homo sapiens GN=NCL PE=1 SV=3	1159.7	1.69796e-12	6.28526e-19	>sp|P19338|NUCL_HUMAN Nucleolin OS=Homo sapiens GN=NCL PE=1 SV=3-398->sp|P19338|NUCL_HUMAN Nucleolin OS=Homo sapiens GN=NCL PE=1 SV=3,>tr|H7BY16|H7BY16_HUMAN Nucleolin (Fragment) OS=Homo sapiens GN=NCL PE=1 SV=8-429	NCL	NCL	>sp|P19338|NUCL_HUMAN Nucleolin OS=Homo sapiens GN=NCL PE=1 SV=3	>sp|P19338|NUCL_HUMAN Nucleolin OS=Homo sapiens GN=NCL PE=1 SV=3	398	429	1	sp|P19338|NUCL_HUMAN	sp|P19338|NUCL_HUMAN	NCL_398	NCL_429	TLLAKNLPYK	SKGIAYIEFK	NCL_398-NCL_429	398	429
570-1-4-1-2-1	L1_20190826_HS_1023_FU_CL2_4.mgf	5099	4	1787.98	1	AAATSAKK	7	56	>sp|P19338|NUCL_HUMAN Nucleolin OS=Homo sapiens GN=NCL PE=1 SV=3	746.429	1.15366e-11	2.31417e-21	KVAVATPAK	1	71	>sp|P19338|NUCL_HUMAN Nucleolin OS=Homo sapiens GN=NCL PE=1 SV=3	883.549	2.94073e-11	1.66214e-20	>sp|P19338|NUCL_HUMAN Nucleolin OS=Homo sapiens GN=NCL PE=1 SV=3-62->sp|P19338|NUCL_HUMAN Nucleolin OS=Homo sapiens GN=NCL PE=1 SV=3-71	NCL	NCL	>sp|P19338|NUCL_HUMAN Nucleolin OS=Homo sapiens GN=NCL PE=1 SV=3	>sp|P19338|NUCL_HUMAN Nucleolin OS=Homo sapiens GN=NCL PE=1 SV=3	62	71	0	sp|P19338|NUCL_HUMAN	sp|P19338|NUCL_HUMAN	NCL_62	NCL_71	AAATSAKK	KVAVATPAK	NCL_62-NCL_71	62	71
3832-1-5-1-1-1	L1_20190826_HS_1023_FU_CL2_5.mgf	15592	4	2092.18	1	GPIGSKTR	6	162	>sp|P25705|ATPA_HUMAN ATP synthase subunit alpha, mitochondrial OS=Homo sapiens GN=ATP5A1 PE=1 SV=1,>sp|P25705-2|ATPA_HUMAN Isoform 2 of ATP synthase subunit alpha, mitochondrial OS=Homo sapiens GN=ATP5A1,>tr|K7ERX7|K7ERX7_HUMAN ATP synthase subunit alpha, mitochondrial (Fragment) OS=Homo sapiens GN=ATP5A1 PE=1 SV=1,>tr|K7EK77|K7EK77_HUMAN ATP synthase subunit alpha, mitochondrial (Fragment) OS=H…	814.466	3.28933e-07	1.16979e-14	VGLKAPGIIPR	4	172	>sp|P25705|ATPA_HUMAN ATP synthase subunit alpha, mitochondrial OS=Homo sapiens GN=ATP5A1 PE=1 SV=1,>sp|P25705-2|ATPA_HUMAN Isoform 2 of ATP synthase subunit alpha, mitochondrial OS=Homo sapiens GN=ATP5A1,>sp|P25705-3|ATPA_HUMAN Isoform 3 of ATP synthase subunit alpha, mitochondrial OS=Homo sapiens GN=ATP5A1,>tr|K7ERX7|K7ERX7_HUMAN ATP synthase subunit alpha, mitochondrial (Fragment) OS=Homo sapi…	1119.71	0.000146734	2.65084e-14	>sp|P25705|ATPA_HUMAN ATP synthase subunit alpha, mitochondrial OS=Homo sapiens GN=ATP5A1 PE=1 SV=1,>sp|P25705-2|ATPA_HUMAN Isoform 2 of ATP synthase subunit alpha, mitochondrial OS=Homo sapiens GN=ATP5A1,>sp|P25705-3|ATPA_HUMAN Isoform 3 of ATP synthase subunit alpha, mitochondrial OS=Homo sapiens GN=ATP5A1,>tr|K7ERX7|K7ERX7_HUMAN ATP synthase subunit alpha, mitochondrial (Fragment) OS=Homo sapi…	ATP5A1	ATP5A1	>sp|P25705|ATPA_HUMAN ATP synthase subunit alpha, mitochondrial OS=Homo sapiens GN=ATP5A1 PE=1 SV=1	>sp|P25705|ATPA_HUMAN ATP synthase subunit alpha, mitochondrial OS=Homo sapiens GN=ATP5A1 PE=1 SV=1	167	175	1	sp|P25705|ATPA_HUMAN	sp|P25705|ATPA_HUMAN	ATP5A1_167	ATP5A1_175	GPIGSKTR	VGLKAPGIIPR	ATP5A1_167-ATP5A1_175	167	175
869-1-2-1-2-1	L1_20190826_HS_1023_FU_CL2_8.mgf	5590	5	2662.26	1	VLNKTMoDVSK	4	196	>tr|H0YMZ1|H0YMZ1_HUMAN Proteasome subunit alpha type (Fragment) OS=Homo sapiens GN=PSMA4 PE=1 SV=8,>tr|H0YL69|H0YL69_HUMAN Proteasome subunit alpha type (Fragment) OS=Homo sapiens GN=PSMA4 PE=1 SV=1,>sp|P25789|PSA4_HUMAN Proteasome subunit alpha type-4 OS=Homo sapiens GN=PSMA4 PE=1 SV=1,>tr|H0YMI6|H0YMI6_HUMAN Proteasome subunit alpha type (Fragment) OS=Homo sapiens GN=PSMA4 PE=1 SV=1,>tr|H0YMA1…	1149.61	1.57839e-15	3.37448e-24	KHEEEEAKAER	1	239	>sp|P25789|PSA4_HUMAN Proteasome subunit alpha type-4 OS=Homo sapiens GN=PSMA4 PE=1 SV=1,>tr|H0YN18|H0YN18_HUMAN Proteasome subunit alpha type-4 OS=Homo sapiens GN=PSMA4 PE=1 SV=1,>sp|P25789-2|PSA4_HUMAN Isoform 2 of Proteasome subunit alpha type-4 OS=Homo sapiens GN=PSMA4	1354.65	0.159761	8.8736e-22	>sp|P25789|PSA4_HUMAN Proteasome subunit alpha type-4 OS=Homo sapiens GN=PSMA4 PE=1 SV=1,>tr|H0YN18|H0YN18_HUMAN Proteasome subunit alpha type-4 OS=Homo sapiens GN=PSMA4 PE=1 SV=1,>sp|P25789-2|PSA4_HUMAN Isoform 2 of Proteasome subunit alpha type-4 OS=Homo sapiens GN=PSMA4-239->tr|H0YMZ1|H0YMZ1_HUMAN Proteasome subunit alpha type (Fragment) OS=Homo sapiens GN=PSMA4 PE=1 SV=8,>tr|H0YL69|H0YL69_HUM…	PSMA4	PSMA4	>tr|H0YMZ1|H0YMZ1_HUMAN Proteasome subunit alpha type (Fragment) OS=Homo sapiens GN=PSMA4 PE=1 SV=8	>sp|P25789|PSA4_HUMAN Proteasome subunit alpha type-4 OS=Homo sapiens GN=PSMA4 PE=1 SV=1	2	239	1	tr|H0YMZ1|H0YMZ1_HUMAN	sp|P25789|PSA4_HUMAN	PSMA4_2	PSMA4_239	VLNKTMoDVSK	KHEEEEAKAER	PSMA4_2-PSMA4_239	2	239
2817-1-1-1-5-1	L1_20190826_HS_1023_FU_CL2_7.mgf	11820	4	2578.18	2	FQTMoEEKK	7	379	>sp|P39023|RL3_HUMAN 60S ribosomal protein L3 OS=Homo sapiens GN=RPL3 PE=1 SV=2,>tr|G5E9G0|G5E9G0_HUMAN 60S ribosomal protein L3 OS=Homo sapiens GN=RPL3 PE=1 SV=1	1055.5	5.90443e-07	1.01182e-13	FIDTTSKFGHGR	7	367	>sp|P39023|RL3_HUMAN 60S ribosomal protein L3 OS=Homo sapiens GN=RPL3 PE=1 SV=2,>tr|G5E9G0|G5E9G0_HUMAN 60S ribosomal protein L3 OS=Homo sapiens GN=RPL3 PE=1 SV=1	1364.68	3.25042e-06	4.10948e-15	>sp|P39023|RL3_HUMAN 60S ribosomal protein L3 OS=Homo sapiens GN=RPL3 PE=1 SV=2,>tr|G5E9G0|G5E9G0_HUMAN 60S ribosomal protein L3 OS=Homo sapiens GN=RPL3 PE=1 SV=1-373->sp|P39023|RL3_HUMAN 60S ribosomal protein L3 OS=Homo sapiens GN=RPL3 PE=1 SV=2,>tr|G5E9G0|G5E9G0_HUMAN 60S ribosomal protein L3 OS=Homo sapiens GN=RPL3 PE=1 SV=1-385	RPL3	RPL3	>sp|P39023|RL3_HUMAN 60S ribosomal protein L3 OS=Homo sapiens GN=RPL3 PE=1 SV=2	>sp|P39023|RL3_HUMAN 60S ribosomal protein L3 OS=Homo sapiens GN=RPL3 PE=1 SV=2	373	5	1	sp|P39023|RL3_HUMAN	sp|P39023|RL3_HUMAN	RPL3_373	RPL3_5	FIDTTSKFGHGR	FQTMoEEKK	RPL3_373-RPL3_5	373	5
3023-1-4-1-8-1	L1_20190826_HS_1023_FU_CL2_4.mgf	14450	4	3148.6	4	IYKIGQGYLIK	3	284	>sp|P39023|RL3_HUMAN 60S ribosomal protein L3 OS=Homo sapiens GN=RPL3 PE=1 SV=2,>tr|G5E9G0|G5E9G0_HUMAN 60S ribosomal protein L3 OS=Homo sapiens GN=RPL3 PE=1 SV=1,>tr|B5MCW2|B5MCW2_HUMAN 60S ribosomal protein L3 (Fragment) OS=Homo sapiens GN=RPL3 PE=1 SV=1	1294.76	1.57591e-17	3.92203e-29	LIKNNASTDYDLSDK	3	298	>sp|P39023|RL3_HUMAN 60S ribosomal protein L3 OS=Homo sapiens GN=RPL3 PE=1 SV=2,>tr|G5E9G0|G5E9G0_HUMAN 60S ribosomal protein L3 OS=Homo sapiens GN=RPL3 PE=1 SV=1,>tr|B5MCW2|B5MCW2_HUMAN 60S ribosomal protein L3 (Fragment) OS=Homo sapiens GN=RPL3 PE=1 SV=1	1695.83	7.07457e-27	1.53383e-37	>sp|P39023|RL3_HUMAN 60S ribosomal protein L3 OS=Homo sapiens GN=RPL3 PE=1 SV=2,>tr|G5E9G0|G5E9G0_HUMAN 60S ribosomal protein L3 OS=Homo sapiens GN=RPL3 PE=1 SV=1,>tr|B5MCW2|B5MCW2_HUMAN 60S ribosomal protein L3 (Fragment) OS=Homo sapiens GN=RPL3 PE=1 SV=1-286->sp|P39023|RL3_HUMAN 60S ribosomal protein L3 OS=Homo sapiens GN=RPL3 PE=1 SV=2,>tr|G5E9G0|G5E9G0_HUMAN 60S ribosomal protein L3 OS=Homo s…	RPL3	RPL3	>sp|P39023|RL3_HUMAN 60S ribosomal protein L3 OS=Homo sapiens GN=RPL3 PE=1 SV=2	>sp|P39023|RL3_HUMAN 60S ribosomal protein L3 OS=Homo sapiens GN=RPL3 PE=1 SV=2	286	300	1	sp|P39023|RL3_HUMAN	sp|P39023|RL3_HUMAN	RPL3_286	RPL3_300	IYKIGQGYLIK	LIKNNASTDYDLSDK	RPL3_286-RPL3_300	286	300
2969-1-14-1-8-1	L1_20190826_HS_1023_FU_CL2_5.mgf	12883	4	3834.8	1	EVQTNDLKEVVNK	8	175	>sp|P61247|RS3A_HUMAN 40S ribosomal protein S3a OS=Homo sapiens GN=RPS3A PE=1 SV=2,>tr|E9PFI5|E9PFI5_HUMAN 40S ribosomal protein S3a OS=Homo sapiens GN=RPS3A PE=1 SV=1,>tr|D6RG13|D6RG13_HUMAN 40S ribosomal protein S3a (Fragment) OS=Homo sapiens GN=RPS3A PE=1 SV=1,>tr|D6RAT0|D6RAT0_HUMAN 40S ribosomal protein S3a OS=Homo sapiens GN=RPS3A PE=1 SV=1,>tr|D6RB09|D6RB09_HUMAN 40S ribosomal protein S3a …	1514.79	1.14086e-16	1.14086e-16	LMELHGEGSSSGKATGDETGAK	13	228	>sp|P61247|RS3A_HUMAN 40S ribosomal protein S3a OS=Homo sapiens GN=RPS3A PE=1 SV=2,>tr|D6RAT0|D6RAT0_HUMAN 40S ribosomal protein S3a OS=Homo sapiens GN=RPS3A PE=1 SV=1,>tr|H0Y9Y4|H0Y9Y4_HUMAN 40S ribosomal protein S3a (Fragment) OS=Homo sapiens GN=RPS3A PE=1 SV=1	2161	3.40105e-05	5.05976e-23	>sp|P61247|RS3A_HUMAN 40S ribosomal protein S3a OS=Homo sapiens GN=RPS3A PE=1 SV=2,>tr|D6RAT0|D6RAT0_HUMAN 40S ribosomal protein S3a OS=Homo sapiens GN=RPS3A PE=1 SV=1,>tr|H0Y9Y4|H0Y9Y4_HUMAN 40S ribosomal protein S3a (Fragment) OS=Homo sapiens GN=RPS3A PE=1 SV=1-240->sp|P61247|RS3A_HUMAN 40S ribosomal protein S3a OS=Homo sapiens GN=RPS3A PE=1 SV=2,>tr|E9PFI5|E9PFI5_HUMAN 40S ribosomal protein S3…	RPS3A	RPS3A	>sp|P61247|RS3A_HUMAN 40S ribosomal protein S3a OS=Homo sapiens GN=RPS3A PE=1 SV=2	>sp|P61247|RS3A_HUMAN 40S ribosomal protein S3a OS=Homo sapiens GN=RPS3A PE=1 SV=2	182	240	1	sp|P61247|RS3A_HUMAN	sp|P61247|RS3A_HUMAN	RPS3A_182	RPS3A_240	EVQTNDLKEVVNK	LMELHGEGSSSGKATGDETGAK	RPS3A_182-RPS3A_240	182	240
6258-1-14-1-23-1	L1_20190826_HS_1023_FU_CL2_6.mgf	22863	6	4530.31	1	YSVDIPLDKTVVNK	9	85	>sp|P61353|RL27_HUMAN 60S ribosomal protein L27 OS=Homo sapiens GN=RPL27 PE=1 SV=2,>tr|K7EQQ9|K7EQQ9_HUMAN 60S ribosomal protein L27 OS=Homo sapiens GN=RPL27 PE=1 SV=1,>tr|K7ELC7|K7ELC7_HUMAN 60S ribosomal protein L27 (Fragment) OS=Homo sapiens GN=RPL27 PE=1 SV=1	1589.87	2.87307e-14	2.21375e-25	AVIVKNIDDGTSDRPYSHALVAGIDR	5	23	>sp|P61353|RL27_HUMAN 60S ribosomal protein L27 OS=Homo sapiens GN=RPL27 PE=1 SV=2	2781.44	3.9312e-20	1.88257e-44	>sp|P61353|RL27_HUMAN 60S ribosomal protein L27 OS=Homo sapiens GN=RPL27 PE=1 SV=2-27->sp|P61353|RL27_HUMAN 60S ribosomal protein L27 OS=Homo sapiens GN=RPL27 PE=1 SV=2,>tr|K7EQQ9|K7EQQ9_HUMAN 60S ribosomal protein L27 OS=Homo sapiens GN=RPL27 PE=1 SV=1,>tr|K7ELC7|K7ELC7_HUMAN 60S ribosomal protein L27 (Fragment) OS=Homo sapiens GN=RPL27 PE=1 SV=1-93	RPL27	RPL27	>sp|P61353|RL27_HUMAN 60S ribosomal protein L27 OS=Homo sapiens GN=RPL27 PE=1 SV=2	>sp|P61353|RL27_HUMAN 60S ribosomal protein L27 OS=Homo sapiens GN=RPL27 PE=1 SV=2	27	93	1	sp|P61353|RL27_HUMAN	sp|P61353|RL27_HUMAN	RPL27_27	RPL27_93	AVIVKNIDDGTSDRPYSHALVAGIDR	YSVDIPLDKTVVNK	RPL27_27-RPL27_93	27	93
1750-1-3-1-27-1	L1_20190826_HS_1023_FU_CL2_7.mgf	8273	4	2513.24	1	QAQQAGK	7	98	>sp|P84090|ERH_HUMAN Enhancer of rudimentary homolog OS=Homo sapiens GN=ERH PE=1 SV=1	729.377	6.19845e-12	6.19845e-12	MoIASDSHRPEVKLK	12	535	>sp|Q9NYF8-2|BCLF1_HUMAN Isoform 2 of Bcl-2-associated transcription factor 1 OS=Homo sapiens GN=BCLAF1,>sp|Q9NYF8|BCLF1_HUMAN Bcl-2-associated transcription factor 1 OS=Homo sapiens GN=BCLAF1 PE=1 SV=2,>sp|Q9NYF8-4|BCLF1_HUMAN Isoform 4 of Bcl-2-associated transcription factor 1 OS=Homo sapiens GN=BCLAF1	1625.86	0.0237454	1.2915e-14	>sp|P84090|ERH_HUMAN Enhancer of rudimentary homolog OS=Homo sapiens GN=ERH PE=1 SV=1-104->sp|Q9NYF8-2|BCLF1_HUMAN Isoform 2 of Bcl-2-associated transcription factor 1 OS=Homo sapiens GN=BCLAF1,>sp|Q9NYF8|BCLF1_HUMAN Bcl-2-associated transcription factor 1 OS=Homo sapiens GN=BCLAF1 PE=1 SV=2,>sp|Q9NYF8-4|BCLF1_HUMAN Isoform 4 of Bcl-2-associated transcription factor 1 OS=Homo sapiens GN=BCLAF1-546	BCLAF1	ERH	>sp|Q9NYF8-2|BCLF1_HUMAN Isoform 2 of Bcl-2-associated transcription factor 1 OS=Homo sapiens GN=BCLAF1	>sp|P84090|ERH_HUMAN Enhancer of rudimentary homolog OS=Homo sapiens GN=ERH PE=1 SV=1	10	104	1	sp|Q9NYF8-2|BCLF1_HUMAN	sp|P84090|ERH_HUMAN	BCLAF1_10	ERH_104	MoIASDSHRPEVKLK	QAQQAGK	BCLAF1_10-ERH_104	10	104
5850-1-5-1-1-1	L1_20190826_HS_1023_FU_CL2_7.mgf	21297	5	3325.85	2	LLASTLVHSVKK	11	568	>sp|Q9NYF8-2|BCLF1_HUMAN Isoform 2 of Bcl-2-associated transcription factor 1 OS=Homo sapiens GN=BCLAF1,>sp|Q9NYF8|BCLF1_HUMAN Bcl-2-associated transcription factor 1 OS=Homo sapiens GN=BCLAF1 PE=1 SV=2,>sp|Q9NYF8-4|BCLF1_HUMAN Isoform 4 of Bcl-2-associated transcription factor 1 OS=Homo sapiens GN=BCLAF1	1294.8	7.75288e-05	6.38823e-17	SHTILLVQPTKRPEGR	11	2	>sp|P84090|ERH_HUMAN Enhancer of rudimentary homolog OS=Homo sapiens GN=ERH PE=1 SV=1,>tr|G3V279|G3V279_HUMAN Enhancer of rudimentary homolog OS=Homo sapiens GN=ERH PE=1 SV=1	1873.05	8.27762e-08	7.44571e-21	>sp|P84090|ERH_HUMAN Enhancer of rudimentary homolog OS=Homo sapiens GN=ERH PE=1 SV=1,>tr|G3V279|G3V279_HUMAN Enhancer of rudimentary homolog OS=Homo sapiens GN=ERH PE=1 SV=1-12->sp|Q9NYF8-2|BCLF1_HUMAN Isoform 2 of Bcl-2-associated transcription factor 1 OS=Homo sapiens GN=BCLAF1,>sp|Q9NYF8|BCLF1_HUMAN Bcl-2-associated transcription factor 1 OS=Homo sapiens GN=BCLAF1 PE=1 SV=2,>sp|Q9NYF8-4|BCLF1…	BCLAF1	ERH	>sp|Q9NYF8-2|BCLF1_HUMAN Isoform 2 of Bcl-2-associated transcription factor 1 OS=Homo sapiens GN=BCLAF1	>sp|P84090|ERH_HUMAN Enhancer of rudimentary homolog OS=Homo sapiens GN=ERH PE=1 SV=1	578	12	1	sp|Q9NYF8-2|BCLF1_HUMAN	sp|P84090|ERH_HUMAN	BCLAF1_578	ERH_12	LLASTLVHSVKK	SHTILLVQPTKRPEGR	BCLAF1_578-ERH_12	578	12
6906-1-8-1-1-1	L1_20190826_HS_1023_FU_CL2_7.mgf	24781	5	3513.87	3	SIFDHIKLPQASK	7	585	>sp|Q9NYF8-2|BCLF1_HUMAN Isoform 2 of Bcl-2-associated transcription factor 1 OS=Homo sapiens GN=BCLAF1,>sp|Q9NYF8|BCLF1_HUMAN Bcl-2-associated transcription factor 1 OS=Homo sapiens GN=BCLAF1 PE=1 SV=2,>sp|Q9NYF8-4|BCLF1_HUMAN Isoform 4 of Bcl-2-associated transcription factor 1 OS=Homo sapiens GN=BCLAF1	1482.82	9.90492e-07	2.05375e-20	SHTILLVQPTKRPEGR	11	2	>sp|P84090|ERH_HUMAN Enhancer of rudimentary homolog OS=Homo sapiens GN=ERH PE=1 SV=1,>tr|G3V279|G3V279_HUMAN Enhancer of rudimentary homolog OS=Homo sapiens GN=ERH PE=1 SV=1	1873.05	5.57844e-10	3.08265e-17	>sp|P84090|ERH_HUMAN Enhancer of rudimentary homolog OS=Homo sapiens GN=ERH PE=1 SV=1,>tr|G3V279|G3V279_HUMAN Enhancer of rudimentary homolog OS=Homo sapiens GN=ERH PE=1 SV=1-12->sp|Q9NYF8-2|BCLF1_HUMAN Isoform 2 of Bcl-2-associated transcription factor 1 OS=Homo sapiens GN=BCLAF1,>sp|Q9NYF8|BCLF1_HUMAN Bcl-2-associated transcription factor 1 OS=Homo sapiens GN=BCLAF1 PE=1 SV=2,>sp|Q9NYF8-4|BCLF1…	BCLAF1	ERH	>sp|Q9NYF8-2|BCLF1_HUMAN Isoform 2 of Bcl-2-associated transcription factor 1 OS=Homo sapiens GN=BCLAF1	>sp|P84090|ERH_HUMAN Enhancer of rudimentary homolog OS=Homo sapiens GN=ERH PE=1 SV=1	591	12	1	sp|Q9NYF8-2|BCLF1_HUMAN	sp|P84090|ERH_HUMAN	BCLAF1_591	ERH_12	SIFDHIKLPQASK	SHTILLVQPTKRPEGR	BCLAF1_591-ERH_12	591	12
3925-1-5-1-10-1	L1_20190826_HS_1023_FU_CL2_4.mgf	17228	4	2494.4	1	IDISNVKIPK	7	201	>sp|Q02878|RL6_HUMAN 60S ribosomal protein L6 OS=Homo sapiens GN=RPL6 PE=1 SV=3	1125.68	3.91562e-15	3.28076e-23	AVDSQILPKIK	9	252	>sp|Q02878|RL6_HUMAN 60S ribosomal protein L6 OS=Homo sapiens GN=RPL6 PE=1 SV=3	1210.73	3.08686e-21	8.69918e-33	>sp|Q02878|RL6_HUMAN 60S ribosomal protein L6 OS=Homo sapiens GN=RPL6 PE=1 SV=3-207->sp|Q02878|RL6_HUMAN 60S ribosomal protein L6 OS=Homo sapiens GN=RPL6 PE=1 SV=3-260	RPL6	RPL6	>sp|Q02878|RL6_HUMAN 60S ribosomal protein L6 OS=Homo sapiens GN=RPL6 PE=1 SV=3	>sp|Q02878|RL6_HUMAN 60S ribosomal protein L6 OS=Homo sapiens GN=RPL6 PE=1 SV=3	207	260	0	sp|Q02878|RL6_HUMAN	sp|Q02878|RL6_HUMAN	RPL6_207	RPL6_260	IDISNVKIPK	AVDSQILPKIK	RPL6_207-RPL6_260	207	260
2966-1-9-1-12-1	L1_20190826_HS_1023_FU_CL2_6.mgf	12304	5	4727.19	1	IGEKMETEADAPSPAPSLGER	4	1589	>sp|Q12873-2|CHD3_HUMAN Isoform 2 of Chromodomain-helicase-DNA-binding protein 3 OS=Homo sapiens GN=CHD3,>sp|Q12873|CHD3_HUMAN Chromodomain-helicase-DNA-binding protein 3 OS=Homo sapiens GN=CHD3 PE=1 SV=3,>sp|Q12873-3|CHD3_HUMAN Isoform 3 of Chromodomain-helicase-DNA-binding protein 3 OS=Homo sapiens GN=CHD3	2184.04	6.28098e-35	1.6536e-51	TPLEKEEAENQEEKPEKNSR	17	1569	>sp|Q12873-2|CHD3_HUMAN Isoform 2 of Chromodomain-helicase-DNA-binding protein 3 OS=Homo sapiens GN=CHD3,>sp|Q12873|CHD3_HUMAN Chromodomain-helicase-DNA-binding protein 3 OS=Homo sapiens GN=CHD3 PE=1 SV=3,>sp|Q12873-3|CHD3_HUMAN Isoform 3 of Chromodomain-helicase-DNA-binding protein 3 OS=Homo sapiens GN=CHD3	2384.15	0.0146444	1.07181e-26	>sp|Q12873-2|CHD3_HUMAN Isoform 2 of Chromodomain-helicase-DNA-binding protein 3 OS=Homo sapiens GN=CHD3,>sp|Q12873|CHD3_HUMAN Chromodomain-helicase-DNA-binding protein 3 OS=Homo sapiens GN=CHD3 PE=1 SV=3,>sp|Q12873-3|CHD3_HUMAN Isoform 3 of Chromodomain-helicase-DNA-binding protein 3 OS=Homo sapiens GN=CHD3-1585->sp|Q12873-2|CHD3_HUMAN Isoform 2 of Chromodomain-helicase-DNA-binding protein 3 OS=…	CHD3	CHD3	>sp|Q12873-2|CHD3_HUMAN Isoform 2 of Chromodomain-helicase-DNA-binding protein 3 OS=Homo sapiens GN=CHD3	>sp|Q12873-2|CHD3_HUMAN Isoform 2 of Chromodomain-helicase-DNA-binding protein 3 OS=Homo sapiens GN=CHD3	1585	1592	1	sp|Q12873-2|CHD3_HUMAN	sp|Q12873-2|CHD3_HUMAN	CHD3_1585	CHD3_1592	TPLEKEEAENQEEKPEKNSR	IGEKMETEADAPSPAPSLGER	CHD3_1585-CHD3_1592	1585	1592
2419-1-8-1-16-1	L1_20190826_HS_1023_FU_CL2_8.mgf	10716	5	3668.7	3	KDEDPENKIEFK	1	198	>sp|Q13123|RED_HUMAN Protein Red OS=Homo sapiens GN=IK PE=1 SV=3	1490.73	1.15912e-11	9.95367e-21	EKEEEELMoEKPQKETK	10	182	>sp|Q13123|RED_HUMAN Protein Red OS=Homo sapiens GN=IK PE=1 SV=3	2019.97	1	2.90714e-19	>sp|Q13123|RED_HUMAN Protein Red OS=Homo sapiens GN=IK PE=1 SV=3-191->sp|Q13123|RED_HUMAN Protein Red OS=Homo sapiens GN=IK PE=1 SV=3-198	IK	IK	>sp|Q13123|RED_HUMAN Protein Red OS=Homo sapiens GN=IK PE=1 SV=3	>sp|Q13123|RED_HUMAN Protein Red OS=Homo sapiens GN=IK PE=1 SV=3	191	198	0	sp|Q13123|RED_HUMAN	sp|Q13123|RED_HUMAN	IK_191	IK_198	EKEEEELMoEKPQKETK	KDEDPENKIEFK	IK_191-IK_198	191	198
4546-1-4-1-9-1	L1_20190826_HS_1023_FU_CL2_7.mgf	17281	4	2401.15	1	MLFKSK	4	219	>sp|Q13123|RED_HUMAN Protein Red OS=Homo sapiens GN=IK PE=1 SV=3	752.425	6.85016e-06	1.12513e-13	KDEDPENKIEFK	8	198	>sp|Q13123|RED_HUMAN Protein Red OS=Homo sapiens GN=IK PE=1 SV=3	1490.73	4.60399e-08	1.97307e-23	>sp|Q13123|RED_HUMAN Protein Red OS=Homo sapiens GN=IK PE=1 SV=3-205->sp|Q13123|RED_HUMAN Protein Red OS=Homo sapiens GN=IK PE=1 SV=3-222	IK	IK	>sp|Q13123|RED_HUMAN Protein Red OS=Homo sapiens GN=IK PE=1 SV=3	>sp|Q13123|RED_HUMAN Protein Red OS=Homo sapiens GN=IK PE=1 SV=3	205	222	0	sp|Q13123|RED_HUMAN	sp|Q13123|RED_HUMAN	IK_205	IK_222	KDEDPENKIEFK	MLFKSK	IK_205-IK_222	205	222
624-1-14-1-14-1	L1_20190826_HS_1023_FU_CL2_7.mgf	4600	4	2004.01	1	GVKEEVK	3	474	>sp|Q13547|HDAC1_HUMAN Histone deacetylase 1 OS=Homo sapiens GN=HDAC1 PE=1 SV=1	787.444	3.06189e-10	1.36944e-16	TKEEKPEAK	2	465	>sp|Q13547|HDAC1_HUMAN Histone deacetylase 1 OS=Homo sapiens GN=HDAC1 PE=1 SV=1	1058.56	1.75769e-09	1.50937e-18	>sp|Q13547|HDAC1_HUMAN Histone deacetylase 1 OS=Homo sapiens GN=HDAC1 PE=1 SV=1-466->sp|Q13547|HDAC1_HUMAN Histone deacetylase 1 OS=Homo sapiens GN=HDAC1 PE=1 SV=1-476	HDAC1	HDAC1	>sp|Q13547|HDAC1_HUMAN Histone deacetylase 1 OS=Homo sapiens GN=HDAC1 PE=1 SV=1	>sp|Q13547|HDAC1_HUMAN Histone deacetylase 1 OS=Homo sapiens GN=HDAC1 PE=1 SV=1	466	476	0	sp|Q13547|HDAC1_HUMAN	sp|Q13547|HDAC1_HUMAN	HDAC1_466	HDAC1_476	TKEEKPEAK	GVKEEVK	HDAC1_466-HDAC1_476	466	476
5955-2-7-1-2-1	L1_20190826_HS_1023_FU_CL2_7.mgf	21619	5	3542.87	1	LIKHAVQER	3	207	>sp|Q15029-2|U5S1_HUMAN Isoform 2 of 116 kDa U5 small nuclear ribonucleoprotein component OS=Homo sapiens GN=EFTUD2,>sp|Q15029-3|U5S1_HUMAN Isoform 3 of 116 kDa U5 small nuclear ribonucleoprotein component OS=Homo sapiens GN=EFTUD2,>sp|Q15029|U5S1_HUMAN 116 kDa U5 small nuclear ribonucleoprotein component OS=Homo sapiens GN=EFTUD2 PE=1 SV=1	1092.64	1	2.89773e-12	GNEEAQIFRPLKFNTTSVIK	12	535	>sp|Q15029-2|U5S1_HUMAN Isoform 2 of 116 kDa U5 small nuclear ribonucleoprotein component OS=Homo sapiens GN=EFTUD2,>sp|Q15029-3|U5S1_HUMAN Isoform 3 of 116 kDa U5 small nuclear ribonucleoprotein component OS=Homo sapiens GN=EFTUD2,>sp|Q15029|U5S1_HUMAN 116 kDa U5 small nuclear ribonucleoprotein component OS=Homo sapiens GN=EFTUD2 PE=1 SV=1	2291.23	7.29832e-14	1.25346e-29	>sp|Q15029-2|U5S1_HUMAN Isoform 2 of 116 kDa U5 small nuclear ribonucleoprotein component OS=Homo sapiens GN=EFTUD2,>sp|Q15029-3|U5S1_HUMAN Isoform 3 of 116 kDa U5 small nuclear ribonucleoprotein component OS=Homo sapiens GN=EFTUD2,>sp|Q15029|U5S1_HUMAN 116 kDa U5 small nuclear ribonucleoprotein component OS=Homo sapiens GN=EFTUD2 PE=1 SV=1-209->sp|Q15029-2|U5S1_HUMAN Isoform 2 of 116 kDa U5 smal…	EFTUD2	EFTUD2	>sp|Q15029-2|U5S1_HUMAN Isoform 2 of 116 kDa U5 small nuclear ribonucleoprotein component OS=Homo sapiens GN=EFTUD2	>sp|Q15029-2|U5S1_HUMAN Isoform 2 of 116 kDa U5 small nuclear ribonucleoprotein component OS=Homo sapiens GN=EFTUD2	209	546	1	sp|Q15029-2|U5S1_HUMAN	sp|Q15029-2|U5S1_HUMAN	EFTUD2_209	EFTUD2_546	LIKHAVQER	GNEEAQIFRPLKFNTTSVIK	EFTUD2_209-EFTUD2_546	209	546
4407-1-4-1-17-1	L1_20190826_HS_1023_FU_CL2_5.mgf	17354	4	2627.28	1	KAPTSSSQR	1	324	>sp|Q15029-2|U5S1_HUMAN Isoform 2 of 116 kDa U5 small nuclear ribonucleoprotein component OS=Homo sapiens GN=EFTUD2,>sp|Q15029-3|U5S1_HUMAN Isoform 3 of 116 kDa U5 small nuclear ribonucleoprotein component OS=Homo sapiens GN=EFTUD2,>sp|Q15029|U5S1_HUMAN 116 kDa U5 small nuclear ribonucleoprotein component OS=Homo sapiens GN=EFTUD2 PE=1 SV=1	960.499	1.98864e-10	5.99118e-22	LWGDIYFNPKTR	10	308	>sp|Q15029-2|U5S1_HUMAN Isoform 2 of 116 kDa U5 small nuclear ribonucleoprotein component OS=Homo sapiens GN=EFTUD2,>sp|Q15029-3|U5S1_HUMAN Isoform 3 of 116 kDa U5 small nuclear ribonucleoprotein component OS=Homo sapiens GN=EFTUD2,>sp|Q15029|U5S1_HUMAN 116 kDa U5 small nuclear ribonucleoprotein component OS=Homo sapiens GN=EFTUD2 PE=1 SV=1	1508.78	2.15923e-18	2.15923e-18	>sp|Q15029-2|U5S1_HUMAN Isoform 2 of 116 kDa U5 small nuclear ribonucleoprotein component OS=Homo sapiens GN=EFTUD2,>sp|Q15029-3|U5S1_HUMAN Isoform 3 of 116 kDa U5 small nuclear ribonucleoprotein component OS=Homo sapiens GN=EFTUD2,>sp|Q15029|U5S1_HUMAN 116 kDa U5 small nuclear ribonucleoprotein component OS=Homo sapiens GN=EFTUD2 PE=1 SV=1-317->sp|Q15029-2|U5S1_HUMAN Isoform 2 of 116 kDa U5 smal…	EFTUD2	EFTUD2	>sp|Q15029-2|U5S1_HUMAN Isoform 2 of 116 kDa U5 small nuclear ribonucleoprotein component OS=Homo sapiens GN=EFTUD2	>sp|Q15029-2|U5S1_HUMAN Isoform 2 of 116 kDa U5 small nuclear ribonucleoprotein component OS=Homo sapiens GN=EFTUD2	317	324	1	sp|Q15029-2|U5S1_HUMAN	sp|Q15029-2|U5S1_HUMAN	EFTUD2_317	EFTUD2_324	LWGDIYFNPKTR	KAPTSSSQR	EFTUD2_317-EFTUD2_324	317	324
6306-1-4-1-139-1	L1_20190826_HS_1023_FU_CL2_5.mgf	23681	4	4320.03	1	KAPTSSSQR	1	324	>sp|Q15029-2|U5S1_HUMAN Isoform 2 of 116 kDa U5 small nuclear ribonucleoprotein component OS=Homo sapiens GN=EFTUD2,>sp|Q15029-3|U5S1_HUMAN Isoform 3 of 116 kDa U5 small nuclear ribonucleoprotein component OS=Homo sapiens GN=EFTUD2,>sp|Q15029|U5S1_HUMAN 116 kDa U5 small nuclear ribonucleoprotein component OS=Homo sapiens GN=EFTUD2 PE=1 SV=1	960.499	3.84429e-07	2.45042e-13	HSVKSQEPLPDDDEEFELPEFVEPFLK	4	363	>sp|Q6P2Q9|PRP8_HUMAN Pre-mRNA-processing-splicing factor 8 OS=Homo sapiens GN=PRPF8 PE=1 SV=2	3199.52	6.87985e-20	6.87985e-20	>sp|Q15029-2|U5S1_HUMAN Isoform 2 of 116 kDa U5 small nuclear ribonucleoprotein component OS=Homo sapiens GN=EFTUD2,>sp|Q15029-3|U5S1_HUMAN Isoform 3 of 116 kDa U5 small nuclear ribonucleoprotein component OS=Homo sapiens GN=EFTUD2,>sp|Q15029|U5S1_HUMAN 116 kDa U5 small nuclear ribonucleoprotein component OS=Homo sapiens GN=EFTUD2 PE=1 SV=1-324->sp|Q6P2Q9|PRP8_HUMAN Pre-mRNA-processing-splicing f…	EFTUD2	PRPF8	>sp|Q15029-2|U5S1_HUMAN Isoform 2 of 116 kDa U5 small nuclear ribonucleoprotein component OS=Homo sapiens GN=EFTUD2	>sp|Q6P2Q9|PRP8_HUMAN Pre-mRNA-processing-splicing factor 8 OS=Homo sapiens GN=PRPF8 PE=1 SV=2	324	366	1	sp|Q15029-2|U5S1_HUMAN	sp|Q6P2Q9|PRP8_HUMAN	EFTUD2_324	PRPF8_366	KAPTSSSQR	HSVKSQEPLPDDDEEFELPEFVEPFLK	EFTUD2_324-PRPF8_366	324	366
3861-1-25-1-13-1	L1_20190826_HS_1023_FU_CL2_4.mgf	17038	4	2615.43	1	IFDLLPNKIR	8	1537	>sp|Q5VW36|FOCAD_HUMAN Focadhesin OS=Homo sapiens GN=FOCAD PE=1 SV=1	1227.73	4.51135e-13	4.51135e-13	IAQVTKSNIEK	6	1571	>sp|Q5VW36|FOCAD_HUMAN Focadhesin OS=Homo sapiens GN=FOCAD PE=1 SV=1	1229.7	8.36531e-15	9.55348e-23	>sp|Q5VW36|FOCAD_HUMAN Focadhesin OS=Homo sapiens GN=FOCAD PE=1 SV=1-1544->sp|Q5VW36|FOCAD_HUMAN Focadhesin OS=Homo sapiens GN=FOCAD PE=1 SV=1-1576	FOCAD	FOCAD	>sp|Q5VW36|FOCAD_HUMAN Focadhesin OS=Homo sapiens GN=FOCAD PE=1 SV=1	>sp|Q5VW36|FOCAD_HUMAN Focadhesin OS=Homo sapiens GN=FOCAD PE=1 SV=1	1544	1576	0	sp|Q5VW36|FOCAD_HUMAN	sp|Q5VW36|FOCAD_HUMAN	FOCAD_1544	FOCAD_1576	IFDLLPNKIR	IAQVTKSNIEK	FOCAD_1544-FOCAD_1576	1544	1576
2880-1-17-1-13-1	L1_20190826_HS_1023_FU_CL2_7.mgf	12027	4	3174.54	1	LSAQDSQKNVAVR	8	513	>sp|Q68DQ2|CRBG3_HUMAN Very large A-kinase anchor protein OS=Homo sapiens GN=CRYBG3 PE=1 SV=3	1414.75	3.8013e-22	9.30205e-30	HAVTDTEFVNEGKR	13	499	>sp|Q68DQ2|CRBG3_HUMAN Very large A-kinase anchor protein OS=Homo sapiens GN=CRYBG3 PE=1 SV=3	1601.78	6.95372e-11	4.70621e-21	>sp|Q68DQ2|CRBG3_HUMAN Very large A-kinase anchor protein OS=Homo sapiens GN=CRYBG3 PE=1 SV=3-511->sp|Q68DQ2|CRBG3_HUMAN Very large A-kinase anchor protein OS=Homo sapiens GN=CRYBG3 PE=1 SV=3-520	CRYBG3	CRYBG3	>sp|Q68DQ2|CRBG3_HUMAN Very large A-kinase anchor protein OS=Homo sapiens GN=CRYBG3 PE=1 SV=3	>sp|Q68DQ2|CRBG3_HUMAN Very large A-kinase anchor protein OS=Homo sapiens GN=CRYBG3 PE=1 SV=3	511	520	0	sp|Q68DQ2|CRBG3_HUMAN	sp|Q68DQ2|CRBG3_HUMAN	CRYBG3_511	CRYBG3_520	HAVTDTEFVNEGKR	LSAQDSQKNVAVR	CRYBG3_511-CRYBG3_520	511	520
2061-1-2-1-22-1	L1_20190826_HS_1023_FU_CL2_5.mgf	9567	4	2242.12	1	ANPKEVGPR	4	66	>tr|A2A2Q9|A2A2Q9_HUMAN Protein AAR2 homolog OS=Homo sapiens GN=AAR2 PE=1 SV=1,>sp|Q9Y312|AAR2_HUMAN Protein AAR2 homolog OS=Homo sapiens GN=AAR2 PE=1 SV=2	966.525	1.62659e-11	3.07822e-18	IGLNSKMoPSR	6	1301	>sp|Q6P2Q9|PRP8_HUMAN Pre-mRNA-processing-splicing factor 8 OS=Homo sapiens GN=PRPF8 PE=1 SV=2	1117.59	6.33714e-05	9.06691e-14	>sp|Q6P2Q9|PRP8_HUMAN Pre-mRNA-processing-splicing factor 8 OS=Homo sapiens GN=PRPF8 PE=1 SV=2-1306->tr|A2A2Q9|A2A2Q9_HUMAN Protein AAR2 homolog OS=Homo sapiens GN=AAR2 PE=1 SV=1,>sp|Q9Y312|AAR2_HUMAN Protein AAR2 homolog OS=Homo sapiens GN=AAR2 PE=1 SV=2-69	AAR2	PRPF8	>tr|A2A2Q9|A2A2Q9_HUMAN Protein AAR2 homolog OS=Homo sapiens GN=AAR2 PE=1 SV=1	>sp|Q6P2Q9|PRP8_HUMAN Pre-mRNA-processing-splicing factor 8 OS=Homo sapiens GN=PRPF8 PE=1 SV=2	69	1306	1	tr|A2A2Q9|A2A2Q9_HUMAN	sp|Q6P2Q9|PRP8_HUMAN	AAR2_69	PRPF8_1306	ANPKEVGPR	IGLNSKMoPSR	AAR2_69-PRPF8_1306	69	1306
3816-1-5-1-13-1	L1_20190826_HS_1023_FU_CL2_4.mgf	16900	4	2130.2	1	VILKPDK	4	1952	>sp|Q6P2Q9|PRP8_HUMAN Pre-mRNA-processing-splicing factor 8 OS=Homo sapiens GN=PRPF8 PE=1 SV=2	811.517	4.85075e-10	4.80835e-19	VEKFGDLILK	3	1899	>sp|Q6P2Q9|PRP8_HUMAN Pre-mRNA-processing-splicing factor 8 OS=Homo sapiens GN=PRPF8 PE=1 SV=2	1160.68	2.88625e-15	4.94943e-25	>sp|Q6P2Q9|PRP8_HUMAN Pre-mRNA-processing-splicing factor 8 OS=Homo sapiens GN=PRPF8 PE=1 SV=2-1901->sp|Q6P2Q9|PRP8_HUMAN Pre-mRNA-processing-splicing factor 8 OS=Homo sapiens GN=PRPF8 PE=1 SV=2-1955	PRPF8	PRPF8	>sp|Q6P2Q9|PRP8_HUMAN Pre-mRNA-processing-splicing factor 8 OS=Homo sapiens GN=PRPF8 PE=1 SV=2	>sp|Q6P2Q9|PRP8_HUMAN Pre-mRNA-processing-splicing factor 8 OS=Homo sapiens GN=PRPF8 PE=1 SV=2	1901	1955	0	sp|Q6P2Q9|PRP8_HUMAN	sp|Q6P2Q9|PRP8_HUMAN	PRPF8_1901	PRPF8_1955	VEKFGDLILK	VILKPDK	PRPF8_1901-PRPF8_1955	1901	1955
2815-1-22-1-147-1	L1_20190826_HS_1023_FU_CL2_5.mgf	12366	4	4566.16	1	QTKEQSQLTATQTR	3	2032	>sp|Q6P2Q9|PRP8_HUMAN Pre-mRNA-processing-splicing factor 8 OS=Homo sapiens GN=PRPF8 PE=1 SV=2	1618.83	3.92303e-14	3.92303e-14	TVNKHGDEIITSTTSNYETQTFSSK	4	2046	>sp|Q6P2Q9|PRP8_HUMAN Pre-mRNA-processing-splicing factor 8 OS=Homo sapiens GN=PRPF8 PE=1 SV=2	2787.32	4.93529e-18	2.65679e-32	>sp|Q6P2Q9|PRP8_HUMAN Pre-mRNA-processing-splicing factor 8 OS=Homo sapiens GN=PRPF8 PE=1 SV=2-2034->sp|Q6P2Q9|PRP8_HUMAN Pre-mRNA-processing-splicing factor 8 OS=Homo sapiens GN=PRPF8 PE=1 SV=2-2049	PRPF8	PRPF8	>sp|Q6P2Q9|PRP8_HUMAN Pre-mRNA-processing-splicing factor 8 OS=Homo sapiens GN=PRPF8 PE=1 SV=2	>sp|Q6P2Q9|PRP8_HUMAN Pre-mRNA-processing-splicing factor 8 OS=Homo sapiens GN=PRPF8 PE=1 SV=2	2034	2049	0	sp|Q6P2Q9|PRP8_HUMAN	sp|Q6P2Q9|PRP8_HUMAN	PRPF8_2034	PRPF8_2049	QTKEQSQLTATQTR	TVNKHGDEIITSTTSNYETQTFSSK	PRPF8_2034-PRPF8_2049	2034	2049
2883-1-4-1-7-1	L1_20190826_HS_1023_FU_CL2_7.mgf	12034	5	2949.34	1	KMoLEDPQER	1	204	>sp|Q9BUQ8|DDX23_HUMAN Probable ATP-dependent RNA helicase DDX23 OS=Homo sapiens GN=DDX23 PE=1 SV=3	1160.55	8.02953e-13	8.02953e-13	GNNPKGYLPSHYER	5	2245	>sp|Q6P2Q9|PRP8_HUMAN Pre-mRNA-processing-splicing factor 8 OS=Homo sapiens GN=PRPF8 PE=1 SV=2	1630.79	1.61378e-11	8.86887e-24	>sp|Q6P2Q9|PRP8_HUMAN Pre-mRNA-processing-splicing factor 8 OS=Homo sapiens GN=PRPF8 PE=1 SV=2-2249->sp|Q9BUQ8|DDX23_HUMAN Probable ATP-dependent RNA helicase DDX23 OS=Homo sapiens GN=DDX23 PE=1 SV=3-204	DDX23	PRPF8	>sp|Q9BUQ8|DDX23_HUMAN Probable ATP-dependent RNA helicase DDX23 OS=Homo sapiens GN=DDX23 PE=1 SV=3	>sp|Q6P2Q9|PRP8_HUMAN Pre-mRNA-processing-splicing factor 8 OS=Homo sapiens GN=PRPF8 PE=1 SV=2	204	2249	0	sp|Q9BUQ8|DDX23_HUMAN	sp|Q6P2Q9|PRP8_HUMAN	DDX23_204	PRPF8_2249	KMoLEDPQER	GNNPKGYLPSHYER	DDX23_204-PRPF8_2249	204	2249
2574-1-3-1-24-1	L1_20190826_HS_1023_FU_CL2_3.mgf	14749	4	2960.59	1	VSYQKLLK	5	445	>sp|Q6P2Q9|PRP8_HUMAN Pre-mRNA-processing-splicing factor 8 OS=Homo sapiens GN=PRPF8 PE=1 SV=2	977.591	4.60495e-06	2.40235e-13	ALNMoAIPGGPKFEPLVR	11	268	>sp|Q6P2Q9|PRP8_HUMAN Pre-mRNA-processing-splicing factor 8 OS=Homo sapiens GN=PRPF8 PE=1 SV=2	1824.99	2.37134e-33	2.37134e-33	>sp|Q6P2Q9|PRP8_HUMAN Pre-mRNA-processing-splicing factor 8 OS=Homo sapiens GN=PRPF8 PE=1 SV=2-278->sp|Q6P2Q9|PRP8_HUMAN Pre-mRNA-processing-splicing factor 8 OS=Homo sapiens GN=PRPF8 PE=1 SV=2-449	PRPF8	PRPF8	>sp|Q6P2Q9|PRP8_HUMAN Pre-mRNA-processing-splicing factor 8 OS=Homo sapiens GN=PRPF8 PE=1 SV=2	>sp|Q6P2Q9|PRP8_HUMAN Pre-mRNA-processing-splicing factor 8 OS=Homo sapiens GN=PRPF8 PE=1 SV=2	278	449	0	sp|Q6P2Q9|PRP8_HUMAN	sp|Q6P2Q9|PRP8_HUMAN	PRPF8_278	PRPF8_449	ALNMoAIPGGPKFEPLVR	VSYQKLLK	PRPF8_278-PRPF8_449	278	449
2765-1-7-1-27-1	L1_20190826_HS_1023_FU_CL2_3.mgf	15345	4	3848.91	1	KWQQLQAK	1	36	>sp|Q6P2Q9|PRP8_HUMAN Pre-mRNA-processing-splicing factor 8 OS=Homo sapiens GN=PRPF8 PE=1 SV=2	1028.58	1.34036e-06	7.33137e-14	GPGNPVPGPLAPLPDYMSEEKLQEK	21	9	>sp|Q6P2Q9|PRP8_HUMAN Pre-mRNA-processing-splicing factor 8 OS=Homo sapiens GN=PRPF8 PE=1 SV=2	2662.33	1.02372e-21	2.17545e-35	>sp|Q6P2Q9|PRP8_HUMAN Pre-mRNA-processing-splicing factor 8 OS=Homo sapiens GN=PRPF8 PE=1 SV=2-29->sp|Q6P2Q9|PRP8_HUMAN Pre-mRNA-processing-splicing factor 8 OS=Homo sapiens GN=PRPF8 PE=1 SV=2-36	PRPF8	PRPF8	>sp|Q6P2Q9|PRP8_HUMAN Pre-mRNA-processing-splicing factor 8 OS=Homo sapiens GN=PRPF8 PE=1 SV=2	>sp|Q6P2Q9|PRP8_HUMAN Pre-mRNA-processing-splicing factor 8 OS=Homo sapiens GN=PRPF8 PE=1 SV=2	29	36	0	sp|Q6P2Q9|PRP8_HUMAN	sp|Q6P2Q9|PRP8_HUMAN	PRPF8_29	PRPF8_36	GPGNPVPGPLAPLPDYMSEEKLQEK	KWQQLQAK	PRPF8_29-PRPF8_36	29	36
6294-1-18-1-30-1	L1_20190826_HS_1023_FU_CL2_8.mgf	22945	8	5259.54	1	KFGFVDAQKEDMoPPEHVR	1	50	>sp|Q6P2Q9|PRP8_HUMAN Pre-mRNA-processing-splicing factor 8 OS=Homo sapiens GN=PRPF8 PE=1 SV=2	2145.03	1	6.26855e-14	LPGHAGSINEVAFHPDEPIIISASSDKR	27	323	>sp|Q96DI7|SNR40_HUMAN U5 small nuclear ribonucleoprotein 40 kDa protein OS=Homo sapiens GN=SNRNP40 PE=1 SV=1	2956.5	1.30535e-37	2.43675e-58	>sp|Q6P2Q9|PRP8_HUMAN Pre-mRNA-processing-splicing factor 8 OS=Homo sapiens GN=PRPF8 PE=1 SV=2-50->sp|Q96DI7|SNR40_HUMAN U5 small nuclear ribonucleoprotein 40 kDa protein OS=Homo sapiens GN=SNRNP40 PE=1 SV=1-349	PRPF8	SNRNP40	>sp|Q6P2Q9|PRP8_HUMAN Pre-mRNA-processing-splicing factor 8 OS=Homo sapiens GN=PRPF8 PE=1 SV=2	>sp|Q96DI7|SNR40_HUMAN U5 small nuclear ribonucleoprotein 40 kDa protein OS=Homo sapiens GN=SNRNP40 PE=1 SV=1	50	349	0	sp|Q6P2Q9|PRP8_HUMAN	sp|Q96DI7|SNR40_HUMAN	PRPF8_50	SNRNP40_349	KFGFVDAQKEDMoPPEHVR	LPGHAGSINEVAFHPDEPIIISASSDKR	PRPF8_50-SNRNP40_349	50	349
4011-1-3-1-12-1	L1_20190826_HS_1023_FU_CL2_6.mgf	15697	5	2574.38	1	KKPPGSLLPK	2	71	>sp|Q709F0|ACD11_HUMAN Acyl-CoA dehydrogenase family member 11 OS=Homo sapiens GN=ACAD11 PE=1 SV=2,>sp|Q709F0-2|ACD11_HUMAN Isoform 2 of Acyl-CoA dehydrogenase family member 11 OS=Homo sapiens GN=ACAD11,>tr|D6RDI8|D6RDI8_HUMAN Acyl-CoA dehydrogenase family member 11 OS=Homo sapiens GN=ACAD11 PE=1 SV=2,>tr|F8WEV0|F8WEV0_HUMAN Acyl-CoA dehydrogenase family member 11 OS=Homo sapiens GN=ACAD11 PE=1 S…	1063.68	1	2.34561e-13	AGKSNPTFYLQK	3	51	>sp|Q709F0|ACD11_HUMAN Acyl-CoA dehydrogenase family member 11 OS=Homo sapiens GN=ACAD11 PE=1 SV=2,>sp|Q709F0-2|ACD11_HUMAN Isoform 2 of Acyl-CoA dehydrogenase family member 11 OS=Homo sapiens GN=ACAD11,>tr|D6RDI8|D6RDI8_HUMAN Acyl-CoA dehydrogenase family member 11 OS=Homo sapiens GN=ACAD11 PE=1 SV=2,>tr|F8WEV0|F8WEV0_HUMAN Acyl-CoA dehydrogenase family member 11 OS=Homo sapiens GN=ACAD11 PE=1 S…	1352.71	2.08935e-16	2.08935e-16	>sp|Q709F0|ACD11_HUMAN Acyl-CoA dehydrogenase family member 11 OS=Homo sapiens GN=ACAD11 PE=1 SV=2,>sp|Q709F0-2|ACD11_HUMAN Isoform 2 of Acyl-CoA dehydrogenase family member 11 OS=Homo sapiens GN=ACAD11,>tr|D6RDI8|D6RDI8_HUMAN Acyl-CoA dehydrogenase family member 11 OS=Homo sapiens GN=ACAD11 PE=1 SV=2,>tr|F8WEV0|F8WEV0_HUMAN Acyl-CoA dehydrogenase family member 11 OS=Homo sapiens GN=ACAD11 PE=1 S…	ACAD11	ACAD11	>sp|Q709F0|ACD11_HUMAN Acyl-CoA dehydrogenase family member 11 OS=Homo sapiens GN=ACAD11 PE=1 SV=2	>sp|Q709F0|ACD11_HUMAN Acyl-CoA dehydrogenase family member 11 OS=Homo sapiens GN=ACAD11 PE=1 SV=2	53	72	1	sp|Q709F0|ACD11_HUMAN	sp|Q709F0|ACD11_HUMAN	ACAD11_53	ACAD11_72	AGKSNPTFYLQK	KKPPGSLLPK	ACAD11_53-ACAD11_72	53	72
292-1-13-1-2-1	L1_20190826_HS_1023_FU_CL2_4.mgf	4257	4	2730.22	1	AVNKASSTTPK	4	1240	>sp|Q8NI27|THOC2_HUMAN THO complex subunit 2 OS=Homo sapiens GN=THOC2 PE=1 SV=2,>tr|A0A0C4DG98|A0A0C4DG98_HUMAN THO complex subunit 2 OS=Homo sapiens GN=THOC2 PE=1 SV=1	1102.6	3.06087e-11	3.06087e-11	SDESSTEETDKSR	11	1219	>sp|Q8NI27|THOC2_HUMAN THO complex subunit 2 OS=Homo sapiens GN=THOC2 PE=1 SV=2,>tr|A0A0C4DG98|A0A0C4DG98_HUMAN THO complex subunit 2 OS=Homo sapiens GN=THOC2 PE=1 SV=1	1469.61	2.25812e-21	3.88438e-32	>sp|Q8NI27|THOC2_HUMAN THO complex subunit 2 OS=Homo sapiens GN=THOC2 PE=1 SV=2,>tr|A0A0C4DG98|A0A0C4DG98_HUMAN THO complex subunit 2 OS=Homo sapiens GN=THOC2 PE=1 SV=1-1229->sp|Q8NI27|THOC2_HUMAN THO complex subunit 2 OS=Homo sapiens GN=THOC2 PE=1 SV=2,>tr|A0A0C4DG98|A0A0C4DG98_HUMAN THO complex subunit 2 OS=Homo sapiens GN=THOC2 PE=1 SV=1-1243	THOC2	THOC2	>sp|Q8NI27|THOC2_HUMAN THO complex subunit 2 OS=Homo sapiens GN=THOC2 PE=1 SV=2	>sp|Q8NI27|THOC2_HUMAN THO complex subunit 2 OS=Homo sapiens GN=THOC2 PE=1 SV=2	1229	1243	1	sp|Q8NI27|THOC2_HUMAN	sp|Q8NI27|THOC2_HUMAN	THOC2_1229	THOC2_1243	SDESSTEETDKSR	AVNKASSTTPK	THOC2_1229-THOC2_1243	1229	1243
3491-1-10-1-10-1	L1_20190826_HS_1023_FU_CL2_7.mgf	14008	5	2886.44	2	GSPVNALQNKR	10	406	>sp|Q8NI27|THOC2_HUMAN THO complex subunit 2 OS=Homo sapiens GN=THOC2 PE=1 SV=2,>tr|A0A0C4DG98|A0A0C4DG98_HUMAN THO complex subunit 2 OS=Homo sapiens GN=THOC2 PE=1 SV=1	1182.65	3.64298e-07	9.36512e-16	APKQAESFEDLRR	3	417	>sp|Q8NI27|THOC2_HUMAN THO complex subunit 2 OS=Homo sapiens GN=THOC2 PE=1 SV=2,>tr|A0A0C4DG98|A0A0C4DG98_HUMAN THO complex subunit 2 OS=Homo sapiens GN=THOC2 PE=1 SV=1	1545.79	1	4.64728e-19	>sp|Q8NI27|THOC2_HUMAN THO complex subunit 2 OS=Homo sapiens GN=THOC2 PE=1 SV=2,>tr|A0A0C4DG98|A0A0C4DG98_HUMAN THO complex subunit 2 OS=Homo sapiens GN=THOC2 PE=1 SV=1-415->sp|Q8NI27|THOC2_HUMAN THO complex subunit 2 OS=Homo sapiens GN=THOC2 PE=1 SV=2,>tr|A0A0C4DG98|A0A0C4DG98_HUMAN THO complex subunit 2 OS=Homo sapiens GN=THOC2 PE=1 SV=1-419	THOC2	THOC2	>sp|Q8NI27|THOC2_HUMAN THO complex subunit 2 OS=Homo sapiens GN=THOC2 PE=1 SV=2	>sp|Q8NI27|THOC2_HUMAN THO complex subunit 2 OS=Homo sapiens GN=THOC2 PE=1 SV=2	415	419	1	sp|Q8NI27|THOC2_HUMAN	sp|Q8NI27|THOC2_HUMAN	THOC2_415	THOC2_419	GSPVNALQNKR	APKQAESFEDLRR	THOC2_415-THOC2_419	415	419
1708-1-9-1-3-1	L1_20190826_HS_1023_FU_CL2_5.mgf	8357	4	2367.12	1	STKIYTPGR	3	1201	>sp|Q92620|PRP16_HUMAN Pre-mRNA-splicing factor ATP-dependent RNA helicase PRP16 OS=Homo sapiens GN=DHX38 PE=1 SV=2	1021.56	1.42012e-08	4.06478e-15	KEQGEPMoTPR	1	1210	>sp|Q92620|PRP16_HUMAN Pre-mRNA-splicing factor ATP-dependent RNA helicase PRP16 OS=Homo sapiens GN=DHX38 PE=1 SV=2	1187.56	6.8822e-16	3.268e-27	>sp|Q92620|PRP16_HUMAN Pre-mRNA-splicing factor ATP-dependent RNA helicase PRP16 OS=Homo sapiens GN=DHX38 PE=1 SV=2-1203->sp|Q92620|PRP16_HUMAN Pre-mRNA-splicing factor ATP-dependent RNA helicase PRP16 OS=Homo sapiens GN=DHX38 PE=1 SV=2-1210	DHX38	DHX38	>sp|Q92620|PRP16_HUMAN Pre-mRNA-splicing factor ATP-dependent RNA helicase PRP16 OS=Homo sapiens GN=DHX38 PE=1 SV=2	>sp|Q92620|PRP16_HUMAN Pre-mRNA-splicing factor ATP-dependent RNA helicase PRP16 OS=Homo sapiens GN=DHX38 PE=1 SV=2	1203	1210	0	sp|Q92620|PRP16_HUMAN	sp|Q92620|PRP16_HUMAN	DHX38_1203	DHX38_1210	STKIYTPGR	KEQGEPMoTPR	DHX38_1203-DHX38_1210	1203	1210
194-2-16-1-2-1	L1_20190826_HS_1023_FU_CL2_8.mgf	3423	5	3456.6	1	IEEDKKETEDKK	11	417	>sp|Q92769-3|HDAC2_HUMAN Isoform 2 of Histone deacetylase 2 OS=Homo sapiens GN=HDAC2,>sp|Q92769|HDAC2_HUMAN Histone deacetylase 2 OS=Homo sapiens GN=HDAC2 PE=1 SV=2	1490.75	1	8.23382e-13	TDVKEEDKSKDNSGEK	4	429	>sp|Q92769-3|HDAC2_HUMAN Isoform 2 of Histone deacetylase 2 OS=Homo sapiens GN=HDAC2,>sp|Q92769|HDAC2_HUMAN Histone deacetylase 2 OS=Homo sapiens GN=HDAC2 PE=1 SV=2	1807.84	1	5.35877e-18	>sp|Q92769-3|HDAC2_HUMAN Isoform 2 of Histone deacetylase 2 OS=Homo sapiens GN=HDAC2,>sp|Q92769|HDAC2_HUMAN Histone deacetylase 2 OS=Homo sapiens GN=HDAC2 PE=1 SV=2-427->sp|Q92769-3|HDAC2_HUMAN Isoform 2 of Histone deacetylase 2 OS=Homo sapiens GN=HDAC2,>sp|Q92769|HDAC2_HUMAN Histone deacetylase 2 OS=Homo sapiens GN=HDAC2 PE=1 SV=2-432	HDAC2	HDAC2	>sp|Q92769-3|HDAC2_HUMAN Isoform 2 of Histone deacetylase 2 OS=Homo sapiens GN=HDAC2	>sp|Q92769-3|HDAC2_HUMAN Isoform 2 of Histone deacetylase 2 OS=Homo sapiens GN=HDAC2	427	432	1	sp|Q92769-3|HDAC2_HUMAN	sp|Q92769-3|HDAC2_HUMAN	HDAC2_427	HDAC2_432	IEEDKKETEDKK	TDVKEEDKSKDNSGEK	HDAC2_427-HDAC2_432	427	432
6391-1-9-1-100-1	L1_20190826_HS_1023_FU_CL2_8.mgf	23246	6	3376.65	1	VWDVRPFAPKER	10	261	>sp|Q96DI7|SNR40_HUMAN U5 small nuclear ribonucleoprotein 40 kDa protein OS=Homo sapiens GN=SNRNP40 PE=1 SV=1,>sp|Q96DI7-2|SNR40_HUMAN Isoform 2 of U5 small nuclear ribonucleoprotein 40 kDa protein OS=Homo sapiens GN=SNRNP40	1498.8	7.44367e-07	7.81568e-22	CVKIFQGNVHNFEK	3	273	>sp|Q96DI7|SNR40_HUMAN U5 small nuclear ribonucleoprotein 40 kDa protein OS=Homo sapiens GN=SNRNP40 PE=1 SV=1,>sp|Q96DI7-2|SNR40_HUMAN Isoform 2 of U5 small nuclear ribonucleoprotein 40 kDa protein OS=Homo sapiens GN=SNRNP40	1718.86	2.4051e-12	1.95687e-31	>sp|Q96DI7|SNR40_HUMAN U5 small nuclear ribonucleoprotein 40 kDa protein OS=Homo sapiens GN=SNRNP40 PE=1 SV=1,>sp|Q96DI7-2|SNR40_HUMAN Isoform 2 of U5 small nuclear ribonucleoprotein 40 kDa protein OS=Homo sapiens GN=SNRNP40-270->sp|Q96DI7|SNR40_HUMAN U5 small nuclear ribonucleoprotein 40 kDa protein OS=Homo sapiens GN=SNRNP40 PE=1 SV=1,>sp|Q96DI7-2|SNR40_HUMAN Isoform 2 of U5 small nuclear ribon…	SNRNP40	SNRNP40	>sp|Q96DI7|SNR40_HUMAN U5 small nuclear ribonucleoprotein 40 kDa protein OS=Homo sapiens GN=SNRNP40 PE=1 SV=1	>sp|Q96DI7|SNR40_HUMAN U5 small nuclear ribonucleoprotein 40 kDa protein OS=Homo sapiens GN=SNRNP40 PE=1 SV=1	270	275	1	sp|Q96DI7|SNR40_HUMAN	sp|Q96DI7|SNR40_HUMAN	SNRNP40_270	SNRNP40_275	VWDVRPFAPKER	CVKIFQGNVHNFEK	SNRNP40_270-SNRNP40_275	270	275
6311-1-7-1-98-1	L1_20190826_HS_1023_FU_CL2_7.mgf	22717	5	3209.67	1	KGPELPLVPVKR	1	8	>sp|Q96DI7|SNR40_HUMAN U5 small nuclear ribonucleoprotein 40 kDa protein OS=Homo sapiens GN=SNRNP40 PE=1 SV=1,>sp|Q96DI7-2|SNR40_HUMAN Isoform 2 of U5 small nuclear ribonucleoprotein 40 kDa protein OS=Homo sapiens GN=SNRNP40	1331.83	5.49839e-05	6.34235e-13	CVKIFQGNVHNFEK	3	273	>sp|Q96DI7|SNR40_HUMAN U5 small nuclear ribonucleoprotein 40 kDa protein OS=Homo sapiens GN=SNRNP40 PE=1 SV=1,>sp|Q96DI7-2|SNR40_HUMAN Isoform 2 of U5 small nuclear ribonucleoprotein 40 kDa protein OS=Homo sapiens GN=SNRNP40	1718.86	1.66909e-06	4.90185e-26	>sp|Q96DI7|SNR40_HUMAN U5 small nuclear ribonucleoprotein 40 kDa protein OS=Homo sapiens GN=SNRNP40 PE=1 SV=1,>sp|Q96DI7-2|SNR40_HUMAN Isoform 2 of U5 small nuclear ribonucleoprotein 40 kDa protein OS=Homo sapiens GN=SNRNP40-275->sp|Q96DI7|SNR40_HUMAN U5 small nuclear ribonucleoprotein 40 kDa protein OS=Homo sapiens GN=SNRNP40 PE=1 SV=1,>sp|Q96DI7-2|SNR40_HUMAN Isoform 2 of U5 small nuclear ribon…	SNRNP40	SNRNP40	>sp|Q96DI7|SNR40_HUMAN U5 small nuclear ribonucleoprotein 40 kDa protein OS=Homo sapiens GN=SNRNP40 PE=1 SV=1	>sp|Q96DI7|SNR40_HUMAN U5 small nuclear ribonucleoprotein 40 kDa protein OS=Homo sapiens GN=SNRNP40 PE=1 SV=1	275	8	1	sp|Q96DI7|SNR40_HUMAN	sp|Q96DI7|SNR40_HUMAN	SNRNP40_275	SNRNP40_8	CVKIFQGNVHNFEK	KGPELPLVPVKR	SNRNP40_275-SNRNP40_8	275	8
2332-1-11-1-4-1	L1_20190826_HS_1023_FU_CL2_5.mgf	10504	4	2309.07	1	KQFQDLGR	1	196	>sp|Q9BUQ8|DDX23_HUMAN Probable ATP-dependent RNA helicase DDX23 OS=Homo sapiens GN=DDX23 PE=1 SV=3	990.525	6.53023e-18	7.06163e-25	KMoLEDPQER	1	204	>sp|Q9BUQ8|DDX23_HUMAN Probable ATP-dependent RNA helicase DDX23 OS=Homo sapiens GN=DDX23 PE=1 SV=3	1160.55	5.04144e-19	1.30467e-26	>sp|Q9BUQ8|DDX23_HUMAN Probable ATP-dependent RNA helicase DDX23 OS=Homo sapiens GN=DDX23 PE=1 SV=3-196->sp|Q9BUQ8|DDX23_HUMAN Probable ATP-dependent RNA helicase DDX23 OS=Homo sapiens GN=DDX23 PE=1 SV=3-204	DDX23	DDX23	>sp|Q9BUQ8|DDX23_HUMAN Probable ATP-dependent RNA helicase DDX23 OS=Homo sapiens GN=DDX23 PE=1 SV=3	>sp|Q9BUQ8|DDX23_HUMAN Probable ATP-dependent RNA helicase DDX23 OS=Homo sapiens GN=DDX23 PE=1 SV=3	196	204	0	sp|Q9BUQ8|DDX23_HUMAN	sp|Q9BUQ8|DDX23_HUMAN	DDX23_196	DDX23_204	KQFQDLGR	KMoLEDPQER	DDX23_196-DDX23_204	196	204
2835-1-5-1-6-1	L1_20190826_HS_1023_FU_CL2_8.mgf	12086	4	1930.04	2	YLGGIKK	6	254	>sp|Q9BUQ8|DDX23_HUMAN Probable ATP-dependent RNA helicase DDX23 OS=Homo sapiens GN=DDX23 PE=1 SV=3	777.475	5.01337e-12	3.66743e-22	ELHAIKER	6	246	>sp|Q9BUQ8|DDX23_HUMAN Probable ATP-dependent RNA helicase DDX23 OS=Homo sapiens GN=DDX23 PE=1 SV=3	994.556	1.44924e-11	2.02843e-19	>sp|Q9BUQ8|DDX23_HUMAN Probable ATP-dependent RNA helicase DDX23 OS=Homo sapiens GN=DDX23 PE=1 SV=3-251->sp|Q9BUQ8|DDX23_HUMAN Probable ATP-dependent RNA helicase DDX23 OS=Homo sapiens GN=DDX23 PE=1 SV=3-259	DDX23	DDX23	>sp|Q9BUQ8|DDX23_HUMAN Probable ATP-dependent RNA helicase DDX23 OS=Homo sapiens GN=DDX23 PE=1 SV=3	>sp|Q9BUQ8|DDX23_HUMAN Probable ATP-dependent RNA helicase DDX23 OS=Homo sapiens GN=DDX23 PE=1 SV=3	251	259	0	sp|Q9BUQ8|DDX23_HUMAN	sp|Q9BUQ8|DDX23_HUMAN	DDX23_251	DDX23_259	ELHAIKER	YLGGIKK	DDX23_251-DDX23_259	251	259
2515-1-2-1-7-1	L1_20190826_HS_1023_FU_CL2_5.mgf	11269	4	2692.2	3	FYGDLMoEKR	8	319	>sp|Q9BUQ8|DDX23_HUMAN Probable ATP-dependent RNA helicase DDX23 OS=Homo sapiens GN=DDX23 PE=1 SV=3	1173.55	4.91007e-13	1.65326e-22	TLEEKEQEEAR	5	329	>sp|Q9BUQ8|DDX23_HUMAN Probable ATP-dependent RNA helicase DDX23 OS=Homo sapiens GN=DDX23 PE=1 SV=3	1360.65	1.56099e-23	2.20048e-33	>sp|Q9BUQ8|DDX23_HUMAN Probable ATP-dependent RNA helicase DDX23 OS=Homo sapiens GN=DDX23 PE=1 SV=3-326->sp|Q9BUQ8|DDX23_HUMAN Probable ATP-dependent RNA helicase DDX23 OS=Homo sapiens GN=DDX23 PE=1 SV=3-333	DDX23	DDX23	>sp|Q9BUQ8|DDX23_HUMAN Probable ATP-dependent RNA helicase DDX23 OS=Homo sapiens GN=DDX23 PE=1 SV=3	>sp|Q9BUQ8|DDX23_HUMAN Probable ATP-dependent RNA helicase DDX23 OS=Homo sapiens GN=DDX23 PE=1 SV=3	326	333	0	sp|Q9BUQ8|DDX23_HUMAN	sp|Q9BUQ8|DDX23_HUMAN	DDX23_326	DDX23_333	FYGDLMoEKR	TLEEKEQEEAR	DDX23_326-DDX23_333	326	333
7448-1-28-1-287-1	L1_20190826_HS_1023_FU_CL2_7.mgf	26506	4	3937.01	1	FGKPLGIR	3	491	>sp|Q9BUQ8|DDX23_HUMAN Probable ATP-dependent RNA helicase DDX23 OS=Homo sapiens GN=DDX23 PE=1 SV=3	886.539	1	6.88975e-11	DSSLPPHILEVIDKCGYKEPTPIQR	14	395	>sp|Q9BUQ8|DDX23_HUMAN Probable ATP-dependent RNA helicase DDX23 OS=Homo sapiens GN=DDX23 PE=1 SV=3	2891.49	4.49568e-20	3.35388e-31	>sp|Q9BUQ8|DDX23_HUMAN Probable ATP-dependent RNA helicase DDX23 OS=Homo sapiens GN=DDX23 PE=1 SV=3-408->sp|Q9BUQ8|DDX23_HUMAN Probable ATP-dependent RNA helicase DDX23 OS=Homo sapiens GN=DDX23 PE=1 SV=3-493	DDX23	DDX23	>sp|Q9BUQ8|DDX23_HUMAN Probable ATP-dependent RNA helicase DDX23 OS=Homo sapiens GN=DDX23 PE=1 SV=3	>sp|Q9BUQ8|DDX23_HUMAN Probable ATP-dependent RNA helicase DDX23 OS=Homo sapiens GN=DDX23 PE=1 SV=3	408	493	0	sp|Q9BUQ8|DDX23_HUMAN	sp|Q9BUQ8|DDX23_HUMAN	DDX23_408	DDX23_493	DSSLPPHILEVIDKCGYKEPTPIQR	FGKPLGIR	DDX23_408-DDX23_493	408	493
4098-1-19-1-17-1	L1_20190826_HS_1023_FU_CL2_6.mgf	15996	5	3536.64	1	AGAKDILVATDVAGR	4	712	>sp|Q9BUQ8|DDX23_HUMAN Probable ATP-dependent RNA helicase DDX23 OS=Homo sapiens GN=DDX23 PE=1 SV=3	1455.8	1.92691e-23	3.37549e-35	MoGYNACTLHGGKGQEQR	12	687	>sp|Q9BUQ8|DDX23_HUMAN Probable ATP-dependent RNA helicase DDX23 OS=Homo sapiens GN=DDX23 PE=1 SV=3	1921.85	9.82627e-09	4.25169e-27	>sp|Q9BUQ8|DDX23_HUMAN Probable ATP-dependent RNA helicase DDX23 OS=Homo sapiens GN=DDX23 PE=1 SV=3-698->sp|Q9BUQ8|DDX23_HUMAN Probable ATP-dependent RNA helicase DDX23 OS=Homo sapiens GN=DDX23 PE=1 SV=3-715	DDX23	DDX23	>sp|Q9BUQ8|DDX23_HUMAN Probable ATP-dependent RNA helicase DDX23 OS=Homo sapiens GN=DDX23 PE=1 SV=3	>sp|Q9BUQ8|DDX23_HUMAN Probable ATP-dependent RNA helicase DDX23 OS=Homo sapiens GN=DDX23 PE=1 SV=3	698	715	0	sp|Q9BUQ8|DDX23_HUMAN	sp|Q9BUQ8|DDX23_HUMAN	DDX23_698	DDX23_715	MoGYNACTLHGGKGQEQR	AGAKDILVATDVAGR	DDX23_698-DDX23_715	698	715
2772-1-15-1-4-1	L1_20190826_HS_1023_FU_CL2_5.mgf	12228	4	3199.46	1	KIVSNWDR	1	113	>sp|Q9NQS1|AVEN_HUMAN Cell death regulator Aven OS=Homo sapiens GN=AVEN PE=1 SV=1	1016.54	2.67757e-07	4.97588e-15	YQDIEKEVNNESGESQR	6	121	>sp|Q9NQS1|AVEN_HUMAN Cell death regulator Aven OS=Homo sapiens GN=AVEN PE=1 SV=1	2023.91	1.87843e-20	2.71833e-36	>sp|Q9NQS1|AVEN_HUMAN Cell death regulator Aven OS=Homo sapiens GN=AVEN PE=1 SV=1-113->sp|Q9NQS1|AVEN_HUMAN Cell death regulator Aven OS=Homo sapiens GN=AVEN PE=1 SV=1-126	AVEN	AVEN	>sp|Q9NQS1|AVEN_HUMAN Cell death regulator Aven OS=Homo sapiens GN=AVEN PE=1 SV=1	>sp|Q9NQS1|AVEN_HUMAN Cell death regulator Aven OS=Homo sapiens GN=AVEN PE=1 SV=1	113	126	0	sp|Q9NQS1|AVEN_HUMAN	sp|Q9NQS1|AVEN_HUMAN	AVEN_113	AVEN_126	KIVSNWDR	YQDIEKEVNNESGESQR	AVEN_113-AVEN_126	113	126
1665-1-4-1-13-1	L1_20190826_HS_1023_FU_CL2_4.mgf	9730	4	3289.38	1	DAGLSFKDDMoPK	7	49	>sp|Q9NW64-2|RBM22_HUMAN Isoform 2 of Pre-mRNA-splicing factor RBM22 OS=Homo sapiens GN=RBM22,>sp|Q9NW64|RBM22_HUMAN Pre-mRNA-splicing factor RBM22 OS=Homo sapiens GN=RBM22 PE=1 SV=1,>tr|E5RJW4|E5RJW4_HUMAN Pre-mRNA-splicing factor RBM22 (Fragment) OS=Homo sapiens GN=RBM22 PE=1 SV=1	1338.61	1.98078e-13	1.10928e-31	SDVNKEYYTQNMoER	5	61	>sp|Q9NW64-2|RBM22_HUMAN Isoform 2 of Pre-mRNA-splicing factor RBM22 OS=Homo sapiens GN=RBM22,>sp|Q9NW64|RBM22_HUMAN Pre-mRNA-splicing factor RBM22 OS=Homo sapiens GN=RBM22 PE=1 SV=1,>tr|E5RJW4|E5RJW4_HUMAN Pre-mRNA-splicing factor RBM22 (Fragment) OS=Homo sapiens GN=RBM22 PE=1 SV=1	1791.77	8.16019e-13	4.99192e-25	>sp|Q9NW64-2|RBM22_HUMAN Isoform 2 of Pre-mRNA-splicing factor RBM22 OS=Homo sapiens GN=RBM22,>sp|Q9NW64|RBM22_HUMAN Pre-mRNA-splicing factor RBM22 OS=Homo sapiens GN=RBM22 PE=1 SV=1,>tr|E5RJW4|E5RJW4_HUMAN Pre-mRNA-splicing factor RBM22 (Fragment) OS=Homo sapiens GN=RBM22 PE=1 SV=1-55->sp|Q9NW64-2|RBM22_HUMAN Isoform 2 of Pre-mRNA-splicing factor RBM22 OS=Homo sapiens GN=RBM22,>sp|Q9NW64|RBM22_H…	RBM22	RBM22	>sp|Q9NW64-2|RBM22_HUMAN Isoform 2 of Pre-mRNA-splicing factor RBM22 OS=Homo sapiens GN=RBM22	>sp|Q9NW64-2|RBM22_HUMAN Isoform 2 of Pre-mRNA-splicing factor RBM22 OS=Homo sapiens GN=RBM22	3	5	1	sp|Q9NW64-2|RBM22_HUMAN	sp|Q9NW64-2|RBM22_HUMAN	RBM22_3	RBM22_5	SDVNKEYYTQNMoER	DAGLSFKDDMoPK	RBM22_3-RBM22_5	3	5
2660-1-14-1-28-1	L1_20190826_HS_1023_FU_CL2_6.mgf	11311	5	2637.37	1	VSLKGNR	4	440	>sp|Q9NYF8-2|BCLF1_HUMAN Isoform 2 of Bcl-2-associated transcription factor 1 OS=Homo sapiens GN=BCLAF1,>sp|Q9NYF8|BCLF1_HUMAN Bcl-2-associated transcription factor 1 OS=Homo sapiens GN=BCLAF1 PE=1 SV=2	772.456	5.79616e-12	2.00509e-19	LKETGYVVERPSTTK	2	459	>sp|Q9NYF8-2|BCLF1_HUMAN Isoform 2 of Bcl-2-associated transcription factor 1 OS=Homo sapiens GN=BCLAF1,>sp|Q9NYF8|BCLF1_HUMAN Bcl-2-associated transcription factor 1 OS=Homo sapiens GN=BCLAF1 PE=1 SV=2	1706.92	3.1362e-11	5.02215e-24	>sp|Q9NYF8-2|BCLF1_HUMAN Isoform 2 of Bcl-2-associated transcription factor 1 OS=Homo sapiens GN=BCLAF1,>sp|Q9NYF8|BCLF1_HUMAN Bcl-2-associated transcription factor 1 OS=Homo sapiens GN=BCLAF1 PE=1 SV=2-443->sp|Q9NYF8-2|BCLF1_HUMAN Isoform 2 of Bcl-2-associated transcription factor 1 OS=Homo sapiens GN=BCLAF1,>sp|Q9NYF8|BCLF1_HUMAN Bcl-2-associated transcription factor 1 OS=Homo sapiens GN=BCLAF1…	BCLAF1	BCLAF1	>sp|Q9NYF8-2|BCLF1_HUMAN Isoform 2 of Bcl-2-associated transcription factor 1 OS=Homo sapiens GN=BCLAF1	>sp|Q9NYF8-2|BCLF1_HUMAN Isoform 2 of Bcl-2-associated transcription factor 1 OS=Homo sapiens GN=BCLAF1	443	460	1	sp|Q9NYF8-2|BCLF1_HUMAN	sp|Q9NYF8-2|BCLF1_HUMAN	BCLAF1_443	BCLAF1_460	VSLKGNR	LKETGYVVERPSTTK	BCLAF1_443-BCLAF1_460	443	460
4147-1-20-1-248-1	L1_20190826_HS_1023_FU_CL2_6.mgf	16152	5	3963	2	ANLTKAAEHEVPLQER	5	223	>sp|Q9P260-2|K1468_HUMAN Isoform 2 of LisH domain and HEAT repeat-containing protein KIAA1468 OS=Homo sapiens GN=KIAA1468,>sp|Q9P260|K1468_HUMAN LisH domain and HEAT repeat-containing protein KIAA1468 OS=Homo sapiens GN=KIAA1468 PE=1 SV=2,>tr|A0A075B785|A0A075B785_HUMAN LisH domain and HEAT repeat-containing protein KIAA1468 OS=Homo sapiens GN=KIAA1468 PE=1 SV=7	1804.94	1	6.8948e-12	NYKSSPEIQEPIKPLEK	3	240	>sp|Q9P260-2|K1468_HUMAN Isoform 2 of LisH domain and HEAT repeat-containing protein KIAA1468 OS=Homo sapiens GN=KIAA1468,>sp|Q9P260|K1468_HUMAN LisH domain and HEAT repeat-containing protein KIAA1468 OS=Homo sapiens GN=KIAA1468 PE=1 SV=2,>tr|A0A075B785|A0A075B785_HUMAN LisH domain and HEAT repeat-containing protein KIAA1468 OS=Homo sapiens GN=KIAA1468 PE=1 SV=7	1999.06	0.765858	4.95035e-23	>sp|Q9P260-2|K1468_HUMAN Isoform 2 of LisH domain and HEAT repeat-containing protein KIAA1468 OS=Homo sapiens GN=KIAA1468,>sp|Q9P260|K1468_HUMAN LisH domain and HEAT repeat-containing protein KIAA1468 OS=Homo sapiens GN=KIAA1468 PE=1 SV=2,>tr|A0A075B785|A0A075B785_HUMAN LisH domain and HEAT repeat-containing protein KIAA1468 OS=Homo sapiens GN=KIAA1468 PE=1 SV=7-227->sp|Q9P260-2|K1468_HUMAN Isofo…	KIAA1468	KIAA1468	>sp|Q9P260-2|K1468_HUMAN Isoform 2 of LisH domain and HEAT repeat-containing protein KIAA1468 OS=Homo sapiens GN=KIAA1468	>sp|Q9P260-2|K1468_HUMAN Isoform 2 of LisH domain and HEAT repeat-containing protein KIAA1468 OS=Homo sapiens GN=KIAA1468	227	242	1	sp|Q9P260-2|K1468_HUMAN	sp|Q9P260-2|K1468_HUMAN	KIAA1468_227	KIAA1468_242	ANLTKAAEHEVPLQER	NYKSSPEIQEPIKPLEK	KIAA1468_227-KIAA1468_242	227	242
1876-1-4-1-10-1	L1_20190826_HS_1023_FU_CL2_4.mgf	10481	4	2859.43	1	GKGAVGAYGSER	2	186	>sp|Q9UBB9|TFP11_HUMAN Tuftelin-interacting protein 11 OS=Homo sapiens GN=TFIP11 PE=1 SV=1	1150.57	1.8891e-08	2.71929e-19	NAQGIINPIEAKQR	12	171	>sp|Q9UBB9|TFP11_HUMAN Tuftelin-interacting protein 11 OS=Homo sapiens GN=TFIP11 PE=1 SV=1	1550.85	7.37669e-12	9.82361e-21	>sp|Q9UBB9|TFP11_HUMAN Tuftelin-interacting protein 11 OS=Homo sapiens GN=TFIP11 PE=1 SV=1-182->sp|Q9UBB9|TFP11_HUMAN Tuftelin-interacting protein 11 OS=Homo sapiens GN=TFIP11 PE=1 SV=1-187	TFIP11	TFIP11	>sp|Q9UBB9|TFP11_HUMAN Tuftelin-interacting protein 11 OS=Homo sapiens GN=TFIP11 PE=1 SV=1	>sp|Q9UBB9|TFP11_HUMAN Tuftelin-interacting protein 11 OS=Homo sapiens GN=TFIP11 PE=1 SV=1	182	187	0	sp|Q9UBB9|TFP11_HUMAN	sp|Q9UBB9|TFP11_HUMAN	TFIP11_182	TFIP11_187	NAQGIINPIEAKQR	GKGAVGAYGSER	TFIP11_182-TFIP11_187	182	187
1565-1-25-1-20-1	L1_20190826_HS_1023_FU_CL2_4.mgf	9303	4	2519.32	4	LTKEVTAAR	3	120	>sp|Q9UMS4|PRP19_HUMAN Pre-mRNA-processing factor 19 OS=Homo sapiens GN=PRPF19 PE=1 SV=1	987.571	3.80085e-11	6.16117e-18	LQDKATVLTTER	4	176	>sp|Q9UMS4|PRP19_HUMAN Pre-mRNA-processing factor 19 OS=Homo sapiens GN=PRPF19 PE=1 SV=1	1373.75	2.17353e-18	6.53451e-31	>sp|Q9UMS4|PRP19_HUMAN Pre-mRNA-processing factor 19 OS=Homo sapiens GN=PRPF19 PE=1 SV=1-122->sp|Q9UMS4|PRP19_HUMAN Pre-mRNA-processing factor 19 OS=Homo sapiens GN=PRPF19 PE=1 SV=1-179	PRPF19	PRPF19	>sp|Q9UMS4|PRP19_HUMAN Pre-mRNA-processing factor 19 OS=Homo sapiens GN=PRPF19 PE=1 SV=1	>sp|Q9UMS4|PRP19_HUMAN Pre-mRNA-processing factor 19 OS=Homo sapiens GN=PRPF19 PE=1 SV=1	122	179	0	sp|Q9UMS4|PRP19_HUMAN	sp|Q9UMS4|PRP19_HUMAN	PRPF19_122	PRPF19_179	LTKEVTAAR	LQDKATVLTTER	PRPF19_122-PRPF19_179	122	179
6061-1-15-1-14-1	L1_20190826_HS_1023_FU_CL2_6.mgf	22068	5	3244.69	1	SSEQILATLKGHTK	10	252	>sp|Q9UMS4|PRP19_HUMAN Pre-mRNA-processing factor 19 OS=Homo sapiens GN=PRPF19 PE=1 SV=1	1511.83	1	2.41152e-16	ILTGGADKNVVVFDK	8	237	>sp|Q9UMS4|PRP19_HUMAN Pre-mRNA-processing factor 19 OS=Homo sapiens GN=PRPF19 PE=1 SV=1	1574.87	1.59884e-17	1.59884e-17	>sp|Q9UMS4|PRP19_HUMAN Pre-mRNA-processing factor 19 OS=Homo sapiens GN=PRPF19 PE=1 SV=1-244->sp|Q9UMS4|PRP19_HUMAN Pre-mRNA-processing factor 19 OS=Homo sapiens GN=PRPF19 PE=1 SV=1-261	PRPF19	PRPF19	>sp|Q9UMS4|PRP19_HUMAN Pre-mRNA-processing factor 19 OS=Homo sapiens GN=PRPF19 PE=1 SV=1	>sp|Q9UMS4|PRP19_HUMAN Pre-mRNA-processing factor 19 OS=Homo sapiens GN=PRPF19 PE=1 SV=1	244	261	0	sp|Q9UMS4|PRP19_HUMAN	sp|Q9UMS4|PRP19_HUMAN	PRPF19_244	PRPF19_261	ILTGGADKNVVVFDK	SSEQILATLKGHTK	PRPF19_244-PRPF19_261	244	261
6559-1-11-1-22-1	L1_20190826_HS_1023_FU_CL2_6.mgf	23893	4	3249.71	3	LGNAKAQSILR	5	633	>sp|Q9Y223|GLCNE_HUMAN Bifunctional UDP-N-acetylglucosamine 2-epimerase/N-acetylmannosamine kinase OS=Homo sapiens GN=GNE PE=1 SV=1,>sp|Q9Y223-2|GLCNE_HUMAN Isoform 2 of Bifunctional UDP-N-acetylglucosamine 2-epimerase/N-acetylmannosamine kinase OS=Homo sapiens GN=GNE,>sp|Q9Y223-4|GLCNE_HUMAN Isoform 4 of Bifunctional UDP-N-acetylglucosamine 2-epimerase/N-acetylmannosamine kinase OS=Homo sapiens …	1169.69	3.22404e-05	1.04594e-14	KLHDEDLLLVEGMSVPK	1	602	>sp|Q9Y223|GLCNE_HUMAN Bifunctional UDP-N-acetylglucosamine 2-epimerase/N-acetylmannosamine kinase OS=Homo sapiens GN=GNE PE=1 SV=1,>sp|Q9Y223-2|GLCNE_HUMAN Isoform 2 of Bifunctional UDP-N-acetylglucosamine 2-epimerase/N-acetylmannosamine kinase OS=Homo sapiens GN=GNE,>sp|Q9Y223-4|GLCNE_HUMAN Isoform 4 of Bifunctional UDP-N-acetylglucosamine 2-epimerase/N-acetylmannosamine kinase OS=Homo sapiens …	1922.02	6.14529e-31	1.31789e-43	>sp|Q9Y223|GLCNE_HUMAN Bifunctional UDP-N-acetylglucosamine 2-epimerase/N-acetylmannosamine kinase OS=Homo sapiens GN=GNE PE=1 SV=1,>sp|Q9Y223-2|GLCNE_HUMAN Isoform 2 of Bifunctional UDP-N-acetylglucosamine 2-epimerase/N-acetylmannosamine kinase OS=Homo sapiens GN=GNE,>sp|Q9Y223-4|GLCNE_HUMAN Isoform 4 of Bifunctional UDP-N-acetylglucosamine 2-epimerase/N-acetylmannosamine kinase OS=Homo sapiens …	GNE	GNE	>sp|Q9Y223|GLCNE_HUMAN Bifunctional UDP-N-acetylglucosamine 2-epimerase/N-acetylmannosamine kinase OS=Homo sapiens GN=GNE PE=1 SV=1	>sp|Q9Y223|GLCNE_HUMAN Bifunctional UDP-N-acetylglucosamine 2-epimerase/N-acetylmannosamine kinase OS=Homo sapiens GN=GNE PE=1 SV=1	602	637	1	sp|Q9Y223|GLCNE_HUMAN	sp|Q9Y223|GLCNE_HUMAN	GNE_602	GNE_637	KLHDEDLLLVEGMSVPK	LGNAKAQSILR	GNE_602-GNE_637	602	637
3519-1-15-1-13-1	L1_20190826_HS_1023_FU_CL2_7.mgf	14100	5	3142.54	1	ENIKQIVK	4	880	>sp|Q9Y5B6|PAXB1_HUMAN PAX3- and PAX7-binding protein 1 OS=Homo sapiens GN=PAXBP1 PE=1 SV=2	970.581	1.23692e-07	1.7927e-15	ALDHAMoSVASDHNVKEFK	15	894	>sp|Q9Y5B6|PAXB1_HUMAN PAX3- and PAX7-binding protein 1 OS=Homo sapiens GN=PAXBP1 PE=1 SV=2	2013.96	1.54782e-16	1.00859e-36	>sp|Q9Y5B6|PAXB1_HUMAN PAX3- and PAX7-binding protein 1 OS=Homo sapiens GN=PAXBP1 PE=1 SV=2-883->sp|Q9Y5B6|PAXB1_HUMAN PAX3- and PAX7-binding protein 1 OS=Homo sapiens GN=PAXBP1 PE=1 SV=2-908	PAXBP1	PAXBP1	>sp|Q9Y5B6|PAXB1_HUMAN PAX3- and PAX7-binding protein 1 OS=Homo sapiens GN=PAXBP1 PE=1 SV=2	>sp|Q9Y5B6|PAXB1_HUMAN PAX3- and PAX7-binding protein 1 OS=Homo sapiens GN=PAXBP1 PE=1 SV=2	883	908	0	sp|Q9Y5B6|PAXB1_HUMAN	sp|Q9Y5B6|PAXB1_HUMAN	PAXBP1_883	PAXBP1_908	ENIKQIVK	ALDHAMoSVASDHNVKEFK	PAXBP1_883-PAXBP1_908	883	908
2518-1-2-1-9-1	L1_20190826_HS_1023_FU_CL2_4.mgf	12821	4	2448.23	3	SGLKPPLR	4	361	>sp|Q9Y6A5|TACC3_HUMAN Transforming acidic coiled-coil-containing protein 3 OS=Homo sapiens GN=TACC3 PE=1 SV=1	866.534	2.03484e-05	1.33033e-13	LEFDVSDGATSKR	12	338	>sp|Q9Y6A5|TACC3_HUMAN Transforming acidic coiled-coil-containing protein 3 OS=Homo sapiens GN=TACC3 PE=1 SV=1	1423.69	5.61195e-16	6.33493e-28	>sp|Q9Y6A5|TACC3_HUMAN Transforming acidic coiled-coil-containing protein 3 OS=Homo sapiens GN=TACC3 PE=1 SV=1-349->sp|Q9Y6A5|TACC3_HUMAN Transforming acidic coiled-coil-containing protein 3 OS=Homo sapiens GN=TACC3 PE=1 SV=1-364	TACC3	TACC3	>sp|Q9Y6A5|TACC3_HUMAN Transforming acidic coiled-coil-containing protein 3 OS=Homo sapiens GN=TACC3 PE=1 SV=1	>sp|Q9Y6A5|TACC3_HUMAN Transforming acidic coiled-coil-containing protein 3 OS=Homo sapiens GN=TACC3 PE=1 SV=1	349	364	0	sp|Q9Y6A5|TACC3_HUMAN	sp|Q9Y6A5|TACC3_HUMAN	TACC3_349	TACC3_364	LEFDVSDGATSKR	SGLKPPLR	TACC3_349-TACC3_364	349	364
1923-1-16-1-5-1	L1_20190826_HS_1023_FU_CL2_4.mgf	10631	4	2752.35	1	AEIQKVLK	5	699	>sp|Q9Y6A5|TACC3_HUMAN Transforming acidic coiled-coil-containing protein 3 OS=Homo sapiens GN=TACC3 PE=1 SV=1	927.575	0.124926	9.07978e-11	EKDQLTTDLNSMoEK	2	707	>sp|Q9Y6A5|TACC3_HUMAN Transforming acidic coiled-coil-containing protein 3 OS=Homo sapiens GN=TACC3 PE=1 SV=1	1666.77	9.83655e-28	9.83655e-28	>sp|Q9Y6A5|TACC3_HUMAN Transforming acidic coiled-coil-containing protein 3 OS=Homo sapiens GN=TACC3 PE=1 SV=1-703->sp|Q9Y6A5|TACC3_HUMAN Transforming acidic coiled-coil-containing protein 3 OS=Homo sapiens GN=TACC3 PE=1 SV=1-708	TACC3	TACC3	>sp|Q9Y6A5|TACC3_HUMAN Transforming acidic coiled-coil-containing protein 3 OS=Homo sapiens GN=TACC3 PE=1 SV=1	>sp|Q9Y6A5|TACC3_HUMAN Transforming acidic coiled-coil-containing protein 3 OS=Homo sapiens GN=TACC3 PE=1 SV=1	703	708	0	sp|Q9Y6A5|TACC3_HUMAN	sp|Q9Y6A5|TACC3_HUMAN	TACC3_703	TACC3_708	AEIQKVLK	EKDQLTTDLNSMoEK	TACC3_703-TACC3_708	703	708
4435-1-16-1-25-1	L1_20190826_HS_1023_FU_CL2_8.mgf	17164	5	3492.73	1	YQALKAHAEEK	5	764	>sp|Q9Y6A5|TACC3_HUMAN Transforming acidic coiled-coil-containing protein 3 OS=Homo sapiens GN=TACC3 PE=1 SV=1	1286.66	0.00270094	3.92039e-13	AHAEEKLQLANEEIAQVR	6	769	>sp|Q9Y6A5|TACC3_HUMAN Transforming acidic coiled-coil-containing protein 3 OS=Homo sapiens GN=TACC3 PE=1 SV=1	2048.07	2.16505e-39	4.47965e-52	>sp|Q9Y6A5|TACC3_HUMAN Transforming acidic coiled-coil-containing protein 3 OS=Homo sapiens GN=TACC3 PE=1 SV=1-768->sp|Q9Y6A5|TACC3_HUMAN Transforming acidic coiled-coil-containing protein 3 OS=Homo sapiens GN=TACC3 PE=1 SV=1-774	TACC3	TACC3	>sp|Q9Y6A5|TACC3_HUMAN Transforming acidic coiled-coil-containing protein 3 OS=Homo sapiens GN=TACC3 PE=1 SV=1	>sp|Q9Y6A5|TACC3_HUMAN Transforming acidic coiled-coil-containing protein 3 OS=Homo sapiens GN=TACC3 PE=1 SV=1	768	774	0	sp|Q9Y6A5|TACC3_HUMAN	sp|Q9Y6A5|TACC3_HUMAN	TACC3_768	TACC3_774	YQALKAHAEEK	AHAEEKLQLANEEIAQVR	TACC3_768-TACC3_774	768	774
3050-1-1-1-3-1	L1_20190826_HS_1023_FU_CL2_7.mgf	12568	5	2445.26	2	SVHKVEPITK	4	61	>tr|A0A024RA52|A0A024RA52_HUMAN Proteasome subunit alpha type OS=Homo sapiens GN=PSMA2 PE=1 SV=1,>sp|P25787|PSA2_HUMAN Proteasome subunit alpha type-2 OS=Homo sapiens GN=PSMA2 PE=1 SV=2	1136.66	1	2.34733e-12	QKSILYDER	2	52	>tr|A0A024RA52|A0A024RA52_HUMAN Proteasome subunit alpha type OS=Homo sapiens GN=PSMA2 PE=1 SV=1,>sp|P25787|PSA2_HUMAN Proteasome subunit alpha type-2 OS=Homo sapiens GN=PSMA2 PE=1 SV=2	1150.6	1.89706e-15	1.89706e-15	>tr|A0A024RA52|A0A024RA52_HUMAN Proteasome subunit alpha type OS=Homo sapiens GN=PSMA2 PE=1 SV=1,>sp|P25787|PSA2_HUMAN Proteasome subunit alpha type-2 OS=Homo sapiens GN=PSMA2 PE=1 SV=2-53->tr|A0A024RA52|A0A024RA52_HUMAN Proteasome subunit alpha type OS=Homo sapiens GN=PSMA2 PE=1 SV=1,>sp|P25787|PSA2_HUMAN Proteasome subunit alpha type-2 OS=Homo sapiens GN=PSMA2 PE=1 SV=2-64	PSMA2	PSMA2	>tr|A0A024RA52|A0A024RA52_HUMAN Proteasome subunit alpha type OS=Homo sapiens GN=PSMA2 PE=1 SV=1	>tr|A0A024RA52|A0A024RA52_HUMAN Proteasome subunit alpha type OS=Homo sapiens GN=PSMA2 PE=1 SV=1	53	64	1	tr|A0A024RA52|A0A024RA52_HUMAN	tr|A0A024RA52|A0A024RA52_HUMAN	PSMA2_53	PSMA2_64	QKSILYDER	SVHKVEPITK	PSMA2_53-PSMA2_64	53	64
7712-1-1-1-12-1	L1_20190826_HS_1023_FU_CL2_7.mgf	27336	4	2668.36	2	TFLEKR	5	172	>tr|A0A024RA52|A0A024RA52_HUMAN Proteasome subunit alpha type OS=Homo sapiens GN=PSMA2 PE=1 SV=1,>sp|P25787|PSA2_HUMAN Proteasome subunit alpha type-2 OS=Homo sapiens GN=PSMA2 PE=1 SV=2,>tr|C9JCK5|C9JCK5_HUMAN Proteasome subunit alpha type-2 OS=Homo sapiens GN=PSMA2 PE=1 SV=1	792.449	1.08896e-05	3.82058e-15	NIHKLLDEVFFSEK	4	51	>tr|H0YMZ1|H0YMZ1_HUMAN Proteasome subunit alpha type (Fragment) OS=Homo sapiens GN=PSMA4 PE=1 SV=8,>tr|H0YL69|H0YL69_HUMAN Proteasome subunit alpha type (Fragment) OS=Homo sapiens GN=PSMA4 PE=1 SV=1,>sp|P25789|PSA4_HUMAN Proteasome subunit alpha type-4 OS=Homo sapiens GN=PSMA4 PE=1 SV=1,>tr|H0YMI6|H0YMI6_HUMAN Proteasome subunit alpha type (Fragment) OS=Homo sapiens GN=PSMA4 PE=1 SV=1,>tr|H0YMA1…	1717.9	1.45191e-05	2.50694e-16	>tr|A0A024RA52|A0A024RA52_HUMAN Proteasome subunit alpha type OS=Homo sapiens GN=PSMA2 PE=1 SV=1,>sp|P25787|PSA2_HUMAN Proteasome subunit alpha type-2 OS=Homo sapiens GN=PSMA2 PE=1 SV=2,>tr|C9JCK5|C9JCK5_HUMAN Proteasome subunit alpha type-2 OS=Homo sapiens GN=PSMA2 PE=1 SV=1-176->tr|H0YMZ1|H0YMZ1_HUMAN Proteasome subunit alpha type (Fragment) OS=Homo sapiens GN=PSMA4 PE=1 SV=8,>tr|H0YL69|H0YL69_…	PSMA2	PSMA4	>tr|A0A024RA52|A0A024RA52_HUMAN Proteasome subunit alpha type OS=Homo sapiens GN=PSMA2 PE=1 SV=1	>tr|H0YMZ1|H0YMZ1_HUMAN Proteasome subunit alpha type (Fragment) OS=Homo sapiens GN=PSMA4 PE=1 SV=8	176	54	1	tr|A0A024RA52|A0A024RA52_HUMAN	tr|H0YMZ1|H0YMZ1_HUMAN	PSMA2_176	PSMA4_54	TFLEKR	NIHKLLDEVFFSEK	PSMA2_176-PSMA4_54	176	54
164-1-2-1-1-1	L1_20190826_HS_1023_FU_CL2_4.mgf	3883	4	2931.34	2	GKGGSGDSAVK	2	27	>tr|A0A087WZK9|A0A087WZK9_HUMAN Eukaryotic translation initiation factor 3 subunit H OS=Homo sapiens GN=EIF3H PE=1 SV=1,>tr|B3KS98|B3KS98_HUMAN Eukaryotic translation initiation factor 3 subunit H OS=Homo sapiens GN=EIF3H PE=1 SV=1,>sp|O15372|EIF3H_HUMAN Eukaryotic translation initiation factor 3 subunit H OS=Homo sapiens GN=EIF3H PE=1 SV=1	961.483	3.0394e-05	4.58459e-15	EGTGSTATSSSSTAGAAGKGK	19	6	>tr|A0A087WZK9|A0A087WZK9_HUMAN Eukaryotic translation initiation factor 3 subunit H OS=Homo sapiens GN=EIF3H PE=1 SV=1,>tr|B3KS98|B3KS98_HUMAN Eukaryotic translation initiation factor 3 subunit H OS=Homo sapiens GN=EIF3H PE=1 SV=1,>sp|O15372|EIF3H_HUMAN Eukaryotic translation initiation factor 3 subunit H OS=Homo sapiens GN=EIF3H PE=1 SV=1	1811.85	8.77862e-34	5.70151e-53	>tr|A0A087WZK9|A0A087WZK9_HUMAN Eukaryotic translation initiation factor 3 subunit H OS=Homo sapiens GN=EIF3H PE=1 SV=1,>tr|B3KS98|B3KS98_HUMAN Eukaryotic translation initiation factor 3 subunit H OS=Homo sapiens GN=EIF3H PE=1 SV=1,>sp|O15372|EIF3H_HUMAN Eukaryotic translation initiation factor 3 subunit H OS=Homo sapiens GN=EIF3H PE=1 SV=1-24->tr|A0A087WZK9|A0A087WZK9_HUMAN Eukaryotic translatio…	EIF3H	EIF3H	>tr|A0A087WZK9|A0A087WZK9_HUMAN Eukaryotic translation initiation factor 3 subunit H OS=Homo sapiens GN=EIF3H PE=1 SV=1	>tr|A0A087WZK9|A0A087WZK9_HUMAN Eukaryotic translation initiation factor 3 subunit H OS=Homo sapiens GN=EIF3H PE=1 SV=1	24	28	1	tr|A0A087WZK9|A0A087WZK9_HUMAN	tr|A0A087WZK9|A0A087WZK9_HUMAN	EIF3H_24	EIF3H_28	EGTGSTATSSSSTAGAAGKGK	GKGGSGDSAVK	EIF3H_24-EIF3H_28	24	28
6791-1-24-1-2-1	L1_20190826_HS_1023_FU_CL2_7.mgf	24281	5	2576.34	8	IVSGKVR	5	257	>tr|A0A0A0MS54|A0A0A0MS54_HUMAN cAMP-dependent protein kinase catalytic subunit beta OS=Homo sapiens GN=PRKACB PE=1 SV=1,>sp|P22694-4|KAPCB_HUMAN Isoform 4 of cAMP-dependent protein kinase catalytic subunit beta OS=Homo sapiens GN=PRKACB,>sp|P22694-3|KAPCB_HUMAN Isoform 3 of cAMP-dependent protein kinase catalytic subunit beta OS=Homo sapiens GN=PRKACB,>sp|P22694|KAPCB_HUMAN cAMP-dependent protei…	757.481	8.72528e-06	1.77893e-14	FPSHFSSDLKDLLR	10	264	>tr|A0A0A0MS54|A0A0A0MS54_HUMAN cAMP-dependent protein kinase catalytic subunit beta OS=Homo sapiens GN=PRKACB PE=1 SV=1,>sp|P22694-4|KAPCB_HUMAN Isoform 4 of cAMP-dependent protein kinase catalytic subunit beta OS=Homo sapiens GN=PRKACB,>sp|P22694-3|KAPCB_HUMAN Isoform 3 of cAMP-dependent protein kinase catalytic subunit beta OS=Homo sapiens GN=PRKACB,>sp|P22694|KAPCB_HUMAN cAMP-dependent protei…	1660.86	5.45066e-20	3.04903e-40	>tr|A0A0A0MS54|A0A0A0MS54_HUMAN cAMP-dependent protein kinase catalytic subunit beta OS=Homo sapiens GN=PRKACB PE=1 SV=1,>sp|P22694-4|KAPCB_HUMAN Isoform 4 of cAMP-dependent protein kinase catalytic subunit beta OS=Homo sapiens GN=PRKACB,>sp|P22694-3|KAPCB_HUMAN Isoform 3 of cAMP-dependent protein kinase catalytic subunit beta OS=Homo sapiens GN=PRKACB,>sp|P22694|KAPCB_HUMAN cAMP-dependent protei…	PRKACA	PRKACA	>sp|P17612|KAPCA_HUMAN cAMP-dependent protein kinase catalytic subunit alpha OS=Homo sapiens GN=PRKACA PE=1 SV=2	>sp|P17612|KAPCA_HUMAN cAMP-dependent protein kinase catalytic subunit alpha OS=Homo sapiens GN=PRKACA PE=1 SV=2	255	267	1	sp|P17612|KAPCA_HUMAN	sp|P17612|KAPCA_HUMAN	PRKACA_255	PRKACA_267	IVSGKVR	FPSHFSSDLKDLLR	PRKACA_255-PRKACA_267	255	267
4030-1-2-1-1-1	L1_20190826_HS_1023_FU_CL2_5.mgf	16195	4	2114.19	1	IVSGKVR	5	257	>tr|A0A0A0MS54|A0A0A0MS54_HUMAN cAMP-dependent protein kinase catalytic subunit beta OS=Homo sapiens GN=PRKACB PE=1 SV=1,>sp|P22694-4|KAPCB_HUMAN Isoform 4 of cAMP-dependent protein kinase catalytic subunit beta OS=Homo sapiens GN=PRKACB,>sp|P22694-3|KAPCB_HUMAN Isoform 3 of cAMP-dependent protein kinase catalytic subunit beta OS=Homo sapiens GN=PRKACB,>sp|P22694|KAPCB_HUMAN cAMP-dependent protei…	757.481	4.42611e-05	1.82522e-14	NLLQVDLTKR	9	278	>tr|A0A0A0MS54|A0A0A0MS54_HUMAN cAMP-dependent protein kinase catalytic subunit beta OS=Homo sapiens GN=PRKACB PE=1 SV=1,>sp|P22694-4|KAPCB_HUMAN Isoform 4 of cAMP-dependent protein kinase catalytic subunit beta OS=Homo sapiens GN=PRKACB,>sp|P22694-3|KAPCB_HUMAN Isoform 3 of cAMP-dependent protein kinase catalytic subunit beta OS=Homo sapiens GN=PRKACB,>sp|P22694|KAPCB_HUMAN cAMP-dependent protei…	1198.7	4.88817e-20	6.35067e-30	>tr|A0A0A0MS54|A0A0A0MS54_HUMAN cAMP-dependent protein kinase catalytic subunit beta OS=Homo sapiens GN=PRKACB PE=1 SV=1,>sp|P22694-4|KAPCB_HUMAN Isoform 4 of cAMP-dependent protein kinase catalytic subunit beta OS=Homo sapiens GN=PRKACB,>sp|P22694-3|KAPCB_HUMAN Isoform 3 of cAMP-dependent protein kinase catalytic subunit beta OS=Homo sapiens GN=PRKACB,>sp|P22694|KAPCB_HUMAN cAMP-dependent protei…	PRKACA	PRKACA	>sp|P17612|KAPCA_HUMAN cAMP-dependent protein kinase catalytic subunit alpha OS=Homo sapiens GN=PRKACA PE=1 SV=2	>sp|P17612|KAPCA_HUMAN cAMP-dependent protein kinase catalytic subunit alpha OS=Homo sapiens GN=PRKACA PE=1 SV=2	255	280	1	sp|P17612|KAPCA_HUMAN	sp|P17612|KAPCA_HUMAN	PRKACA_255	PRKACA_280	IVSGKVR	NLLQVDLTKR	PRKACA_255-PRKACA_280	255	280
5064-1-4-1-2-1	L1_20190826_HS_1023_FU_CL2_7.mgf	18870	4	2612.36	3	LNLLKR	5	11	>tr|A0A0U1RRM1|A0A0U1RRM1_HUMAN Transcriptional repressor p66-beta OS=Homo sapiens GN=GATAD2B PE=1 SV=1,>sp|Q8WXI9|P66B_HUMAN Transcriptional repressor p66-beta OS=Homo sapiens GN=GATAD2B PE=1 SV=1	755.502	0.000436111	4.72345e-11	SLDPADERDDVLAKR	14	17	>tr|A0A0U1RRM1|A0A0U1RRM1_HUMAN Transcriptional repressor p66-beta OS=Homo sapiens GN=GATAD2B PE=1 SV=1,>sp|Q8WXI9|P66B_HUMAN Transcriptional repressor p66-beta OS=Homo sapiens GN=GATAD2B PE=1 SV=1	1698.85	1.03591e-19	1.03591e-19	>tr|A0A0U1RRM1|A0A0U1RRM1_HUMAN Transcriptional repressor p66-beta OS=Homo sapiens GN=GATAD2B PE=1 SV=1,>sp|Q8WXI9|P66B_HUMAN Transcriptional repressor p66-beta OS=Homo sapiens GN=GATAD2B PE=1 SV=1-15->tr|A0A0U1RRM1|A0A0U1RRM1_HUMAN Transcriptional repressor p66-beta OS=Homo sapiens GN=GATAD2B PE=1 SV=1,>sp|Q8WXI9|P66B_HUMAN Transcriptional repressor p66-beta OS=Homo sapiens GN=GATAD2B PE=1 SV=1-…	GATAD2B	GATAD2B	>tr|A0A0U1RRM1|A0A0U1RRM1_HUMAN Transcriptional repressor p66-beta OS=Homo sapiens GN=GATAD2B PE=1 SV=1	>tr|A0A0U1RRM1|A0A0U1RRM1_HUMAN Transcriptional repressor p66-beta OS=Homo sapiens GN=GATAD2B PE=1 SV=1	15	30	1	tr|A0A0U1RRM1|A0A0U1RRM1_HUMAN	tr|A0A0U1RRM1|A0A0U1RRM1_HUMAN	GATAD2B_15	GATAD2B_30	LNLLKR	SLDPADERDDVLAKR	GATAD2B_15-GATAD2B_30	15	30
6487-1-1-1-2-1	L1_20190826_HS_1023_FU_CL2_6.mgf	23671	4	2785.47	1	LKMLALLK	2	43	>tr|A0A0U1RRM1|A0A0U1RRM1_HUMAN Transcriptional repressor p66-beta OS=Homo sapiens GN=GATAD2B PE=1 SV=1,>sp|Q8WXI9|P66B_HUMAN Transcriptional repressor p66-beta OS=Homo sapiens GN=GATAD2B PE=1 SV=1	928.614	0.000533047	1.0639e-12	SLDPADERDDVLAKR	14	17	>tr|A0A0U1RRM1|A0A0U1RRM1_HUMAN Transcriptional repressor p66-beta OS=Homo sapiens GN=GATAD2B PE=1 SV=1,>sp|Q8WXI9|P66B_HUMAN Transcriptional repressor p66-beta OS=Homo sapiens GN=GATAD2B PE=1 SV=1	1698.85	1.76506e-08	4.25019e-19	>tr|A0A0U1RRM1|A0A0U1RRM1_HUMAN Transcriptional repressor p66-beta OS=Homo sapiens GN=GATAD2B PE=1 SV=1,>sp|Q8WXI9|P66B_HUMAN Transcriptional repressor p66-beta OS=Homo sapiens GN=GATAD2B PE=1 SV=1-30->tr|A0A0U1RRM1|A0A0U1RRM1_HUMAN Transcriptional repressor p66-beta OS=Homo sapiens GN=GATAD2B PE=1 SV=1,>sp|Q8WXI9|P66B_HUMAN Transcriptional repressor p66-beta OS=Homo sapiens GN=GATAD2B PE=1 SV=1-…	GATAD2B	GATAD2B	>tr|A0A0U1RRM1|A0A0U1RRM1_HUMAN Transcriptional repressor p66-beta OS=Homo sapiens GN=GATAD2B PE=1 SV=1	>tr|A0A0U1RRM1|A0A0U1RRM1_HUMAN Transcriptional repressor p66-beta OS=Homo sapiens GN=GATAD2B PE=1 SV=1	30	44	1	tr|A0A0U1RRM1|A0A0U1RRM1_HUMAN	tr|A0A0U1RRM1|A0A0U1RRM1_HUMAN	GATAD2B_30	GATAD2B_44	SLDPADERDDVLAKR	LKMLALLK	GATAD2B_30-GATAD2B_44	30	44
6214-1-1-1-8-1	L1_20190826_HS_1023_FU_CL2_6.mgf	22677	5	2704.46	1	MLALLKR	6	45	>tr|A0A0U1RRM1|A0A0U1RRM1_HUMAN Transcriptional repressor p66-beta OS=Homo sapiens GN=GATAD2B PE=1 SV=1,>sp|Q8WXI9|P66B_HUMAN Transcriptional repressor p66-beta OS=Homo sapiens GN=GATAD2B PE=1 SV=1	843.536	1.76397e-10	6.28985e-21	KDLANLEVPHELPTK	1	52	>tr|A0A0U1RRM1|A0A0U1RRM1_HUMAN Transcriptional repressor p66-beta OS=Homo sapiens GN=GATAD2B PE=1 SV=1,>sp|Q8WXI9|P66B_HUMAN Transcriptional repressor p66-beta OS=Homo sapiens GN=GATAD2B PE=1 SV=1	1702.93	2.45992e-18	3.3277e-35	>tr|A0A0U1RRM1|A0A0U1RRM1_HUMAN Transcriptional repressor p66-beta OS=Homo sapiens GN=GATAD2B PE=1 SV=1,>sp|Q8WXI9|P66B_HUMAN Transcriptional repressor p66-beta OS=Homo sapiens GN=GATAD2B PE=1 SV=1-50->tr|A0A0U1RRM1|A0A0U1RRM1_HUMAN Transcriptional repressor p66-beta OS=Homo sapiens GN=GATAD2B PE=1 SV=1,>sp|Q8WXI9|P66B_HUMAN Transcriptional repressor p66-beta OS=Homo sapiens GN=GATAD2B PE=1 SV=1-…	GATAD2B	GATAD2B	>tr|A0A0U1RRM1|A0A0U1RRM1_HUMAN Transcriptional repressor p66-beta OS=Homo sapiens GN=GATAD2B PE=1 SV=1	>tr|A0A0U1RRM1|A0A0U1RRM1_HUMAN Transcriptional repressor p66-beta OS=Homo sapiens GN=GATAD2B PE=1 SV=1	50	52	1	tr|A0A0U1RRM1|A0A0U1RRM1_HUMAN	tr|A0A0U1RRM1|A0A0U1RRM1_HUMAN	GATAD2B_50	GATAD2B_52	MLALLKR	KDLANLEVPHELPTK	GATAD2B_50-GATAD2B_52	50	52
2919-2-6-1-1-1	L1_20190826_HS_1023_FU_CL2_8.mgf	12353	5	4298.99	2	GYEEKLNGNLRPHGDNR	5	74	>tr|A0A0U1RRM1|A0A0U1RRM1_HUMAN Transcriptional repressor p66-beta OS=Homo sapiens GN=GATAD2B PE=1 SV=1,>sp|Q8WXI9|P66B_HUMAN Transcriptional repressor p66-beta OS=Homo sapiens GN=GATAD2B PE=1 SV=1	1967.96	0.000217529	1.68399e-18	TAGRPGKENINDEPVDMoSAR	7	91	>tr|A0A0U1RRM1|A0A0U1RRM1_HUMAN Transcriptional repressor p66-beta OS=Homo sapiens GN=GATAD2B PE=1 SV=1,>sp|Q8WXI9|P66B_HUMAN Transcriptional repressor p66-beta OS=Homo sapiens GN=GATAD2B PE=1 SV=1	2172.02	4.87839e-13	7.79672e-21	>tr|A0A0U1RRM1|A0A0U1RRM1_HUMAN Transcriptional repressor p66-beta OS=Homo sapiens GN=GATAD2B PE=1 SV=1,>sp|Q8WXI9|P66B_HUMAN Transcriptional repressor p66-beta OS=Homo sapiens GN=GATAD2B PE=1 SV=1-78->tr|A0A0U1RRM1|A0A0U1RRM1_HUMAN Transcriptional repressor p66-beta OS=Homo sapiens GN=GATAD2B PE=1 SV=1,>sp|Q8WXI9|P66B_HUMAN Transcriptional repressor p66-beta OS=Homo sapiens GN=GATAD2B PE=1 SV=1-…	GATAD2B	GATAD2B	>tr|A0A0U1RRM1|A0A0U1RRM1_HUMAN Transcriptional repressor p66-beta OS=Homo sapiens GN=GATAD2B PE=1 SV=1	>tr|A0A0U1RRM1|A0A0U1RRM1_HUMAN Transcriptional repressor p66-beta OS=Homo sapiens GN=GATAD2B PE=1 SV=1	5	78	1	tr|A0A0U1RRM1|A0A0U1RRM1_HUMAN	tr|A0A0U1RRM1|A0A0U1RRM1_HUMAN	GATAD2B_5	GATAD2B_78	TAGRPGKENINDEPVDMoSAR	GYEEKLNGNLRPHGDNR	GATAD2B_5-GATAD2B_78	5	78
6824-1-8-1-103-1	L1_20190826_HS_1023_FU_CL2_6.mgf	24716	4	3614.78	1	LDKYPTLLKELER	9	232	>tr|B1ALK7|B1ALK7_HUMAN Rho guanine nucleotide exchange factor 7 OS=Homo sapiens GN=ARHGEF7 PE=1 SV=1,>sp|Q14155-1|ARHG7_HUMAN Isoform 1 of Rho guanine nucleotide exchange factor 7 OS=Homo sapiens GN=ARHGEF7,>sp|Q14155-5|ARHG7_HUMAN Isoform 5 of Rho guanine nucleotide exchange factor 7 OS=Homo sapiens GN=ARHGEF7,>sp|Q14155-6|ARHG7_HUMAN Isoform 6 of Rho guanine nucleotide exchange factor 7 OS=Hom…	1616.91	5.69937e-09	3.76075e-21	SMAAFKNLSAQCQEVR	6	259	>tr|B1ALK7|B1ALK7_HUMAN Rho guanine nucleotide exchange factor 7 OS=Homo sapiens GN=ARHGEF7 PE=1 SV=1,>sp|Q14155-1|ARHG7_HUMAN Isoform 1 of Rho guanine nucleotide exchange factor 7 OS=Homo sapiens GN=ARHGEF7,>sp|Q14155-5|ARHG7_HUMAN Isoform 5 of Rho guanine nucleotide exchange factor 7 OS=Homo sapiens GN=ARHGEF7,>sp|Q14155-6|ARHG7_HUMAN Isoform 6 of Rho guanine nucleotide exchange factor 7 OS=Hom…	1838.88	2.22213e-14	2.22213e-14	>tr|B1ALK7|B1ALK7_HUMAN Rho guanine nucleotide exchange factor 7 OS=Homo sapiens GN=ARHGEF7 PE=1 SV=1,>sp|Q14155-1|ARHG7_HUMAN Isoform 1 of Rho guanine nucleotide exchange factor 7 OS=Homo sapiens GN=ARHGEF7,>sp|Q14155-5|ARHG7_HUMAN Isoform 5 of Rho guanine nucleotide exchange factor 7 OS=Homo sapiens GN=ARHGEF7,>sp|Q14155-6|ARHG7_HUMAN Isoform 6 of Rho guanine nucleotide exchange factor 7 OS=Hom…	ARHGEF7	ARHGEF7	>tr|B1ALK7|B1ALK7_HUMAN Rho guanine nucleotide exchange factor 7 OS=Homo sapiens GN=ARHGEF7 PE=1 SV=1	>tr|B1ALK7|B1ALK7_HUMAN Rho guanine nucleotide exchange factor 7 OS=Homo sapiens GN=ARHGEF7 PE=1 SV=1	240	264	1	tr|B1ALK7|B1ALK7_HUMAN	tr|B1ALK7|B1ALK7_HUMAN	ARHGEF7_240	ARHGEF7_264	LDKYPTLLKELER	SMAAFKNLSAQCQEVR	ARHGEF7_240-ARHGEF7_264	240	264
2870-1-2-1-10-1	L1_20190826_HS_1023_FU_CL2_5.mgf	12551	4	2826.36	1	NNQSKFFR	5	873	>tr|F5GWX5|F5GWX5_HUMAN Chromodomain-helicase-DNA-binding protein 4 OS=Homo sapiens GN=CHD4 PE=1 SV=1,>tr|A0A0C4DGG9|A0A0C4DGG9_HUMAN Chromodomain-helicase-DNA-binding protein 4 OS=Homo sapiens GN=CHD4 PE=1 SV=1,>sp|Q14839|CHD4_HUMAN Chromodomain-helicase-DNA-binding protein 4 OS=Homo sapiens GN=CHD4 PE=1 SV=2,>sp|Q14839-2|CHD4_HUMAN Isoform 2 of Chromodomain-helicase-DNA-binding protein 4 OS=Hom…	1039.52	8.61358e-10	3.02205e-19	IEELNKTANGNVEAK	6	27	>tr|E7ESY4|E7ESY4_HUMAN Metastasis-associated protein MTA1 OS=Homo sapiens GN=MTA1 PE=1 SV=1,>sp|Q13330-3|MTA1_HUMAN Isoform 3 of Metastasis-associated protein MTA1 OS=Homo sapiens GN=MTA1,>sp|Q13330|MTA1_HUMAN Metastasis-associated protein MTA1 OS=Homo sapiens GN=MTA1 PE=1 SV=2,>sp|Q13330-2|MTA1_HUMAN Isoform Short of Metastasis-associated protein MTA1 OS=Homo sapiens GN=MTA1,>sp|O94776|MTA2_HUM…	1628.84	9.72651e-14	5.16961e-29	>tr|E7ESY4|E7ESY4_HUMAN Metastasis-associated protein MTA1 OS=Homo sapiens GN=MTA1 PE=1 SV=1,>sp|Q13330-3|MTA1_HUMAN Isoform 3 of Metastasis-associated protein MTA1 OS=Homo sapiens GN=MTA1,>sp|Q13330|MTA1_HUMAN Metastasis-associated protein MTA1 OS=Homo sapiens GN=MTA1 PE=1 SV=2,>sp|Q13330-2|MTA1_HUMAN Isoform Short of Metastasis-associated protein MTA1 OS=Homo sapiens GN=MTA1,>sp|O94776|MTA2_HUM…	CHD4	MTA2	>tr|F5GWX5|F5GWX5_HUMAN Chromodomain-helicase-DNA-binding protein 4 OS=Homo sapiens GN=CHD4 PE=1 SV=1	>sp|O94776|MTA2_HUMAN Metastasis-associated protein MTA2 OS=Homo sapiens GN=MTA2 PE=1 SV=1	877	32	1	tr|F5GWX5|F5GWX5_HUMAN	sp|O94776|MTA2_HUMAN	CHD4_877	MTA2_32	NNQSKFFR	IEELNKTANGNVEAK	CHD4_877-MTA2_32	877	32
7719-1-3-1-3-1	L1_20190826_HS_1023_FU_CL2_8.mgf	27616	5	3382.56	1	NLKEGGHR	3	1054	>tr|F5GWX5|F5GWX5_HUMAN Chromodomain-helicase-DNA-binding protein 4 OS=Homo sapiens GN=CHD4 PE=1 SV=1,>tr|A0A0C4DGG9|A0A0C4DGG9_HUMAN Chromodomain-helicase-DNA-binding protein 4 OS=Homo sapiens GN=CHD4 PE=1 SV=1,>sp|Q14839|CHD4_HUMAN Chromodomain-helicase-DNA-binding protein 4 OS=Homo sapiens GN=CHD4 PE=1 SV=2,>sp|Q14839-2|CHD4_HUMAN Isoform 2 of Chromodomain-helicase-DNA-binding protein 4 OS=Hom…	909.478	6.22588e-10	1.00015e-17	MoLDLLEDFLEHEGYKYER	15	1071	>tr|F5GWX5|F5GWX5_HUMAN Chromodomain-helicase-DNA-binding protein 4 OS=Homo sapiens GN=CHD4 PE=1 SV=1,>tr|A0A0C4DGG9|A0A0C4DGG9_HUMAN Chromodomain-helicase-DNA-binding protein 4 OS=Homo sapiens GN=CHD4 PE=1 SV=1,>sp|Q14839|CHD4_HUMAN Chromodomain-helicase-DNA-binding protein 4 OS=Homo sapiens GN=CHD4 PE=1 SV=2,>sp|Q14839-2|CHD4_HUMAN Isoform 2 of Chromodomain-helicase-DNA-binding protein 4 OS=Hom…	2315.08	1.18354e-31	8.39966e-46	>tr|F5GWX5|F5GWX5_HUMAN Chromodomain-helicase-DNA-binding protein 4 OS=Homo sapiens GN=CHD4 PE=1 SV=1,>tr|A0A0C4DGG9|A0A0C4DGG9_HUMAN Chromodomain-helicase-DNA-binding protein 4 OS=Homo sapiens GN=CHD4 PE=1 SV=1,>sp|Q14839|CHD4_HUMAN Chromodomain-helicase-DNA-binding protein 4 OS=Homo sapiens GN=CHD4 PE=1 SV=2,>sp|Q14839-2|CHD4_HUMAN Isoform 2 of Chromodomain-helicase-DNA-binding protein 4 OS=Hom…	CHD4	CHD4	>tr|F5GWX5|F5GWX5_HUMAN Chromodomain-helicase-DNA-binding protein 4 OS=Homo sapiens GN=CHD4 PE=1 SV=1	>tr|F5GWX5|F5GWX5_HUMAN Chromodomain-helicase-DNA-binding protein 4 OS=Homo sapiens GN=CHD4 PE=1 SV=1	1056	13	1	tr|F5GWX5|F5GWX5_HUMAN	tr|F5GWX5|F5GWX5_HUMAN	CHD4_1056	CHD4_13	NLKEGGHR	MoLDLLEDFLEHEGYKYER	CHD4_1056-CHD4_13	1056	13
2783-1-3-1-1-1	L1_20190826_HS_1023_FU_CL2_4.mgf	13685	4	3167.45	1	VQKILIWK	3	495	>tr|F5GWX5|F5GWX5_HUMAN Chromodomain-helicase-DNA-binding protein 4 OS=Homo sapiens GN=CHD4 PE=1 SV=1,>tr|A0A0C4DGG9|A0A0C4DGG9_HUMAN Chromodomain-helicase-DNA-binding protein 4 OS=Homo sapiens GN=CHD4 PE=1 SV=1,>sp|Q14839|CHD4_HUMAN Chromodomain-helicase-DNA-binding protein 4 OS=Homo sapiens GN=CHD4 PE=1 SV=2,>sp|Q14839-2|CHD4_HUMAN Isoform 2 of Chromodomain-helicase-DNA-binding protein 4 OS=Hom…	1026.66	0.000922761	6.28635e-11	KNDMoDEPPSGDFGGDEEK	1	570	>tr|F5GWX5|F5GWX5_HUMAN Chromodomain-helicase-DNA-binding protein 4 OS=Homo sapiens GN=CHD4 PE=1 SV=1,>tr|A0A0C4DGG9|A0A0C4DGG9_HUMAN Chromodomain-helicase-DNA-binding protein 4 OS=Homo sapiens GN=CHD4 PE=1 SV=1,>sp|Q14839|CHD4_HUMAN Chromodomain-helicase-DNA-binding protein 4 OS=Homo sapiens GN=CHD4 PE=1 SV=2,>sp|Q14839-2|CHD4_HUMAN Isoform 2 of Chromodomain-helicase-DNA-binding protein 4 OS=Hom…	1981.78	5.31875e-21	1.27548e-30	>tr|F5GWX5|F5GWX5_HUMAN Chromodomain-helicase-DNA-binding protein 4 OS=Homo sapiens GN=CHD4 PE=1 SV=1,>tr|A0A0C4DGG9|A0A0C4DGG9_HUMAN Chromodomain-helicase-DNA-binding protein 4 OS=Homo sapiens GN=CHD4 PE=1 SV=1,>sp|Q14839|CHD4_HUMAN Chromodomain-helicase-DNA-binding protein 4 OS=Homo sapiens GN=CHD4 PE=1 SV=2,>sp|Q14839-2|CHD4_HUMAN Isoform 2 of Chromodomain-helicase-DNA-binding protein 4 OS=Hom…	CHD4	CHD4	>tr|F5GWX5|F5GWX5_HUMAN Chromodomain-helicase-DNA-binding protein 4 OS=Homo sapiens GN=CHD4 PE=1 SV=1	>tr|F5GWX5|F5GWX5_HUMAN Chromodomain-helicase-DNA-binding protein 4 OS=Homo sapiens GN=CHD4 PE=1 SV=1	-1	497	1	tr|F5GWX5|F5GWX5_HUMAN	tr|F5GWX5|F5GWX5_HUMAN	CHD4_	1	KNDMoDEPPSGDFGGDEEK	VQKILIWK	CHD4_-1-CHD4_497	-1	497
1799-1-2-1-5-1	L1_20190826_HS_1023_FU_CL2_6.mgf	8454	4	2626.27	3	TKDLGHNDK	2	245	>tr|H0YNT2|H0YNT2_HUMAN Transducin-like enhancer protein 3 OS=Homo sapiens GN=TLE3 PE=1 SV=1,>tr|H0YKN8|H0YKN8_HUMAN Transducin-like enhancer protein 3 OS=Homo sapiens GN=TLE3 PE=1 SV=1,>tr|H0YL70|H0YL70_HUMAN Transducin-like enhancer protein 3 OS=Homo sapiens GN=TLE3 PE=1 SV=1,>sp|Q04726|TLE3_HUMAN Transducin-like enhancer protein 3 OS=Homo sapiens GN=TLE3 PE=1 SV=2,>tr|A0A0D9SES8|A0A0D9SES8_HUM…	1026.51	6.70429e-09	8.0549e-17	SSTPGLKSNTPTPR	7	254	>tr|H0YNT2|H0YNT2_HUMAN Transducin-like enhancer protein 3 OS=Homo sapiens GN=TLE3 PE=1 SV=1,>tr|H0YKN8|H0YKN8_HUMAN Transducin-like enhancer protein 3 OS=Homo sapiens GN=TLE3 PE=1 SV=1,>tr|H0YL70|H0YL70_HUMAN Transducin-like enhancer protein 3 OS=Homo sapiens GN=TLE3 PE=1 SV=1,>sp|Q04726|TLE3_HUMAN Transducin-like enhancer protein 3 OS=Homo sapiens GN=TLE3 PE=1 SV=2,>tr|A0A0D9SES8|A0A0D9SES8_HUM…	1441.75	1.937e-21	4.09826e-35	>tr|H0YNT2|H0YNT2_HUMAN Transducin-like enhancer protein 3 OS=Homo sapiens GN=TLE3 PE=1 SV=1,>tr|H0YKN8|H0YKN8_HUMAN Transducin-like enhancer protein 3 OS=Homo sapiens GN=TLE3 PE=1 SV=1,>tr|H0YL70|H0YL70_HUMAN Transducin-like enhancer protein 3 OS=Homo sapiens GN=TLE3 PE=1 SV=1,>sp|Q04726|TLE3_HUMAN Transducin-like enhancer protein 3 OS=Homo sapiens GN=TLE3 PE=1 SV=2,>tr|A0A0D9SES8|A0A0D9SES8_HUM…	TLE3	TLE3	>tr|H0YNT2|H0YNT2_HUMAN Transducin-like enhancer protein 3 OS=Homo sapiens GN=TLE3 PE=1 SV=1	>tr|H0YNT2|H0YNT2_HUMAN Transducin-like enhancer protein 3 OS=Homo sapiens GN=TLE3 PE=1 SV=1	246	260	1	tr|H0YNT2|H0YNT2_HUMAN	tr|H0YNT2|H0YNT2_HUMAN	TLE3_246	TLE3_260	TKDLGHNDK	SSTPGLKSNTPTPR	TLE3_246-TLE3_260	246	260
2585-2-4-1-6-1	L1_20190826_HS_1023_FU_CL2_4.mgf	13031	4	2642.36	1	FVTGNKILR	6	65	>tr|J3KMX5|J3KMX5_HUMAN 40S ribosomal protein S13 OS=Homo sapiens GN=RPS13 PE=1 SV=1,>sp|P62277|RS13_HUMAN 40S ribosomal protein S13 OS=Homo sapiens GN=RPS13 PE=1 SV=2	1046.62	2.16729e-07	4.82537e-19	LTSDDVKEQIYK	7	28	>tr|J3KMX5|J3KMX5_HUMAN 40S ribosomal protein S13 OS=Homo sapiens GN=RPS13 PE=1 SV=1,>sp|P62277|RS13_HUMAN 40S ribosomal protein S13 OS=Homo sapiens GN=RPS13 PE=1 SV=2	1437.74	8.92177e-05	1.15251e-17	>tr|J3KMX5|J3KMX5_HUMAN 40S ribosomal protein S13 OS=Homo sapiens GN=RPS13 PE=1 SV=1,>sp|P62277|RS13_HUMAN 40S ribosomal protein S13 OS=Homo sapiens GN=RPS13 PE=1 SV=2-34->tr|J3KMX5|J3KMX5_HUMAN 40S ribosomal protein S13 OS=Homo sapiens GN=RPS13 PE=1 SV=1,>sp|P62277|RS13_HUMAN 40S ribosomal protein S13 OS=Homo sapiens GN=RPS13 PE=1 SV=2-70	RPS13	RPS13	>tr|J3KMX5|J3KMX5_HUMAN 40S ribosomal protein S13 OS=Homo sapiens GN=RPS13 PE=1 SV=1	>tr|J3KMX5|J3KMX5_HUMAN 40S ribosomal protein S13 OS=Homo sapiens GN=RPS13 PE=1 SV=1	34	70	1	tr|J3KMX5|J3KMX5_HUMAN	tr|J3KMX5|J3KMX5_HUMAN	RPS13_34	RPS13_70	LTSDDVKEQIYK	FVTGNKILR	RPS13_34-RPS13_70	34	70
2729-1-10-1-12-1	L1_20190826_HS_1023_FU_CL2_5.mgf	12090	4	3109.59	1	VNVGAGSHPNKVK	11	761	>tr|Q5HY54|Q5HY54_HUMAN Filamin-A OS=Homo sapiens GN=FLNA PE=1 SV=1,>tr|Q60FE5|Q60FE5_HUMAN Filamin A OS=Homo sapiens GN=FLNA PE=1 SV=1,>sp|P21333-2|FLNA_HUMAN Isoform 2 of Filamin-A OS=Homo sapiens GN=FLNA,>sp|P21333|FLNA_HUMAN Filamin-A OS=Homo sapiens GN=FLNA PE=1 SV=4,>tr|A0A087WWY3|A0A087WWY3_HUMAN Filamin-A OS=Homo sapiens GN=FLNA PE=1 SV=1	1305.72	2.55758e-06	2.2324e-21	TGVAVNKPAEFTVDAK	7	685	>tr|Q5HY54|Q5HY54_HUMAN Filamin-A OS=Homo sapiens GN=FLNA PE=1 SV=1,>tr|Q60FE5|Q60FE5_HUMAN Filamin A OS=Homo sapiens GN=FLNA PE=1 SV=1,>sp|P21333-2|FLNA_HUMAN Isoform 2 of Filamin-A OS=Homo sapiens GN=FLNA,>sp|P21333|FLNA_HUMAN Filamin-A OS=Homo sapiens GN=FLNA PE=1 SV=4,>tr|A0A087WWY3|A0A087WWY3_HUMAN Filamin-A OS=Homo sapiens GN=FLNA PE=1 SV=1	1645.87	2.33058e-19	6.51833e-38	>tr|Q5HY54|Q5HY54_HUMAN Filamin-A OS=Homo sapiens GN=FLNA PE=1 SV=1,>tr|Q60FE5|Q60FE5_HUMAN Filamin A OS=Homo sapiens GN=FLNA PE=1 SV=1,>sp|P21333-2|FLNA_HUMAN Isoform 2 of Filamin-A OS=Homo sapiens GN=FLNA,>sp|P21333|FLNA_HUMAN Filamin-A OS=Homo sapiens GN=FLNA PE=1 SV=4,>tr|A0A087WWY3|A0A087WWY3_HUMAN Filamin-A OS=Homo sapiens GN=FLNA PE=1 SV=1-691->tr|Q5HY54|Q5HY54_HUMAN Filamin-A OS=Homo sapi…	FLNA	FLNA	>tr|Q5HY54|Q5HY54_HUMAN Filamin-A OS=Homo sapiens GN=FLNA PE=1 SV=1	>tr|Q5HY54|Q5HY54_HUMAN Filamin-A OS=Homo sapiens GN=FLNA PE=1 SV=1	691	771	1	tr|Q5HY54|Q5HY54_HUMAN	tr|Q5HY54|Q5HY54_HUMAN	FLNA_691	FLNA_771	TGVAVNKPAEFTVDAK	VNVGAGSHPNKVK	FLNA_691-FLNA_771	691	771

## Sheet: BR1
index	file_name	scan	charge	precursor_mass	spectra_num	peptide_a	xl_a	pep_pos_a	protein_a	mass_a	n_score_a	n_score_a_MS2_MS3	peptide_b	xl_b	pep_pos_b	protein_b	mass_b	n_score_b	n_score_b_MS2_MS3	peptide_a_b	gene_a	gene_b	protein_a_cln	protein_b_cln	LinkPos1	LinkPos2	shared_seq	length_protein_a	length_protein_b	Protein1	Protein2	pro_site_a	pro_site_b	pro_site_ab	protein_a_b	target_decoy	FDR_cutoff
150-1-16-1-18-1	F1_20200821_HS_1090_FU_1_A11.mgf	24503	4	2451.22	1	KDEEVLK	1	155	>sp|O00148|DX39A_HUMAN ATP-dependent RNA helicase DDX39A OS=Homo sapiens OX=9606 GN=DDX39A PE=1 SV=2,>sp|Q13838|DX39B_HUMAN Spliceosome RNA helicase DDX39B OS=Homo sapiens OX=9606 GN=DDX39B PE=1 SV=1	859.465	1.0235e-12	4.51038e-17	KNCPHIVVGTPGR	1	163	>sp|Q13838|DX39B_HUMAN Spliceosome RNA helicase DDX39B OS=Homo sapiens OX=9606 GN=DDX39B PE=1 SV=1	1433.76	4.08045e-32	8.60646e-58	KDEEVLK-1-KNCPHIVVGTPGR-1	DDX39B	DDX39B	>sp|Q13838|DX39B_HUMAN Spliceosome RNA helicase DDX39B OS=Homo sapiens OX=9606 GN=DDX39B PE=1 SV=1	>sp|Q13838|DX39B_HUMAN Spliceosome RNA helicase DDX39B OS=Homo sapiens OX=9606 GN=DDX39B PE=1 SV=1	156	163	1	428	428	sp|Q13838|DDX39B	sp|Q13838|DDX39B	DDX39B_156	DDX39B_163	DDX39B-156-DDX39B-163	>sp|O00148|DX39A_HUMAN ATP-dependent RNA helicase DDX39A OS=Homo sapiens OX=9606 GN=DDX39A PE=1 SV=2,>sp|Q13838|DX39B_HUMAN Spliceosome RNA helicase DDX39B OS=Homo sapiens OX=9606 GN=DDX39B PE=1 SV=1-155->sp|Q13838|DX39B_HUMAN Spliceosome RNA helicase DDX39B OS=Homo sapiens OX=9606 GN=DDX39B PE=1 SV=1-163	target	1
282-1-1-1-1-1	F1_20200821_HS_1090_FU_1_B1.mgf	9335	4	1647.87	1	GAKSVR	3	164	>sp|O14818|PSA7_HUMAN Proteasome subunit alpha type-7 OS=Homo sapiens OX=9606 GN=PSMA7 PE=1 SV=1	616.366	7.04346e-09	5.54164e-15	KGSTAVGVR	1	28	>sp|O14818|PSA7_HUMAN Proteasome subunit alpha type-7 OS=Homo sapiens OX=9606 GN=PSMA7 PE=1 SV=1	873.503	1.23137e-18	1.23137e-18	GAKSVR-3-KGSTAVGVR-1	PSMA7	PSMA7	>sp|O14818|PSA7_HUMAN Proteasome subunit alpha type-7 OS=Homo sapiens OX=9606 GN=PSMA7 PE=1 SV=1	>sp|O14818|PSA7_HUMAN Proteasome subunit alpha type-7 OS=Homo sapiens OX=9606 GN=PSMA7 PE=1 SV=1	166	28	0	248	248	sp|O14818|PSMA7	sp|O14818|PSMA7	PSMA7_166	PSMA7_28	PSMA7-166-PSMA7-28	>sp|O14818|PSA7_HUMAN Proteasome subunit alpha type-7 OS=Homo sapiens OX=9606 GN=PSMA7 PE=1 SV=1-166->sp|O14818|PSA7_HUMAN Proteasome subunit alpha type-7 OS=Homo sapiens OX=9606 GN=PSMA7 PE=1 SV=1-28	target	1
287-1-1-1-1-1	F1_20200821_HS_1090_FU_1_A12.mgf	17548	4	2076.06	1	KGSTAVGVR	1	28	>sp|O14818|PSA7_HUMAN Proteasome subunit alpha type-7 OS=Homo sapiens OX=9606 GN=PSMA7 PE=1 SV=1	873.503	2.68197e-22	6.99599e-34	SVAKLQDER	4	49	>sp|O14818|PSA7_HUMAN Proteasome subunit alpha type-7 OS=Homo sapiens OX=9606 GN=PSMA7 PE=1 SV=1	1044.56	2.68197e-22	9.71152e-30	KGSTAVGVR-1-SVAKLQDER-4	PSMA7	PSMA7	>sp|O14818|PSA7_HUMAN Proteasome subunit alpha type-7 OS=Homo sapiens OX=9606 GN=PSMA7 PE=1 SV=1	>sp|O14818|PSA7_HUMAN Proteasome subunit alpha type-7 OS=Homo sapiens OX=9606 GN=PSMA7 PE=1 SV=1	28	52	0	248	248	sp|O14818|PSMA7	sp|O14818|PSMA7	PSMA7_28	PSMA7_52	PSMA7-28-PSMA7-52	>sp|O14818|PSA7_HUMAN Proteasome subunit alpha type-7 OS=Homo sapiens OX=9606 GN=PSMA7 PE=1 SV=1-28->sp|O14818|PSA7_HUMAN Proteasome subunit alpha type-7 OS=Homo sapiens OX=9606 GN=PSMA7 PE=1 SV=1-52	target	1
258-1-1-1-2-1	F1_20200821_HS_1090_FU_1_A10.mgf	35829	5	3544.86	1	TSSGDASSLSIEETNKLR	16	110	>sp|O43290|SNUT1_HUMAN U4/U6.U5 tri-snRNP-associated protein 1 OS=Homo sapiens OX=9606 GN=SART1 PE=1 SV=1	1893.93	2.00446e-58	2.00446e-58	AKLGLKPLEVNAIK	2	128	>sp|O43290|SNUT1_HUMAN U4/U6.U5 tri-snRNP-associated protein 1 OS=Homo sapiens OX=9606 GN=SART1 PE=1 SV=1	1492.93	1.63911e-30	9.57955e-52	AKLGLKPLEVNAIK-2-TSSGDASSLSIEETNKLR-16	SART1	SART1	>sp|O43290|SNUT1_HUMAN U4/U6.U5 tri-snRNP-associated protein 1 OS=Homo sapiens OX=9606 GN=SART1 PE=1 SV=1	>sp|O43290|SNUT1_HUMAN U4/U6.U5 tri-snRNP-associated protein 1 OS=Homo sapiens OX=9606 GN=SART1 PE=1 SV=1	125	129	0	800	800	sp|O43290|SART1	sp|O43290|SART1	SART1_125	SART1_129	SART1-125-SART1-129	>sp|O43290|SNUT1_HUMAN U4/U6.U5 tri-snRNP-associated protein 1 OS=Homo sapiens OX=9606 GN=SART1 PE=1 SV=1-125->sp|O43290|SNUT1_HUMAN U4/U6.U5 tri-snRNP-associated protein 1 OS=Homo sapiens OX=9606 GN=SART1 PE=1 SV=1-129	target	1
123-2-4-1-1-1	F1_20200821_HS_1090_FU_1_A10.mgf	24790	5	2508.47	1	AKLGLKPLEVNAIKK	2	128	>sp|O43290|SNUT1_HUMAN U4/U6.U5 tri-snRNP-associated protein 1 OS=Homo sapiens OX=9606 GN=SART1 PE=1 SV=1	1621.03	4.00209e-46	7.64922e-54	LAAAKEK	5	171	>sp|O43290|SNUT1_HUMAN U4/U6.U5 tri-snRNP-associated protein 1 OS=Homo sapiens OX=9606 GN=SART1 PE=1 SV=1	729.438	8.06102e-18	8.06102e-18	LAAAKEK-5-AKLGLKPLEVNAIKK-2	SART1	SART1	>sp|O43290|SNUT1_HUMAN U4/U6.U5 tri-snRNP-associated protein 1 OS=Homo sapiens OX=9606 GN=SART1 PE=1 SV=1	>sp|O43290|SNUT1_HUMAN U4/U6.U5 tri-snRNP-associated protein 1 OS=Homo sapiens OX=9606 GN=SART1 PE=1 SV=1	129	175	0	800	800	sp|O43290|SART1	sp|O43290|SART1	SART1_129	SART1_175	SART1-129-SART1-175	>sp|O43290|SNUT1_HUMAN U4/U6.U5 tri-snRNP-associated protein 1 OS=Homo sapiens OX=9606 GN=SART1 PE=1 SV=1-129->sp|O43290|SNUT1_HUMAN U4/U6.U5 tri-snRNP-associated protein 1 OS=Homo sapiens OX=9606 GN=SART1 PE=1 SV=1-175	target	1
341-1-1-1-1-1	F1_20200821_HS_1090_FU_1_A10.mgf	23956	6	3305.73	1	AKLGLKPLEVNAIKK	2	128	>sp|O43290|SNUT1_HUMAN U4/U6.U5 tri-snRNP-associated protein 1 OS=Homo sapiens OX=9606 GN=SART1 PE=1 SV=1	1621.03	8.38379e-30	3.03581e-37	EKRDDGYEAAASSK	2	96	>sp|O43290|SNUT1_HUMAN U4/U6.U5 tri-snRNP-associated protein 1 OS=Homo sapiens OX=9606 GN=SART1 PE=1 SV=1	1525.7	2.79161e-30	2.79161e-30	EKRDDGYEAAASSK-2-AKLGLKPLEVNAIKK-2	SART1	SART1	>sp|O43290|SNUT1_HUMAN U4/U6.U5 tri-snRNP-associated protein 1 OS=Homo sapiens OX=9606 GN=SART1 PE=1 SV=1	>sp|O43290|SNUT1_HUMAN U4/U6.U5 tri-snRNP-associated protein 1 OS=Homo sapiens OX=9606 GN=SART1 PE=1 SV=1	129	97	0	800	800	sp|O43290|SART1	sp|O43290|SART1	SART1_129	SART1_97	SART1-129-SART1-97	>sp|O43290|SNUT1_HUMAN U4/U6.U5 tri-snRNP-associated protein 1 OS=Homo sapiens OX=9606 GN=SART1 PE=1 SV=1-129->sp|O43290|SNUT1_HUMAN U4/U6.U5 tri-snRNP-associated protein 1 OS=Homo sapiens OX=9606 GN=SART1 PE=1 SV=1-97	target	1
145-1-2-1-1-1	F1_20200821_HS_1090_FU_1_A9.mgf	38923	4	3720.98	1	LGLKPLEVNAIKK	12	130	>sp|O43290|SNUT1_HUMAN U4/U6.U5 tri-snRNP-associated protein 1 OS=Homo sapiens OX=9606 GN=SART1 PE=1 SV=1	1421.9	0.000650678	2.18856e-12	EAGTKEEPVTADVINPMALR	5	143	>sp|O43290|SNUT1_HUMAN U4/U6.U5 tri-snRNP-associated protein 1 OS=Homo sapiens OX=9606 GN=SART1 PE=1 SV=1	2140.08	1.17953e-18	1.17953e-18	LGLKPLEVNAIKK-12-EAGTKEEPVTADVINPMALR-5	SART1	SART1	>sp|O43290|SNUT1_HUMAN U4/U6.U5 tri-snRNP-associated protein 1 OS=Homo sapiens OX=9606 GN=SART1 PE=1 SV=1	>sp|O43290|SNUT1_HUMAN U4/U6.U5 tri-snRNP-associated protein 1 OS=Homo sapiens OX=9606 GN=SART1 PE=1 SV=1	141	147	0	800	800	sp|O43290|SART1	sp|O43290|SART1	SART1_141	SART1_147	SART1-141-SART1-147	>sp|O43290|SNUT1_HUMAN U4/U6.U5 tri-snRNP-associated protein 1 OS=Homo sapiens OX=9606 GN=SART1 PE=1 SV=1-141->sp|O43290|SNUT1_HUMAN U4/U6.U5 tri-snRNP-associated protein 1 OS=Homo sapiens OX=9606 GN=SART1 PE=1 SV=1-147	target	1
388-1-4-1-1-1	F1_20200821_HS_1090_FU_1_A12.mgf	19537	4	1800.01	1	LAAAKEK	5	171	>sp|O43290|SNUT1_HUMAN U4/U6.U5 tri-snRNP-associated protein 1 OS=Homo sapiens OX=9606 GN=SART1 PE=1 SV=1	729.438	9.15743e-20	1.12646e-25	LLNQKLGK	5	179	>sp|O43290|SNUT1_HUMAN U4/U6.U5 tri-snRNP-associated protein 1 OS=Homo sapiens OX=9606 GN=SART1 PE=1 SV=1	912.576	1.82111e-21	4.98626e-26	LAAAKEK-5-LLNQKLGK-5	SART1	SART1	>sp|O43290|SNUT1_HUMAN U4/U6.U5 tri-snRNP-associated protein 1 OS=Homo sapiens OX=9606 GN=SART1 PE=1 SV=1	>sp|O43290|SNUT1_HUMAN U4/U6.U5 tri-snRNP-associated protein 1 OS=Homo sapiens OX=9606 GN=SART1 PE=1 SV=1	175	183	0	800	800	sp|O43290|SART1	sp|O43290|SART1	SART1_175	SART1_183	SART1-175-SART1-183	>sp|O43290|SNUT1_HUMAN U4/U6.U5 tri-snRNP-associated protein 1 OS=Homo sapiens OX=9606 GN=SART1 PE=1 SV=1-175->sp|O43290|SNUT1_HUMAN U4/U6.U5 tri-snRNP-associated protein 1 OS=Homo sapiens OX=9606 GN=SART1 PE=1 SV=1-183	target	1
142-1-1-1-2-1	F1_20200821_HS_1090_FU_1_A11.mgf	35375	4	2492.24	1	EGETMILTLKDK	10	268	>sp|O43290|SNUT1_HUMAN U4/U6.U5 tri-snRNP-associated protein 1 OS=Homo sapiens OX=9606 GN=SART1 PE=1 SV=1	1376.72	2.27422e-33	2.27422e-33	AEKNVELR	3	300	>sp|O43290|SNUT1_HUMAN U4/U6.U5 tri-snRNP-associated protein 1 OS=Homo sapiens OX=9606 GN=SART1 PE=1 SV=1	957.524	1.77276e-09	2.5098e-21	AEKNVELR-3-EGETMILTLKDK-10	SART1	SART1	>sp|O43290|SNUT1_HUMAN U4/U6.U5 tri-snRNP-associated protein 1 OS=Homo sapiens OX=9606 GN=SART1 PE=1 SV=1	>sp|O43290|SNUT1_HUMAN U4/U6.U5 tri-snRNP-associated protein 1 OS=Homo sapiens OX=9606 GN=SART1 PE=1 SV=1	277	302	0	800	800	sp|O43290|SART1	sp|O43290|SART1	SART1_277	SART1_302	SART1-277-SART1-302	>sp|O43290|SNUT1_HUMAN U4/U6.U5 tri-snRNP-associated protein 1 OS=Homo sapiens OX=9606 GN=SART1 PE=1 SV=1-277->sp|O43290|SNUT1_HUMAN U4/U6.U5 tri-snRNP-associated protein 1 OS=Homo sapiens OX=9606 GN=SART1 PE=1 SV=1-302	target	1
356-1-1-1-2-1	F1_20200821_HS_1090_FU_1_A10.mgf	42715	4	3653.84	1	DKGVLQEEEDVLVNVNLVDKER	20	278	>sp|O43290|SNUT1_HUMAN U4/U6.U5 tri-snRNP-associated protein 1 OS=Homo sapiens OX=9606 GN=SART1 PE=1 SV=1	2539.31	2.7118e-35	1.11969e-50	AEKNVELR	3	300	>sp|O43290|SNUT1_HUMAN U4/U6.U5 tri-snRNP-associated protein 1 OS=Homo sapiens OX=9606 GN=SART1 PE=1 SV=1	957.524	6.11288e-09	1.38142e-21	AEKNVELR-3-DKGVLQEEEDVLVNVNLVDKER-20	SART1	SART1	>sp|O43290|SNUT1_HUMAN U4/U6.U5 tri-snRNP-associated protein 1 OS=Homo sapiens OX=9606 GN=SART1 PE=1 SV=1	>sp|O43290|SNUT1_HUMAN U4/U6.U5 tri-snRNP-associated protein 1 OS=Homo sapiens OX=9606 GN=SART1 PE=1 SV=1	297	302	0	800	800	sp|O43290|SART1	sp|O43290|SART1	SART1_297	SART1_302	SART1-297-SART1-302	>sp|O43290|SNUT1_HUMAN U4/U6.U5 tri-snRNP-associated protein 1 OS=Homo sapiens OX=9606 GN=SART1 PE=1 SV=1-297->sp|O43290|SNUT1_HUMAN U4/U6.U5 tri-snRNP-associated protein 1 OS=Homo sapiens OX=9606 GN=SART1 PE=1 SV=1-302	target	1
461-1-1-1-1-1	F1_20200821_HS_1090_FU_1_A9.mgf	25325	5	3820.86	1	AEKNVELR	3	300	>sp|O43290|SNUT1_HUMAN U4/U6.U5 tri-snRNP-associated protein 1 OS=Homo sapiens OX=9606 GN=SART1 PE=1 SV=1	957.524	5.25766e-19	5.25766e-19	KKPDYLPYAEDESVDDLAQQKPR	1	309	>sp|O43290|SNUT1_HUMAN U4/U6.U5 tri-snRNP-associated protein 1 OS=Homo sapiens OX=9606 GN=SART1 PE=1 SV=1	2704.33	3.81695e-58	3.81695e-58	AEKNVELR-3-KKPDYLPYAEDESVDDLAQQKPR-1	SART1	SART1	>sp|O43290|SNUT1_HUMAN U4/U6.U5 tri-snRNP-associated protein 1 OS=Homo sapiens OX=9606 GN=SART1 PE=1 SV=1	>sp|O43290|SNUT1_HUMAN U4/U6.U5 tri-snRNP-associated protein 1 OS=Homo sapiens OX=9606 GN=SART1 PE=1 SV=1	302	309	0	800	800	sp|O43290|SART1	sp|O43290|SART1	SART1_302	SART1_309	SART1-302-SART1-309	>sp|O43290|SNUT1_HUMAN U4/U6.U5 tri-snRNP-associated protein 1 OS=Homo sapiens OX=9606 GN=SART1 PE=1 SV=1-302->sp|O43290|SNUT1_HUMAN U4/U6.U5 tri-snRNP-associated protein 1 OS=Homo sapiens OX=9606 GN=SART1 PE=1 SV=1-309	target	1
267-1-1-1-3-1	F1_20200821_HS_1090_FU_1_A10.mgf	31204	5	3691.77	1	AEKNVELR	3	300	>sp|O43290|SNUT1_HUMAN U4/U6.U5 tri-snRNP-associated protein 1 OS=Homo sapiens OX=9606 GN=SART1 PE=1 SV=1	957.524	3.42654e-16	7.48956e-25	KPDYLPYAEDESVDDLAQQKPR	1	310	>sp|O43290|SNUT1_HUMAN U4/U6.U5 tri-snRNP-associated protein 1 OS=Homo sapiens OX=9606 GN=SART1 PE=1 SV=1	2576.24	2.56816e-59	1.2986e-63	AEKNVELR-3-KPDYLPYAEDESVDDLAQQKPR-1	SART1	SART1	>sp|O43290|SNUT1_HUMAN U4/U6.U5 tri-snRNP-associated protein 1 OS=Homo sapiens OX=9606 GN=SART1 PE=1 SV=1	>sp|O43290|SNUT1_HUMAN U4/U6.U5 tri-snRNP-associated protein 1 OS=Homo sapiens OX=9606 GN=SART1 PE=1 SV=1	302	310	0	800	800	sp|O43290|SART1	sp|O43290|SART1	SART1_302	SART1_310	SART1-302-SART1-310	>sp|O43290|SNUT1_HUMAN U4/U6.U5 tri-snRNP-associated protein 1 OS=Homo sapiens OX=9606 GN=SART1 PE=1 SV=1-302->sp|O43290|SNUT1_HUMAN U4/U6.U5 tri-snRNP-associated protein 1 OS=Homo sapiens OX=9606 GN=SART1 PE=1 SV=1-310	target	1
63-1-1-1-1-1	F1_20200821_HS_1090_FU_1_A11.mgf	44580	5	4355.09	1	SILSKYDEELEGERPHSFR	5	332	>sp|O43290|SNUT1_HUMAN U4/U6.U5 tri-snRNP-associated protein 1 OS=Homo sapiens OX=9606 GN=SART1 PE=1 SV=1	2291.12	3.65775e-18	3.65775e-18	FLHCTEKDLIPYLEK	7	1589	>sp|O75643|U520_HUMAN U5 small nuclear ribonucleoprotein 200 kDa helicase OS=Homo sapiens OX=9606 GN=SNRNP200 PE=1 SV=2	1904.97	2.25473e-35	5.51669e-46	FLHCTEKDLIPYLEK-7-SILSKYDEELEGERPHSFR-5	SART1	SNRNP200	>sp|O43290|SNUT1_HUMAN U4/U6.U5 tri-snRNP-associated protein 1 OS=Homo sapiens OX=9606 GN=SART1 PE=1 SV=1	>sp|O75643|U520_HUMAN U5 small nuclear ribonucleoprotein 200 kDa helicase OS=Homo sapiens OX=9606 GN=SNRNP200 PE=1 SV=2	336	1595	0	800	2136	sp|O43290|SART1	sp|O75643|SNRNP200	SART1_336	SNRNP200_1595	SART1-336-SNRNP200-1595	>sp|O43290|SNUT1_HUMAN U4/U6.U5 tri-snRNP-associated protein 1 OS=Homo sapiens OX=9606 GN=SART1 PE=1 SV=1-336->sp|O75643|U520_HUMAN U5 small nuclear ribonucleoprotein 200 kDa helicase OS=Homo sapiens OX=9606 GN=SNRNP200 PE=1 SV=2-1595	target	1
488-1-1-1-4-1	F1_20200821_HS_1090_FU_1_A10.mgf	36558	4	3310.71	1	VVEIVKK	6	525	>sp|O43290|SNUT1_HUMAN U4/U6.U5 tri-snRNP-associated protein 1 OS=Homo sapiens OX=9606 GN=SART1 PE=1 SV=1	813.532	1.16839e-21	1.16839e-21	SPTLYGISHDDLKGDPLLDQR	13	932	>sp|O75643|U520_HUMAN U5 small nuclear ribonucleoprotein 200 kDa helicase OS=Homo sapiens OX=9606 GN=SNRNP200 PE=1 SV=2	2339.18	1.08588e-54	4.95047e-73	VVEIVKK-6-SPTLYGISHDDLKGDPLLDQR-13	SART1	SNRNP200	>sp|O43290|SNUT1_HUMAN U4/U6.U5 tri-snRNP-associated protein 1 OS=Homo sapiens OX=9606 GN=SART1 PE=1 SV=1	>sp|O75643|U520_HUMAN U5 small nuclear ribonucleoprotein 200 kDa helicase OS=Homo sapiens OX=9606 GN=SNRNP200 PE=1 SV=2	530	944	0	800	2136	sp|O43290|SART1	sp|O75643|SNRNP200	SART1_530	SNRNP200_944	SART1-530-SNRNP200-944	>sp|O43290|SNUT1_HUMAN U4/U6.U5 tri-snRNP-associated protein 1 OS=Homo sapiens OX=9606 GN=SART1 PE=1 SV=1-530->sp|O75643|U520_HUMAN U5 small nuclear ribonucleoprotein 200 kDa helicase OS=Homo sapiens OX=9606 GN=SNRNP200 PE=1 SV=2-944	target	1
422-1-1-1-4-1	F1_20200821_HS_1090_FU_1_A10.mgf	42920	4	3654.86	1	MoSSSDTPLGTVALLQEKQK	17	759	>sp|O43290|SNUT1_HUMAN U4/U6.U5 tri-snRNP-associated protein 1 OS=Homo sapiens OX=9606 GN=SART1 PE=1 SV=1	2048.05	6.94275e-20	3.09109e-29	AQKTPYIVLSGSGK	3	778	>sp|O43290|SNUT1_HUMAN U4/U6.U5 tri-snRNP-associated protein 1 OS=Homo sapiens OX=9606 GN=SART1 PE=1 SV=1	1447.8	6.9395e-22	2.84453e-33	AQKTPYIVLSGSGK-3-MoSSSDTPLGTVALLQEKQK-17	SART1	SART1	>sp|O43290|SNUT1_HUMAN U4/U6.U5 tri-snRNP-associated protein 1 OS=Homo sapiens OX=9606 GN=SART1 PE=1 SV=1	>sp|O43290|SNUT1_HUMAN U4/U6.U5 tri-snRNP-associated protein 1 OS=Homo sapiens OX=9606 GN=SART1 PE=1 SV=1	775	780	0	800	800	sp|O43290|SART1	sp|O43290|SART1	SART1_775	SART1_780	SART1-775-SART1-780	>sp|O43290|SNUT1_HUMAN U4/U6.U5 tri-snRNP-associated protein 1 OS=Homo sapiens OX=9606 GN=SART1 PE=1 SV=1-775->sp|O43290|SNUT1_HUMAN U4/U6.U5 tri-snRNP-associated protein 1 OS=Homo sapiens OX=9606 GN=SART1 PE=1 SV=1-780	target	1
11-1-2-1-7-1	F1_20200821_HS_1090_FU_1_A12.mgf	7143	4	2485.2	1	VQTEKEEKEEAR	8	446	>sp|O75400|PR40A_HUMAN Pre-mRNA-processing factor 40 homolog A OS=Homo sapiens OX=9606 GN=PRPF40A PE=1 SV=2	1474.73	1.64457e-21	1.00007e-39	SKYKEAK	4	458	>sp|O75400|PR40A_HUMAN Pre-mRNA-processing factor 40 homolog A OS=Homo sapiens OX=9606 GN=PRPF40A PE=1 SV=2	852.471	2.48798e-06	1.69589e-15	SKYKEAK-4-VQTEKEEKEEAR-8	PRPF40A	PRPF40A	>sp|O75400|PR40A_HUMAN Pre-mRNA-processing factor 40 homolog A OS=Homo sapiens OX=9606 GN=PRPF40A PE=1 SV=2	>sp|O75400|PR40A_HUMAN Pre-mRNA-processing factor 40 homolog A OS=Homo sapiens OX=9606 GN=PRPF40A PE=1 SV=2	453	461	0	957	957	sp|O75400|PRPF40A	sp|O75400|PRPF40A	PRPF40A_453	PRPF40A_461	PRPF40A-453-PRPF40A-461	>sp|O75400|PR40A_HUMAN Pre-mRNA-processing factor 40 homolog A OS=Homo sapiens OX=9606 GN=PRPF40A PE=1 SV=2-453->sp|O75400|PR40A_HUMAN Pre-mRNA-processing factor 40 homolog A OS=Homo sapiens OX=9606 GN=PRPF40A PE=1 SV=2-461	target	1
227-1-5-1-94-1	F1_20200821_HS_1090_FU_1_A9.mgf	45981	4	5349.73	1	IASHYYITNDTVQTYNQLLKPTLSEIELFR	20	987	>sp|O75643|U520_HUMAN U5 small nuclear ribonucleoprotein 200 kDa helicase OS=Homo sapiens OX=9606 GN=SNRNP200 PE=1 SV=2	3569.84	1.26048e-56	1.64771e-77	VPIPVKESIEEPSAK	6	1044	>sp|O75643|U520_HUMAN U5 small nuclear ribonucleoprotein 200 kDa helicase OS=Homo sapiens OX=9606 GN=SNRNP200 PE=1 SV=2	1621.89	9.29015e-45	5.55388e-68	VPIPVKESIEEPSAK-6-IASHYYITNDTVQTYNQLLKPTLSEIELFR-20	SNRNP200	SNRNP200	>sp|O75643|U520_HUMAN U5 small nuclear ribonucleoprotein 200 kDa helicase OS=Homo sapiens OX=9606 GN=SNRNP200 PE=1 SV=2	>sp|O75643|U520_HUMAN U5 small nuclear ribonucleoprotein 200 kDa helicase OS=Homo sapiens OX=9606 GN=SNRNP200 PE=1 SV=2	1006	1049	0	2136	2136	sp|O75643|SNRNP200	sp|O75643|SNRNP200	SNRNP200_1006	SNRNP200_1049	SNRNP200-1006-SNRNP200-1049	>sp|O75643|U520_HUMAN U5 small nuclear ribonucleoprotein 200 kDa helicase OS=Homo sapiens OX=9606 GN=SNRNP200 PE=1 SV=2-1006->sp|O75643|U520_HUMAN U5 small nuclear ribonucleoprotein 200 kDa helicase OS=Homo sapiens OX=9606 GN=SNRNP200 PE=1 SV=2-1049	target	1
50-1-1-1-3-1	F1_20200821_HS_1090_FU_1_A11.mgf	25749	4	3286.6	1	NITVREEEKLELQK	9	1026	>sp|O75643|U520_HUMAN U5 small nuclear ribonucleoprotein 200 kDa helicase OS=Homo sapiens OX=9606 GN=SNRNP200 PE=1 SV=2	1727.94	1.62644e-08	7.61076e-17	DEDRHDINKMK	9	75	>sp|O75643|U520_HUMAN U5 small nuclear ribonucleoprotein 200 kDa helicase OS=Homo sapiens OX=9606 GN=SNRNP200 PE=1 SV=2	1399.65	1	4.56803e-19	DEDRHDINKMK-9-NITVREEEKLELQK-9	SNRNP200	SNRNP200	>sp|O75643|U520_HUMAN U5 small nuclear ribonucleoprotein 200 kDa helicase OS=Homo sapiens OX=9606 GN=SNRNP200 PE=1 SV=2	>sp|O75643|U520_HUMAN U5 small nuclear ribonucleoprotein 200 kDa helicase OS=Homo sapiens OX=9606 GN=SNRNP200 PE=1 SV=2	1034	83	0	2136	2136	sp|O75643|SNRNP200	sp|O75643|SNRNP200	SNRNP200_1034	SNRNP200_83	SNRNP200-1034-SNRNP200-83	>sp|O75643|U520_HUMAN U5 small nuclear ribonucleoprotein 200 kDa helicase OS=Homo sapiens OX=9606 GN=SNRNP200 PE=1 SV=2-1034->sp|O75643|U520_HUMAN U5 small nuclear ribonucleoprotein 200 kDa helicase OS=Homo sapiens OX=9606 GN=SNRNP200 PE=1 SV=2-83	target	1
181-1-2-1-54-1	F1_20200821_HS_1090_FU_1_A8.mgf	33721	5	5340.78	1	EEEKLELQKLLER	9	1031	>sp|O75643|U520_HUMAN U5 small nuclear ribonucleoprotein 200 kDa helicase OS=Homo sapiens OX=9606 GN=SNRNP200 PE=1 SV=2	1655.91	3.57642e-22	8.95329e-34	INVLLQAFISQLKLEGFALMADMVYVTQSAGR	13	1059	>sp|O75643|U520_HUMAN U5 small nuclear ribonucleoprotein 200 kDa helicase OS=Homo sapiens OX=9606 GN=SNRNP200 PE=1 SV=2	3525.87	1.22958e-57	1.22958e-57	EEEKLELQKLLER-9-INVLLQAFISQLKLEGFALMADMVYVTQSAGR-13	SNRNP200	SNRNP200	>sp|O75643|U520_HUMAN U5 small nuclear ribonucleoprotein 200 kDa helicase OS=Homo sapiens OX=9606 GN=SNRNP200 PE=1 SV=2	>sp|O75643|U520_HUMAN U5 small nuclear ribonucleoprotein 200 kDa helicase OS=Homo sapiens OX=9606 GN=SNRNP200 PE=1 SV=2	1039	1071	0	2136	2136	sp|O75643|SNRNP200	sp|O75643|SNRNP200	SNRNP200_1039	SNRNP200_1071	SNRNP200-1039-SNRNP200-1071	>sp|O75643|U520_HUMAN U5 small nuclear ribonucleoprotein 200 kDa helicase OS=Homo sapiens OX=9606 GN=SNRNP200 PE=1 SV=2-1039->sp|O75643|U520_HUMAN U5 small nuclear ribonucleoprotein 200 kDa helicase OS=Homo sapiens OX=9606 GN=SNRNP200 PE=1 SV=2-1071	target	1
438-1-2-1-3-1	F1_20200821_HS_1090_FU_1_A11.mgf	31539	4	2480.34	1	KLPEEVVK	1	1134	>sp|O75643|U520_HUMAN U5 small nuclear ribonucleoprotein 200 kDa helicase OS=Homo sapiens OX=9606 GN=SNRNP200 PE=1 SV=2	940.559	5.94308e-14	5.94308e-14	TIHKYVHLFPK	4	1173	>sp|O75643|U520_HUMAN U5 small nuclear ribonucleoprotein 200 kDa helicase OS=Homo sapiens OX=9606 GN=SNRNP200 PE=1 SV=2	1381.79	1.83516e-39	8.97922e-60	KLPEEVVK-1-TIHKYVHLFPK-4	SNRNP200	SNRNP200	>sp|O75643|U520_HUMAN U5 small nuclear ribonucleoprotein 200 kDa helicase OS=Homo sapiens OX=9606 GN=SNRNP200 PE=1 SV=2	>sp|O75643|U520_HUMAN U5 small nuclear ribonucleoprotein 200 kDa helicase OS=Homo sapiens OX=9606 GN=SNRNP200 PE=1 SV=2	1134	1176	0	2136	2136	sp|O75643|SNRNP200	sp|O75643|SNRNP200	SNRNP200_1134	SNRNP200_1176	SNRNP200-1134-SNRNP200-1176	>sp|O75643|U520_HUMAN U5 small nuclear ribonucleoprotein 200 kDa helicase OS=Homo sapiens OX=9606 GN=SNRNP200 PE=1 SV=2-1134->sp|O75643|U520_HUMAN U5 small nuclear ribonucleoprotein 200 kDa helicase OS=Homo sapiens OX=9606 GN=SNRNP200 PE=1 SV=2-1176	target	1
36-1-2-1-2-1	F1_20200821_HS_1090_FU_1_A12.mgf	26788	4	2163.14	1	KLPEEVVKK	8	1134	>sp|O75643|U520_HUMAN U5 small nuclear ribonucleoprotein 200 kDa helicase OS=Homo sapiens OX=9606 GN=SNRNP200 PE=1 SV=2	1068.65	2.25889e-13	2.25889e-13	KNFPFER	1	1146	>sp|O75643|U520_HUMAN U5 small nuclear ribonucleoprotein 200 kDa helicase OS=Homo sapiens OX=9606 GN=SNRNP200 PE=1 SV=2	936.482	2.38855e-14	2.38855e-14	KNFPFER-1-KLPEEVVKK-8	SNRNP200	SNRNP200	>sp|O75643|U520_HUMAN U5 small nuclear ribonucleoprotein 200 kDa helicase OS=Homo sapiens OX=9606 GN=SNRNP200 PE=1 SV=2	>sp|O75643|U520_HUMAN U5 small nuclear ribonucleoprotein 200 kDa helicase OS=Homo sapiens OX=9606 GN=SNRNP200 PE=1 SV=2	1141	1146	0	2136	2136	sp|O75643|SNRNP200	sp|O75643|SNRNP200	SNRNP200_1141	SNRNP200_1146	SNRNP200-1141-SNRNP200-1146	>sp|O75643|U520_HUMAN U5 small nuclear ribonucleoprotein 200 kDa helicase OS=Homo sapiens OX=9606 GN=SNRNP200 PE=1 SV=2-1141->sp|O75643|U520_HUMAN U5 small nuclear ribonucleoprotein 200 kDa helicase OS=Homo sapiens OX=9606 GN=SNRNP200 PE=1 SV=2-1146	target	1
198-1-1-1-3-1	F1_20200821_HS_1090_FU_1_A12.mgf	25591	5	2230.14	1	MPKMGK	3	1167	>sp|O75643|U520_HUMAN U5 small nuclear ribonucleoprotein 200 kDa helicase OS=Homo sapiens OX=9606 GN=SNRNP200 PE=1 SV=2	690.356	5.10317e-11	2.8899e-12	TIHKYVHLFPK	4	1173	>sp|O75643|U520_HUMAN U5 small nuclear ribonucleoprotein 200 kDa helicase OS=Homo sapiens OX=9606 GN=SNRNP200 PE=1 SV=2	1381.79	2.51441e-38	7.68555e-53	MPKMGK-3-TIHKYVHLFPK-4	SNRNP200	SNRNP200	>sp|O75643|U520_HUMAN U5 small nuclear ribonucleoprotein 200 kDa helicase OS=Homo sapiens OX=9606 GN=SNRNP200 PE=1 SV=2	>sp|O75643|U520_HUMAN U5 small nuclear ribonucleoprotein 200 kDa helicase OS=Homo sapiens OX=9606 GN=SNRNP200 PE=1 SV=2	1169	1176	0	2136	2136	sp|O75643|SNRNP200	sp|O75643|SNRNP200	SNRNP200_1169	SNRNP200_1176	SNRNP200-1169-SNRNP200-1176	>sp|O75643|U520_HUMAN U5 small nuclear ribonucleoprotein 200 kDa helicase OS=Homo sapiens OX=9606 GN=SNRNP200 PE=1 SV=2-1169->sp|O75643|U520_HUMAN U5 small nuclear ribonucleoprotein 200 kDa helicase OS=Homo sapiens OX=9606 GN=SNRNP200 PE=1 SV=2-1176	target	1
269-1-32-1-4-1	F1_20200821_HS_1090_FU_1_A8.mgf	29483	6	6513.29	1	HLILPEKYPPPTELLDLQPLPVSALR	7	1288	>sp|O75643|U520_HUMAN U5 small nuclear ribonucleoprotein 200 kDa helicase OS=Homo sapiens OX=9606 GN=SNRNP200 PE=1 SV=2	2948.67	1.14375e-30	1.14375e-30	KFLYEPLPVESHLDHCMHDHFNAEIVTK	1	1716	>sp|O75643|U520_HUMAN U5 small nuclear ribonucleoprotein 200 kDa helicase OS=Homo sapiens OX=9606 GN=SNRNP200 PE=1 SV=2	3405.63	1.21477e-23	1.16803e-31	HLILPEKYPPPTELLDLQPLPVSALR-7-KFLYEPLPVESHLDHCMHDHFNAEIVTK-1	SNRNP200	SNRNP200	>sp|O75643|U520_HUMAN U5 small nuclear ribonucleoprotein 200 kDa helicase OS=Homo sapiens OX=9606 GN=SNRNP200 PE=1 SV=2	>sp|O75643|U520_HUMAN U5 small nuclear ribonucleoprotein 200 kDa helicase OS=Homo sapiens OX=9606 GN=SNRNP200 PE=1 SV=2	1294	1716	0	2136	2136	sp|O75643|SNRNP200	sp|O75643|SNRNP200	SNRNP200_1294	SNRNP200_1716	SNRNP200-1294-SNRNP200-1716	>sp|O75643|U520_HUMAN U5 small nuclear ribonucleoprotein 200 kDa helicase OS=Homo sapiens OX=9606 GN=SNRNP200 PE=1 SV=2-1294->sp|O75643|U520_HUMAN U5 small nuclear ribonucleoprotein 200 kDa helicase OS=Homo sapiens OX=9606 GN=SNRNP200 PE=1 SV=2-1716	target	1
221-1-3-1-9-1	F1_20200821_HS_1090_FU_1_A11.mgf	51554	4	3928.91	1	DSWLDNIDWVKIR	11	117	>sp|O95400|CD2B2_HUMAN CD2 antigen cytoplasmic tail-binding protein 2 OS=Homo sapiens OX=9606 GN=CD2BP2 PE=1 SV=1	1658.84	2.38805e-40	2.38805e-40	SLQYEYKANSNLVLQADR	7	8	>sp|O75643|U520_HUMAN U5 small nuclear ribonucleoprotein 200 kDa helicase OS=Homo sapiens OX=9606 GN=SNRNP200 PE=1 SV=2	2111.06	4.03606e-35	1.17144e-36	DSWLDNIDWVKIR-11-SLQYEYKANSNLVLQADR-7	CD2BP2	SNRNP200	>sp|O95400|CD2B2_HUMAN CD2 antigen cytoplasmic tail-binding protein 2 OS=Homo sapiens OX=9606 GN=CD2BP2 PE=1 SV=1	>sp|O75643|U520_HUMAN U5 small nuclear ribonucleoprotein 200 kDa helicase OS=Homo sapiens OX=9606 GN=SNRNP200 PE=1 SV=2	127	14	0	341	2136	sp|O95400|CD2BP2	sp|O75643|SNRNP200	CD2BP2_127	SNRNP200_14	CD2BP2-127-SNRNP200-14	>sp|O75643|U520_HUMAN U5 small nuclear ribonucleoprotein 200 kDa helicase OS=Homo sapiens OX=9606 GN=SNRNP200 PE=1 SV=2-14->sp|O95400|CD2B2_HUMAN CD2 antigen cytoplasmic tail-binding protein 2 OS=Homo sapiens OX=9606 GN=CD2BP2 PE=1 SV=1-127	target	1
368-2-10-1-9-1	F1_20200821_HS_1090_FU_1_A11.mgf	37680	4	3842.86	1	WSKQTDVGITHFR	3	1342	>sp|Q6P2Q9|PRP8_HUMAN Pre-mRNA-processing-splicing factor 8 OS=Homo sapiens OX=9606 GN=PRPF8 PE=1 SV=2	1573.8	1.68181e-28	6.7241e-43	SLQYEYKANSNLVLQADR	7	8	>sp|O75643|U520_HUMAN U5 small nuclear ribonucleoprotein 200 kDa helicase OS=Homo sapiens OX=9606 GN=SNRNP200 PE=1 SV=2	2111.06	1.99742e-51	2.81942e-53	WSKQTDVGITHFR-3-SLQYEYKANSNLVLQADR-7	PRPF8	SNRNP200	>sp|Q6P2Q9|PRP8_HUMAN Pre-mRNA-processing-splicing factor 8 OS=Homo sapiens OX=9606 GN=PRPF8 PE=1 SV=2	>sp|O75643|U520_HUMAN U5 small nuclear ribonucleoprotein 200 kDa helicase OS=Homo sapiens OX=9606 GN=SNRNP200 PE=1 SV=2	1344	14	0	2335	2136	sp|Q6P2Q9|PRPF8	sp|O75643|SNRNP200	PRPF8_1344	SNRNP200_14	PRPF8-1344-SNRNP200-14	>sp|O75643|U520_HUMAN U5 small nuclear ribonucleoprotein 200 kDa helicase OS=Homo sapiens OX=9606 GN=SNRNP200 PE=1 SV=2-14->sp|Q6P2Q9|PRP8_HUMAN Pre-mRNA-processing-splicing factor 8 OS=Homo sapiens OX=9606 GN=PRPF8 PE=1 SV=2-1344	target	1
222-1-2-1-9-1	F1_20200821_HS_1090_FU_1_A11.mgf	38770	4	3247.66	1	VSYQKLLK	5	445	>sp|Q6P2Q9|PRP8_HUMAN Pre-mRNA-processing-splicing factor 8 OS=Homo sapiens OX=9606 GN=PRPF8 PE=1 SV=2	977.591	5.50046e-10	1.80387e-17	SLQYEYKANSNLVLQADR	7	8	>sp|O75643|U520_HUMAN U5 small nuclear ribonucleoprotein 200 kDa helicase OS=Homo sapiens OX=9606 GN=SNRNP200 PE=1 SV=2	2111.06	8.47772e-36	8.47772e-36	VSYQKLLK-5-SLQYEYKANSNLVLQADR-7	PRPF8	SNRNP200	>sp|Q6P2Q9|PRP8_HUMAN Pre-mRNA-processing-splicing factor 8 OS=Homo sapiens OX=9606 GN=PRPF8 PE=1 SV=2	>sp|O75643|U520_HUMAN U5 small nuclear ribonucleoprotein 200 kDa helicase OS=Homo sapiens OX=9606 GN=SNRNP200 PE=1 SV=2	449	14	0	2335	2136	sp|Q6P2Q9|PRPF8	sp|O75643|SNRNP200	PRPF8_449	SNRNP200_14	PRPF8-449-SNRNP200-14	>sp|O75643|U520_HUMAN U5 small nuclear ribonucleoprotein 200 kDa helicase OS=Homo sapiens OX=9606 GN=SNRNP200 PE=1 SV=2-14->sp|Q6P2Q9|PRP8_HUMAN Pre-mRNA-processing-splicing factor 8 OS=Homo sapiens OX=9606 GN=PRPF8 PE=1 SV=2-449	target	1
315-1-10-1-9-1	F1_20200821_HS_1090_FU_1_A11.mgf	32746	4	3263.62	1	ELHAIKER	6	246	>sp|Q9BUQ8|DDX23_HUMAN Probable ATP-dependent RNA helicase DDX23 OS=Homo sapiens OX=9606 GN=DDX23 PE=1 SV=3	994.556	3.25024e-21	1.6473e-31	SLQYEYKANSNLVLQADR	7	8	>sp|O75643|U520_HUMAN U5 small nuclear ribonucleoprotein 200 kDa helicase OS=Homo sapiens OX=9606 GN=SNRNP200 PE=1 SV=2	2111.06	5.73371e-52	5.73371e-52	ELHAIKER-6-SLQYEYKANSNLVLQADR-7	DDX23	SNRNP200	>sp|Q9BUQ8|DDX23_HUMAN Probable ATP-dependent RNA helicase DDX23 OS=Homo sapiens OX=9606 GN=DDX23 PE=1 SV=3	>sp|O75643|U520_HUMAN U5 small nuclear ribonucleoprotein 200 kDa helicase OS=Homo sapiens OX=9606 GN=SNRNP200 PE=1 SV=2	251	14	0	820	2136	sp|Q9BUQ8|DDX23	sp|O75643|SNRNP200	DDX23_251	SNRNP200_14	DDX23-251-SNRNP200-14	>sp|O75643|U520_HUMAN U5 small nuclear ribonucleoprotein 200 kDa helicase OS=Homo sapiens OX=9606 GN=SNRNP200 PE=1 SV=2-14->sp|Q9BUQ8|DDX23_HUMAN Probable ATP-dependent RNA helicase DDX23 OS=Homo sapiens OX=9606 GN=DDX23 PE=1 SV=3-251	target	1
47-1-2-1-7-1	F1_20200821_HS_1090_FU_1_A9.mgf	42133	4	3914.14	1	KVVLLTGETSTDLK	1	1404	>sp|O75643|U520_HUMAN U5 small nuclear ribonucleoprotein 200 kDa helicase OS=Homo sapiens OX=9606 GN=SNRNP200 PE=1 SV=2	1502.86	2.85251e-46	1.1041e-65	LLGKGNIIISTPEKWDILSR	4	1418	>sp|O75643|U520_HUMAN U5 small nuclear ribonucleoprotein 200 kDa helicase OS=Homo sapiens OX=9606 GN=SNRNP200 PE=1 SV=2	2252.29	4.39075e-45	1.80986e-62	KVVLLTGETSTDLK-1-LLGKGNIIISTPEKWDILSR-4	SNRNP200	SNRNP200	>sp|O75643|U520_HUMAN U5 small nuclear ribonucleoprotein 200 kDa helicase OS=Homo sapiens OX=9606 GN=SNRNP200 PE=1 SV=2	>sp|O75643|U520_HUMAN U5 small nuclear ribonucleoprotein 200 kDa helicase OS=Homo sapiens OX=9606 GN=SNRNP200 PE=1 SV=2	1404	1421	0	2136	2136	sp|O75643|SNRNP200	sp|O75643|SNRNP200	SNRNP200_1404	SNRNP200_1421	SNRNP200-1404-SNRNP200-1421	>sp|O75643|U520_HUMAN U5 small nuclear ribonucleoprotein 200 kDa helicase OS=Homo sapiens OX=9606 GN=SNRNP200 PE=1 SV=2-1404->sp|O75643|U520_HUMAN U5 small nuclear ribonucleoprotein 200 kDa helicase OS=Homo sapiens OX=9606 GN=SNRNP200 PE=1 SV=2-1421	target	1
318-1-2-1-2-1	F1_20200821_HS_1090_FU_1_A9.mgf	41391	4	3569.89	1	KVVLLTGETSTDLK	1	1404	>sp|O75643|U520_HUMAN U5 small nuclear ribonucleoprotein 200 kDa helicase OS=Homo sapiens OX=9606 GN=SNRNP200 PE=1 SV=2	1502.86	4.17924e-24	3.76588e-31	EEEVTGPVIAPLFPQKR	16	2044	>sp|O75643|U520_HUMAN U5 small nuclear ribonucleoprotein 200 kDa helicase OS=Homo sapiens OX=9606 GN=SNRNP200 PE=1 SV=2	1909.03	2.12035e-48	5.02942e-52	KVVLLTGETSTDLK-1-EEEVTGPVIAPLFPQKR-16	SNRNP200	SNRNP200	>sp|O75643|U520_HUMAN U5 small nuclear ribonucleoprotein 200 kDa helicase OS=Homo sapiens OX=9606 GN=SNRNP200 PE=1 SV=2	>sp|O75643|U520_HUMAN U5 small nuclear ribonucleoprotein 200 kDa helicase OS=Homo sapiens OX=9606 GN=SNRNP200 PE=1 SV=2	1404	2059	0	2136	2136	sp|O75643|SNRNP200	sp|O75643|SNRNP200	SNRNP200_1404	SNRNP200_2059	SNRNP200-1404-SNRNP200-2059	>sp|O75643|U520_HUMAN U5 small nuclear ribonucleoprotein 200 kDa helicase OS=Homo sapiens OX=9606 GN=SNRNP200 PE=1 SV=2-1404->sp|O75643|U520_HUMAN U5 small nuclear ribonucleoprotein 200 kDa helicase OS=Homo sapiens OX=9606 GN=SNRNP200 PE=1 SV=2-2059	target	1
474-1-3-1-90-1	F1_20200821_HS_1090_FU_1_A9.mgf	46846	5	5101.69	1	LLGKGNIIISTPEK	4	1418	>sp|O75643|U520_HUMAN U5 small nuclear ribonucleoprotein 200 kDa helicase OS=Homo sapiens OX=9606 GN=SNRNP200 PE=1 SV=2	1481.88	1.40808e-31	5.45014e-51	KNVQNINLFVVDEVHLIGGENGPVLEVICSR	1	1443	>sp|O75643|U520_HUMAN U5 small nuclear ribonucleoprotein 200 kDa helicase OS=Homo sapiens OX=9606 GN=SNRNP200 PE=1 SV=2	3460.81	1.4134e-54	1.97855e-57	LLGKGNIIISTPEK-4-KNVQNINLFVVDEVHLIGGENGPVLEVICSR-1	SNRNP200	SNRNP200	>sp|O75643|U520_HUMAN U5 small nuclear ribonucleoprotein 200 kDa helicase OS=Homo sapiens OX=9606 GN=SNRNP200 PE=1 SV=2	>sp|O75643|U520_HUMAN U5 small nuclear ribonucleoprotein 200 kDa helicase OS=Homo sapiens OX=9606 GN=SNRNP200 PE=1 SV=2	1421	1443	0	2136	2136	sp|O75643|SNRNP200	sp|O75643|SNRNP200	SNRNP200_1421	SNRNP200_1443	SNRNP200-1421-SNRNP200-1443	>sp|O75643|U520_HUMAN U5 small nuclear ribonucleoprotein 200 kDa helicase OS=Homo sapiens OX=9606 GN=SNRNP200 PE=1 SV=2-1421->sp|O75643|U520_HUMAN U5 small nuclear ribonucleoprotein 200 kDa helicase OS=Homo sapiens OX=9606 GN=SNRNP200 PE=1 SV=2-1443	target	1
288-1-2-1-7-1	F1_20200821_HS_1090_FU_1_A10.mgf	50304	5	4320.32	1	LLGKGNIIISTPEKWDILSR	4	1418	>sp|O75643|U520_HUMAN U5 small nuclear ribonucleoprotein 200 kDa helicase OS=Homo sapiens OX=9606 GN=SNRNP200 PE=1 SV=2	2252.29	4.82535e-38	1.46022e-54	EEEVTGPVIAPLFPQKR	16	2044	>sp|O75643|U520_HUMAN U5 small nuclear ribonucleoprotein 200 kDa helicase OS=Homo sapiens OX=9606 GN=SNRNP200 PE=1 SV=2	1909.03	1.29947e-25	3.76313e-27	EEEVTGPVIAPLFPQKR-16-LLGKGNIIISTPEKWDILSR-4	SNRNP200	SNRNP200	>sp|O75643|U520_HUMAN U5 small nuclear ribonucleoprotein 200 kDa helicase OS=Homo sapiens OX=9606 GN=SNRNP200 PE=1 SV=2	>sp|O75643|U520_HUMAN U5 small nuclear ribonucleoprotein 200 kDa helicase OS=Homo sapiens OX=9606 GN=SNRNP200 PE=1 SV=2	1421	2059	0	2136	2136	sp|O75643|SNRNP200	sp|O75643|SNRNP200	SNRNP200_1421	SNRNP200_2059	SNRNP200-1421-SNRNP200-2059	>sp|O75643|U520_HUMAN U5 small nuclear ribonucleoprotein 200 kDa helicase OS=Homo sapiens OX=9606 GN=SNRNP200 PE=1 SV=2-1421->sp|O75643|U520_HUMAN U5 small nuclear ribonucleoprotein 200 kDa helicase OS=Homo sapiens OX=9606 GN=SNRNP200 PE=1 SV=2-2059	target	1
390-1-2-1-5-1	F1_20200821_HS_1090_FU_1_A10.mgf	53801	4	4261.16	1	GNIIISTPEKWDILSR	10	1422	>sp|O75643|U520_HUMAN U5 small nuclear ribonucleoprotein 200 kDa helicase OS=Homo sapiens OX=9606 GN=SNRNP200 PE=1 SV=2	1841	4.76579e-27	3.87554e-33	MQLSAELQSDTEEILSKAIR	17	1902	>sp|O75643|U520_HUMAN U5 small nuclear ribonucleoprotein 200 kDa helicase OS=Homo sapiens OX=9606 GN=SNRNP200 PE=1 SV=2	2261.16	1.61716e-52	5.33243e-70	GNIIISTPEKWDILSR-10-MQLSAELQSDTEEILSKAIR-17	SNRNP200	SNRNP200	>sp|O75643|U520_HUMAN U5 small nuclear ribonucleoprotein 200 kDa helicase OS=Homo sapiens OX=9606 GN=SNRNP200 PE=1 SV=2	>sp|O75643|U520_HUMAN U5 small nuclear ribonucleoprotein 200 kDa helicase OS=Homo sapiens OX=9606 GN=SNRNP200 PE=1 SV=2	1431	1918	0	2136	2136	sp|O75643|SNRNP200	sp|O75643|SNRNP200	SNRNP200_1431	SNRNP200_1918	SNRNP200-1431-SNRNP200-1918	>sp|O75643|U520_HUMAN U5 small nuclear ribonucleoprotein 200 kDa helicase OS=Homo sapiens OX=9606 GN=SNRNP200 PE=1 SV=2-1431->sp|O75643|U520_HUMAN U5 small nuclear ribonucleoprotein 200 kDa helicase OS=Homo sapiens OX=9606 GN=SNRNP200 PE=1 SV=2-1918	target	1
13-1-16-1-3-1	F1_20200821_HS_1090_FU_1_A10.mgf	54208	4	3250.65	1	DLILADYGKK	9	1985	>sp|Q6P2Q9|PRP8_HUMAN Pre-mRNA-processing-splicing factor 8 OS=Homo sapiens OX=9606 GN=PRPF8 PE=1 SV=2	1134.63	3.04895e-19	3.04895e-19	DILCGAADEVLAVLKNEK	15	130	>sp|O75643|U520_HUMAN U5 small nuclear ribonucleoprotein 200 kDa helicase OS=Homo sapiens OX=9606 GN=SNRNP200 PE=1 SV=2	1957.02	1.24575e-59	1.24575e-59	DLILADYGKK-9-DILCGAADEVLAVLKNEK-15	PRPF8	SNRNP200	>sp|Q6P2Q9|PRP8_HUMAN Pre-mRNA-processing-splicing factor 8 OS=Homo sapiens OX=9606 GN=PRPF8 PE=1 SV=2	>sp|O75643|U520_HUMAN U5 small nuclear ribonucleoprotein 200 kDa helicase OS=Homo sapiens OX=9606 GN=SNRNP200 PE=1 SV=2	1993	144	0	2335	2136	sp|Q6P2Q9|PRPF8	sp|O75643|SNRNP200	PRPF8_1993	SNRNP200_144	PRPF8-1993-SNRNP200-144	>sp|O75643|U520_HUMAN U5 small nuclear ribonucleoprotein 200 kDa helicase OS=Homo sapiens OX=9606 GN=SNRNP200 PE=1 SV=2-144->sp|Q6P2Q9|PRP8_HUMAN Pre-mRNA-processing-splicing factor 8 OS=Homo sapiens OX=9606 GN=PRPF8 PE=1 SV=2-1993	target	1
10-1-1-1-4-1	F1_20200821_HS_1090_FU_1_A10.mgf	51005	4	3639.78	1	RKEIDLLLGQTDDTR	2	154	>sp|O75643|U520_HUMAN U5 small nuclear ribonucleoprotein 200 kDa helicase OS=Homo sapiens OX=9606 GN=SNRNP200 PE=1 SV=2	1771.94	3.84617e-32	1.10642e-45	DMCLEKDTLGLFLR	6	740	>sp|O75643|U520_HUMAN U5 small nuclear ribonucleoprotein 200 kDa helicase OS=Homo sapiens OX=9606 GN=SNRNP200 PE=1 SV=2	1709.85	3.51305e-42	3.51305e-42	DMCLEKDTLGLFLR-6-RKEIDLLLGQTDDTR-2	SNRNP200	SNRNP200	>sp|O75643|U520_HUMAN U5 small nuclear ribonucleoprotein 200 kDa helicase OS=Homo sapiens OX=9606 GN=SNRNP200 PE=1 SV=2	>sp|O75643|U520_HUMAN U5 small nuclear ribonucleoprotein 200 kDa helicase OS=Homo sapiens OX=9606 GN=SNRNP200 PE=1 SV=2	155	745	0	2136	2136	sp|O75643|SNRNP200	sp|O75643|SNRNP200	SNRNP200_155	SNRNP200_745	SNRNP200-155-SNRNP200-745	>sp|O75643|U520_HUMAN U5 small nuclear ribonucleoprotein 200 kDa helicase OS=Homo sapiens OX=9606 GN=SNRNP200 PE=1 SV=2-155->sp|O75643|U520_HUMAN U5 small nuclear ribonucleoprotein 200 kDa helicase OS=Homo sapiens OX=9606 GN=SNRNP200 PE=1 SV=2-745	target	1
46-1-3-1-1-1	F1_20200821_HS_1090_FU_1_A11.mgf	19512	4	2527.29	1	PVYHAITKHSPK	8	1545	>sp|O75643|U520_HUMAN U5 small nuclear ribonucleoprotein 200 kDa helicase OS=Homo sapiens OX=9606 GN=SNRNP200 PE=1 SV=2	1376.76	1.87213e-37	5.56111e-60	NNLVKYDK	5	967	>sp|O75643|U520_HUMAN U5 small nuclear ribonucleoprotein 200 kDa helicase OS=Homo sapiens OX=9606 GN=SNRNP200 PE=1 SV=2	992.529	1.15354e-23	1.15354e-23	NNLVKYDK-5-PVYHAITKHSPK-8	SNRNP200	SNRNP200	>sp|O75643|U520_HUMAN U5 small nuclear ribonucleoprotein 200 kDa helicase OS=Homo sapiens OX=9606 GN=SNRNP200 PE=1 SV=2	>sp|O75643|U520_HUMAN U5 small nuclear ribonucleoprotein 200 kDa helicase OS=Homo sapiens OX=9606 GN=SNRNP200 PE=1 SV=2	1552	971	0	2136	2136	sp|O75643|SNRNP200	sp|O75643|SNRNP200	SNRNP200_1552	SNRNP200_971	SNRNP200-1552-SNRNP200-971	>sp|O75643|U520_HUMAN U5 small nuclear ribonucleoprotein 200 kDa helicase OS=Homo sapiens OX=9606 GN=SNRNP200 PE=1 SV=2-1552->sp|O75643|U520_HUMAN U5 small nuclear ribonucleoprotein 200 kDa helicase OS=Homo sapiens OX=9606 GN=SNRNP200 PE=1 SV=2-971	target	1
401-1-1-1-1-1	F1_20200821_HS_1090_FU_1_A10.mgf	21150	5	3289.66	1	PVYHAITKHSPK	8	1545	>sp|O75643|U520_HUMAN U5 small nuclear ribonucleoprotein 200 kDa helicase OS=Homo sapiens OX=9606 GN=SNRNP200 PE=1 SV=2	1376.76	3.16271e-27	3.54937e-45	YDKKTGNFQVTELGR	3	972	>sp|O75643|U520_HUMAN U5 small nuclear ribonucleoprotein 200 kDa helicase OS=Homo sapiens OX=9606 GN=SNRNP200 PE=1 SV=2	1754.9	1.16448e-32	1.16448e-32	PVYHAITKHSPK-8-YDKKTGNFQVTELGR-3	SNRNP200	SNRNP200	>sp|O75643|U520_HUMAN U5 small nuclear ribonucleoprotein 200 kDa helicase OS=Homo sapiens OX=9606 GN=SNRNP200 PE=1 SV=2	>sp|O75643|U520_HUMAN U5 small nuclear ribonucleoprotein 200 kDa helicase OS=Homo sapiens OX=9606 GN=SNRNP200 PE=1 SV=2	1552	974	0	2136	2136	sp|O75643|SNRNP200	sp|O75643|SNRNP200	SNRNP200_1552	SNRNP200_974	SNRNP200-1552-SNRNP200-974	>sp|O75643|U520_HUMAN U5 small nuclear ribonucleoprotein 200 kDa helicase OS=Homo sapiens OX=9606 GN=SNRNP200 PE=1 SV=2-1552->sp|O75643|U520_HUMAN U5 small nuclear ribonucleoprotein 200 kDa helicase OS=Homo sapiens OX=9606 GN=SNRNP200 PE=1 SV=2-974	target	1
370-1-5-1-6-1	F1_20200821_HS_1090_FU_1_A9.mgf	22058	5	3542.83	1	LLSMoAKPVYHAITKHSPK	14	1539	>sp|O75643|U520_HUMAN U5 small nuclear ribonucleoprotein 200 kDa helicase OS=Homo sapiens OX=9606 GN=SNRNP200 PE=1 SV=2	2036.12	2.26197e-08	1.09604e-16	KTGNFQVTELGR	1	975	>sp|O75643|U520_HUMAN U5 small nuclear ribonucleoprotein 200 kDa helicase OS=Homo sapiens OX=9606 GN=SNRNP200 PE=1 SV=2	1348.71	1.54999e-32	1.54999e-32	KTGNFQVTELGR-1-LLSMoAKPVYHAITKHSPK-14	SNRNP200	SNRNP200	>sp|O75643|U520_HUMAN U5 small nuclear ribonucleoprotein 200 kDa helicase OS=Homo sapiens OX=9606 GN=SNRNP200 PE=1 SV=2	>sp|O75643|U520_HUMAN U5 small nuclear ribonucleoprotein 200 kDa helicase OS=Homo sapiens OX=9606 GN=SNRNP200 PE=1 SV=2	1552	975	0	2136	2136	sp|O75643|SNRNP200	sp|O75643|SNRNP200	SNRNP200_1552	SNRNP200_975	SNRNP200-1552-SNRNP200-975	>sp|O75643|U520_HUMAN U5 small nuclear ribonucleoprotein 200 kDa helicase OS=Homo sapiens OX=9606 GN=SNRNP200 PE=1 SV=2-1552->sp|O75643|U520_HUMAN U5 small nuclear ribonucleoprotein 200 kDa helicase OS=Homo sapiens OX=9606 GN=SNRNP200 PE=1 SV=2-975	target	1
35-1-1-1-1-1	F1_20200821_HS_1090_FU_1_A10.mgf	33571	6	4096.12	1	HSPKKPVIVFVPSR	4	1553	>sp|O75643|U520_HUMAN U5 small nuclear ribonucleoprotein 200 kDa helicase OS=Homo sapiens OX=9606 GN=SNRNP200 PE=1 SV=2	1589.94	2.84238e-19	1.89603e-32	FLYQLHETEKEDLIREER	10	359	>sp|O75643|U520_HUMAN U5 small nuclear ribonucleoprotein 200 kDa helicase OS=Homo sapiens OX=9606 GN=SNRNP200 PE=1 SV=2	2347.18	3.66826e-22	2.88184e-33	HSPKKPVIVFVPSR-4-FLYQLHETEKEDLIREER-10	SNRNP200	SNRNP200	>sp|O75643|U520_HUMAN U5 small nuclear ribonucleoprotein 200 kDa helicase OS=Homo sapiens OX=9606 GN=SNRNP200 PE=1 SV=2	>sp|O75643|U520_HUMAN U5 small nuclear ribonucleoprotein 200 kDa helicase OS=Homo sapiens OX=9606 GN=SNRNP200 PE=1 SV=2	1556	368	0	2136	2136	sp|O75643|SNRNP200	sp|O75643|SNRNP200	SNRNP200_1556	SNRNP200_368	SNRNP200-1556-SNRNP200-368	>sp|O75643|U520_HUMAN U5 small nuclear ribonucleoprotein 200 kDa helicase OS=Homo sapiens OX=9606 GN=SNRNP200 PE=1 SV=2-1556->sp|O75643|U520_HUMAN U5 small nuclear ribonucleoprotein 200 kDa helicase OS=Homo sapiens OX=9606 GN=SNRNP200 PE=1 SV=2-368	target	1
365-1-1-1-94-1	F1_20200821_HS_1090_FU_1_A9.mgf	43137	5	4923.4	1	FLHCTEKDLIPYLEK	7	1589	>sp|O75643|U520_HUMAN U5 small nuclear ribonucleoprotein 200 kDa helicase OS=Homo sapiens OX=9606 GN=SNRNP200 PE=1 SV=2	1904.97	5.41197e-32	1.57583e-42	LSDSTLKETLLNGVGYLHEGLSPMER	7	1604	>sp|O75643|U520_HUMAN U5 small nuclear ribonucleoprotein 200 kDa helicase OS=Homo sapiens OX=9606 GN=SNRNP200 PE=1 SV=2	2858.45	4.59833e-39	4.59833e-39	FLHCTEKDLIPYLEK-7-LSDSTLKETLLNGVGYLHEGLSPMER-7	SNRNP200	SNRNP200	>sp|O75643|U520_HUMAN U5 small nuclear ribonucleoprotein 200 kDa helicase OS=Homo sapiens OX=9606 GN=SNRNP200 PE=1 SV=2	>sp|O75643|U520_HUMAN U5 small nuclear ribonucleoprotein 200 kDa helicase OS=Homo sapiens OX=9606 GN=SNRNP200 PE=1 SV=2	1595	1610	0	2136	2136	sp|O75643|SNRNP200	sp|O75643|SNRNP200	SNRNP200_1595	SNRNP200_1610	SNRNP200-1595-SNRNP200-1610	>sp|O75643|U520_HUMAN U5 small nuclear ribonucleoprotein 200 kDa helicase OS=Homo sapiens OX=9606 GN=SNRNP200 PE=1 SV=2-1595->sp|O75643|U520_HUMAN U5 small nuclear ribonucleoprotein 200 kDa helicase OS=Homo sapiens OX=9606 GN=SNRNP200 PE=1 SV=2-1610	target	1
355-1-3-1-11-1	F1_20200821_HS_1090_FU_1_A10.mgf	29957	4	4116.01	1	TVNKHGDEIITSTTSNYETQTFSSK	4	2046	>sp|Q6P2Q9|PRP8_HUMAN Pre-mRNA-processing-splicing factor 8 OS=Homo sapiens OX=9606 GN=PRPF8 PE=1 SV=2	2787.32	2.7801e-32	2.20271e-46	YHVLVNLGKK	9	169	>sp|O75643|U520_HUMAN U5 small nuclear ribonucleoprotein 200 kDa helicase OS=Homo sapiens OX=9606 GN=SNRNP200 PE=1 SV=2	1169.69	1.97908e-17	8.20206e-26	YHVLVNLGKK-9-TVNKHGDEIITSTTSNYETQTFSSK-4	PRPF8	SNRNP200	>sp|Q6P2Q9|PRP8_HUMAN Pre-mRNA-processing-splicing factor 8 OS=Homo sapiens OX=9606 GN=PRPF8 PE=1 SV=2	>sp|O75643|U520_HUMAN U5 small nuclear ribonucleoprotein 200 kDa helicase OS=Homo sapiens OX=9606 GN=SNRNP200 PE=1 SV=2	2049	177	0	2335	2136	sp|Q6P2Q9|PRPF8	sp|O75643|SNRNP200	PRPF8_2049	SNRNP200_177	PRPF8-2049-SNRNP200-177	>sp|O75643|U520_HUMAN U5 small nuclear ribonucleoprotein 200 kDa helicase OS=Homo sapiens OX=9606 GN=SNRNP200 PE=1 SV=2-177->sp|Q6P2Q9|PRP8_HUMAN Pre-mRNA-processing-splicing factor 8 OS=Homo sapiens OX=9606 GN=PRPF8 PE=1 SV=2-2049	target	1
366-1-16-1-3-1	F1_20200821_HS_1090_FU_1_A11.mgf	31328	4	2200.2	1	KSILEQR	1	523	>sp|Q92620|PRP16_HUMAN Pre-mRNA-splicing factor ATP-dependent RNA helicase PRP16 OS=Homo sapiens OX=9606 GN=DHX38 PE=1 SV=2	872.508	3.67985e-13	3.67985e-13	YHVLVNLGKK	9	169	>sp|O75643|U520_HUMAN U5 small nuclear ribonucleoprotein 200 kDa helicase OS=Homo sapiens OX=9606 GN=SNRNP200 PE=1 SV=2	1169.69	3.92545e-23	3.92545e-23	KSILEQR-1-YHVLVNLGKK-9	DHX38	SNRNP200	>sp|Q92620|PRP16_HUMAN Pre-mRNA-splicing factor ATP-dependent RNA helicase PRP16 OS=Homo sapiens OX=9606 GN=DHX38 PE=1 SV=2	>sp|O75643|U520_HUMAN U5 small nuclear ribonucleoprotein 200 kDa helicase OS=Homo sapiens OX=9606 GN=SNRNP200 PE=1 SV=2	523	177	0	1227	2136	sp|Q92620|DHX38	sp|O75643|SNRNP200	DHX38_523	SNRNP200_177	DHX38-523-SNRNP200-177	>sp|O75643|U520_HUMAN U5 small nuclear ribonucleoprotein 200 kDa helicase OS=Homo sapiens OX=9606 GN=SNRNP200 PE=1 SV=2-177->sp|Q92620|PRP16_HUMAN Pre-mRNA-splicing factor ATP-dependent RNA helicase PRP16 OS=Homo sapiens OX=9606 GN=DHX38 PE=1 SV=2-523	target	1
411-1-2-1-3-1	F1_20200821_HS_1090_FU_1_A10.mgf	28634	5	3147.61	1	QLAQKVPHK	5	1870	>sp|O75643|U520_HUMAN U5 small nuclear ribonucleoprotein 200 kDa helicase OS=Homo sapiens OX=9606 GN=SNRNP200 PE=1 SV=2	1047.62	4.96075e-21	1.21362e-28	DSYLKQLPHFTSEHIK	5	1957	>sp|O75643|U520_HUMAN U5 small nuclear ribonucleoprotein 200 kDa helicase OS=Homo sapiens OX=9606 GN=SNRNP200 PE=1 SV=2	1941.99	2.96911e-33	2.96911e-33	QLAQKVPHK-5-DSYLKQLPHFTSEHIK-5	SNRNP200	SNRNP200	>sp|O75643|U520_HUMAN U5 small nuclear ribonucleoprotein 200 kDa helicase OS=Homo sapiens OX=9606 GN=SNRNP200 PE=1 SV=2	>sp|O75643|U520_HUMAN U5 small nuclear ribonucleoprotein 200 kDa helicase OS=Homo sapiens OX=9606 GN=SNRNP200 PE=1 SV=2	1874	1961	0	2136	2136	sp|O75643|SNRNP200	sp|O75643|SNRNP200	SNRNP200_1874	SNRNP200_1961	SNRNP200-1874-SNRNP200-1961	>sp|O75643|U520_HUMAN U5 small nuclear ribonucleoprotein 200 kDa helicase OS=Homo sapiens OX=9606 GN=SNRNP200 PE=1 SV=2-1874->sp|O75643|U520_HUMAN U5 small nuclear ribonucleoprotein 200 kDa helicase OS=Homo sapiens OX=9606 GN=SNRNP200 PE=1 SV=2-1961	target	1
4-1-10-1-2-1	F1_20200821_HS_1090_FU_1_A11.mgf	25604	4	2591.33	1	LNNPKFNDPHVK	5	1879	>sp|O75643|U520_HUMAN U5 small nuclear ribonucleoprotein 200 kDa helicase OS=Homo sapiens OX=9606 GN=SNRNP200 PE=1 SV=2	1421.74	1.74161e-21	7.68414e-36	VLGKVGEPGR	4	231	>sp|Q9Y5U2|TSSC4_HUMAN Protein TSSC4 OS=Homo sapiens OX=9606 GN=TSSC4 PE=1 SV=3	1010.59	3.06187e-20	2.02425e-30	VLGKVGEPGR-4-LNNPKFNDPHVK-5	SNRNP200	TSSC4	>sp|O75643|U520_HUMAN U5 small nuclear ribonucleoprotein 200 kDa helicase OS=Homo sapiens OX=9606 GN=SNRNP200 PE=1 SV=2	>sp|Q9Y5U2|TSSC4_HUMAN Protein TSSC4 OS=Homo sapiens OX=9606 GN=TSSC4 PE=1 SV=3	1883	234	0	2136	329	sp|O75643|SNRNP200	sp|Q9Y5U2|TSSC4	SNRNP200_1883	TSSC4_234	SNRNP200-1883-TSSC4-234	>sp|O75643|U520_HUMAN U5 small nuclear ribonucleoprotein 200 kDa helicase OS=Homo sapiens OX=9606 GN=SNRNP200 PE=1 SV=2-1883->sp|Q9Y5U2|TSSC4_HUMAN Protein TSSC4 OS=Homo sapiens OX=9606 GN=TSSC4 PE=1 SV=3-234	target	1
389-1-1-1-4-1	F1_20200821_HS_1090_FU_1_A8.mgf	24432	5	3984.07	1	GYEEVHVPALKPKPFGSEEQLLPVEK	13	441	>sp|O75643|U520_HUMAN U5 small nuclear ribonucleoprotein 200 kDa helicase OS=Homo sapiens OX=9606 GN=SNRNP200 PE=1 SV=2	2919.54	1.11197e-53	5.61551e-72	IQSKLYR	4	484	>sp|O75643|U520_HUMAN U5 small nuclear ribonucleoprotein 200 kDa helicase OS=Homo sapiens OX=9606 GN=SNRNP200 PE=1 SV=2	906.529	3.75525e-15	1.44973e-25	IQSKLYR-4-GYEEVHVPALKPKPFGSEEQLLPVEK-13	SNRNP200	SNRNP200	>sp|O75643|U520_HUMAN U5 small nuclear ribonucleoprotein 200 kDa helicase OS=Homo sapiens OX=9606 GN=SNRNP200 PE=1 SV=2	>sp|O75643|U520_HUMAN U5 small nuclear ribonucleoprotein 200 kDa helicase OS=Homo sapiens OX=9606 GN=SNRNP200 PE=1 SV=2	453	487	0	2136	2136	sp|O75643|SNRNP200	sp|O75643|SNRNP200	SNRNP200_453	SNRNP200_487	SNRNP200-453-SNRNP200-487	>sp|O75643|U520_HUMAN U5 small nuclear ribonucleoprotein 200 kDa helicase OS=Homo sapiens OX=9606 GN=SNRNP200 PE=1 SV=2-453->sp|O75643|U520_HUMAN U5 small nuclear ribonucleoprotein 200 kDa helicase OS=Homo sapiens OX=9606 GN=SNRNP200 PE=1 SV=2-487	target	1
67-1-2-1-5-1	F1_20200821_HS_1090_FU_1_A11.mgf	49440	4	2861.38	1	DEPTGEVLSLVGKLEGTR	13	34	>sp|O75643|U520_HUMAN U5 small nuclear ribonucleoprotein 200 kDa helicase OS=Homo sapiens OX=9606 GN=SNRNP200 PE=1 SV=2	1898.99	4.30143e-47	4.30143e-47	MGDKAQR	4	52	>sp|O75643|U520_HUMAN U5 small nuclear ribonucleoprotein 200 kDa helicase OS=Homo sapiens OX=9606 GN=SNRNP200 PE=1 SV=2	804.391	2.56487e-13	3.05147e-26	MGDKAQR-4-DEPTGEVLSLVGKLEGTR-13	SNRNP200	SNRNP200	>sp|O75643|U520_HUMAN U5 small nuclear ribonucleoprotein 200 kDa helicase OS=Homo sapiens OX=9606 GN=SNRNP200 PE=1 SV=2	>sp|O75643|U520_HUMAN U5 small nuclear ribonucleoprotein 200 kDa helicase OS=Homo sapiens OX=9606 GN=SNRNP200 PE=1 SV=2	46	55	0	2136	2136	sp|O75643|SNRNP200	sp|O75643|SNRNP200	SNRNP200_46	SNRNP200_55	SNRNP200-46-SNRNP200-55	>sp|O75643|U520_HUMAN U5 small nuclear ribonucleoprotein 200 kDa helicase OS=Homo sapiens OX=9606 GN=SNRNP200 PE=1 SV=2-46->sp|O75643|U520_HUMAN U5 small nuclear ribonucleoprotein 200 kDa helicase OS=Homo sapiens OX=9606 GN=SNRNP200 PE=1 SV=2-55	target	1
179-1-1-1-4-1	F1_20200821_HS_1090_FU_1_A9.mgf	39052	6	5017.54	1	GYEEVHVPALKPKPFGSEEQLLPVEKLPK	26	441	>sp|O75643|U520_HUMAN U5 small nuclear ribonucleoprotein 200 kDa helicase OS=Homo sapiens OX=9606 GN=SNRNP200 PE=1 SV=2	3257.77	1.0345e-29	1.0345e-29	YAQAGFEGFKTLNR	10	470	>sp|O75643|U520_HUMAN U5 small nuclear ribonucleoprotein 200 kDa helicase OS=Homo sapiens OX=9606 GN=SNRNP200 PE=1 SV=2	1600.8	2.23221e-35	8.94776e-37	YAQAGFEGFKTLNR-10-GYEEVHVPALKPKPFGSEEQLLPVEKLPK-26	SNRNP200	SNRNP200	>sp|O75643|U520_HUMAN U5 small nuclear ribonucleoprotein 200 kDa helicase OS=Homo sapiens OX=9606 GN=SNRNP200 PE=1 SV=2	>sp|O75643|U520_HUMAN U5 small nuclear ribonucleoprotein 200 kDa helicase OS=Homo sapiens OX=9606 GN=SNRNP200 PE=1 SV=2	466	479	0	2136	2136	sp|O75643|SNRNP200	sp|O75643|SNRNP200	SNRNP200_466	SNRNP200_479	SNRNP200-466-SNRNP200-479	>sp|O75643|U520_HUMAN U5 small nuclear ribonucleoprotein 200 kDa helicase OS=Homo sapiens OX=9606 GN=SNRNP200 PE=1 SV=2-466->sp|O75643|U520_HUMAN U5 small nuclear ribonucleoprotein 200 kDa helicase OS=Homo sapiens OX=9606 GN=SNRNP200 PE=1 SV=2-479	target	1
19-1-48-1-1-1	F1_20200821_HS_1090_FU_1_A11.mgf	39680	4	3211.54	1	YAQAGFEGFKTLNR	10	470	>sp|O75643|U520_HUMAN U5 small nuclear ribonucleoprotein 200 kDa helicase OS=Homo sapiens OX=9606 GN=SNRNP200 PE=1 SV=2	1600.8	9.03918e-42	6.93287e-47	SLVQEMoVGSFGKR	12	546	>sp|O75643|U520_HUMAN U5 small nuclear ribonucleoprotein 200 kDa helicase OS=Homo sapiens OX=9606 GN=SNRNP200 PE=1 SV=2	1452.74	4.84029e-30	6.43585e-33	SLVQEMoVGSFGKR-12-YAQAGFEGFKTLNR-10	SNRNP200	SNRNP200	>sp|O75643|U520_HUMAN U5 small nuclear ribonucleoprotein 200 kDa helicase OS=Homo sapiens OX=9606 GN=SNRNP200 PE=1 SV=2	>sp|O75643|U520_HUMAN U5 small nuclear ribonucleoprotein 200 kDa helicase OS=Homo sapiens OX=9606 GN=SNRNP200 PE=1 SV=2	479	557	0	2136	2136	sp|O75643|SNRNP200	sp|O75643|SNRNP200	SNRNP200_479	SNRNP200_557	SNRNP200-479-SNRNP200-557	>sp|O75643|U520_HUMAN U5 small nuclear ribonucleoprotein 200 kDa helicase OS=Homo sapiens OX=9606 GN=SNRNP200 PE=1 SV=2-479->sp|O75643|U520_HUMAN U5 small nuclear ribonucleoprotein 200 kDa helicase OS=Homo sapiens OX=9606 GN=SNRNP200 PE=1 SV=2-557	target	1
370-1-1-1-120-1	F1_20200821_HS_1090_FU_1_A10.mgf	49004	5	4394.22	1	IQSKLYR	4	484	>sp|O75643|U520_HUMAN U5 small nuclear ribonucleoprotein 200 kDa helicase OS=Homo sapiens OX=9606 GN=SNRNP200 PE=1 SV=2	906.529	6.71295e-13	4.43804e-23	VDPAKGLFYFDNSFRPVPLEQTYVGITEK	5	667	>sp|O75643|U520_HUMAN U5 small nuclear ribonucleoprotein 200 kDa helicase OS=Homo sapiens OX=9606 GN=SNRNP200 PE=1 SV=2	3329.7	1.14475e-52	1.14475e-52	IQSKLYR-4-VDPAKGLFYFDNSFRPVPLEQTYVGITEK-5	SNRNP200	SNRNP200	>sp|O75643|U520_HUMAN U5 small nuclear ribonucleoprotein 200 kDa helicase OS=Homo sapiens OX=9606 GN=SNRNP200 PE=1 SV=2	>sp|O75643|U520_HUMAN U5 small nuclear ribonucleoprotein 200 kDa helicase OS=Homo sapiens OX=9606 GN=SNRNP200 PE=1 SV=2	487	671	0	2136	2136	sp|O75643|SNRNP200	sp|O75643|SNRNP200	SNRNP200_487	SNRNP200_671	SNRNP200-487-SNRNP200-671	>sp|O75643|U520_HUMAN U5 small nuclear ribonucleoprotein 200 kDa helicase OS=Homo sapiens OX=9606 GN=SNRNP200 PE=1 SV=2-487->sp|O75643|U520_HUMAN U5 small nuclear ribonucleoprotein 200 kDa helicase OS=Homo sapiens OX=9606 GN=SNRNP200 PE=1 SV=2-671	target	1
96-1-4-1-3-1	F1_20200821_HS_1090_FU_1_A9.mgf	47271	4	4728.28	1	AALETDENLLLCAPTGAGKTNVALMCMLR	19	491	>sp|O75643|U520_HUMAN U5 small nuclear ribonucleoprotein 200 kDa helicase OS=Homo sapiens OX=9606 GN=SNRNP200 PE=1 SV=2	3132.54	7.0899e-26	7.0899e-26	SLVQEMVGSFGKR	12	546	>sp|O75643|U520_HUMAN U5 small nuclear ribonucleoprotein 200 kDa helicase OS=Homo sapiens OX=9606 GN=SNRNP200 PE=1 SV=2	1436.74	5.19709e-17	5.19709e-17	SLVQEMVGSFGKR-12-AALETDENLLLCAPTGAGKTNVALMCMLR-19	SNRNP200	SNRNP200	>sp|O75643|U520_HUMAN U5 small nuclear ribonucleoprotein 200 kDa helicase OS=Homo sapiens OX=9606 GN=SNRNP200 PE=1 SV=2	>sp|O75643|U520_HUMAN U5 small nuclear ribonucleoprotein 200 kDa helicase OS=Homo sapiens OX=9606 GN=SNRNP200 PE=1 SV=2	509	557	0	2136	2136	sp|O75643|SNRNP200	sp|O75643|SNRNP200	SNRNP200_509	SNRNP200_557	SNRNP200-509-SNRNP200-557	>sp|O75643|U520_HUMAN U5 small nuclear ribonucleoprotein 200 kDa helicase OS=Homo sapiens OX=9606 GN=SNRNP200 PE=1 SV=2-509->sp|O75643|U520_HUMAN U5 small nuclear ribonucleoprotein 200 kDa helicase OS=Homo sapiens OX=9606 GN=SNRNP200 PE=1 SV=2-557	target	1
483-1-2-1-4-1	F1_20200821_HS_1090_FU_1_A12.mgf	5670	5	2387.1	1	MGDKAQR	4	52	>sp|O75643|U520_HUMAN U5 small nuclear ribonucleoprotein 200 kDa helicase OS=Homo sapiens OX=9606 GN=SNRNP200 PE=1 SV=2	804.391	2.53857e-16	6.62193e-28	KRDEDRHDINK	1	73	>sp|O75643|U520_HUMAN U5 small nuclear ribonucleoprotein 200 kDa helicase OS=Homo sapiens OX=9606 GN=SNRNP200 PE=1 SV=2	1424.71	4.67834e-06	3.69455e-20	MGDKAQR-4-KRDEDRHDINK-1	SNRNP200	SNRNP200	>sp|O75643|U520_HUMAN U5 small nuclear ribonucleoprotein 200 kDa helicase OS=Homo sapiens OX=9606 GN=SNRNP200 PE=1 SV=2	>sp|O75643|U520_HUMAN U5 small nuclear ribonucleoprotein 200 kDa helicase OS=Homo sapiens OX=9606 GN=SNRNP200 PE=1 SV=2	55	73	0	2136	2136	sp|O75643|SNRNP200	sp|O75643|SNRNP200	SNRNP200_55	SNRNP200_73	SNRNP200-55-SNRNP200-73	>sp|O75643|U520_HUMAN U5 small nuclear ribonucleoprotein 200 kDa helicase OS=Homo sapiens OX=9606 GN=SNRNP200 PE=1 SV=2-55->sp|O75643|U520_HUMAN U5 small nuclear ribonucleoprotein 200 kDa helicase OS=Homo sapiens OX=9606 GN=SNRNP200 PE=1 SV=2-73	target	1
49-1-2-1-21-1	F1_20200821_HS_1090_FU_1_A12.mgf	13584	4	2581.22	1	QTKEQSQLTATQTR	3	2032	>sp|Q6P2Q9|PRP8_HUMAN Pre-mRNA-processing-splicing factor 8 OS=Homo sapiens OX=9606 GN=PRPF8 PE=1 SV=2	1618.83	1.15211e-44	1.15211e-44	MGDKAQR	4	52	>sp|O75643|U520_HUMAN U5 small nuclear ribonucleoprotein 200 kDa helicase OS=Homo sapiens OX=9606 GN=SNRNP200 PE=1 SV=2	804.391	1.98812e-12	2.3653e-25	MGDKAQR-4-QTKEQSQLTATQTR-3	PRPF8	SNRNP200	>sp|Q6P2Q9|PRP8_HUMAN Pre-mRNA-processing-splicing factor 8 OS=Homo sapiens OX=9606 GN=PRPF8 PE=1 SV=2	>sp|O75643|U520_HUMAN U5 small nuclear ribonucleoprotein 200 kDa helicase OS=Homo sapiens OX=9606 GN=SNRNP200 PE=1 SV=2	2034	55	0	2335	2136	sp|Q6P2Q9|PRPF8	sp|O75643|SNRNP200	PRPF8_2034	SNRNP200_55	PRPF8-2034-SNRNP200-55	>sp|O75643|U520_HUMAN U5 small nuclear ribonucleoprotein 200 kDa helicase OS=Homo sapiens OX=9606 GN=SNRNP200 PE=1 SV=2-55->sp|Q6P2Q9|PRP8_HUMAN Pre-mRNA-processing-splicing factor 8 OS=Homo sapiens OX=9606 GN=PRPF8 PE=1 SV=2-2034	target	1
92-1-4-1-62-1	F1_20200821_HS_1090_FU_1_A10.mgf	46593	4	3841.85	1	KVTFQGVGDEEDEDEIIVPK	1	5	>sp|O95400|CD2B2_HUMAN CD2 antigen cytoplasmic tail-binding protein 2 OS=Homo sapiens OX=9606 GN=CD2BP2 PE=1 SV=1	2246.1	1.23547e-29	7.58263e-32	SLVQEMVGSFGKR	12	546	>sp|O75643|U520_HUMAN U5 small nuclear ribonucleoprotein 200 kDa helicase OS=Homo sapiens OX=9606 GN=SNRNP200 PE=1 SV=2	1436.74	8.41421e-33	1.78886e-36	SLVQEMVGSFGKR-12-KVTFQGVGDEEDEDEIIVPK-1	CD2BP2	SNRNP200	>sp|O95400|CD2B2_HUMAN CD2 antigen cytoplasmic tail-binding protein 2 OS=Homo sapiens OX=9606 GN=CD2BP2 PE=1 SV=1	>sp|O75643|U520_HUMAN U5 small nuclear ribonucleoprotein 200 kDa helicase OS=Homo sapiens OX=9606 GN=SNRNP200 PE=1 SV=2	5	557	0	341	2136	sp|O95400|CD2BP2	sp|O75643|SNRNP200	CD2BP2_5	SNRNP200_557	CD2BP2-5-SNRNP200-557	>sp|O75643|U520_HUMAN U5 small nuclear ribonucleoprotein 200 kDa helicase OS=Homo sapiens OX=9606 GN=SNRNP200 PE=1 SV=2-557->sp|O95400|CD2B2_HUMAN CD2 antigen cytoplasmic tail-binding protein 2 OS=Homo sapiens OX=9606 GN=CD2BP2 PE=1 SV=1-5	target	1
196-1-1-1-4-1	F1_20200821_HS_1090_FU_1_A11.mgf	5552	5	2744.26	1	TKPQMoQEER	2	59	>sp|O75643|U520_HUMAN U5 small nuclear ribonucleoprotein 200 kDa helicase OS=Homo sapiens OX=9606 GN=SNRNP200 PE=1 SV=2	1161.54	1.87543e-16	1.87543e-16	KRDEDRHDINK	1	73	>sp|O75643|U520_HUMAN U5 small nuclear ribonucleoprotein 200 kDa helicase OS=Homo sapiens OX=9606 GN=SNRNP200 PE=1 SV=2	1424.71	1.19339e-09	5.57201e-21	TKPQMoQEER-2-KRDEDRHDINK-1	SNRNP200	SNRNP200	>sp|O75643|U520_HUMAN U5 small nuclear ribonucleoprotein 200 kDa helicase OS=Homo sapiens OX=9606 GN=SNRNP200 PE=1 SV=2	>sp|O75643|U520_HUMAN U5 small nuclear ribonucleoprotein 200 kDa helicase OS=Homo sapiens OX=9606 GN=SNRNP200 PE=1 SV=2	60	73	0	2136	2136	sp|O75643|SNRNP200	sp|O75643|SNRNP200	SNRNP200_60	SNRNP200_73	SNRNP200-60-SNRNP200-73	>sp|O75643|U520_HUMAN U5 small nuclear ribonucleoprotein 200 kDa helicase OS=Homo sapiens OX=9606 GN=SNRNP200 PE=1 SV=2-60->sp|O75643|U520_HUMAN U5 small nuclear ribonucleoprotein 200 kDa helicase OS=Homo sapiens OX=9606 GN=SNRNP200 PE=1 SV=2-73	target	1
27-1-2-1-11-1	F1_20200821_HS_1090_FU_1_A9.mgf	21046	4	4090.87	1	TVNKHGDEIITSTTSNYETQTFSSK	4	2046	>sp|Q6P2Q9|PRP8_HUMAN Pre-mRNA-processing-splicing factor 8 OS=Homo sapiens OX=9606 GN=PRPF8 PE=1 SV=2	2787.32	1.39743e-55	2.56737e-72	TKPQMQEER	2	59	>sp|O75643|U520_HUMAN U5 small nuclear ribonucleoprotein 200 kDa helicase OS=Homo sapiens OX=9606 GN=SNRNP200 PE=1 SV=2	1145.55	9.10143e-15	2.98481e-22	TKPQMQEER-2-TVNKHGDEIITSTTSNYETQTFSSK-4	PRPF8	SNRNP200	>sp|Q6P2Q9|PRP8_HUMAN Pre-mRNA-processing-splicing factor 8 OS=Homo sapiens OX=9606 GN=PRPF8 PE=1 SV=2	>sp|O75643|U520_HUMAN U5 small nuclear ribonucleoprotein 200 kDa helicase OS=Homo sapiens OX=9606 GN=SNRNP200 PE=1 SV=2	2049	60	0	2335	2136	sp|Q6P2Q9|PRPF8	sp|O75643|SNRNP200	PRPF8_2049	SNRNP200_60	PRPF8-2049-SNRNP200-60	>sp|O75643|U520_HUMAN U5 small nuclear ribonucleoprotein 200 kDa helicase OS=Homo sapiens OX=9606 GN=SNRNP200 PE=1 SV=2-60->sp|Q6P2Q9|PRP8_HUMAN Pre-mRNA-processing-splicing factor 8 OS=Homo sapiens OX=9606 GN=PRPF8 PE=1 SV=2-2049	target	1
329-1-4-1-8-1	F1_20200821_HS_1090_FU_1_A8.mgf	31826	6	5935.16	1	IMEHAGKNQVLVFVHSR	7	712	>sp|O75643|U520_HUMAN U5 small nuclear ribonucleoprotein 200 kDa helicase OS=Homo sapiens OX=9606 GN=SNRNP200 PE=1 SV=2	1964.04	2.58237e-54	5.68415e-79	TLVEDLFADKHIQVLVSTATLAWGVNLPAHTVIIK	10	795	>sp|O75643|U520_HUMAN U5 small nuclear ribonucleoprotein 200 kDa helicase OS=Homo sapiens OX=9606 GN=SNRNP200 PE=1 SV=2	3812.12	1.06916e-55	1.06916e-55	IMEHAGKNQVLVFVHSR-7-TLVEDLFADKHIQVLVSTATLAWGVNLPAHTVIIK-10	SNRNP200	SNRNP200	>sp|O75643|U520_HUMAN U5 small nuclear ribonucleoprotein 200 kDa helicase OS=Homo sapiens OX=9606 GN=SNRNP200 PE=1 SV=2	>sp|O75643|U520_HUMAN U5 small nuclear ribonucleoprotein 200 kDa helicase OS=Homo sapiens OX=9606 GN=SNRNP200 PE=1 SV=2	718	804	0	2136	2136	sp|O75643|SNRNP200	sp|O75643|SNRNP200	SNRNP200_718	SNRNP200_804	SNRNP200-718-SNRNP200-804	>sp|O75643|U520_HUMAN U5 small nuclear ribonucleoprotein 200 kDa helicase OS=Homo sapiens OX=9606 GN=SNRNP200 PE=1 SV=2-718->sp|O75643|U520_HUMAN U5 small nuclear ribonucleoprotein 200 kDa helicase OS=Homo sapiens OX=9606 GN=SNRNP200 PE=1 SV=2-804	target	1
27-1-1-1-4-1	F1_20200821_HS_1090_FU_1_A12.mgf	16720	5	2410.27	1	LLLKSVR	4	296	>sp|O94906|PRP6_HUMAN Pre-mRNA-processing factor 6 OS=Homo sapiens OX=9606 GN=PRPF6 PE=1 SV=1	827.559	2.36596e-12	2.36596e-12	KRDEDRHDINK	1	73	>sp|O75643|U520_HUMAN U5 small nuclear ribonucleoprotein 200 kDa helicase OS=Homo sapiens OX=9606 GN=SNRNP200 PE=1 SV=2	1424.71	7.20203e-15	3.57284e-19	LLLKSVR-4-KRDEDRHDINK-1	PRPF6	SNRNP200	>sp|O94906|PRP6_HUMAN Pre-mRNA-processing factor 6 OS=Homo sapiens OX=9606 GN=PRPF6 PE=1 SV=1	>sp|O75643|U520_HUMAN U5 small nuclear ribonucleoprotein 200 kDa helicase OS=Homo sapiens OX=9606 GN=SNRNP200 PE=1 SV=2	299	73	0	941	2136	sp|O94906|PRPF6	sp|O75643|SNRNP200	PRPF6_299	SNRNP200_73	PRPF6-299-SNRNP200-73	>sp|O75643|U520_HUMAN U5 small nuclear ribonucleoprotein 200 kDa helicase OS=Homo sapiens OX=9606 GN=SNRNP200 PE=1 SV=2-73->sp|O94906|PRP6_HUMAN Pre-mRNA-processing factor 6 OS=Homo sapiens OX=9606 GN=PRPF6 PE=1 SV=1-299	target	1
396-1-4-1-21-1	F1_20200821_HS_1090_FU_1_A11.mgf	9905	5	3201.54	1	QTKEQSQLTATQTR	3	2032	>sp|Q6P2Q9|PRP8_HUMAN Pre-mRNA-processing-splicing factor 8 OS=Homo sapiens OX=9606 GN=PRPF8 PE=1 SV=2	1618.83	8.58479e-38	8.58479e-38	KRDEDRHDINK	1	73	>sp|O75643|U520_HUMAN U5 small nuclear ribonucleoprotein 200 kDa helicase OS=Homo sapiens OX=9606 GN=SNRNP200 PE=1 SV=2	1424.71	2.1785e-18	1.15665e-27	KRDEDRHDINK-1-QTKEQSQLTATQTR-3	PRPF8	SNRNP200	>sp|Q6P2Q9|PRP8_HUMAN Pre-mRNA-processing-splicing factor 8 OS=Homo sapiens OX=9606 GN=PRPF8 PE=1 SV=2	>sp|O75643|U520_HUMAN U5 small nuclear ribonucleoprotein 200 kDa helicase OS=Homo sapiens OX=9606 GN=SNRNP200 PE=1 SV=2	2034	73	0	2335	2136	sp|Q6P2Q9|PRPF8	sp|O75643|SNRNP200	PRPF8_2034	SNRNP200_73	PRPF8-2034-SNRNP200-73	>sp|O75643|U520_HUMAN U5 small nuclear ribonucleoprotein 200 kDa helicase OS=Homo sapiens OX=9606 GN=SNRNP200 PE=1 SV=2-73->sp|Q6P2Q9|PRP8_HUMAN Pre-mRNA-processing-splicing factor 8 OS=Homo sapiens OX=9606 GN=PRPF8 PE=1 SV=2-2034	target	1
160-1-9-1-21-1	F1_20200821_HS_1090_FU_1_A11.mgf	10692	4	2666.33	1	QTKEQSQLTATQTR	3	2032	>sp|Q6P2Q9|PRP8_HUMAN Pre-mRNA-processing-splicing factor 8 OS=Homo sapiens OX=9606 GN=PRPF8 PE=1 SV=2	1618.83	8.86266e-41	2.13462e-47	KETGKTAR	5	729	>sp|O75643|U520_HUMAN U5 small nuclear ribonucleoprotein 200 kDa helicase OS=Homo sapiens OX=9606 GN=SNRNP200 PE=1 SV=2	889.498	4.18194e-10	7.31638e-19	KETGKTAR-5-QTKEQSQLTATQTR-3	PRPF8	SNRNP200	>sp|Q6P2Q9|PRP8_HUMAN Pre-mRNA-processing-splicing factor 8 OS=Homo sapiens OX=9606 GN=PRPF8 PE=1 SV=2	>sp|O75643|U520_HUMAN U5 small nuclear ribonucleoprotein 200 kDa helicase OS=Homo sapiens OX=9606 GN=SNRNP200 PE=1 SV=2	2034	733	0	2335	2136	sp|Q6P2Q9|PRPF8	sp|O75643|SNRNP200	PRPF8_2034	SNRNP200_733	PRPF8-2034-SNRNP200-733	>sp|O75643|U520_HUMAN U5 small nuclear ribonucleoprotein 200 kDa helicase OS=Homo sapiens OX=9606 GN=SNRNP200 PE=1 SV=2-733->sp|Q6P2Q9|PRP8_HUMAN Pre-mRNA-processing-splicing factor 8 OS=Homo sapiens OX=9606 GN=PRPF8 PE=1 SV=2-2034	target	1
253-1-3-1-11-1	F1_20200821_HS_1090_FU_1_A9.mgf	24696	4	4408.03	1	TVNKHGDEIITSTTSNYETQTFSSK	4	2046	>sp|Q6P2Q9|PRP8_HUMAN Pre-mRNA-processing-splicing factor 8 OS=Homo sapiens OX=9606 GN=PRPF8 PE=1 SV=2	2787.32	3.53895e-29	3.53895e-29	TEAEQCKNLELK	7	764	>sp|O75643|U520_HUMAN U5 small nuclear ribonucleoprotein 200 kDa helicase OS=Homo sapiens OX=9606 GN=SNRNP200 PE=1 SV=2	1461.71	0.000788589	8.12917e-16	TEAEQCKNLELK-7-TVNKHGDEIITSTTSNYETQTFSSK-4	PRPF8	SNRNP200	>sp|Q6P2Q9|PRP8_HUMAN Pre-mRNA-processing-splicing factor 8 OS=Homo sapiens OX=9606 GN=PRPF8 PE=1 SV=2	>sp|O75643|U520_HUMAN U5 small nuclear ribonucleoprotein 200 kDa helicase OS=Homo sapiens OX=9606 GN=SNRNP200 PE=1 SV=2	2049	770	0	2335	2136	sp|Q6P2Q9|PRPF8	sp|O75643|SNRNP200	PRPF8_2049	SNRNP200_770	PRPF8-2049-SNRNP200-770	>sp|O75643|U520_HUMAN U5 small nuclear ribonucleoprotein 200 kDa helicase OS=Homo sapiens OX=9606 GN=SNRNP200 PE=1 SV=2-770->sp|Q6P2Q9|PRP8_HUMAN Pre-mRNA-processing-splicing factor 8 OS=Homo sapiens OX=9606 GN=PRPF8 PE=1 SV=2-2049	target	1
30-2-3-1-5-1	F1_20200821_HS_1090_FU_1_A12.mgf	26774	4	2499.24	1	NNLVKYDK	5	967	>sp|O75643|U520_HUMAN U5 small nuclear ribonucleoprotein 200 kDa helicase OS=Homo sapiens OX=9606 GN=SNRNP200 PE=1 SV=2	992.529	2.8528e-18	4.99102e-27	KTGNFQVTELGR	1	975	>sp|O75643|U520_HUMAN U5 small nuclear ribonucleoprotein 200 kDa helicase OS=Homo sapiens OX=9606 GN=SNRNP200 PE=1 SV=2	1348.71	7.44304e-34	1.06269e-39	NNLVKYDK-5-KTGNFQVTELGR-1	SNRNP200	SNRNP200	>sp|O75643|U520_HUMAN U5 small nuclear ribonucleoprotein 200 kDa helicase OS=Homo sapiens OX=9606 GN=SNRNP200 PE=1 SV=2	>sp|O75643|U520_HUMAN U5 small nuclear ribonucleoprotein 200 kDa helicase OS=Homo sapiens OX=9606 GN=SNRNP200 PE=1 SV=2	971	975	0	2136	2136	sp|O75643|SNRNP200	sp|O75643|SNRNP200	SNRNP200_971	SNRNP200_975	SNRNP200-971-SNRNP200-975	>sp|O75643|U520_HUMAN U5 small nuclear ribonucleoprotein 200 kDa helicase OS=Homo sapiens OX=9606 GN=SNRNP200 PE=1 SV=2-971->sp|O75643|U520_HUMAN U5 small nuclear ribonucleoprotein 200 kDa helicase OS=Homo sapiens OX=9606 GN=SNRNP200 PE=1 SV=2-975	target	1
343-1-3-1-27-1	F1_20200821_HS_1090_FU_1_A11.mgf	29720	4	2820.4	1	NMQLTAGSKLR	9	169	>sp|O75934|SPF27_HUMAN Pre-mRNA-splicing factor SPF27 OS=Homo sapiens OX=9606 GN=BCAS2 PE=1 SV=1	1217.66	8.23656e-30	8.23656e-30	RLECLKEDVQR	6	766	>sp|Q99459|CDC5L_HUMAN Cell division cycle 5-like protein OS=Homo sapiens OX=9606 GN=CDC5L PE=1 SV=2	1444.75	1	1.53512e-15	NMQLTAGSKLR-9-RLECLKEDVQR-6	BCAS2	CDC5L	>sp|O75934|SPF27_HUMAN Pre-mRNA-splicing factor SPF27 OS=Homo sapiens OX=9606 GN=BCAS2 PE=1 SV=1	>sp|Q99459|CDC5L_HUMAN Cell division cycle 5-like protein OS=Homo sapiens OX=9606 GN=CDC5L PE=1 SV=2	177	771	0	225	802	sp|O75934|BCAS2	sp|Q99459|CDC5L	BCAS2_177	CDC5L_771	BCAS2-177-CDC5L-771	>sp|O75934|SPF27_HUMAN Pre-mRNA-splicing factor SPF27 OS=Homo sapiens OX=9606 GN=BCAS2 PE=1 SV=1-177->sp|Q99459|CDC5L_HUMAN Cell division cycle 5-like protein OS=Homo sapiens OX=9606 GN=CDC5L PE=1 SV=2-771	target	1
358-1-2-1-6-1	F1_20200821_HS_1090_FU_1_B1.mgf	9612	4	1923.97	1	YIQQKR	5	316	>sp|O94776|MTA2_HUMAN Metastasis-associated protein MTA2 OS=Homo sapiens OX=9606 GN=MTA2 PE=1 SV=1	834.471	2.31313e-10	1.93259e-16	LKAAEADSK	2	322	>sp|O94776|MTA2_HUMAN Metastasis-associated protein MTA2 OS=Homo sapiens OX=9606 GN=MTA2 PE=1 SV=1	931.497	7.35851e-22	1.40201e-35	YIQQKR-5-LKAAEADSK-2	MTA2	MTA2	>sp|O94776|MTA2_HUMAN Metastasis-associated protein MTA2 OS=Homo sapiens OX=9606 GN=MTA2 PE=1 SV=1	>sp|O94776|MTA2_HUMAN Metastasis-associated protein MTA2 OS=Homo sapiens OX=9606 GN=MTA2 PE=1 SV=1	320	323	0	668	668	sp|O94776|MTA2	sp|O94776|MTA2	MTA2_320	MTA2_323	MTA2-320-MTA2-323	>sp|O94776|MTA2_HUMAN Metastasis-associated protein MTA2 OS=Homo sapiens OX=9606 GN=MTA2 PE=1 SV=1-320->sp|O94776|MTA2_HUMAN Metastasis-associated protein MTA2 OS=Homo sapiens OX=9606 GN=MTA2 PE=1 SV=1-323	target	1
408-1-6-1-1-1	F1_20200821_HS_1090_FU_1_A11.mgf	19078	4	2875.44	1	RIEELNKTANGNVEAK	7	26	>sp|O94776|MTA2_HUMAN Metastasis-associated protein MTA2 OS=Homo sapiens OX=9606 GN=MTA2 PE=1 SV=1,>sp|Q13330|MTA1_HUMAN Metastasis-associated protein MTA1 OS=Homo sapiens OX=9606 GN=MTA1 PE=1 SV=2	1784.94	1.4896e-36	9.22086e-60	LKAAEADSK	2	322	>sp|O94776|MTA2_HUMAN Metastasis-associated protein MTA2 OS=Homo sapiens OX=9606 GN=MTA2 PE=1 SV=1	931.497	1.8775e-26	5.78198e-39	LKAAEADSK-2-RIEELNKTANGNVEAK-7	MTA2	MTA2	>sp|O94776|MTA2_HUMAN Metastasis-associated protein MTA2 OS=Homo sapiens OX=9606 GN=MTA2 PE=1 SV=1	>sp|O94776|MTA2_HUMAN Metastasis-associated protein MTA2 OS=Homo sapiens OX=9606 GN=MTA2 PE=1 SV=1	32	323	1	668	668	sp|O94776|MTA2	sp|O94776|MTA2	MTA2_32	MTA2_323	MTA2-32-MTA2-323	>sp|O94776|MTA2_HUMAN Metastasis-associated protein MTA2 OS=Homo sapiens OX=9606 GN=MTA2 PE=1 SV=1-323->sp|O94776|MTA2_HUMAN Metastasis-associated protein MTA2 OS=Homo sapiens OX=9606 GN=MTA2 PE=1 SV=1,>sp|Q13330|MTA1_HUMAN Metastasis-associated protein MTA1 OS=Homo sapiens OX=9606 GN=MTA1 PE=1 SV=2-32	target	1
456-1-5-1-5-1	F1_20200821_HS_1090_FU_1_A10.mgf	39878	4	3279.66	1	LNPADAPNPVVFVATKDTR	16	596	>sp|O94776|MTA2_HUMAN Metastasis-associated protein MTA2 OS=Homo sapiens OX=9606 GN=MTA2 PE=1 SV=1	2024.07	3.6339e-18	3.6339e-18	KALTHLEMR	1	618	>sp|O94776|MTA2_HUMAN Metastasis-associated protein MTA2 OS=Homo sapiens OX=9606 GN=MTA2 PE=1 SV=1	1097.6	2.67465e-06	2.06191e-24	KALTHLEMR-1-LNPADAPNPVVFVATKDTR-16	MTA2	MTA2	>sp|O94776|MTA2_HUMAN Metastasis-associated protein MTA2 OS=Homo sapiens OX=9606 GN=MTA2 PE=1 SV=1	>sp|O94776|MTA2_HUMAN Metastasis-associated protein MTA2 OS=Homo sapiens OX=9606 GN=MTA2 PE=1 SV=1	611	618	0	668	668	sp|O94776|MTA2	sp|O94776|MTA2	MTA2_611	MTA2_618	MTA2-611-MTA2-618	>sp|O94776|MTA2_HUMAN Metastasis-associated protein MTA2 OS=Homo sapiens OX=9606 GN=MTA2 PE=1 SV=1-611->sp|O94776|MTA2_HUMAN Metastasis-associated protein MTA2 OS=Homo sapiens OX=9606 GN=MTA2 PE=1 SV=1-618	target	1
145-1-3-1-2-1	F1_20200821_HS_1090_FU_1_A11.mgf	13685	4	2881.34	1	EFEEESKQPGVSEQQR	7	65	>sp|O94776|MTA2_HUMAN Metastasis-associated protein MTA2 OS=Homo sapiens OX=9606 GN=MTA2 PE=1 SV=1	1905.87	1.53874e-48	7.1332e-50	HQLKHR	4	81	>sp|O94776|MTA2_HUMAN Metastasis-associated protein MTA2 OS=Homo sapiens OX=9606 GN=MTA2 PE=1 SV=1,>sp|Q9BTC8|MTA3_HUMAN Metastasis-associated protein MTA3 OS=Homo sapiens OX=9606 GN=MTA3 PE=1 SV=2	817.467	3.61218e-08	2.46219e-17	HQLKHR-4-EFEEESKQPGVSEQQR-7	MTA2	MTA2	>sp|O94776|MTA2_HUMAN Metastasis-associated protein MTA2 OS=Homo sapiens OX=9606 GN=MTA2 PE=1 SV=1	>sp|O94776|MTA2_HUMAN Metastasis-associated protein MTA2 OS=Homo sapiens OX=9606 GN=MTA2 PE=1 SV=1	71	84	1	668	668	sp|O94776|MTA2	sp|O94776|MTA2	MTA2_71	MTA2_84	MTA2-71-MTA2-84	>sp|O94776|MTA2_HUMAN Metastasis-associated protein MTA2 OS=Homo sapiens OX=9606 GN=MTA2 PE=1 SV=1-71->sp|O94776|MTA2_HUMAN Metastasis-associated protein MTA2 OS=Homo sapiens OX=9606 GN=MTA2 PE=1 SV=1,>sp|Q9BTC8|MTA3_HUMAN Metastasis-associated protein MTA3 OS=Homo sapiens OX=9606 GN=MTA3 PE=1 SV=2-84	target	1
29-1-6-1-6-1	F1_20200821_HS_1090_FU_1_A11.mgf	27248	4	2808.36	1	EKEEIEK	2	124	>sp|O94906|PRP6_HUMAN Pre-mRNA-processing factor 6 OS=Homo sapiens OX=9606 GN=PRPF6 PE=1 SV=1	903.455	2.89481e-08	1.16383e-11	MERPKIQQQFSDLK	5	133	>sp|O94906|PRP6_HUMAN Pre-mRNA-processing factor 6 OS=Homo sapiens OX=9606 GN=PRPF6 PE=1 SV=1	1746.91	3.90645e-45	3.07733e-62	EKEEIEK-2-MERPKIQQQFSDLK-5	PRPF6	PRPF6	>sp|O94906|PRP6_HUMAN Pre-mRNA-processing factor 6 OS=Homo sapiens OX=9606 GN=PRPF6 PE=1 SV=1	>sp|O94906|PRP6_HUMAN Pre-mRNA-processing factor 6 OS=Homo sapiens OX=9606 GN=PRPF6 PE=1 SV=1	125	137	0	941	941	sp|O94906|PRPF6	sp|O94906|PRPF6	PRPF6_125	PRPF6_137	PRPF6-125-PRPF6-137	>sp|O94906|PRP6_HUMAN Pre-mRNA-processing factor 6 OS=Homo sapiens OX=9606 GN=PRPF6 PE=1 SV=1-125->sp|O94906|PRP6_HUMAN Pre-mRNA-processing factor 6 OS=Homo sapiens OX=9606 GN=PRPF6 PE=1 SV=1-137	target	1
465-1-6-1-12-1	F1_20200821_HS_1090_FU_1_A12.mgf	23094	4	2103	1	EKEEIEK	2	124	>sp|O94906|PRP6_HUMAN Pre-mRNA-processing factor 6 OS=Homo sapiens OX=9606 GN=PRPF6 PE=1 SV=1	903.455	4.16404e-08	6.56796e-11	TYKENFLK	3	432	>sp|Q53GS9|SNUT2_HUMAN U4/U6.U5 tri-snRNP-associated protein 2 OS=Homo sapiens OX=9606 GN=USP39 PE=1 SV=2	1041.55	2.86784e-16	3.54918e-19	EKEEIEK-2-TYKENFLK-3	PRPF6	USP39	>sp|O94906|PRP6_HUMAN Pre-mRNA-processing factor 6 OS=Homo sapiens OX=9606 GN=PRPF6 PE=1 SV=1	>sp|Q53GS9|SNUT2_HUMAN U4/U6.U5 tri-snRNP-associated protein 2 OS=Homo sapiens OX=9606 GN=USP39 PE=1 SV=2	125	434	0	941	565	sp|O94906|PRPF6	sp|Q53GS9|USP39	PRPF6_125	USP39_434	PRPF6-125-USP39-434	>sp|O94906|PRP6_HUMAN Pre-mRNA-processing factor 6 OS=Homo sapiens OX=9606 GN=PRPF6 PE=1 SV=1-125->sp|Q53GS9|SNUT2_HUMAN U4/U6.U5 tri-snRNP-associated protein 2 OS=Homo sapiens OX=9606 GN=USP39 PE=1 SV=2-434	target	1
462-1-3-1-6-1	F1_20200821_HS_1090_FU_1_A11.mgf	8651	4	1786.87	1	EKEEIEK	2	124	>sp|O94906|PRP6_HUMAN Pre-mRNA-processing factor 6 OS=Homo sapiens OX=9606 GN=PRPF6 PE=1 SV=1	903.455	6.75797e-11	6.75797e-11	HSKGVAK	3	664	>sp|Q6P2Q9|PRP8_HUMAN Pre-mRNA-processing-splicing factor 8 OS=Homo sapiens OX=9606 GN=PRPF8 PE=1 SV=2	725.418	1.07783e-08	1.24086e-17	HSKGVAK-3-EKEEIEK-2	PRPF6	PRPF8	>sp|O94906|PRP6_HUMAN Pre-mRNA-processing factor 6 OS=Homo sapiens OX=9606 GN=PRPF6 PE=1 SV=1	>sp|Q6P2Q9|PRP8_HUMAN Pre-mRNA-processing-splicing factor 8 OS=Homo sapiens OX=9606 GN=PRPF8 PE=1 SV=2	125	666	0	941	2335	sp|O94906|PRPF6	sp|Q6P2Q9|PRPF8	PRPF6_125	PRPF8_666	PRPF6-125-PRPF8-666	>sp|O94906|PRP6_HUMAN Pre-mRNA-processing factor 6 OS=Homo sapiens OX=9606 GN=PRPF6 PE=1 SV=1-125->sp|Q6P2Q9|PRP8_HUMAN Pre-mRNA-processing-splicing factor 8 OS=Homo sapiens OX=9606 GN=PRPF8 PE=1 SV=2-666	target	1
144-1-3-1-6-1	F1_20200821_HS_1090_FU_1_A11.mgf	27603	5	3127.53	1	EKEEIEKYR	7	124	>sp|O94906|PRP6_HUMAN Pre-mRNA-processing factor 6 OS=Homo sapiens OX=9606 GN=PRPF6 PE=1 SV=1	1222.62	2.32167e-31	2.30077e-42	MERPKIQQQFSDLK	5	133	>sp|O94906|PRP6_HUMAN Pre-mRNA-processing factor 6 OS=Homo sapiens OX=9606 GN=PRPF6 PE=1 SV=1	1746.91	6.01073e-33	6.01073e-33	EKEEIEKYR-7-MERPKIQQQFSDLK-5	PRPF6	PRPF6	>sp|O94906|PRP6_HUMAN Pre-mRNA-processing factor 6 OS=Homo sapiens OX=9606 GN=PRPF6 PE=1 SV=1	>sp|O94906|PRP6_HUMAN Pre-mRNA-processing factor 6 OS=Homo sapiens OX=9606 GN=PRPF6 PE=1 SV=1	130	137	0	941	941	sp|O94906|PRPF6	sp|O94906|PRPF6	PRPF6_130	PRPF6_137	PRPF6-130-PRPF6-137	>sp|O94906|PRP6_HUMAN Pre-mRNA-processing factor 6 OS=Homo sapiens OX=9606 GN=PRPF6 PE=1 SV=1-130->sp|O94906|PRP6_HUMAN Pre-mRNA-processing factor 6 OS=Homo sapiens OX=9606 GN=PRPF6 PE=1 SV=1-137	target	1
64-1-3-1-4-1	F1_20200821_HS_1090_FU_1_A12.mgf	26881	4	2653.27	1	EKEEIEKYR	7	124	>sp|O94906|PRP6_HUMAN Pre-mRNA-processing factor 6 OS=Homo sapiens OX=9606 GN=PRPF6 PE=1 SV=1	1222.62	2.46026e-30	5.44138e-40	FTKNNFFVEK	3	457	>sp|Q53GS9|SNUT2_HUMAN U4/U6.U5 tri-snRNP-associated protein 2 OS=Homo sapiens OX=9606 GN=USP39 PE=1 SV=2	1272.65	1.31911e-29	1.31911e-29	EKEEIEKYR-7-FTKNNFFVEK-3	PRPF6	USP39	>sp|O94906|PRP6_HUMAN Pre-mRNA-processing factor 6 OS=Homo sapiens OX=9606 GN=PRPF6 PE=1 SV=1	>sp|Q53GS9|SNUT2_HUMAN U4/U6.U5 tri-snRNP-associated protein 2 OS=Homo sapiens OX=9606 GN=USP39 PE=1 SV=2	130	459	0	941	565	sp|O94906|PRPF6	sp|Q53GS9|USP39	PRPF6_130	USP39_459	PRPF6-130-USP39-459	>sp|O94906|PRP6_HUMAN Pre-mRNA-processing factor 6 OS=Homo sapiens OX=9606 GN=PRPF6 PE=1 SV=1-130->sp|Q53GS9|SNUT2_HUMAN U4/U6.U5 tri-snRNP-associated protein 2 OS=Homo sapiens OX=9606 GN=USP39 PE=1 SV=2-459	target	1
312-1-1-1-6-1	F1_20200821_HS_1090_FU_1_A11.mgf	23451	4	2666.34	1	MERPKIQQQFSDLK	5	133	>sp|O94906|PRP6_HUMAN Pre-mRNA-processing factor 6 OS=Homo sapiens OX=9606 GN=PRPF6 PE=1 SV=1	1746.91	1.12333e-23	3.32063e-40	HAPPGKR	6	48	>sp|O94906|PRP6_HUMAN Pre-mRNA-processing factor 6 OS=Homo sapiens OX=9606 GN=PRPF6 PE=1 SV=1	761.43	1.21442e-06	8.81476e-15	HAPPGKR-6-MERPKIQQQFSDLK-5	PRPF6	PRPF6	>sp|O94906|PRP6_HUMAN Pre-mRNA-processing factor 6 OS=Homo sapiens OX=9606 GN=PRPF6 PE=1 SV=1	>sp|O94906|PRP6_HUMAN Pre-mRNA-processing factor 6 OS=Homo sapiens OX=9606 GN=PRPF6 PE=1 SV=1	137	53	0	941	941	sp|O94906|PRPF6	sp|O94906|PRPF6	PRPF6_137	PRPF6_53	PRPF6-137-PRPF6-53	>sp|O94906|PRP6_HUMAN Pre-mRNA-processing factor 6 OS=Homo sapiens OX=9606 GN=PRPF6 PE=1 SV=1-137->sp|O94906|PRP6_HUMAN Pre-mRNA-processing factor 6 OS=Homo sapiens OX=9606 GN=PRPF6 PE=1 SV=1-53	target	1
279-1-12-1-1-1	F1_20200821_HS_1090_FU_1_A11.mgf	31059	5	3102.56	1	MERPKIQQQFSDLKR	5	133	>sp|O94906|PRP6_HUMAN Pre-mRNA-processing factor 6 OS=Homo sapiens OX=9606 GN=PRPF6 PE=1 SV=1	1903.01	1.7492e-34	2.24205e-47	TYKENFLK	3	432	>sp|Q53GS9|SNUT2_HUMAN U4/U6.U5 tri-snRNP-associated protein 2 OS=Homo sapiens OX=9606 GN=USP39 PE=1 SV=2	1041.55	4.89772e-15	4.89772e-15	TYKENFLK-3-MERPKIQQQFSDLKR-5	PRPF6	USP39	>sp|O94906|PRP6_HUMAN Pre-mRNA-processing factor 6 OS=Homo sapiens OX=9606 GN=PRPF6 PE=1 SV=1	>sp|Q53GS9|SNUT2_HUMAN U4/U6.U5 tri-snRNP-associated protein 2 OS=Homo sapiens OX=9606 GN=USP39 PE=1 SV=2	137	434	0	941	565	sp|O94906|PRPF6	sp|Q53GS9|USP39	PRPF6_137	USP39_434	PRPF6-137-USP39-434	>sp|O94906|PRP6_HUMAN Pre-mRNA-processing factor 6 OS=Homo sapiens OX=9606 GN=PRPF6 PE=1 SV=1-137->sp|Q53GS9|SNUT2_HUMAN U4/U6.U5 tri-snRNP-associated protein 2 OS=Homo sapiens OX=9606 GN=USP39 PE=1 SV=2-434	target	1
351-1-4-1-6-1	F1_20200821_HS_1090_FU_1_A11.mgf	36099	4	3177.56	1	MERPKIQQQFSDLK	5	133	>sp|O94906|PRP6_HUMAN Pre-mRNA-processing factor 6 OS=Homo sapiens OX=9606 GN=PRPF6 PE=1 SV=1	1746.91	2.3626e-32	2.488e-52	FTKNNFFVEK	3	457	>sp|Q53GS9|SNUT2_HUMAN U4/U6.U5 tri-snRNP-associated protein 2 OS=Homo sapiens OX=9606 GN=USP39 PE=1 SV=2	1272.65	2.45279e-25	6.65227e-35	FTKNNFFVEK-3-MERPKIQQQFSDLK-5	PRPF6	USP39	>sp|O94906|PRP6_HUMAN Pre-mRNA-processing factor 6 OS=Homo sapiens OX=9606 GN=PRPF6 PE=1 SV=1	>sp|Q53GS9|SNUT2_HUMAN U4/U6.U5 tri-snRNP-associated protein 2 OS=Homo sapiens OX=9606 GN=USP39 PE=1 SV=2	137	459	0	941	565	sp|O94906|PRPF6	sp|Q53GS9|USP39	PRPF6_137	USP39_459	PRPF6-137-USP39-459	>sp|O94906|PRP6_HUMAN Pre-mRNA-processing factor 6 OS=Homo sapiens OX=9606 GN=PRPF6 PE=1 SV=1-137->sp|Q53GS9|SNUT2_HUMAN U4/U6.U5 tri-snRNP-associated protein 2 OS=Homo sapiens OX=9606 GN=USP39 PE=1 SV=2-459	target	1
263-1-3-1-6-1	F1_20200821_HS_1090_FU_1_A11.mgf	23299	4	2630.32	1	MERPKIQQQFSDLK	5	133	>sp|O94906|PRP6_HUMAN Pre-mRNA-processing factor 6 OS=Homo sapiens OX=9606 GN=PRPF6 PE=1 SV=1	1746.91	6.0567e-45	8.67789e-61	HSKGVAK	3	664	>sp|Q6P2Q9|PRP8_HUMAN Pre-mRNA-processing-splicing factor 8 OS=Homo sapiens OX=9606 GN=PRPF8 PE=1 SV=2	725.418	9.4122e-15	8.3687e-26	HSKGVAK-3-MERPKIQQQFSDLK-5	PRPF6	PRPF8	>sp|O94906|PRP6_HUMAN Pre-mRNA-processing factor 6 OS=Homo sapiens OX=9606 GN=PRPF6 PE=1 SV=1	>sp|Q6P2Q9|PRP8_HUMAN Pre-mRNA-processing-splicing factor 8 OS=Homo sapiens OX=9606 GN=PRPF8 PE=1 SV=2	137	666	0	941	2335	sp|O94906|PRPF6	sp|Q6P2Q9|PRPF8	PRPF6_137	PRPF8_666	PRPF6-137-PRPF8-666	>sp|O94906|PRP6_HUMAN Pre-mRNA-processing factor 6 OS=Homo sapiens OX=9606 GN=PRPF6 PE=1 SV=1-137->sp|Q6P2Q9|PRP8_HUMAN Pre-mRNA-processing-splicing factor 8 OS=Homo sapiens OX=9606 GN=PRPF8 PE=1 SV=2-666	target	1
463-2-17-1-6-1	F1_20200821_HS_1090_FU_1_A11.mgf	27040	4	2707.4	1	MERPKIQQQFSDLK	5	133	>sp|O94906|PRP6_HUMAN Pre-mRNA-processing factor 6 OS=Homo sapiens OX=9606 GN=PRPF6 PE=1 SV=1	1746.91	3.08258e-41	2.29714e-65	GVAKTVTK	4	667	>sp|Q6P2Q9|PRP8_HUMAN Pre-mRNA-processing-splicing factor 8 OS=Homo sapiens OX=9606 GN=PRPF8 PE=1 SV=2	802.491	4.54404e-18	4.54404e-18	GVAKTVTK-4-MERPKIQQQFSDLK-5	PRPF6	PRPF8	>sp|O94906|PRP6_HUMAN Pre-mRNA-processing factor 6 OS=Homo sapiens OX=9606 GN=PRPF6 PE=1 SV=1	>sp|Q6P2Q9|PRP8_HUMAN Pre-mRNA-processing-splicing factor 8 OS=Homo sapiens OX=9606 GN=PRPF8 PE=1 SV=2	137	670	0	941	2335	sp|O94906|PRPF6	sp|Q6P2Q9|PRPF8	PRPF6_137	PRPF8_670	PRPF6-137-PRPF8-670	>sp|O94906|PRP6_HUMAN Pre-mRNA-processing factor 6 OS=Homo sapiens OX=9606 GN=PRPF6 PE=1 SV=1-137->sp|Q6P2Q9|PRP8_HUMAN Pre-mRNA-processing-splicing factor 8 OS=Homo sapiens OX=9606 GN=PRPF8 PE=1 SV=2-670	target	1
437-2-6-1-5-1	F1_20200821_HS_1090_FU_1_A10.mgf	41414	4	3194.59	1	KLVDPVAGSGGPGSR	1	26	>sp|O95400|CD2B2_HUMAN CD2 antigen cytoplasmic tail-binding protein 2 OS=Homo sapiens OX=9606 GN=CD2BP2 PE=1 SV=1	1395.75	2.71347e-37	7.38653e-40	YEKLTPVPDSFFAK	3	176	>sp|O94906|PRP6_HUMAN Pre-mRNA-processing factor 6 OS=Homo sapiens OX=9606 GN=PRPF6 PE=1 SV=1	1640.85	3.64202e-15	2.23527e-17	KLVDPVAGSGGPGSR-1-YEKLTPVPDSFFAK-3	CD2BP2	PRPF6	>sp|O95400|CD2B2_HUMAN CD2 antigen cytoplasmic tail-binding protein 2 OS=Homo sapiens OX=9606 GN=CD2BP2 PE=1 SV=1	>sp|O94906|PRP6_HUMAN Pre-mRNA-processing factor 6 OS=Homo sapiens OX=9606 GN=PRPF6 PE=1 SV=1	26	178	0	341	941	sp|O95400|CD2BP2	sp|O94906|PRPF6	CD2BP2_26	PRPF6_178	CD2BP2-26-PRPF6-178	>sp|O94906|PRP6_HUMAN Pre-mRNA-processing factor 6 OS=Homo sapiens OX=9606 GN=PRPF6 PE=1 SV=1-178->sp|O95400|CD2B2_HUMAN CD2 antigen cytoplasmic tail-binding protein 2 OS=Homo sapiens OX=9606 GN=CD2BP2 PE=1 SV=1-26	target	1
51-1-2-1-3-1	F1_20200821_HS_1090_FU_1_A9.mgf	38553	4	3901.96	1	GYLTDLNSMIPTHGGDINDIKK	21	272	>sp|O94906|PRP6_HUMAN Pre-mRNA-processing factor 6 OS=Homo sapiens OX=9606 GN=PRPF6 PE=1 SV=1	2401.19	2.13119e-56	6.60643e-63	LEEVTGKLQVAR	7	318	>sp|O94906|PRP6_HUMAN Pre-mRNA-processing factor 6 OS=Homo sapiens OX=9606 GN=PRPF6 PE=1 SV=1	1341.76	6.23898e-18	4.86367e-33	LEEVTGKLQVAR-7-GYLTDLNSMIPTHGGDINDIKK-21	PRPF6	PRPF6	>sp|O94906|PRP6_HUMAN Pre-mRNA-processing factor 6 OS=Homo sapiens OX=9606 GN=PRPF6 PE=1 SV=1	>sp|O94906|PRP6_HUMAN Pre-mRNA-processing factor 6 OS=Homo sapiens OX=9606 GN=PRPF6 PE=1 SV=1	292	324	0	941	941	sp|O94906|PRPF6	sp|O94906|PRPF6	PRPF6_292	PRPF6_324	PRPF6-292-PRPF6-324	>sp|O94906|PRP6_HUMAN Pre-mRNA-processing factor 6 OS=Homo sapiens OX=9606 GN=PRPF6 PE=1 SV=1-292->sp|O94906|PRP6_HUMAN Pre-mRNA-processing factor 6 OS=Homo sapiens OX=9606 GN=PRPF6 PE=1 SV=1-324	target	1
144-1-1-1-1-1	F1_20200821_HS_1090_FU_1_A12.mgf	30891	4	2406.25	1	LLLKSVR	4	296	>sp|O94906|PRP6_HUMAN Pre-mRNA-processing factor 6 OS=Homo sapiens OX=9606 GN=PRPF6 PE=1 SV=1	827.559	2.49963e-14	2.49963e-14	NLIMKGTEMCPK	5	330	>sp|O94906|PRP6_HUMAN Pre-mRNA-processing factor 6 OS=Homo sapiens OX=9606 GN=PRPF6 PE=1 SV=1	1420.69	1.00513e-33	1.00513e-33	LLLKSVR-4-NLIMKGTEMCPK-5	PRPF6	PRPF6	>sp|O94906|PRP6_HUMAN Pre-mRNA-processing factor 6 OS=Homo sapiens OX=9606 GN=PRPF6 PE=1 SV=1	>sp|O94906|PRP6_HUMAN Pre-mRNA-processing factor 6 OS=Homo sapiens OX=9606 GN=PRPF6 PE=1 SV=1	299	334	0	941	941	sp|O94906|PRPF6	sp|O94906|PRPF6	PRPF6_299	PRPF6_334	PRPF6-299-PRPF6-334	>sp|O94906|PRP6_HUMAN Pre-mRNA-processing factor 6 OS=Homo sapiens OX=9606 GN=PRPF6 PE=1 SV=1-299->sp|O94906|PRP6_HUMAN Pre-mRNA-processing factor 6 OS=Homo sapiens OX=9606 GN=PRPF6 PE=1 SV=1-334	target	1
483-1-2-1-10-1	F1_20200821_HS_1090_FU_1_A11.mgf	45936	4	2920.6	1	LEEVTGKLQVAR	7	318	>sp|O94906|PRP6_HUMAN Pre-mRNA-processing factor 6 OS=Homo sapiens OX=9606 GN=PRPF6 PE=1 SV=1	1341.76	6.55116e-47	2.44138e-62	HDTKLLILALER	4	834	>sp|Q6P2Q9|PRP8_HUMAN Pre-mRNA-processing-splicing factor 8 OS=Homo sapiens OX=9606 GN=PRPF8 PE=1 SV=2	1420.84	2.20293e-44	2.6093e-66	LEEVTGKLQVAR-7-HDTKLLILALER-4	PRPF6	PRPF8	>sp|O94906|PRP6_HUMAN Pre-mRNA-processing factor 6 OS=Homo sapiens OX=9606 GN=PRPF6 PE=1 SV=1	>sp|Q6P2Q9|PRP8_HUMAN Pre-mRNA-processing-splicing factor 8 OS=Homo sapiens OX=9606 GN=PRPF8 PE=1 SV=2	324	837	0	941	2335	sp|O94906|PRPF6	sp|Q6P2Q9|PRPF8	PRPF6_324	PRPF8_837	PRPF6-324-PRPF8-837	>sp|O94906|PRP6_HUMAN Pre-mRNA-processing factor 6 OS=Homo sapiens OX=9606 GN=PRPF6 PE=1 SV=1-324->sp|Q6P2Q9|PRP8_HUMAN Pre-mRNA-processing-splicing factor 8 OS=Homo sapiens OX=9606 GN=PRPF8 PE=1 SV=2-837	target	1
350-1-2-1-7-1	F1_20200821_HS_1090_FU_1_A11.mgf	32858	4	3051.47	1	KGPGQPSSPQR	1	188	>sp|O95400|CD2B2_HUMAN CD2 antigen cytoplasmic tail-binding protein 2 OS=Homo sapiens OX=9606 GN=CD2BP2 PE=1 SV=1	1137.59	6.47109e-17	1.71759e-29	LWKAAVELEEPEDAR	3	406	>sp|O94906|PRP6_HUMAN Pre-mRNA-processing factor 6 OS=Homo sapiens OX=9606 GN=PRPF6 PE=1 SV=1	1754.88	8.65163e-27	8.65163e-27	KGPGQPSSPQR-1-LWKAAVELEEPEDAR-3	CD2BP2	PRPF6	>sp|O95400|CD2B2_HUMAN CD2 antigen cytoplasmic tail-binding protein 2 OS=Homo sapiens OX=9606 GN=CD2BP2 PE=1 SV=1	>sp|O94906|PRP6_HUMAN Pre-mRNA-processing factor 6 OS=Homo sapiens OX=9606 GN=PRPF6 PE=1 SV=1	188	408	0	341	941	sp|O95400|CD2BP2	sp|O94906|PRPF6	CD2BP2_188	PRPF6_408	CD2BP2-188-PRPF6-408	>sp|O94906|PRP6_HUMAN Pre-mRNA-processing factor 6 OS=Homo sapiens OX=9606 GN=PRPF6 PE=1 SV=1-408->sp|O95400|CD2B2_HUMAN CD2 antigen cytoplasmic tail-binding protein 2 OS=Homo sapiens OX=9606 GN=CD2BP2 PE=1 SV=1-188	target	1
51-1-1-1-1-1	F1_20200821_HS_1090_FU_1_B1.mgf	8334	4	1824.89	1	HAPPGKR	6	48	>sp|O94906|PRP6_HUMAN Pre-mRNA-processing factor 6 OS=Homo sapiens OX=9606 GN=PRPF6 PE=1 SV=1	761.43	2.08362e-08	9.18216e-13	TVGDQMKK	7	55	>sp|O94906|PRP6_HUMAN Pre-mRNA-processing factor 6 OS=Homo sapiens OX=9606 GN=PRPF6 PE=1 SV=1	905.464	1.38541e-28	1.38541e-28	HAPPGKR-6-TVGDQMKK-7	PRPF6	PRPF6	>sp|O94906|PRP6_HUMAN Pre-mRNA-processing factor 6 OS=Homo sapiens OX=9606 GN=PRPF6 PE=1 SV=1	>sp|O94906|PRP6_HUMAN Pre-mRNA-processing factor 6 OS=Homo sapiens OX=9606 GN=PRPF6 PE=1 SV=1	53	61	0	941	941	sp|O94906|PRPF6	sp|O94906|PRPF6	PRPF6_53	PRPF6_61	PRPF6-53-PRPF6-61	>sp|O94906|PRP6_HUMAN Pre-mRNA-processing factor 6 OS=Homo sapiens OX=9606 GN=PRPF6 PE=1 SV=1-53->sp|O94906|PRP6_HUMAN Pre-mRNA-processing factor 6 OS=Homo sapiens OX=9606 GN=PRPF6 PE=1 SV=1-61	target	1
189-1-1-1-11-1	F1_20200821_HS_1090_FU_1_A12.mgf	9187	4	1765.9	1	HAPPGKR	6	48	>sp|O94906|PRP6_HUMAN Pre-mRNA-processing factor 6 OS=Homo sapiens OX=9606 GN=PRPF6 PE=1 SV=1	761.43	2.84517e-10	5.85658e-14	TLTTKER	5	529	>sp|Q6P2Q9|PRP8_HUMAN Pre-mRNA-processing-splicing factor 8 OS=Homo sapiens OX=9606 GN=PRPF8 PE=1 SV=2	847.476	6.21275e-17	6.21275e-17	HAPPGKR-6-TLTTKER-5	PRPF6	PRPF8	>sp|O94906|PRP6_HUMAN Pre-mRNA-processing factor 6 OS=Homo sapiens OX=9606 GN=PRPF6 PE=1 SV=1	>sp|Q6P2Q9|PRP8_HUMAN Pre-mRNA-processing-splicing factor 8 OS=Homo sapiens OX=9606 GN=PRPF8 PE=1 SV=2	53	533	0	941	2335	sp|O94906|PRPF6	sp|Q6P2Q9|PRPF8	PRPF6_53	PRPF8_533	PRPF6-53-PRPF8-533	>sp|O94906|PRP6_HUMAN Pre-mRNA-processing factor 6 OS=Homo sapiens OX=9606 GN=PRPF6 PE=1 SV=1-53->sp|Q6P2Q9|PRP8_HUMAN Pre-mRNA-processing-splicing factor 8 OS=Homo sapiens OX=9606 GN=PRPF8 PE=1 SV=2-533	target	1
2-1-1-1-17-1	F1_20200821_HS_1090_FU_1_B1.mgf	8124	4	1721.92	1	HAPPGKR	6	48	>sp|O94906|PRP6_HUMAN Pre-mRNA-processing factor 6 OS=Homo sapiens OX=9606 GN=PRPF6 PE=1 SV=1	761.43	6.13081e-12	6.13081e-12	GVAKTVTK	4	667	>sp|Q6P2Q9|PRP8_HUMAN Pre-mRNA-processing-splicing factor 8 OS=Homo sapiens OX=9606 GN=PRPF8 PE=1 SV=2	802.491	1.0021e-15	1.0021e-15	HAPPGKR-6-GVAKTVTK-4	PRPF6	PRPF8	>sp|O94906|PRP6_HUMAN Pre-mRNA-processing factor 6 OS=Homo sapiens OX=9606 GN=PRPF6 PE=1 SV=1	>sp|Q6P2Q9|PRP8_HUMAN Pre-mRNA-processing-splicing factor 8 OS=Homo sapiens OX=9606 GN=PRPF8 PE=1 SV=2	53	670	0	941	2335	sp|O94906|PRPF6	sp|Q6P2Q9|PRPF8	PRPF6_53	PRPF8_670	PRPF6-53-PRPF8-670	>sp|O94906|PRP6_HUMAN Pre-mRNA-processing factor 6 OS=Homo sapiens OX=9606 GN=PRPF6 PE=1 SV=1-53->sp|Q6P2Q9|PRP8_HUMAN Pre-mRNA-processing-splicing factor 8 OS=Homo sapiens OX=9606 GN=PRPF8 PE=1 SV=2-670	target	1
480-1-1-1-131-1	F1_20200821_HS_1090_FU_1_A9.mgf	26893	6	3876.94	1	HAPPGKR	6	48	>sp|O94906|PRP6_HUMAN Pre-mRNA-processing factor 6 OS=Homo sapiens OX=9606 GN=PRPF6 PE=1 SV=1	761.43	3.45139e-09	4.67478e-14	LPGHAGSINEVAFHPDEPIIISASSDKR	27	323	>sp|Q96DI7|SNR40_HUMAN U5 small nuclear ribonucleoprotein 40 kDa protein OS=Homo sapiens OX=9606 GN=SNRNP40 PE=1 SV=1	2956.5	1.99534e-39	1.99534e-39	HAPPGKR-6-LPGHAGSINEVAFHPDEPIIISASSDKR-27	PRPF6	SNRNP40	>sp|O94906|PRP6_HUMAN Pre-mRNA-processing factor 6 OS=Homo sapiens OX=9606 GN=PRPF6 PE=1 SV=1	>sp|Q96DI7|SNR40_HUMAN U5 small nuclear ribonucleoprotein 40 kDa protein OS=Homo sapiens OX=9606 GN=SNRNP40 PE=1 SV=1	53	349	0	941	357	sp|O94906|PRPF6	sp|Q96DI7|SNRNP40	PRPF6_53	SNRNP40_349	PRPF6-53-SNRNP40-349	>sp|O94906|PRP6_HUMAN Pre-mRNA-processing factor 6 OS=Homo sapiens OX=9606 GN=PRPF6 PE=1 SV=1-53->sp|Q96DI7|SNR40_HUMAN U5 small nuclear ribonucleoprotein 40 kDa protein OS=Homo sapiens OX=9606 GN=SNRNP40 PE=1 SV=1-349	target	1
460-1-4-1-30-1	F1_20200821_HS_1090_FU_1_A9.mgf	40117	6	5538.61	1	AVIGIGIEEEDRKHTWMEDADSCVAHNALECAR	13	528	>sp|O94906|PRP6_HUMAN Pre-mRNA-processing factor 6 OS=Homo sapiens OX=9606 GN=PRPF6 PE=1 SV=1	3781.72	1.18569e-50	1.76619e-73	AIYAYALQVFPSKK	13	561	>sp|O94906|PRP6_HUMAN Pre-mRNA-processing factor 6 OS=Homo sapiens OX=9606 GN=PRPF6 PE=1 SV=1	1597.89	1.62443e-50	1.62443e-50	AIYAYALQVFPSKK-13-AVIGIGIEEEDRKHTWMEDADSCVAHNALECAR-13	PRPF6	PRPF6	>sp|O94906|PRP6_HUMAN Pre-mRNA-processing factor 6 OS=Homo sapiens OX=9606 GN=PRPF6 PE=1 SV=1	>sp|O94906|PRP6_HUMAN Pre-mRNA-processing factor 6 OS=Homo sapiens OX=9606 GN=PRPF6 PE=1 SV=1	540	573	0	941	941	sp|O94906|PRPF6	sp|O94906|PRPF6	PRPF6_540	PRPF6_573	PRPF6-540-PRPF6-573	>sp|O94906|PRP6_HUMAN Pre-mRNA-processing factor 6 OS=Homo sapiens OX=9606 GN=PRPF6 PE=1 SV=1-540->sp|O94906|PRP6_HUMAN Pre-mRNA-processing factor 6 OS=Homo sapiens OX=9606 GN=PRPF6 PE=1 SV=1-573	target	1
255-1-2-1-4-1	F1_20200821_HS_1090_FU_1_A11.mgf	37326	4	2782.35	1	AAYFEKNHGTR	6	580	>sp|O94906|PRP6_HUMAN Pre-mRNA-processing factor 6 OS=Homo sapiens OX=9606 GN=PRPF6 PE=1 SV=1	1292.63	5.43584e-35	6.20907e-56	AEVLWLMGAKSK	10	607	>sp|O94906|PRP6_HUMAN Pre-mRNA-processing factor 6 OS=Homo sapiens OX=9606 GN=PRPF6 PE=1 SV=1	1331.73	1.06731e-46	1.06731e-46	AAYFEKNHGTR-6-AEVLWLMGAKSK-10	PRPF6	PRPF6	>sp|O94906|PRP6_HUMAN Pre-mRNA-processing factor 6 OS=Homo sapiens OX=9606 GN=PRPF6 PE=1 SV=1	>sp|O94906|PRP6_HUMAN Pre-mRNA-processing factor 6 OS=Homo sapiens OX=9606 GN=PRPF6 PE=1 SV=1	585	616	0	941	941	sp|O94906|PRPF6	sp|O94906|PRPF6	PRPF6_585	PRPF6_616	PRPF6-585-PRPF6-616	>sp|O94906|PRP6_HUMAN Pre-mRNA-processing factor 6 OS=Homo sapiens OX=9606 GN=PRPF6 PE=1 SV=1-585->sp|O94906|PRP6_HUMAN Pre-mRNA-processing factor 6 OS=Homo sapiens OX=9606 GN=PRPF6 PE=1 SV=1-616	target	1
88-1-2-1-4-1	F1_20200821_HS_1090_FU_1_A11.mgf	25870	6	3066.47	1	AAYFEKNHGTR	6	580	>sp|O94906|PRP6_HUMAN Pre-mRNA-processing factor 6 OS=Homo sapiens OX=9606 GN=PRPF6 PE=1 SV=1	1292.63	2.14146e-26	2.14146e-26	KCEHDPHVLLAVAK	1	836	>sp|O94906|PRP6_HUMAN Pre-mRNA-processing factor 6 OS=Homo sapiens OX=9606 GN=PRPF6 PE=1 SV=1	1615.85	9.36602e-53	4.37306e-64	AAYFEKNHGTR-6-KCEHDPHVLLAVAK-1	PRPF6	PRPF6	>sp|O94906|PRP6_HUMAN Pre-mRNA-processing factor 6 OS=Homo sapiens OX=9606 GN=PRPF6 PE=1 SV=1	>sp|O94906|PRP6_HUMAN Pre-mRNA-processing factor 6 OS=Homo sapiens OX=9606 GN=PRPF6 PE=1 SV=1	585	836	0	941	941	sp|O94906|PRPF6	sp|O94906|PRPF6	PRPF6_585	PRPF6_836	PRPF6-585-PRPF6-836	>sp|O94906|PRP6_HUMAN Pre-mRNA-processing factor 6 OS=Homo sapiens OX=9606 GN=PRPF6 PE=1 SV=1-585->sp|O94906|PRP6_HUMAN Pre-mRNA-processing factor 6 OS=Homo sapiens OX=9606 GN=PRPF6 PE=1 SV=1-836	target	1
114-1-2-1-3-1	F1_20200821_HS_1090_FU_1_B2.mgf	20970	4	3109.46	1	DSWLDNIDWVKIR	11	117	>sp|O95400|CD2B2_HUMAN CD2 antigen cytoplasmic tail-binding protein 2 OS=Homo sapiens OX=9606 GN=CD2BP2 PE=1 SV=1	1658.84	8.6713e-28	8.6713e-28	AAYFEKNHGTR	6	580	>sp|O94906|PRP6_HUMAN Pre-mRNA-processing factor 6 OS=Homo sapiens OX=9606 GN=PRPF6 PE=1 SV=1	1292.63	1.26405e-17	1.81006e-33	AAYFEKNHGTR-6-DSWLDNIDWVKIR-11	CD2BP2	PRPF6	>sp|O95400|CD2B2_HUMAN CD2 antigen cytoplasmic tail-binding protein 2 OS=Homo sapiens OX=9606 GN=CD2BP2 PE=1 SV=1	>sp|O94906|PRP6_HUMAN Pre-mRNA-processing factor 6 OS=Homo sapiens OX=9606 GN=PRPF6 PE=1 SV=1	127	585	0	341	941	sp|O95400|CD2BP2	sp|O94906|PRPF6	CD2BP2_127	PRPF6_585	CD2BP2-127-PRPF6-585	>sp|O94906|PRP6_HUMAN Pre-mRNA-processing factor 6 OS=Homo sapiens OX=9606 GN=PRPF6 PE=1 SV=1-585->sp|O95400|CD2B2_HUMAN CD2 antigen cytoplasmic tail-binding protein 2 OS=Homo sapiens OX=9606 GN=CD2BP2 PE=1 SV=1-127	target	1
388-1-11-1-1-1	F1_20200821_HS_1090_FU_1_A12.mgf	14672	4	1910.94	1	TVGDQMKK	7	55	>sp|O94906|PRP6_HUMAN Pre-mRNA-processing factor 6 OS=Homo sapiens OX=9606 GN=PRPF6 PE=1 SV=1	905.464	5.90991e-12	6.56706e-14	TLTTKER	5	529	>sp|Q6P2Q9|PRP8_HUMAN Pre-mRNA-processing-splicing factor 8 OS=Homo sapiens OX=9606 GN=PRPF8 PE=1 SV=2	847.476	6.72541e-17	6.72541e-17	TLTTKER-5-TVGDQMKK-7	PRPF6	PRPF8	>sp|O94906|PRP6_HUMAN Pre-mRNA-processing factor 6 OS=Homo sapiens OX=9606 GN=PRPF6 PE=1 SV=1	>sp|Q6P2Q9|PRP8_HUMAN Pre-mRNA-processing-splicing factor 8 OS=Homo sapiens OX=9606 GN=PRPF8 PE=1 SV=2	61	533	0	941	2335	sp|O94906|PRPF6	sp|Q6P2Q9|PRPF8	PRPF6_61	PRPF8_533	PRPF6-61-PRPF8-533	>sp|O94906|PRP6_HUMAN Pre-mRNA-processing factor 6 OS=Homo sapiens OX=9606 GN=PRPF6 PE=1 SV=1-61->sp|Q6P2Q9|PRP8_HUMAN Pre-mRNA-processing-splicing factor 8 OS=Homo sapiens OX=9606 GN=PRPF8 PE=1 SV=2-533	target	1
341-3-3-1-1-1	F1_20200821_HS_1090_FU_1_A12.mgf	9664	4	1788.88	1	TVGDQMKK	7	55	>sp|O94906|PRP6_HUMAN Pre-mRNA-processing factor 6 OS=Homo sapiens OX=9606 GN=PRPF6 PE=1 SV=1	905.464	2.91281e-14	2.91281e-14	HSKGVAK	3	664	>sp|Q6P2Q9|PRP8_HUMAN Pre-mRNA-processing-splicing factor 8 OS=Homo sapiens OX=9606 GN=PRPF8 PE=1 SV=2	725.418	2.31313e-10	6.13964e-23	HSKGVAK-3-TVGDQMKK-7	PRPF6	PRPF8	>sp|O94906|PRP6_HUMAN Pre-mRNA-processing factor 6 OS=Homo sapiens OX=9606 GN=PRPF6 PE=1 SV=1	>sp|Q6P2Q9|PRP8_HUMAN Pre-mRNA-processing-splicing factor 8 OS=Homo sapiens OX=9606 GN=PRPF8 PE=1 SV=2	61	666	0	941	2335	sp|O94906|PRPF6	sp|Q6P2Q9|PRPF8	PRPF6_61	PRPF8_666	PRPF6-61-PRPF8-666	>sp|O94906|PRP6_HUMAN Pre-mRNA-processing factor 6 OS=Homo sapiens OX=9606 GN=PRPF6 PE=1 SV=1-61->sp|Q6P2Q9|PRP8_HUMAN Pre-mRNA-processing-splicing factor 8 OS=Homo sapiens OX=9606 GN=PRPF8 PE=1 SV=2-666	target	1
449-1-17-1-1-1	F1_20200821_HS_1090_FU_1_A12.mgf	14866	4	1865.95	1	TVGDQMKK	7	55	>sp|O94906|PRP6_HUMAN Pre-mRNA-processing factor 6 OS=Homo sapiens OX=9606 GN=PRPF6 PE=1 SV=1	905.464	7.03602e-21	7.03602e-21	GVAKTVTK	4	667	>sp|Q6P2Q9|PRP8_HUMAN Pre-mRNA-processing-splicing factor 8 OS=Homo sapiens OX=9606 GN=PRPF8 PE=1 SV=2	802.491	3.91653e-14	3.91653e-14	GVAKTVTK-4-TVGDQMKK-7	PRPF6	PRPF8	>sp|O94906|PRP6_HUMAN Pre-mRNA-processing factor 6 OS=Homo sapiens OX=9606 GN=PRPF6 PE=1 SV=1	>sp|Q6P2Q9|PRP8_HUMAN Pre-mRNA-processing-splicing factor 8 OS=Homo sapiens OX=9606 GN=PRPF8 PE=1 SV=2	61	670	0	941	2335	sp|O94906|PRPF6	sp|Q6P2Q9|PRPF8	PRPF6_61	PRPF8_670	PRPF6-61-PRPF8-670	>sp|O94906|PRP6_HUMAN Pre-mRNA-processing factor 6 OS=Homo sapiens OX=9606 GN=PRPF6 PE=1 SV=1-61->sp|Q6P2Q9|PRP8_HUMAN Pre-mRNA-processing-splicing factor 8 OS=Homo sapiens OX=9606 GN=PRPF8 PE=1 SV=2-670	target	1
463-1-1-1-4-1	F1_20200821_HS_1090_FU_1_A12.mgf	39056	4	2303.23	1	AEVLWLMGAKSK	10	607	>sp|O94906|PRP6_HUMAN Pre-mRNA-processing factor 6 OS=Homo sapiens OX=9606 GN=PRPF6 PE=1 SV=1	1331.73	6.68462e-34	6.68462e-34	KIGDILR	1	925	>sp|O94906|PRP6_HUMAN Pre-mRNA-processing factor 6 OS=Homo sapiens OX=9606 GN=PRPF6 PE=1 SV=1	813.507	9.46413e-09	8.2208e-18	KIGDILR-1-AEVLWLMGAKSK-10	PRPF6	PRPF6	>sp|O94906|PRP6_HUMAN Pre-mRNA-processing factor 6 OS=Homo sapiens OX=9606 GN=PRPF6 PE=1 SV=1	>sp|O94906|PRP6_HUMAN Pre-mRNA-processing factor 6 OS=Homo sapiens OX=9606 GN=PRPF6 PE=1 SV=1	616	925	0	941	941	sp|O94906|PRPF6	sp|O94906|PRPF6	PRPF6_616	PRPF6_925	PRPF6-616-PRPF6-925	>sp|O94906|PRP6_HUMAN Pre-mRNA-processing factor 6 OS=Homo sapiens OX=9606 GN=PRPF6 PE=1 SV=1-616->sp|O94906|PRP6_HUMAN Pre-mRNA-processing factor 6 OS=Homo sapiens OX=9606 GN=PRPF6 PE=1 SV=1-925	target	1
167-1-1-1-1-1	F1_20200821_HS_1090_FU_1_B1.mgf	24823	4	2619.24	1	VFMKSVK	4	677	>sp|O94906|PRP6_HUMAN Pre-mRNA-processing factor 6 OS=Homo sapiens OX=9606 GN=PRPF6 PE=1 SV=1	837.478	7.63218e-08	1.16155e-13	HYEDFPKLWMMK	7	704	>sp|O94906|PRP6_HUMAN Pre-mRNA-processing factor 6 OS=Homo sapiens OX=9606 GN=PRPF6 PE=1 SV=1	1623.76	2.42923e-40	1.51883e-49	VFMKSVK-4-HYEDFPKLWMMK-7	PRPF6	PRPF6	>sp|O94906|PRP6_HUMAN Pre-mRNA-processing factor 6 OS=Homo sapiens OX=9606 GN=PRPF6 PE=1 SV=1	>sp|O94906|PRP6_HUMAN Pre-mRNA-processing factor 6 OS=Homo sapiens OX=9606 GN=PRPF6 PE=1 SV=1	680	710	0	941	941	sp|O94906|PRPF6	sp|O94906|PRPF6	PRPF6_680	PRPF6_710	PRPF6-680-PRPF6-710	>sp|O94906|PRP6_HUMAN Pre-mRNA-processing factor 6 OS=Homo sapiens OX=9606 GN=PRPF6 PE=1 SV=1-680->sp|O94906|PRP6_HUMAN Pre-mRNA-processing factor 6 OS=Homo sapiens OX=9606 GN=PRPF6 PE=1 SV=1-710	target	1
103-1-4-1-4-1	F1_20200821_HS_1090_FU_1_A11.mgf	18142	4	2929.36	1	GQIEEQKEMoMEKAR	12	716	>sp|O94906|PRP6_HUMAN Pre-mRNA-processing factor 6 OS=Homo sapiens OX=9606 GN=PRPF6 PE=1 SV=1	1721.81	2.19603e-12	2.96523e-22	EAYNQGLKK	8	730	>sp|O94906|PRP6_HUMAN Pre-mRNA-processing factor 6 OS=Homo sapiens OX=9606 GN=PRPF6 PE=1 SV=1	1049.55	3.4404e-21	3.4404e-21	EAYNQGLKK-8-GQIEEQKEMoMEKAR-12	PRPF6	PRPF6	>sp|O94906|PRP6_HUMAN Pre-mRNA-processing factor 6 OS=Homo sapiens OX=9606 GN=PRPF6 PE=1 SV=1	>sp|O94906|PRP6_HUMAN Pre-mRNA-processing factor 6 OS=Homo sapiens OX=9606 GN=PRPF6 PE=1 SV=1	727	737	0	941	941	sp|O94906|PRPF6	sp|O94906|PRPF6	PRPF6_727	PRPF6_737	PRPF6-727-PRPF6-737	>sp|O94906|PRP6_HUMAN Pre-mRNA-processing factor 6 OS=Homo sapiens OX=9606 GN=PRPF6 PE=1 SV=1-727->sp|O94906|PRP6_HUMAN Pre-mRNA-processing factor 6 OS=Homo sapiens OX=9606 GN=PRPF6 PE=1 SV=1-737	target	1
408-1-5-1-5-1	F1_20200821_HS_1090_FU_1_A12.mgf	19604	4	1962.08	1	AILEKSR	5	764	>sp|O94906|PRP6_HUMAN Pre-mRNA-processing factor 6 OS=Homo sapiens OX=9606 GN=PRPF6 PE=1 SV=1	815.487	1.48589e-12	1.48589e-12	TKSVDALKK	2	828	>sp|O94906|PRP6_HUMAN Pre-mRNA-processing factor 6 OS=Homo sapiens OX=9606 GN=PRPF6 PE=1 SV=1	988.592	8.17365e-14	2.96331e-23	AILEKSR-5-TKSVDALKK-2	PRPF6	PRPF6	>sp|O94906|PRP6_HUMAN Pre-mRNA-processing factor 6 OS=Homo sapiens OX=9606 GN=PRPF6 PE=1 SV=1	>sp|O94906|PRP6_HUMAN Pre-mRNA-processing factor 6 OS=Homo sapiens OX=9606 GN=PRPF6 PE=1 SV=1	768	829	0	941	941	sp|O94906|PRPF6	sp|O94906|PRPF6	PRPF6_768	PRPF6_829	PRPF6-768-PRPF6-829	>sp|O94906|PRP6_HUMAN Pre-mRNA-processing factor 6 OS=Homo sapiens OX=9606 GN=PRPF6 PE=1 SV=1-768->sp|O94906|PRP6_HUMAN Pre-mRNA-processing factor 6 OS=Homo sapiens OX=9606 GN=PRPF6 PE=1 SV=1-829	target	1
38-1-7-1-4-1	F1_20200821_HS_1090_FU_1_A10.mgf	21565	6	2791.45	1	RTKSVDALK	3	827	>sp|O94906|PRP6_HUMAN Pre-mRNA-processing factor 6 OS=Homo sapiens OX=9606 GN=PRPF6 PE=1 SV=1	1016.6	5.49125e-25	6.48136e-32	KCEHDPHVLLAVAK	1	836	>sp|O94906|PRP6_HUMAN Pre-mRNA-processing factor 6 OS=Homo sapiens OX=9606 GN=PRPF6 PE=1 SV=1	1615.85	9.49437e-52	6.05279e-59	RTKSVDALK-3-KCEHDPHVLLAVAK-1	PRPF6	PRPF6	>sp|O94906|PRP6_HUMAN Pre-mRNA-processing factor 6 OS=Homo sapiens OX=9606 GN=PRPF6 PE=1 SV=1	>sp|O94906|PRP6_HUMAN Pre-mRNA-processing factor 6 OS=Homo sapiens OX=9606 GN=PRPF6 PE=1 SV=1	829	836	0	941	941	sp|O94906|PRPF6	sp|O94906|PRPF6	PRPF6_829	PRPF6_836	PRPF6-829-PRPF6-836	>sp|O94906|PRP6_HUMAN Pre-mRNA-processing factor 6 OS=Homo sapiens OX=9606 GN=PRPF6 PE=1 SV=1-829->sp|O94906|PRP6_HUMAN Pre-mRNA-processing factor 6 OS=Homo sapiens OX=9606 GN=PRPF6 PE=1 SV=1-836	target	1
350-1-2-1-2-1	F1_20200821_HS_1090_FU_1_A12.mgf	12937	4	1632.92	1	SVDALKK	6	830	>sp|O94906|PRP6_HUMAN Pre-mRNA-processing factor 6 OS=Homo sapiens OX=9606 GN=PRPF6 PE=1 SV=1	759.449	7.31406e-24	7.31406e-24	KITKAR	4	856	>sp|O94906|PRP6_HUMAN Pre-mRNA-processing factor 6 OS=Homo sapiens OX=9606 GN=PRPF6 PE=1 SV=1	715.47	6.56502e-13	1.82207e-18	KITKAR-4-SVDALKK-6	PRPF6	PRPF6	>sp|O94906|PRP6_HUMAN Pre-mRNA-processing factor 6 OS=Homo sapiens OX=9606 GN=PRPF6 PE=1 SV=1	>sp|O94906|PRP6_HUMAN Pre-mRNA-processing factor 6 OS=Homo sapiens OX=9606 GN=PRPF6 PE=1 SV=1	835	859	0	941	941	sp|O94906|PRPF6	sp|O94906|PRPF6	PRPF6_835	PRPF6_859	PRPF6-835-PRPF6-859	>sp|O94906|PRP6_HUMAN Pre-mRNA-processing factor 6 OS=Homo sapiens OX=9606 GN=PRPF6 PE=1 SV=1-835->sp|O94906|PRP6_HUMAN Pre-mRNA-processing factor 6 OS=Homo sapiens OX=9606 GN=PRPF6 PE=1 SV=1-859	target	1
123-1-2-1-2-1	F1_20200821_HS_1090_FU_1_A11.mgf	21305	5	2489.32	1	KCEHDPHVLLAVAK	1	836	>sp|O94906|PRP6_HUMAN Pre-mRNA-processing factor 6 OS=Homo sapiens OX=9606 GN=PRPF6 PE=1 SV=1	1615.85	1.9489e-59	1.51929e-74	KITKAR	4	856	>sp|O94906|PRP6_HUMAN Pre-mRNA-processing factor 6 OS=Homo sapiens OX=9606 GN=PRPF6 PE=1 SV=1	715.47	9.77995e-14	2.66207e-17	KITKAR-4-KCEHDPHVLLAVAK-1	PRPF6	PRPF6	>sp|O94906|PRP6_HUMAN Pre-mRNA-processing factor 6 OS=Homo sapiens OX=9606 GN=PRPF6 PE=1 SV=1	>sp|O94906|PRP6_HUMAN Pre-mRNA-processing factor 6 OS=Homo sapiens OX=9606 GN=PRPF6 PE=1 SV=1	836	859	0	941	941	sp|O94906|PRPF6	sp|O94906|PRPF6	PRPF6_836	PRPF6_859	PRPF6-836-PRPF6-859	>sp|O94906|PRP6_HUMAN Pre-mRNA-processing factor 6 OS=Homo sapiens OX=9606 GN=PRPF6 PE=1 SV=1-836->sp|O94906|PRP6_HUMAN Pre-mRNA-processing factor 6 OS=Homo sapiens OX=9606 GN=PRPF6 PE=1 SV=1-859	target	1
120-1-2-1-3-1	F1_20200821_HS_1090_FU_1_A12.mgf	32547	4	3479.55	1	GLFSANDWQCKTCSNVNWAR	11	62	>sp|O95218|ZRAB2_HUMAN Zinc finger Ran-binding domain-containing protein 2 OS=Homo sapiens OX=9606 GN=ZRANB2 PE=1 SV=2	2413.07	5.19011e-16	5.19011e-16	YAKLEER	3	93	>sp|O95218|ZRAB2_HUMAN Zinc finger Ran-binding domain-containing protein 2 OS=Homo sapiens OX=9606 GN=ZRANB2 PE=1 SV=2	907.476	2.17951e-11	2.76187e-18	YAKLEER-3-GLFSANDWQCKTCSNVNWAR-11	ZRANB2	ZRANB2	>sp|O95218|ZRAB2_HUMAN Zinc finger Ran-binding domain-containing protein 2 OS=Homo sapiens OX=9606 GN=ZRANB2 PE=1 SV=2	>sp|O95218|ZRAB2_HUMAN Zinc finger Ran-binding domain-containing protein 2 OS=Homo sapiens OX=9606 GN=ZRANB2 PE=1 SV=2	72	95	0	330	330	sp|O95218|ZRANB2	sp|O95218|ZRANB2	ZRANB2_72	ZRANB2_95	ZRANB2-72-ZRANB2-95	>sp|O95218|ZRAB2_HUMAN Zinc finger Ran-binding domain-containing protein 2 OS=Homo sapiens OX=9606 GN=ZRANB2 PE=1 SV=2-72->sp|O95218|ZRAB2_HUMAN Zinc finger Ran-binding domain-containing protein 2 OS=Homo sapiens OX=9606 GN=ZRANB2 PE=1 SV=2-95	target	1
65-1-1-1-1-1	F1_20200821_HS_1090_FU_1_A12.mgf	5880	4	2359.04	1	SSVKSGSR	4	389	>sp|O95232|LC7L3_HUMAN Luc7-like protein 3 OS=Homo sapiens OX=9606 GN=LUC7L3 PE=1 SV=2	806.425	2.10664e-09	1.52525e-12	EKQSEDTNTESK	2	397	>sp|O95232|LC7L3_HUMAN Luc7-like protein 3 OS=Homo sapiens OX=9606 GN=LUC7L3 PE=1 SV=2	1394.62	7.74577e-27	7.74577e-27	SSVKSGSR-4-EKQSEDTNTESK-2	LUC7L3	LUC7L3	>sp|O95232|LC7L3_HUMAN Luc7-like protein 3 OS=Homo sapiens OX=9606 GN=LUC7L3 PE=1 SV=2	>sp|O95232|LC7L3_HUMAN Luc7-like protein 3 OS=Homo sapiens OX=9606 GN=LUC7L3 PE=1 SV=2	392	398	0	432	432	sp|O95232|LUC7L3	sp|O95232|LUC7L3	LUC7L3_392	LUC7L3_398	LUC7L3-392-LUC7L3-398	>sp|O95232|LC7L3_HUMAN Luc7-like protein 3 OS=Homo sapiens OX=9606 GN=LUC7L3 PE=1 SV=2-392->sp|O95232|LC7L3_HUMAN Luc7-like protein 3 OS=Homo sapiens OX=9606 GN=LUC7L3 PE=1 SV=2-398	target	1
373-1-1-1-3-1	F1_20200821_HS_1090_FU_1_B1.mgf	27613	4	2347.13	1	DSWLDNIDWVKIR	11	117	>sp|O95400|CD2B2_HUMAN CD2 antigen cytoplasmic tail-binding protein 2 OS=Homo sapiens OX=9606 GN=CD2BP2 PE=1 SV=1	1658.84	7.80074e-50	7.80074e-50	GGGKGR	4	182	>sp|O95400|CD2B2_HUMAN CD2 antigen cytoplasmic tail-binding protein 2 OS=Homo sapiens OX=9606 GN=CD2BP2 PE=1 SV=1	530.292	2.33842e-06	1.02442e-16	GGGKGR-4-DSWLDNIDWVKIR-11	CD2BP2	CD2BP2	>sp|O95400|CD2B2_HUMAN CD2 antigen cytoplasmic tail-binding protein 2 OS=Homo sapiens OX=9606 GN=CD2BP2 PE=1 SV=1	>sp|O95400|CD2B2_HUMAN CD2 antigen cytoplasmic tail-binding protein 2 OS=Homo sapiens OX=9606 GN=CD2BP2 PE=1 SV=1	127	185	0	341	341	sp|O95400|CD2BP2	sp|O95400|CD2BP2	CD2BP2_127	CD2BP2_185	CD2BP2-127-CD2BP2-185	>sp|O95400|CD2B2_HUMAN CD2 antigen cytoplasmic tail-binding protein 2 OS=Homo sapiens OX=9606 GN=CD2BP2 PE=1 SV=1-127->sp|O95400|CD2B2_HUMAN CD2 antigen cytoplasmic tail-binding protein 2 OS=Homo sapiens OX=9606 GN=CD2BP2 PE=1 SV=1-185	target	1
41-1-2-1-3-1	F1_20200821_HS_1090_FU_1_A12.mgf	39339	4	2954.43	1	DSWLDNIDWVKIR	11	117	>sp|O95400|CD2B2_HUMAN CD2 antigen cytoplasmic tail-binding protein 2 OS=Homo sapiens OX=9606 GN=CD2BP2 PE=1 SV=1	1658.84	6.11395e-46	6.11395e-46	KGPGQPSSPQR	1	188	>sp|O95400|CD2B2_HUMAN CD2 antigen cytoplasmic tail-binding protein 2 OS=Homo sapiens OX=9606 GN=CD2BP2 PE=1 SV=1	1137.59	2.63598e-17	1.1794e-30	KGPGQPSSPQR-1-DSWLDNIDWVKIR-11	CD2BP2	CD2BP2	>sp|O95400|CD2B2_HUMAN CD2 antigen cytoplasmic tail-binding protein 2 OS=Homo sapiens OX=9606 GN=CD2BP2 PE=1 SV=1	>sp|O95400|CD2B2_HUMAN CD2 antigen cytoplasmic tail-binding protein 2 OS=Homo sapiens OX=9606 GN=CD2BP2 PE=1 SV=1	127	188	0	341	341	sp|O95400|CD2BP2	sp|O95400|CD2BP2	CD2BP2_127	CD2BP2_188	CD2BP2-127-CD2BP2-188	>sp|O95400|CD2B2_HUMAN CD2 antigen cytoplasmic tail-binding protein 2 OS=Homo sapiens OX=9606 GN=CD2BP2 PE=1 SV=1-127->sp|O95400|CD2B2_HUMAN CD2 antigen cytoplasmic tail-binding protein 2 OS=Homo sapiens OX=9606 GN=CD2BP2 PE=1 SV=1-188	target	1
116-1-6-1-3-1	F1_20200821_HS_1090_FU_1_A12.mgf	41384	4	3212.59	1	DSWLDNIDWVKIR	11	117	>sp|O95400|CD2B2_HUMAN CD2 antigen cytoplasmic tail-binding protein 2 OS=Homo sapiens OX=9606 GN=CD2BP2 PE=1 SV=1	1658.84	4.31967e-39	1.68265e-42	KLVDPVAGSGGPGSR	1	26	>sp|O95400|CD2B2_HUMAN CD2 antigen cytoplasmic tail-binding protein 2 OS=Homo sapiens OX=9606 GN=CD2BP2 PE=1 SV=1	1395.75	8.73123e-45	2.61558e-64	KLVDPVAGSGGPGSR-1-DSWLDNIDWVKIR-11	CD2BP2	CD2BP2	>sp|O95400|CD2B2_HUMAN CD2 antigen cytoplasmic tail-binding protein 2 OS=Homo sapiens OX=9606 GN=CD2BP2 PE=1 SV=1	>sp|O95400|CD2B2_HUMAN CD2 antigen cytoplasmic tail-binding protein 2 OS=Homo sapiens OX=9606 GN=CD2BP2 PE=1 SV=1	127	26	0	341	341	sp|O95400|CD2BP2	sp|O95400|CD2BP2	CD2BP2_127	CD2BP2_26	CD2BP2-127-CD2BP2-26	>sp|O95400|CD2B2_HUMAN CD2 antigen cytoplasmic tail-binding protein 2 OS=Homo sapiens OX=9606 GN=CD2BP2 PE=1 SV=1-127->sp|O95400|CD2B2_HUMAN CD2 antigen cytoplasmic tail-binding protein 2 OS=Homo sapiens OX=9606 GN=CD2BP2 PE=1 SV=1-26	target	1
266-2-1-1-3-1	F1_20200821_HS_1090_FU_1_B1.mgf	29140	4	3266.57	1	DSWLDNIDWVKIR	11	117	>sp|O95400|CD2B2_HUMAN CD2 antigen cytoplasmic tail-binding protein 2 OS=Homo sapiens OX=9606 GN=CD2BP2 PE=1 SV=1	1658.84	6.08999e-44	1.57854e-46	KLDPPGGQFYNSK	1	321	>sp|O95400|CD2B2_HUMAN CD2 antigen cytoplasmic tail-binding protein 2 OS=Homo sapiens OX=9606 GN=CD2BP2 PE=1 SV=1	1449.73	8.08624e-19	7.61738e-29	KLDPPGGQFYNSK-1-DSWLDNIDWVKIR-11	CD2BP2	CD2BP2	>sp|O95400|CD2B2_HUMAN CD2 antigen cytoplasmic tail-binding protein 2 OS=Homo sapiens OX=9606 GN=CD2BP2 PE=1 SV=1	>sp|O95400|CD2B2_HUMAN CD2 antigen cytoplasmic tail-binding protein 2 OS=Homo sapiens OX=9606 GN=CD2BP2 PE=1 SV=1	127	321	0	341	341	sp|O95400|CD2BP2	sp|O95400|CD2BP2	CD2BP2_127	CD2BP2_321	CD2BP2-127-CD2BP2-321	>sp|O95400|CD2B2_HUMAN CD2 antigen cytoplasmic tail-binding protein 2 OS=Homo sapiens OX=9606 GN=CD2BP2 PE=1 SV=1-127->sp|O95400|CD2B2_HUMAN CD2 antigen cytoplasmic tail-binding protein 2 OS=Homo sapiens OX=9606 GN=CD2BP2 PE=1 SV=1-321	target	1
129-1-15-1-3-1	F1_20200821_HS_1090_FU_1_A12.mgf	41432	4	2918.44	1	DSWLDNIDWVKIR	11	117	>sp|O95400|CD2B2_HUMAN CD2 antigen cytoplasmic tail-binding protein 2 OS=Homo sapiens OX=9606 GN=CD2BP2 PE=1 SV=1	1658.84	1.05933e-43	1.05933e-43	IGLNSKMPSR	6	1301	>sp|Q6P2Q9|PRP8_HUMAN Pre-mRNA-processing-splicing factor 8 OS=Homo sapiens OX=9606 GN=PRPF8 PE=1 SV=2	1101.6	1.18283e-15	5.82773e-29	IGLNSKMPSR-6-DSWLDNIDWVKIR-11	CD2BP2	PRPF8	>sp|O95400|CD2B2_HUMAN CD2 antigen cytoplasmic tail-binding protein 2 OS=Homo sapiens OX=9606 GN=CD2BP2 PE=1 SV=1	>sp|Q6P2Q9|PRP8_HUMAN Pre-mRNA-processing-splicing factor 8 OS=Homo sapiens OX=9606 GN=PRPF8 PE=1 SV=2	127	1306	0	341	2335	sp|O95400|CD2BP2	sp|Q6P2Q9|PRPF8	CD2BP2_127	PRPF8_1306	CD2BP2-127-PRPF8-1306	>sp|O95400|CD2B2_HUMAN CD2 antigen cytoplasmic tail-binding protein 2 OS=Homo sapiens OX=9606 GN=CD2BP2 PE=1 SV=1-127->sp|Q6P2Q9|PRP8_HUMAN Pre-mRNA-processing-splicing factor 8 OS=Homo sapiens OX=9606 GN=PRPF8 PE=1 SV=2-1306	target	1
284-1-1-1-2-1	F1_20200821_HS_1090_FU_1_A11.mgf	6953	4	1825.88	1	GGGKGR	4	182	>sp|O95400|CD2B2_HUMAN CD2 antigen cytoplasmic tail-binding protein 2 OS=Homo sapiens OX=9606 GN=CD2BP2 PE=1 SV=1	530.292	8.31091e-07	1.09356e-16	KGPGQPSSPQR	1	188	>sp|O95400|CD2B2_HUMAN CD2 antigen cytoplasmic tail-binding protein 2 OS=Homo sapiens OX=9606 GN=CD2BP2 PE=1 SV=1	1137.59	5.51936e-27	5.51936e-27	GGGKGR-4-KGPGQPSSPQR-1	CD2BP2	CD2BP2	>sp|O95400|CD2B2_HUMAN CD2 antigen cytoplasmic tail-binding protein 2 OS=Homo sapiens OX=9606 GN=CD2BP2 PE=1 SV=1	>sp|O95400|CD2B2_HUMAN CD2 antigen cytoplasmic tail-binding protein 2 OS=Homo sapiens OX=9606 GN=CD2BP2 PE=1 SV=1	185	188	0	341	341	sp|O95400|CD2BP2	sp|O95400|CD2BP2	CD2BP2_185	CD2BP2_188	CD2BP2-185-CD2BP2-188	>sp|O95400|CD2B2_HUMAN CD2 antigen cytoplasmic tail-binding protein 2 OS=Homo sapiens OX=9606 GN=CD2BP2 PE=1 SV=1-185->sp|O95400|CD2B2_HUMAN CD2 antigen cytoplasmic tail-binding protein 2 OS=Homo sapiens OX=9606 GN=CD2BP2 PE=1 SV=1-188	target	1
166-1-1-1-3-1	F1_20200821_HS_1090_FU_1_A10.mgf	29411	4	2934.39	1	GGGKGR	4	182	>sp|O95400|CD2B2_HUMAN CD2 antigen cytoplasmic tail-binding protein 2 OS=Homo sapiens OX=9606 GN=CD2BP2 PE=1 SV=1	530.292	3.60508e-09	1.31649e-17	VTFQGVGDEEDEDEIIVPKK	19	6	>sp|O95400|CD2B2_HUMAN CD2 antigen cytoplasmic tail-binding protein 2 OS=Homo sapiens OX=9606 GN=CD2BP2 PE=1 SV=1	2246.1	2.1965e-57	2.1965e-57	GGGKGR-4-VTFQGVGDEEDEDEIIVPKK-19	CD2BP2	CD2BP2	>sp|O95400|CD2B2_HUMAN CD2 antigen cytoplasmic tail-binding protein 2 OS=Homo sapiens OX=9606 GN=CD2BP2 PE=1 SV=1	>sp|O95400|CD2B2_HUMAN CD2 antigen cytoplasmic tail-binding protein 2 OS=Homo sapiens OX=9606 GN=CD2BP2 PE=1 SV=1	185	24	0	341	341	sp|O95400|CD2BP2	sp|O95400|CD2BP2	CD2BP2_185	CD2BP2_24	CD2BP2-185-CD2BP2-24	>sp|O95400|CD2B2_HUMAN CD2 antigen cytoplasmic tail-binding protein 2 OS=Homo sapiens OX=9606 GN=CD2BP2 PE=1 SV=1-185->sp|O95400|CD2B2_HUMAN CD2 antigen cytoplasmic tail-binding protein 2 OS=Homo sapiens OX=9606 GN=CD2BP2 PE=1 SV=1-24	target	1
86-1-1-1-4-1	F1_20200821_HS_1090_FU_1_B1.mgf	12271	4	2212.13	1	GGGKGR	4	182	>sp|O95400|CD2B2_HUMAN CD2 antigen cytoplasmic tail-binding protein 2 OS=Homo sapiens OX=9606 GN=CD2BP2 PE=1 SV=1	530.292	9.95083e-05	4.35927e-15	KKLVDPVAGSGGPGSR	1	25	>sp|O95400|CD2B2_HUMAN CD2 antigen cytoplasmic tail-binding protein 2 OS=Homo sapiens OX=9606 GN=CD2BP2 PE=1 SV=1	1523.84	3.44364e-38	2.15405e-41	GGGKGR-4-KKLVDPVAGSGGPGSR-1	CD2BP2	CD2BP2	>sp|O95400|CD2B2_HUMAN CD2 antigen cytoplasmic tail-binding protein 2 OS=Homo sapiens OX=9606 GN=CD2BP2 PE=1 SV=1	>sp|O95400|CD2B2_HUMAN CD2 antigen cytoplasmic tail-binding protein 2 OS=Homo sapiens OX=9606 GN=CD2BP2 PE=1 SV=1	185	25	0	341	341	sp|O95400|CD2BP2	sp|O95400|CD2BP2	CD2BP2_185	CD2BP2_25	CD2BP2-185-CD2BP2-25	>sp|O95400|CD2B2_HUMAN CD2 antigen cytoplasmic tail-binding protein 2 OS=Homo sapiens OX=9606 GN=CD2BP2 PE=1 SV=1-185->sp|O95400|CD2B2_HUMAN CD2 antigen cytoplasmic tail-binding protein 2 OS=Homo sapiens OX=9606 GN=CD2BP2 PE=1 SV=1-25	target	1
107-1-1-1-5-1	F1_20200821_HS_1090_FU_1_A12.mgf	15369	4	2212.13	1	GGGKGR	4	182	>sp|O95400|CD2B2_HUMAN CD2 antigen cytoplasmic tail-binding protein 2 OS=Homo sapiens OX=9606 GN=CD2BP2 PE=1 SV=1	530.292	2.94963e-09	1.4212e-18	KKLVDPVAGSGGPGSR	2	25	>sp|O95400|CD2B2_HUMAN CD2 antigen cytoplasmic tail-binding protein 2 OS=Homo sapiens OX=9606 GN=CD2BP2 PE=1 SV=1	1523.84	2.15043e-58	3.6401e-64	GGGKGR-4-KKLVDPVAGSGGPGSR-2	CD2BP2	CD2BP2	>sp|O95400|CD2B2_HUMAN CD2 antigen cytoplasmic tail-binding protein 2 OS=Homo sapiens OX=9606 GN=CD2BP2 PE=1 SV=1	>sp|O95400|CD2B2_HUMAN CD2 antigen cytoplasmic tail-binding protein 2 OS=Homo sapiens OX=9606 GN=CD2BP2 PE=1 SV=1	185	26	0	341	341	sp|O95400|CD2BP2	sp|O95400|CD2BP2	CD2BP2_185	CD2BP2_26	CD2BP2-185-CD2BP2-26	>sp|O95400|CD2B2_HUMAN CD2 antigen cytoplasmic tail-binding protein 2 OS=Homo sapiens OX=9606 GN=CD2BP2 PE=1 SV=1-185->sp|O95400|CD2B2_HUMAN CD2 antigen cytoplasmic tail-binding protein 2 OS=Homo sapiens OX=9606 GN=CD2BP2 PE=1 SV=1-26	target	1
197-1-1-1-1-1	F1_20200821_HS_1090_FU_1_A12.mgf	20580	4	2138.02	1	GGGKGR	4	182	>sp|O95400|CD2B2_HUMAN CD2 antigen cytoplasmic tail-binding protein 2 OS=Homo sapiens OX=9606 GN=CD2BP2 PE=1 SV=1	530.292	8.28273e-07	8.60362e-15	KLDPPGGQFYNSK	1	321	>sp|O95400|CD2B2_HUMAN CD2 antigen cytoplasmic tail-binding protein 2 OS=Homo sapiens OX=9606 GN=CD2BP2 PE=1 SV=1	1449.73	1.06247e-49	1.06247e-49	GGGKGR-4-KLDPPGGQFYNSK-1	CD2BP2	CD2BP2	>sp|O95400|CD2B2_HUMAN CD2 antigen cytoplasmic tail-binding protein 2 OS=Homo sapiens OX=9606 GN=CD2BP2 PE=1 SV=1	>sp|O95400|CD2B2_HUMAN CD2 antigen cytoplasmic tail-binding protein 2 OS=Homo sapiens OX=9606 GN=CD2BP2 PE=1 SV=1	185	321	0	341	341	sp|O95400|CD2BP2	sp|O95400|CD2BP2	CD2BP2_185	CD2BP2_321	CD2BP2-185-CD2BP2-321	>sp|O95400|CD2B2_HUMAN CD2 antigen cytoplasmic tail-binding protein 2 OS=Homo sapiens OX=9606 GN=CD2BP2 PE=1 SV=1-185->sp|O95400|CD2B2_HUMAN CD2 antigen cytoplasmic tail-binding protein 2 OS=Homo sapiens OX=9606 GN=CD2BP2 PE=1 SV=1-321	target	1
50-1-1-1-7-1	F1_20200821_HS_1090_FU_1_B1.mgf	14132	4	2294.12	1	GGGKGR	4	182	>sp|O95400|CD2B2_HUMAN CD2 antigen cytoplasmic tail-binding protein 2 OS=Homo sapiens OX=9606 GN=CD2BP2 PE=1 SV=1	530.292	2.76794e-13	5.12192e-23	KLDPPGGQFYNSKR	13	321	>sp|O95400|CD2B2_HUMAN CD2 antigen cytoplasmic tail-binding protein 2 OS=Homo sapiens OX=9606 GN=CD2BP2 PE=1 SV=1	1605.83	6.95426e-41	1.41416e-52	GGGKGR-4-KLDPPGGQFYNSKR-13	CD2BP2	CD2BP2	>sp|O95400|CD2B2_HUMAN CD2 antigen cytoplasmic tail-binding protein 2 OS=Homo sapiens OX=9606 GN=CD2BP2 PE=1 SV=1	>sp|O95400|CD2B2_HUMAN CD2 antigen cytoplasmic tail-binding protein 2 OS=Homo sapiens OX=9606 GN=CD2BP2 PE=1 SV=1	185	333	0	341	341	sp|O95400|CD2BP2	sp|O95400|CD2BP2	CD2BP2_185	CD2BP2_333	CD2BP2-185-CD2BP2-333	>sp|O95400|CD2B2_HUMAN CD2 antigen cytoplasmic tail-binding protein 2 OS=Homo sapiens OX=9606 GN=CD2BP2 PE=1 SV=1-185->sp|O95400|CD2B2_HUMAN CD2 antigen cytoplasmic tail-binding protein 2 OS=Homo sapiens OX=9606 GN=CD2BP2 PE=1 SV=1-333	target	1
135-1-1-1-11-1	F1_20200821_HS_1090_FU_1_B2.mgf	6234	4	1780.93	1	GGGKGR	4	182	>sp|O95400|CD2B2_HUMAN CD2 antigen cytoplasmic tail-binding protein 2 OS=Homo sapiens OX=9606 GN=CD2BP2 PE=1 SV=1	530.292	5.44418e-09	7.79033e-17	LIKHAVQER	3	242	>sp|Q15029|U5S1_HUMAN 116 kDa U5 small nuclear ribonucleoprotein component OS=Homo sapiens OX=9606 GN=EFTUD2 PE=1 SV=1	1092.64	1.69777e-23	1.69777e-23	GGGKGR-4-LIKHAVQER-3	CD2BP2	EFTUD2	>sp|O95400|CD2B2_HUMAN CD2 antigen cytoplasmic tail-binding protein 2 OS=Homo sapiens OX=9606 GN=CD2BP2 PE=1 SV=1	>sp|Q15029|U5S1_HUMAN 116 kDa U5 small nuclear ribonucleoprotein component OS=Homo sapiens OX=9606 GN=EFTUD2 PE=1 SV=1	185	244	0	341	972	sp|O95400|CD2BP2	sp|Q15029|EFTUD2	CD2BP2_185	EFTUD2_244	CD2BP2-185-EFTUD2-244	>sp|O95400|CD2B2_HUMAN CD2 antigen cytoplasmic tail-binding protein 2 OS=Homo sapiens OX=9606 GN=CD2BP2 PE=1 SV=1-185->sp|Q15029|U5S1_HUMAN 116 kDa U5 small nuclear ribonucleoprotein component OS=Homo sapiens OX=9606 GN=EFTUD2 PE=1 SV=1-244	target	1
277-1-1-1-16-1	F1_20200821_HS_1090_FU_1_B2.mgf	6813	4	1902.9	1	GGGKGR	4	182	>sp|O95400|CD2B2_HUMAN CD2 antigen cytoplasmic tail-binding protein 2 OS=Homo sapiens OX=9606 GN=CD2BP2 PE=1 SV=1	530.292	8.76273e-15	3.0542e-22	KYVNGSTYQR	1	218	>sp|Q6P2Q9|PRP8_HUMAN Pre-mRNA-processing-splicing factor 8 OS=Homo sapiens OX=9606 GN=PRPF8 PE=1 SV=2	1214.6	1.77422e-23	1.77422e-23	GGGKGR-4-KYVNGSTYQR-1	CD2BP2	PRPF8	>sp|O95400|CD2B2_HUMAN CD2 antigen cytoplasmic tail-binding protein 2 OS=Homo sapiens OX=9606 GN=CD2BP2 PE=1 SV=1	>sp|Q6P2Q9|PRP8_HUMAN Pre-mRNA-processing-splicing factor 8 OS=Homo sapiens OX=9606 GN=PRPF8 PE=1 SV=2	185	218	0	341	2335	sp|O95400|CD2BP2	sp|Q6P2Q9|PRPF8	CD2BP2_185	PRPF8_218	CD2BP2-185-PRPF8-218	>sp|O95400|CD2B2_HUMAN CD2 antigen cytoplasmic tail-binding protein 2 OS=Homo sapiens OX=9606 GN=CD2BP2 PE=1 SV=1-185->sp|Q6P2Q9|PRP8_HUMAN Pre-mRNA-processing-splicing factor 8 OS=Homo sapiens OX=9606 GN=PRPF8 PE=1 SV=2-218	target	1
9-1-1-1-20-1	F1_20200821_HS_1090_FU_1_A11.mgf	22495	6	2833.32	1	GGGKGR	4	182	>sp|O95400|CD2B2_HUMAN CD2 antigen cytoplasmic tail-binding protein 2 OS=Homo sapiens OX=9606 GN=CD2BP2 PE=1 SV=1	530.292	8.74412e-14	2.64973e-18	KFGFVDAQKEDMoPPEHVR	1	50	>sp|Q6P2Q9|PRP8_HUMAN Pre-mRNA-processing-splicing factor 8 OS=Homo sapiens OX=9606 GN=PRPF8 PE=1 SV=2	2145.03	8.06112e-35	6.3423e-41	GGGKGR-4-KFGFVDAQKEDMoPPEHVR-1	CD2BP2	PRPF8	>sp|O95400|CD2B2_HUMAN CD2 antigen cytoplasmic tail-binding protein 2 OS=Homo sapiens OX=9606 GN=CD2BP2 PE=1 SV=1	>sp|Q6P2Q9|PRP8_HUMAN Pre-mRNA-processing-splicing factor 8 OS=Homo sapiens OX=9606 GN=PRPF8 PE=1 SV=2	185	50	0	341	2335	sp|O95400|CD2BP2	sp|Q6P2Q9|PRPF8	CD2BP2_185	PRPF8_50	CD2BP2-185-PRPF8-50	>sp|O95400|CD2B2_HUMAN CD2 antigen cytoplasmic tail-binding protein 2 OS=Homo sapiens OX=9606 GN=CD2BP2 PE=1 SV=1-185->sp|Q6P2Q9|PRP8_HUMAN Pre-mRNA-processing-splicing factor 8 OS=Homo sapiens OX=9606 GN=PRPF8 PE=1 SV=2-50	target	1
[truncated: 346 more rows]

## Sheet: BR2
index	file_name	scan	charge	precursor_mass	spectra_num	peptide_a	xl_a	pep_pos_a	protein_a	mass_a	n_score_a	n_score_a_MS2_MS3	peptide_b	xl_b	pep_pos_b	protein_b	mass_b	n_score_b	n_score_b_MS2_MS3	peptide_a_b	gene_a	gene_b	protein_a_cln	protein_b_cln	LinkPos1	LinkPos2	shared_seq	length_protein_a	length_protein_b	Protein1	Protein2	pro_site_a	pro_site_b	pro_site_ab	protein_a_b	target_decoy	FDR_cutoff
[truncated: 457 more rows]

## Sheet: Crosslinked peptides 
Crosslinked peptides found at least twice in all the fours experiments in the CCC
SNRNP200-SNRNP200_1006-1049
SNRNP200-SNRNP200_1134-1176
SNRNP200-SNRNP200_1141-1146
SNRNP200-SNRNP200_1169-1176
SNRNP200-SNRNP200_1294-1716
PRPF8-SNRNP200_1344-14
DDX23-SNRNP200_251-14
SNRNP200-SNRNP200_1404-1421
SNRNP200-SNRNP200_1404-2059
SNRNP200-SNRNP200_1421-1443
SNRNP200-SNRNP200_1421-2059
SNRNP200-SNRNP200_1431-1918
PRPF8-SNRNP200_1993-144
SNRNP200-SNRNP200_155-745
SNRNP200-SNRNP200_1552-971
SNRNP200-SNRNP200_1552-975
SNRNP200-SNRNP200_1595-1610
[truncated: 116 more rows]

## Sheet: Distances of XL-Lys
Readout XL distances from the U5 snRNP complex (PDB: 8Q7X) including a predicted AlphaFold-3 of CD2BP2 (predicted from a complex with PRP8)
[truncated: 128 more rows]
